# Supplementary material
Source: ML conference proceedings conference paper supplement (https://openreview.net/forum?id=A0YvRCa5jM)
Supplement: supplementary_material [file first_gnn_fromA_iter0_j=2_nlyr=30.xlsx]

## Sheet: Iteration_0
True_Label	Pred_Label_First	Pred_Label_Second	Pred_Label_Refined	Loss_First	Acc_First	pen_GNN_Feature_first1	pen_GNN_Feature_first2	pen_GNN_Feature_first3	pen_GNN_Feature_first4	pen_GNN_Feature_first5	pen_GNN_Feature_first6	pen_GNN_Feature_first7	pen_GNN_Feature_first8	pen_GNN_Feature_first9	pen_GNN_Feature_first10	pen_GNN_Feature_first11	pen_GNN_Feature_first12	pen_GNN_Feature_first13	pen_GNN_Feature_first14	pen_GNN_Feature_first15	pen_GNN_Feature_first16	pen_GNN_Feature_second1	pen_GNN_Feature_second2	pen_GNN_Feature_second3	pen_GNN_Feature_second4	pen_GNN_Feature_second5	pen_GNN_Feature_second6	pen_GNN_Feature_second7	pen_GNN_Feature_second8	Adj_EigVecs_Top1	Adj_EigVecs_Top2
0	0	0	0	0.406109	0.948445	-0.0227141	0.0206291	-0.0207151	-0.0118328	0.017966	-0.00747169	-0.0265393	0.00750775	-0.00801897	0.0234449	0.0124649	-0.0115465	-0.0244987	0.0100746	-0.0110485	0.020668	-0.0415133	-0.00714363	0.008079	0.0142264	0.0125634	-0.0182059	-0.0162107	0.0120801	-0.0223061	0.00923375
0	0	0	0	0.406109	0.948445	-0.0227141	0.0427875	-0.0207151	-0.0118328	0.0432401	-0.00747169	-0.0265393	0.0504447	-0.0179956	0.0445094	0.0178062	-0.027072	-0.0430533	0.0144928	-0.0153754	0.0337237	-0.0415133	0.00336071	0.0430338	0.0433012	0.0393447	-0.0349798	-0.0401059	0.0388878	-0.040735	0.0254664
0	1	0	0	0.406109	0.948445	-0.0217897	-0.0107032	-0.0207151	-0.0010047	-0.0207441	-0.00747169	-0.00996999	-0.017536	0.00182047	-0.00338185	-0.00532319	-0.00115434	0.00182721	-0.00125312	0.000647775	-0.00213578	0.0081797	-0.0206725	-0.0114581	-0.0110983	-0.0106684	-0.00354001	0.00543249	-0.0122656	-0.00181895	-0.00132506
0	0	0	0	0.406109	0.948445	-0.0227141	-0.00980779	-0.0207151	-0.00338427	-0.0048943	-0.00747169	-0.0199292	-0.0147005	-0.00529093	0.001345	-0.00861007	-0.0102427	-0.00576249	-0.00103531	-0.00019547	0.00321579	0.00854485	-0.0228768	-0.0114581	-0.0106033	-0.0110823	-0.00475515	0.00515307	-0.0127032	-0.000379019	0.000110658
0	0	0	0	0.406109	0.948445	-0.0227141	0.000894861	-0.0207151	-0.00435287	0.0203013	-0.00747169	-0.0265393	0.00473563	-0.012771	0.0100963	-0.000819816	-0.0103231	-0.0186087	0.0023656	-0.00418624	0.0125576	0.00536614	-0.0225147	-0.0114581	-0.00901017	-0.00990857	-0.00497426	0.00427294	-0.0115356	-0.00128944	0.000923759
0	0	0	0	0.406109	0.948445	-0.0227141	0.0288046	-0.0207151	-0.0118328	0.0483289	-0.00747169	-0.0265393	0.0358812	-0.0184924	0.0329346	0.0110802	-0.0204826	-0.0385848	0.0109161	-0.0130062	0.0286053	-0.0415133	-0.0121319	0.0127418	0.017477	0.013402	-0.0217066	-0.0179507	0.0126406	-0.020112	0.0137936
0	0	0	0	0.406109	0.948445	-0.0227141	0.0111037	-0.0207151	-0.010136	0.0382223	-0.00747169	-0.0265393	0.0124223	-0.0146262	0.0223619	0.0104464	-0.0149486	-0.0292579	0.00757898	-0.00922834	0.0214958	-0.0204451	-0.0167831	-0.00840976	-0.000169484	-0.00135986	-0.00911861	-0.00330869	-0.00258749	-0.0100652	0.00393309
0	0	0	0	0.406109	0.948445	-0.0227141	0.0174429	-0.0207151	-0.0118328	0.0399049	-0.00747169	-0.0265393	0.019895	-0.0153935	0.0269829	0.0100807	-0.0187067	-0.0318974	0.00918047	-0.0109652	0.0252592	-0.0415133	-0.00997064	0.000806012	0.00838532	0.00755758	-0.0134732	-0.0110387	0.00681306	-0.0170134	0.00790548
0	1	1	1	0.406109	0.948445	-0.0145198	-0.0177835	-0.0160219	-0.00255714	-0.0207441	-0.00747169	-0.00624055	-0.017536	0.00321049	-0.00593429	-0.011801	-0.00621724	0.00671991	-0.00292807	0.00300143	-0.00388548	0.0104532	-0.021482	-0.0114581	-0.0116495	-0.0115285	-0.00296068	0.00620796	-0.0131394	-0.000443265	-0.00118304
0	0	0	0	0.406109	0.948445	-0.0227141	0.00921854	-0.0207151	-0.00956213	0.0470317	-0.00747169	-0.0265393	0.0219092	-0.0190005	0.022954	0.00731092	-0.0174397	-0.0323898	0.00737876	-0.00925932	0.0254693	0.00229762	-0.0233342	-0.0114581	-0.00723623	-0.0089768	-0.00618712	0.00310399	-0.0106875	-0.00282367	0.00152279
0	0	0	0	0.406109	0.948445	-0.0227141	0.0490293	-0.0207151	-0.0118328	0.0282057	-0.00747169	-0.0265393	0.041374	-0.0111442	0.0432113	0.0205142	-0.0224825	-0.0379754	0.0156064	-0.0150029	0.0284834	-0.0415133	0.0135768	0.0525707	0.0523176	0.0501989	-0.0377213	-0.0480265	0.0502645	-0.0509158	0.0280822
0	0	0	0	0.406109	0.948445	-0.0227141	0.0471365	-0.0207151	-0.0118328	-0.00774447	-0.00747169	-0.0265393	0.00893883	0.00106932	0.0277339	0.0199795	-0.00988546	-0.0222023	0.015624	-0.0151695	0.0183191	-0.0415133	0.0574994	0.0464925	0.0529027	0.0673246	-0.0229006	-0.0527074	0.0689434	-0.0726142	0.0156496
0	0	0	0	0.406109	0.948445	-0.0227141	0.0522154	-0.0207151	-0.0118328	0.0395396	-0.00747169	-0.0265393	0.0615246	-0.0174679	0.0507532	0.0224972	-0.0273915	-0.0452389	0.0166067	-0.0158829	0.0355074	-0.0415133	0.00372165	0.0539562	0.0527523	0.047496	-0.0453796	-0.049298	0.0466746	-0.046598	0.030554
0	0	0	0	0.406109	0.948445	-0.0227141	0.0412349	-0.0207151	-0.0118328	0.00118218	-0.00747169	-0.0265393	0.00761887	-0.00182124	0.0267849	0.0129976	-0.0121686	-0.0219368	0.0134675	-0.0145741	0.0192393	-0.0415133	0.0203726	0.0400578	0.0427454	0.0449349	-0.027442	-0.0403644	0.045134	-0.0470232	0.0212661
0	0	0	0	0.406109	0.948445	-0.0227141	-0.00601547	-0.0207151	-0.00415454	0.00474435	-0.00747169	-0.0265393	-0.00827374	-0.00782001	0.00548533	-0.0052942	-0.0113766	-0.0105787	0.000639013	-0.001758	0.0073504	0.00743865	-0.022698	-0.0114581	-0.0102735	-0.0107492	-0.00492527	0.00482893	-0.0123713	-0.00103598	9.5818e-05
0	0	0	0	0.406109	0.948445	-0.0227141	0.0396728	-0.0207151	-0.0118328	0.0386344	-0.00747169	-0.0265393	0.0378541	-0.0153277	0.0399587	0.0166252	-0.0249116	-0.0392121	0.0136381	-0.0149754	0.0296057	-0.0415133	0.00322469	0.0431186	0.0418262	0.0374694	-0.0296441	-0.0366619	0.0369183	-0.0390602	0.0245973
0	0	0	0	0.406109	0.948445	-0.0227141	0.00167812	-0.0207151	-0.00232946	0.0168768	-0.00747169	-0.0265393	0.000200061	-0.0109948	0.0090143	0.000458868	-0.00719917	-0.0174075	0.00196013	-0.00407538	0.00994823	0.00638335	-0.022924	-0.0114581	-0.00892991	-0.00994879	-0.00475453	0.00444388	-0.0116474	-0.00167009	0.000801848
0	0	0	0	0.406109	0.948445	-0.0227141	0.0155571	-0.0207151	-0.0118328	0.0323625	-0.00747169	-0.0265393	0.0122783	-0.0127693	0.0242009	0.010084	-0.0155384	-0.0280972	0.00890403	-0.010333	0.0228972	-0.0407711	-0.011377	0.000159033	0.00698877	0.00558062	-0.0120098	-0.00902987	0.00464268	-0.0151788	0.00689336
0	0	0	0	0.406109	0.948445	-0.0227141	0.0271975	-0.0207151	-0.0118328	-0.00351785	-0.00747169	-0.0265393	-0.00691191	-5.20242e-05	0.0191451	0.0121274	-0.0064992	-0.0167564	0.0109922	-0.0126192	0.0152774	-0.0415133	0.0173235	0.0190652	0.0256437	0.0304637	-0.0180889	-0.0275146	0.0306631	-0.0392368	0.00954764
0	0	0	0	0.406109	0.948445	-0.0227141	0.0170905	-0.0207151	-0.0118328	0.00120193	-0.00747169	-0.0265393	-0.00843223	-0.00294275	0.0149013	0.0113983	-0.00478087	-0.0166318	0.00838649	-0.00853759	0.0128861	-0.0415133	-0.00156162	0.00932178	0.0151732	0.0156063	-0.0146282	-0.0164215	0.0149959	-0.0244695	0.00908169
0	0	0	0	0.406109	0.948445	-0.0227141	0.059748	-0.0207151	-0.0118328	0.0097967	-0.00747169	-0.0265393	0.0475599	-0.00549073	0.0443516	0.0274788	-0.0166542	-0.0347947	0.0178784	-0.0129457	0.025566	-0.0415133	0.0133569	0.0588615	0.0594264	0.0567384	-0.0493225	-0.0568363	0.0568403	-0.0588716	0.0306756
0	0	0	0	0.406109	0.948445	-0.0227141	0.0419382	-0.0207151	-0.0118328	0.0167623	-0.00747169	-0.0265393	0.0284925	-0.00829951	0.0347511	0.0201216	-0.0160824	-0.0316184	0.0144472	-0.013677	0.0242199	-0.0415133	0.00494333	0.0401911	0.0415161	0.0388241	-0.0351274	-0.0396556	0.0383543	-0.0420679	0.0231792
0	0	0	0	0.406109	0.948445	-0.0227141	0.00835271	-0.0207151	-0.00826034	0.0447446	-0.00747169	-0.0265393	0.0188223	-0.0181413	0.021475	0.00671058	-0.0163827	-0.0308676	0.00682052	-0.00892951	0.0241944	0.00332329	-0.0222546	-0.0114581	-0.00814755	-0.00925091	-0.00512828	0.00372547	-0.0108618	-0.00221695	0.00109524
0	0	0	0	0.406109	0.948445	-0.0227141	0.0258253	-0.0207151	-0.0118328	0.0194542	-0.00747169	-0.0265393	0.0137991	-0.00873526	0.0268628	0.0136446	-0.0137853	-0.0269214	0.0112457	-0.0119766	0.0224127	-0.0415133	-0.00421682	0.0190729	0.0225156	0.0196867	-0.020856	-0.0217745	0.0191577	-0.0270748	0.0137469
0	0	0	0	0.406109	0.948445	-0.0227141	0.0111001	-0.0207151	-0.0105989	0.0349593	-0.00747169	-0.0265393	0.00987786	-0.0130973	0.0215986	0.00923726	-0.014106	-0.0275261	0.00759483	-0.00908004	0.0204365	-0.0156638	-0.0181973	-0.0111098	-0.00214888	-0.00329294	-0.00948239	-0.0021166	-0.00461485	-0.00890638	0.00263595
0	0	0	0	0.406109	0.948445	-0.0227141	0.0432416	-0.0207151	-0.0118328	0.0487075	-0.00747169	-0.0265393	0.0557458	-0.01979	0.0466145	0.0191448	-0.0269746	-0.0455095	0.0149247	-0.0156776	0.0354815	-0.0415133	-0.00155016	0.0406931	0.0409548	0.0357975	-0.0355854	-0.0378857	0.0349432	-0.0374176	0.025068
0	0	0	0	0.406109	0.948445	-0.0227141	-0.0125394	-0.0207151	-0.00476007	-0.0115369	-0.00747169	-0.0185103	-0.017536	-0.00385754	4.28948e-05	-0.0104014	-0.011381	-0.00313103	-0.00126473	0.00053442	0.00309987	0.0103126	-0.0236734	-0.0114581	-0.0108133	-0.0116103	-0.0042874	0.00568693	-0.0133261	-5.6842e-05	3.09726e-05
0	0	0	0	0.406109	0.948445	-0.0227141	0.0491783	-0.0207151	-0.0118328	0.0155354	-0.00747169	-0.0265393	0.0342767	-0.00764426	0.0387444	0.0214742	-0.0181539	-0.033551	0.0153364	-0.0139655	0.0248808	-0.0415133	0.0221544	0.0538875	0.0551488	0.0565413	-0.0374723	-0.0519949	0.0566131	-0.0576625	0.0281026
0	0	0	0	0.406109	0.948445	-0.0227141	0.000148989	-0.0207151	-0.00476939	0.00238377	-0.00747169	-0.0265393	-0.017536	-0.00277864	0.00737526	0.00696186	-0.000570371	-0.0113389	0.00427459	-0.00492968	0.00831373	-0.000355768	-0.0153591	-0.0114581	-0.00903061	-0.00754792	-0.00322348	0.00352709	-0.00882019	-0.0052722	-0.00213804
0	0	0	0	0.406109	0.948445	-0.0227141	-0.00622054	-0.0207151	-0.00255012	0.00419245	-0.00747169	-0.0228967	-0.0106744	-0.00699952	0.00388782	-0.00613151	-0.0101145	-0.00984769	-0.000297724	-0.0014304	0.00437053	0.00759774	-0.0233068	-0.0114581	-0.0101705	-0.0109013	-0.00546243	0.00471471	-0.0125457	-0.000839072	0.000292371
0	0	0	0	0.406109	0.948445	-0.0227141	0.00339009	-0.0207151	-0.00328619	0.0168118	-0.00747169	-0.0265393	0.00124444	-0.010905	0.0101435	-0.000316172	-0.00872106	-0.0177036	0.00240102	-0.00457987	0.0109802	0.000889408	-0.0216776	-0.0114581	-0.007177	-0.0081562	-0.00617536	0.00267265	-0.00970052	-0.00306071	0.00162602
0	0	0	0	0.406109	0.948445	-0.0227141	0.057763	-0.0207151	-0.0118328	0.0386763	-0.00747169	-0.0265393	0.0607269	-0.016874	0.0501724	0.0206193	-0.0277467	-0.0455751	0.0163381	-0.0163845	0.0346139	-0.0415133	0.0172121	0.0659817	0.0633794	0.0599379	-0.0434239	-0.0566808	0.0601165	-0.0560427	0.0355507
0	0	0	0	0.406109	0.948445	-0.0227141	0.0152043	-0.0207151	-0.0118328	0.042764	-0.00747169	-0.0265393	0.0188654	-0.0159964	0.0262995	0.0109562	-0.0188125	-0.0324234	0.00883675	-0.0103808	0.0242814	-0.0353299	-0.0142874	-0.000545328	0.00599935	0.00391788	-0.0117239	-0.00788708	0.00291943	-0.0143103	0.00689631
0	0	0	0	0.406109	0.948445	-0.0227141	0.00850593	-0.0207151	-0.00518215	0.0342004	-0.00747169	-0.0265393	0.015082	-0.0164198	0.0156833	0.00345164	-0.0108694	-0.0261584	0.00443873	-0.00710956	0.017775	0.000322824	-0.0216075	-0.0114581	-0.00682888	-0.00802634	-0.00575716	0.00274391	-0.00962499	-0.00257753	0.00204487
0	0	0	0	0.406109	0.948445	-0.0227141	-0.0029121	-0.0207151	-0.0032768	0.00916566	-0.00747169	-0.0265393	-0.00359319	-0.00956165	0.00618682	-0.00410648	-0.00973962	-0.0131755	0.000736851	-0.00261196	0.00793867	0.00554487	-0.0224593	-0.0114581	-0.00950146	-0.0100899	-0.00559943	0.00414616	-0.0116979	-0.00113476	0.000694672
0	0	0	0	0.406109	0.948445	-0.0227141	0.0305339	-0.0207151	-0.0118328	0.0562431	-0.00747169	-0.0265393	0.0436964	-0.0209238	0.0386091	0.0146227	-0.025139	-0.0432288	0.0128016	-0.0145099	0.0331439	-0.0415133	-0.0107048	0.0201649	0.0227371	0.01757	-0.0230575	-0.0212137	0.0167957	-0.0234843	0.0162947
0	0	0	0	0.406109	0.948445	-0.0227141	0.085724	-0.0207151	-0.0118328	0.0111922	-0.00747169	-0.0265393	0.0773354	-0.00858157	0.061143	0.0368155	-0.0251475	-0.0443675	0.0221587	-0.0146868	0.0321649	-0.0415133	0.0339173	0.108567	0.0990034	0.0944086	-0.0659678	-0.0873857	0.0943581	-0.0824641	0.051691
0	0	0	0	0.406109	0.948445	-0.0227141	0.0117679	-0.0207151	-0.00750778	0.0409732	-0.00747169	-0.0265393	0.0191805	-0.017166	0.0199099	0.00468114	-0.0145089	-0.0296205	0.00592867	-0.00809909	0.0202049	-0.0102225	-0.0197061	-0.0114581	-0.00311679	-0.00461308	-0.00800928	-0.00051367	-0.00602961	-0.00572946	0.00368589
0	0	0	0	0.406109	0.948445	-0.0227141	0.0178531	-0.0207151	-0.0118328	0.0367643	-0.00747169	-0.0265393	0.0173051	-0.0140683	0.0268111	0.0110057	-0.0176404	-0.03064	0.00966329	-0.0110261	0.024813	-0.0415133	-0.0110011	0.00262453	0.00901699	0.00727297	-0.0135152	-0.0107591	0.00640636	-0.0165939	0.0079343
0	0	0	0	0.406109	0.948445	-0.0227141	0.00227591	-0.0207151	-0.00498749	0.0160239	-0.00747169	-0.0265393	-0.00889573	-0.00760223	0.0114846	0.00679485	-0.00524286	-0.0173214	0.00450793	-0.00584878	0.0123123	0.0031174	-0.019965	-0.0114581	-0.00895807	-0.00893898	-0.00431107	0.00392903	-0.0104867	-0.00360337	-0.000516975
0	0	0	0	0.406109	0.948445	-0.0227141	-0.00933068	-0.0207151	-0.00460676	-0.00463532	-0.00747169	-0.0222777	-0.0127496	-0.00585463	0.00230615	-0.00843585	-0.0111945	-0.00655953	-0.000470751	-0.000569875	0.00523705	0.00842112	-0.0231552	-0.0114581	-0.0104893	-0.0111265	-0.00486292	0.00511132	-0.0127921	-0.000340573	0.000224021
0	0	0	0	0.406109	0.948445	-0.0227141	0.00813247	-0.0207151	-0.00634305	0.031379	-0.00747169	-0.0265393	0.0152515	-0.0159292	0.0158757	0.00251921	-0.0122813	-0.0254287	0.00463884	-0.00679685	0.017652	-0.00186931	-0.0225601	-0.0114581	-0.00563146	-0.0073353	-0.0078322	0.00148697	-0.00900774	-0.00348134	0.00263178
0	0	0	0	0.406109	0.948445	-0.0227141	0.0593328	-0.0207151	-0.0118328	0.0268719	-0.00747169	-0.0265393	0.0574605	-0.013015	0.0503359	0.0238466	-0.0259891	-0.0419539	0.0173819	-0.0160106	0.0328991	-0.0415133	0.0231719	0.0660646	0.065142	0.0642843	-0.0467138	-0.0609499	0.0644844	-0.0618436	0.0339713
0	0	0	0	0.406109	0.948445	-0.0227141	0.00910712	-0.0207151	-0.00600454	0.0369681	-0.00747169	-0.0265393	0.0137472	-0.0158207	0.0178926	0.00476981	-0.0124859	-0.0269585	0.00532848	-0.0074937	0.0190444	-0.00133525	-0.020641	-0.0114581	-0.00671705	-0.00754026	-0.00575737	0.002355	-0.00902971	-0.00356433	0.00172344
0	0	0	0	0.406109	0.948445	-0.0227141	-0.00288505	-0.0207151	-0.00293591	0.00730274	-0.00747169	-0.0265393	-0.00312664	-0.00988953	0.00565616	-0.00415747	-0.00878929	-0.0126407	0.000577597	-0.00260696	0.00819679	0.00632029	-0.0224408	-0.0114581	-0.00954314	-0.0101887	-0.00488509	0.00453362	-0.0118289	-0.000891322	0.000697313
0	0	0	0	0.406109	0.948445	-0.0227141	-0.00669225	-0.0207151	-0.00341694	-0.000543728	-0.00747169	-0.0238458	-0.00930681	-0.00749741	0.00294882	-0.00660331	-0.00920435	-0.00857817	-0.000303945	-0.00135258	0.00578025	0.00745551	-0.0227317	-0.0114581	-0.0100951	-0.0106592	-0.00486956	0.00484259	-0.0123241	-0.000549863	0.000424859
0	0	0	0	0.406109	0.948445	-0.0227141	0.0144674	-0.0207151	-0.00938422	0.0455385	-0.00747169	-0.0265393	0.0246412	-0.0190785	0.0226762	0.00718868	-0.0146594	-0.0327883	0.00732362	-0.0097638	0.024224	-0.00919042	-0.0211292	-0.0114581	-0.00349936	-0.00530458	-0.00927269	-0.000585921	-0.00683394	-0.00535112	0.00356332
0	0	0	0	0.406109	0.948445	-0.0227141	0.14302	0.0113033	-0.0118328	-0.0207441	-0.00747169	-0.0265393	0.199668	0.0386137	0.112508	0.161804	0.0126748	-0.0590942	0.0594716	0.0435942	0.028801	-0.0415133	0.0862306	0.169173	0.169416	0.176054	-0.14344	-0.170957	0.178662	-0.16055	0.0766183
0	0	0	0	0.406109	0.948445	-0.0227141	0.0846708	-0.0207151	-0.0118328	0.0358822	-0.00747169	-0.0265393	0.0955266	-0.018182	0.0700379	0.0339141	-0.0348464	-0.0554205	0.0203888	-0.0158201	0.0395138	-0.0415133	0.0387932	0.111623	0.102818	0.0993895	-0.0667983	-0.0910809	0.0998006	-0.0839152	0.0552309
0	1	1	0	0.406109	0.948445	0.00124153	-0.0194581	-0.00255568	0.000344591	-0.0207441	-0.00747169	0.00486851	-0.017536	0.00932586	-0.0113499	-0.00965439	0.00267255	0.0139588	-0.00360069	0.00423426	-0.0106136	0.010755	-0.0190557	-0.0114581	-0.0125383	-0.0115048	-0.00168845	0.00671994	-0.0129196	-0.00162474	-0.00296665
0	0	0	0	0.406109	0.948445	-0.0227141	-0.00933068	-0.0207151	-0.00460676	-0.00463532	-0.00747169	-0.0222777	-0.0127496	-0.00585463	0.00230615	-0.00843585	-0.0111945	-0.00655953	-0.000470751	-0.000569875	0.00523705	0.00842112	-0.0231552	-0.0114581	-0.0104893	-0.0111265	-0.00486292	0.00511132	-0.0127921	-0.000340573	0.000224021
0	0	0	0	0.406109	0.948445	-0.0227141	0.000976635	-0.0207151	-0.00438859	0.0202724	-0.00747169	-0.0265393	0.00486238	-0.0127471	0.0101228	-0.000858974	-0.0103195	-0.0186493	0.00237902	-0.00420184	0.0125996	0.00587649	-0.0230158	-0.0114581	-0.00897258	-0.0100766	-0.00505027	0.00435243	-0.0117538	-0.00130365	0.000936777
0	0	0	0	0.406109	0.948445	-0.0227141	0.00123258	-0.0207151	-0.00355506	0.0102405	-0.00747169	-0.0265393	-0.00980453	-0.00639885	0.00915968	0.001624	-0.00652777	-0.0139939	0.00310864	-0.00375078	0.00852464	0.00137357	-0.0203757	-0.0114581	-0.00852917	-0.00861751	-0.00578633	0.00306813	-0.0100002	-0.00390159	4.73804e-06
0	0	0	0	0.406109	0.948445	-0.0227141	0.0311565	-0.0207151	-0.0118328	0.0455923	-0.00747169	-0.0265393	0.0392214	-0.0185097	0.0331444	0.0114001	-0.0196514	-0.0387319	0.0111988	-0.012934	0.0283381	-0.0415133	-0.0117209	0.0132968	0.018896	0.0150956	-0.0243119	-0.0198369	0.0142295	-0.0210613	0.0146725
0	0	0	0	0.406109	0.948445	-0.0227141	-0.00822871	-0.0207151	-0.00485488	-0.00325658	-0.00747169	-0.0233388	-0.0116983	-0.00610526	0.00307583	-0.00798252	-0.0113781	-0.00743816	-0.000134575	-0.000984618	0.00588139	0.00865981	-0.023536	-0.0114581	-0.0103653	-0.0111385	-0.00501729	0.00508316	-0.0128813	-0.000358009	0.000302212
0	0	0	0	0.406109	0.948445	-0.0227141	-0.00759905	-0.0207151	-0.00404556	-0.00278941	-0.00747169	-0.0229647	-0.0108293	-0.00675636	0.00228737	-0.00727894	-0.00969093	-0.0074809	-0.000355753	-0.00103121	0.00517466	0.00613292	-0.0225873	-0.0114581	-0.00970954	-0.0102422	-0.00556446	0.00430713	-0.0118971	-0.000867653	0.000611348
0	0	0	0	0.406109	0.948445	-0.0227141	0.0134712	-0.0207151	-0.0118328	-0.00387358	-0.00747169	-0.0265393	-0.0159641	-0.00074987	0.0130982	0.0100832	-0.00359884	-0.012868	0.00806261	-0.00936888	0.0124262	-0.0415133	-0.0045698	0.00320312	0.0101468	0.0109879	-0.0139721	-0.0129887	0.00990896	-0.0207464	0.00630066
0	0	0	0	0.406109	0.948445	-0.0227141	0.00701212	-0.0207151	-0.0069926	0.0370805	-0.00747169	-0.0265393	0.013363	-0.0159331	0.0180615	0.00403977	-0.0145678	-0.0268699	0.00539605	-0.00744041	0.0197855	0.00181182	-0.0216106	-0.0114581	-0.00805722	-0.0088177	-0.00572143	0.00319527	-0.0103785	-0.00250966	0.00111653
0	0	0	0	0.406109	0.948445	-0.0227141	0.0209472	-0.0207151	-0.0118328	0.0479403	-0.00747169	-0.0265393	0.0297624	-0.0184033	0.0309827	0.011054	-0.0217859	-0.0364727	0.0104127	-0.0120134	0.0286333	-0.0415133	-0.0127706	0.00432456	0.0107923	0.00839777	-0.0170461	-0.0128815	0.00738811	-0.0166554	0.00987681
0	0	0	0	0.406109	0.948445	-0.0227141	0.104067	-0.0207151	-0.0118328	0.0143199	-0.00747169	-0.0265393	0.108349	-0.0106185	0.0764677	0.0464998	-0.0282324	-0.0527594	0.0241051	-0.0124488	0.0364521	-0.0415133	0.0508101	0.12837	0.120012	0.118345	-0.0820948	-0.109388	0.119435	-0.100836	0.0621141
0	0	0	0	0.406109	0.948445	-0.0227141	0.0180772	-0.0207151	-0.0118328	0.0435027	-0.00747169	-0.0265393	0.0214814	-0.0165474	0.0257263	0.00756109	-0.0189298	-0.0326065	0.00817266	-0.0103198	0.0233173	-0.0394388	-0.0115663	-0.00331784	0.00550512	0.00500563	-0.0132188	-0.00916509	0.00422395	-0.0141064	0.0071087
0	0	0	0	0.406109	0.948445	-0.0227141	0.0844661	-0.0207151	-0.0118328	0.0147672	-0.00747169	-0.0265393	0.0805161	-0.009693	0.0620207	0.0363077	-0.0251405	-0.045345	0.0217003	-0.0141448	0.0328379	-0.0415133	0.0326136	0.0985212	0.0930613	0.0902644	-0.0673113	-0.0854198	0.09034	-0.079455	0.0491
0	0	0	1	0.406109	0.948445	-0.0227141	-0.00212365	-0.0207151	-0.00192476	0.00852535	-0.00747169	-0.0265393	-0.00648548	-0.00844287	0.00582601	-0.0018285	-0.00661947	-0.0129745	0.00088779	-0.00260063	0.00682259	0.00780718	-0.023104	-0.0114581	-0.00946779	-0.0103689	-0.00463756	0.00480004	-0.0120539	-0.00134048	0.000513636
0	0	0	0	0.406109	0.948445	-0.0227141	0.00994916	-0.0207151	-0.00877092	0.0470056	-0.00747169	-0.0265393	0.0204465	-0.0186344	0.0223866	0.00754105	-0.0163829	-0.0319348	0.00722813	-0.0094097	0.0247053	-0.000855585	-0.0216529	-0.0114581	-0.0064682	-0.00784475	-0.00592955	0.00245064	-0.00941322	-0.00338239	0.00187407
0	0	0	0	0.406109	0.948445	-0.0227141	0.0130856	-0.0207151	-0.00807215	0.0222658	-0.00747169	-0.0265393	0.00715551	-0.0100887	0.01637	0.0039057	-0.0102947	-0.0222219	0.00566705	-0.00699212	0.0143934	-0.019889	-0.0200543	-0.00941665	0.000192513	-0.00155955	-0.0138821	-0.00470583	-0.00303616	-0.00947443	0.00488661
0	0	0	0	0.406109	0.948445	-0.0227141	0.0161991	-0.0207151	-0.0118328	0.0517052	-0.00747169	-0.0265393	0.0264801	-0.0192836	0.0269348	0.00942698	-0.0183664	-0.0356838	0.00878284	-0.0110395	0.0267691	-0.0183935	-0.0189381	-0.00817168	0.000191408	-0.00181709	-0.0109968	-0.00353869	-0.00308053	-0.00814024	0.00520263
0	1	1	0	0.406109	0.948445	0.00432182	-0.0110338	-0.0120562	0.000769126	-0.0207441	-0.00747169	0.00522049	-0.017536	0.0105882	-0.0119809	-0.00217775	0.0141296	0.0137897	-0.00193195	0.000275988	-0.00863937	0.00556304	-0.0139048	-0.0114581	-0.0106425	-0.00893783	-1.31817e-05	0.00583798	-0.0102464	-0.0040698	-0.00391316
0	0	0	0	0.406109	0.948445	-0.0227141	-0.00103491	-0.0207151	-0.0016857	0.00213651	-0.00747169	-0.0258657	-0.0123215	-0.00587567	0.00572734	-0.00138089	-0.00473298	-0.0101005	0.00131512	-0.00262966	0.00709859	0.00272806	-0.019977	-0.0114581	-0.00928077	-0.00905903	-0.00456371	0.00389727	-0.0105869	-0.003113	-0.000272107
0	0	0	0	0.406109	0.948445	-0.0227141	0.0327732	-0.0207151	-0.0118328	0.0360333	-0.00747169	-0.0265393	0.0356936	-0.0147408	0.0368128	0.0152703	-0.0215025	-0.0363863	0.0124169	-0.0133124	0.029119	-0.0415133	-0.00506042	0.0281654	0.0301087	0.0259043	-0.0268475	-0.0282866	0.024951	-0.0323112	0.0184432
0	0	0	0	0.406109	0.948445	-0.0227141	-0.00405209	-0.0207151	-0.00307597	0.00488443	-0.00747169	-0.0265393	-0.00527736	-0.00907507	0.00483707	-0.00483007	-0.00883872	-0.0113515	0.000316348	-0.00223685	0.00746621	0.00656507	-0.0224333	-0.0114581	-0.00975209	-0.0103282	-0.00487136	0.00461442	-0.0119589	-0.000834799	0.000566747
0	0	0	0	0.406109	0.948445	-0.0227141	0.00524872	-0.0207151	-0.00657647	0.00986218	-0.00747169	-0.0265393	-0.00923228	-0.00686544	0.0112406	0.0085093	-0.00397882	-0.0166067	0.00510465	-0.00611211	0.0121601	-0.0148267	-0.0136579	-0.0114581	-0.00333337	-0.00241291	-0.00589091	-0.00101726	-0.00369034	-0.00931793	0.0013343
0	0	0	0	0.406109	0.948445	-0.0227141	0.0503084	-0.0207151	-0.0118328	0.0350953	-0.00747169	-0.0265393	0.0585823	-0.0151024	0.0485442	0.0225133	-0.0233633	-0.0424885	0.0161595	-0.0146385	0.0334677	-0.0415133	-0.00144045	0.045428	0.0460209	0.0403796	-0.0425178	-0.0435646	0.0394966	-0.0434744	0.0266184
0	0	0	0	0.406109	0.948445	-0.0227141	0.00552582	-0.0207151	-0.00567803	0.0304772	-0.00747169	-0.0265393	0.0120813	-0.015241	0.0141451	0.00197935	-0.0114196	-0.0238717	0.00405945	-0.00604455	0.0163249	0.003119	-0.0227532	-0.0114581	-0.00801161	-0.009256	-0.00594263	0.00343337	-0.0109046	-0.00195591	0.00141616
0	0	0	0	0.406109	0.948445	-0.0227141	0.0101005	-0.0207151	-0.00887202	0.0231941	-0.00747169	-0.0265393	0.000233099	-0.00930376	0.016951	0.00876104	-0.00841934	-0.0224013	0.00676637	-0.00825409	0.0161904	-0.0157244	-0.0168894	-0.0114581	-0.00245771	-0.00280564	-0.00989749	-0.00236626	-0.00406233	-0.00804956	0.00281417
0	0	0	0	0.406109	0.948445	-0.0227141	0.00391592	-0.0207151	-0.00341056	0.0216477	-0.00747169	-0.0265393	0.00490356	-0.0124134	0.0112164	0.000360355	-0.0092782	-0.0197865	0.00275216	-0.00492471	0.0123406	0.00289637	-0.0222698	-0.0114581	-0.00824205	-0.0091397	-0.00629875	0.00322106	-0.0106419	-0.00245079	0.00110527
0	0	0	0	0.406109	0.948445	-0.0227141	0.0465508	-0.0207151	-0.0118328	-0.00463599	-0.00747169	-0.0265393	0.00994464	0.000583557	0.02836	0.0173758	-0.0101796	-0.0215733	0.0155354	-0.015472	0.0191497	-0.0415133	0.0284932	0.0473045	0.0492289	0.0530225	-0.0313532	-0.0467687	0.0532439	-0.0543677	0.0219265
0	0	0	0	0.406109	0.948445	-0.0227141	0.0433854	-0.0207151	-0.0118328	0.0428358	-0.00747169	-0.0265393	0.0488189	-0.0181497	0.0439667	0.0169551	-0.0279687	-0.0428444	0.0141938	-0.0157766	0.0336125	-0.0415133	0.00790418	0.0469147	0.0462871	0.0429274	-0.0328586	-0.0417774	0.0426418	-0.0433465	0.0268739
0	0	0	0	0.406109	0.948445	-0.0227141	-0.00689494	-0.0207151	-0.00140972	-0.016164	-0.00747169	-0.0138624	-0.017536	-0.000354335	-0.000942198	-0.00348817	-0.00140727	-0.00190075	-0.000332161	-0.000590779	-4.39094e-05	0.00491206	-0.0201646	-0.0114581	-0.00991336	-0.00958631	-0.00440292	0.00439088	-0.0111864	-0.00223861	-0.000542745
0	0	0	0	0.406109	0.948445	-0.0227141	0.00487552	-0.0207151	-0.00479689	0.0241998	-0.00747169	-0.0265393	0.00234893	-0.0115705	0.0136247	0.00328913	-0.0102814	-0.0208535	0.00395964	-0.00561058	0.0136597	-0.00261686	-0.0198747	-0.0114581	-0.00668643	-0.00711394	-0.00601864	0.00193375	-0.00851201	-0.00441558	0.00144933
0	0	0	0	0.406109	0.948445	-0.0227141	0.0149831	-0.0207151	-0.00750151	0.0415924	-0.00747169	-0.0265393	0.0210623	-0.0176378	0.0204713	0.0057474	-0.013027	-0.0307853	0.00623428	-0.00918541	0.0206089	-0.0130587	-0.0193098	-0.0103069	-0.00163853	-0.00326841	-0.00894395	-0.00162975	-0.0047675	-0.00602785	0.00468227
0	0	0	0	0.406109	0.948445	-0.0227141	0.00980448	-0.0207151	-0.0059407	0.0341824	-0.00747169	-0.0265393	0.0135417	-0.0143909	0.0169916	0.00293536	-0.012402	-0.0261138	0.00479282	-0.00674852	0.0156615	0.000292777	-0.0252383	-0.0114581	-0.00563462	-0.00831544	-0.00871603	0.00172863	-0.0101623	-0.00411335	0.00237583
0	0	0	0	0.406109	0.948445	-0.0227141	0.0155826	-0.0207151	-0.00936091	0.0436858	-0.00747169	-0.0265393	0.023425	-0.018394	0.0220365	0.00653545	-0.0144209	-0.0321093	0.00715978	-0.00977079	0.0230941	-0.015831	-0.0187069	-0.00845548	-0.000387368	-0.00223169	-0.00890685	-0.00231773	-0.00370058	-0.00705205	0.0051541
0	0	0	0	0.406109	0.948445	-0.0227141	0.00943623	-0.0207151	-0.00936697	0.0443458	-0.00747169	-0.0265393	0.0184117	-0.0175851	0.0226488	0.00752669	-0.0171153	-0.0308028	0.00728371	-0.00903784	0.0240142	-0.00417788	-0.0209731	-0.0114581	-0.00583818	-0.00702619	-0.00712255	0.00132383	-0.00847752	-0.00474971	0.00189268
0	0	0	0	0.406109	0.948445	-0.0227141	0.117988	-0.0207151	-0.0118328	0.0141995	-0.00747169	-0.0265393	0.134889	-0.0127568	0.0889005	0.0563489	-0.0293927	-0.0588085	0.0255745	-0.00978058	0.0400666	-0.0415133	0.0570243	0.147052	0.136169	0.133943	-0.0936901	-0.123888	0.134673	-0.111243	0.0710754
0	0	0	0	0.406109	0.948445	-0.0227141	0.0334276	-0.0207151	-0.0118328	0.0389174	-0.00747169	-0.0265393	0.0345664	-0.0156347	0.0367751	0.01493	-0.0233209	-0.0374098	0.0126773	-0.0141785	0.029878	-0.0415133	0.00194937	0.0290966	0.0317342	0.0295404	-0.0253972	-0.0301032	0.029242	-0.0343995	0.0187509
0	0	0	0	0.406109	0.948445	-0.0227141	0.053729	-0.0207151	-0.0118328	0.00982247	-0.00747169	-0.0265393	0.031113	-0.0054167	0.039616	0.0194182	-0.0193487	-0.030843	0.0159414	-0.0161861	0.0255967	-0.0415133	0.0210832	0.061529	0.059983	0.0591005	-0.040895	-0.0550631	0.0589701	-0.0578756	0.0308368
0	0	0	0	0.406109	0.948445	-0.0227141	0.05508	-0.0207151	-0.0118328	0.04559	-0.00747169	-0.0265393	0.0657928	-0.0184705	0.0523732	0.0223359	-0.0279628	-0.0480989	0.0164269	-0.0153805	0.0350378	-0.0415133	0.00495706	0.05535	0.0546559	0.0494177	-0.0472513	-0.0511134	0.0490437	-0.0476792	0.0321075
0	0	0	0	0.406109	0.948445	-0.0227141	0.00646048	-0.0207151	-0.00443852	0.0270318	-0.00747169	-0.0265393	0.0108992	-0.0146604	0.01341	0.00150285	-0.0105181	-0.0229441	0.00344524	-0.00600384	0.0147662	0.00100859	-0.0225826	-0.0114581	-0.00714395	-0.00836438	-0.00690984	0.00254925	-0.0100987	-0.00262457	0.00181895
0	0	0	0	0.406109	0.948445	-0.0227141	-0.00922725	-0.0207151	-0.00376376	-0.00537899	-0.00747169	-0.0211433	-0.0133154	-0.0059351	0.0012064	-0.00811768	-0.00941569	-0.00594378	-0.000843	-0.000501699	0.00416675	0.00817445	-0.022957	-0.0114581	-0.0104671	-0.0110007	-0.00487311	0.00504445	-0.0126754	-0.000336328	0.000249704
0	0	0	0	0.406109	0.948445	-0.0227141	-0.00997897	-0.0207151	-0.00369598	-0.00837757	-0.00747169	-0.0194899	-0.0151234	-0.00517187	0.000268696	-0.00890871	-0.00925708	-0.00458021	-0.00110436	-0.000193995	0.00325205	0.00907984	-0.0234907	-0.0114581	-0.0105247	-0.0112504	-0.00479832	0.00525608	-0.0129884	-0.000266565	0.000205503
0	0	0	0	0.406109	0.948445	-0.0227141	-0.0100648	-0.0207151	-0.00393027	-0.0073906	-0.00747169	-0.0201527	-0.0147981	-0.0052991	0.000689806	-0.00878639	-0.00969561	-0.00498082	-0.00104031	-0.000224062	0.00370416	0.00876763	-0.0231281	-0.0114581	-0.0105873	-0.0111781	-0.00471909	0.00522021	-0.0128534	-0.000257697	0.00017925
0	0	0	0	0.406109	0.948445	-0.0227141	0.00560613	-0.0207151	-0.00480442	0.0265345	-0.00747169	-0.0265393	0.009977	-0.014436	0.0132857	0.00120643	-0.0108133	-0.0223981	0.00352341	-0.00591174	0.0153396	0.000577245	-0.0216695	-0.0114581	-0.0074292	-0.00835576	-0.00639765	0.00267005	-0.00991579	-0.00243507	0.0017176
0	0	0	0	0.406109	0.948445	-0.0227141	0.0429842	-0.0207151	-0.0118328	0.0402253	-0.00747169	-0.0265393	0.0439414	-0.016039	0.0428219	0.0174819	-0.0266137	-0.0412527	0.0141084	-0.0150673	0.0309007	-0.0415133	0.00600848	0.0445331	0.0443847	0.0407043	-0.0328046	-0.0402452	0.0407462	-0.0431749	0.0251589
0	0	0	0	0.406109	0.948445	-0.0227141	0.00261769	-0.0207151	-0.00480722	0.0213588	-0.00747169	-0.0265393	0.00568988	-0.0130809	0.0116556	-0.000165683	-0.0111063	-0.019684	0.00296315	-0.00509895	0.0142894	0.00353917	-0.0219697	-0.0114581	-0.00876682	-0.00939872	-0.00562496	0.003657	-0.0110065	-0.00176776	0.000957878
0	0	0	0	0.406109	0.948445	-0.0227141	0.0191124	-0.0207151	-0.0118328	0.0262874	-0.00747169	-0.0265393	0.010034	-0.0104118	0.0246377	0.0134048	-0.0145139	-0.027496	0.0095681	-0.0104539	0.0208016	-0.0415133	-0.00599551	0.0107583	0.0158898	0.0143703	-0.0158608	-0.0164479	0.0138593	-0.0234837	0.0107317
0	0	0	0	0.406109	0.948445	-0.0227141	0.0259222	-0.0207151	-0.0118328	0.0350711	-0.00747169	-0.0265393	0.0251297	-0.0138922	0.029377	0.0108049	-0.0174086	-0.0323267	0.0108038	-0.0120141	0.025571	-0.0415133	-0.00985234	0.00654717	0.0139811	0.012228	-0.0204487	-0.0168156	0.0115214	-0.0212621	0.0107694
0	0	0	0	0.406109	0.948445	-0.0227141	0.0405568	-0.0207151	-0.0118328	0.00274312	-0.00747169	-0.0265393	0.0174865	-0.00269702	0.0293532	0.0208077	-0.0102317	-0.0251332	0.0148863	-0.0125623	0.0195215	-0.0415133	0.00906757	0.0301447	0.0360499	0.0368602	-0.0354967	-0.0387142	0.0368972	-0.0438394	0.0178105
0	0	0	0	0.406109	0.948445	-0.0227141	-0.0088967	-0.0207151	-0.00482523	-0.00405412	-0.00747169	-0.0228293	-0.0125048	-0.00588355	0.0027435	-0.00822387	-0.0113988	-0.00695088	-0.000318553	-0.000763783	0.00555928	0.00827576	-0.0230889	-0.0114581	-0.0104312	-0.0110182	-0.00489714	0.0050497	-0.0127167	-0.000324806	0.000273723
0	0	0	0	0.406109	0.948445	-0.0227141	0.00924142	-0.0207151	-0.0118328	-0.00429405	-0.00747169	-0.0265393	-0.017536	-0.000230639	0.0107655	0.00940647	-0.00186754	-0.0115939	0.00706158	-0.00817003	0.011114	-0.0415133	-0.00359643	-0.00686173	0.00336353	0.00698321	-0.0112275	-0.00934532	0.00610317	-0.0206642	0.001211
0	0	0	0	0.406109	0.948445	-0.0227141	0.0874604	-0.0207151	-0.0118328	0.0316538	-0.00747169	-0.0265393	0.0996531	-0.0173535	0.0718118	0.036176	-0.0330157	-0.054782	0.0211448	-0.0161014	0.040748	-0.0415133	0.0415119	0.113518	0.105072	0.102532	-0.0685702	-0.0938265	0.102946	-0.0870157	0.056046
0	1	1	1	0.406109	0.948445	-0.0208592	-0.019981	-0.0207151	-0.00194593	-0.0207441	-0.00747169	0.00632043	-0.017536	0.00932649	-0.0166176	0.0118768	0.0222954	0.00183322	0.00773235	-0.00848322	0.00110965	-0.0373882	0.0719394	-0.0114581	-0.0162634	0.00183262	0.0354691	0.0125979	0.00687683	-0.0512169	-0.057039
0	0	0	0	0.406109	0.948445	-0.0227141	0.0125234	-0.0207151	-0.0118328	0.0438748	-0.00747169	-0.0265393	0.0198703	-0.0169015	0.0250484	0.00878254	-0.0184432	-0.0317248	0.0083373	-0.00976737	0.0250856	-0.0203391	-0.017692	-0.00921992	-0.000357581	-0.00167697	-0.010656	-0.00369595	-0.00288991	-0.0094071	0.00420542
0	0	0	0	0.406109	0.948445	-0.0227141	0.0106574	-0.0207151	-0.0109543	0.039011	-0.00747169	-0.0265393	0.0145678	-0.0152435	0.0225809	0.00838503	-0.0160353	-0.0290251	0.00786682	-0.00914309	0.0231728	-0.0116296	-0.0197024	-0.0114581	-0.00346206	-0.00455384	-0.0088488	-0.000939582	-0.00608144	-0.00698778	0.00275333
0	0	0	0	0.406109	0.948445	-0.0227141	0.0283911	-0.0207151	-0.0118328	0.044278	-0.00747169	-0.0265393	0.0345429	-0.0173439	0.0350788	0.0134433	-0.0223544	-0.0377902	0.0116851	-0.0135469	0.0300125	-0.0415133	-0.00820026	0.0177713	0.0216762	0.0178664	-0.0221298	-0.0212854	0.0172088	-0.0249159	0.0149675
0	0	0	0	0.406109	0.948445	-0.0227141	0.0139357	-0.0207151	-0.0117554	0.048559	-0.00747169	-0.0265393	0.0229546	-0.018612	0.0260309	0.00953297	-0.0190541	-0.0339358	0.00856749	-0.0105759	0.0265573	-0.0209637	-0.017036	-0.00697819	0.000759081	-0.000921529	-0.00893231	-0.00343551	-0.00218743	-0.00928948	0.00500745
0	0	0	0	0.406109	0.948445	-0.0227141	0.0124259	-0.0207151	-0.00730855	0.0377481	-0.00747169	-0.0265393	0.0200289	-0.0173012	0.0193599	0.00465314	-0.012974	-0.0289715	0.00572762	-0.00815654	0.0205821	-0.00922455	-0.0212002	-0.0114581	-0.00315382	-0.00514177	-0.00884295	-0.000515123	-0.00670755	-0.00551984	0.00378575
0	1	0	0	0.406109	0.948445	-0.0227141	-0.0136549	-0.0207151	-0.0037062	-0.0147902	-0.00747169	-0.0146294	-0.017536	-0.00155833	-0.00125933	-0.00950874	-0.00941045	-0.00127983	-0.00150029	0.0011744	0.00036028	0.0117731	-0.0239911	-0.0114581	-0.0111203	-0.0119017	-0.00400319	0.00602815	-0.0136353	-0.000283934	-0.000317902
0	0	0	0	0.406109	0.948445	-0.0227141	-0.0116834	-0.0207151	-0.0047074	-0.0103158	-0.00747169	-0.0192849	-0.0169519	-0.00422446	0.00051452	-0.00995489	-0.0112246	-0.00381541	-0.00112352	0.000218468	0.00360899	0.00971648	-0.0234569	-0.0114581	-0.0107409	-0.0114441	-0.00444823	0.00550825	-0.0131527	-0.000127891	8.15238e-05
0	0	0	0	0.406109	0.948445	-0.0227141	0.00393606	-0.0207151	-0.00455056	-0.0114191	-0.00747169	-0.0217484	-0.017536	-0.000133854	0.00413475	0.00283964	0.000657972	-0.00664384	0.00353213	-0.00399642	0.0045572	-0.0132498	-0.0161494	-0.0114581	-0.00494024	-0.0040316	-0.0101647	-0.00167409	-0.0053008	-0.00834909	0.000755639
0	0	0	0	0.406109	0.948445	-0.0227141	0.00412959	-0.0207151	-0.00982589	-0.00499814	-0.00747169	-0.0265393	-0.017536	0.000230179	0.00758225	0.00781486	0.000585856	-0.00934684	0.00608119	-0.00728549	0.00942435	-0.0268892	-0.00164593	-0.0114581	-0.00492108	0.0013624	-0.00475407	-0.00285481	0.000492877	-0.016123	-0.00413624
0	0	0	0	0.406109	0.948445	-0.0227141	0.00589057	-0.0207151	-0.00424864	0.0295947	-0.00747169	-0.0265393	0.0115748	-0.0152791	0.0135444	0.00218385	-0.00994426	-0.0236236	0.00356196	-0.0061019	0.0157993	0.00449471	-0.0226833	-0.0114581	-0.00828487	-0.00947993	-0.00508089	0.00396971	-0.0111632	-0.00164855	0.00128875
0	1	1	1	0.406109	0.948445	-0.0227141	-0.00489598	-0.0207151	3.75752e-05	-0.0127795	-0.00747169	-0.0145695	-0.017536	0.000194003	-0.000552601	0.0016949	0.00351711	-0.00364246	0.00118542	-0.00127589	0.000761403	0.00461031	-0.0169172	-0.0114581	-0.0110969	-0.00929355	-0.00260413	0.00495159	-0.0105173	-0.00508526	-0.00324504
0	0	0	0	0.406109	0.948445	-0.0227141	0.0358691	-0.0207151	-0.0118328	0.0469232	-0.00747169	-0.0265393	0.0425227	-0.0188406	0.0400875	0.0149871	-0.027014	-0.0415911	0.0132482	-0.0151062	0.0327681	-0.0415133	0.00179361	0.0356711	0.0361903	0.0326446	-0.0263092	-0.0322722	0.0321821	-0.0346791	0.0222023
0	0	0	0	0.406109	0.948445	-0.0227141	0.0204013	-0.0207151	-0.0118328	0.0488663	-0.00747169	-0.0265393	0.0289173	-0.0187988	0.0307698	0.0111858	-0.0222331	-0.0366511	0.0100876	-0.0121652	0.0288717	-0.0415133	-0.0117967	0.00515993	0.0108352	0.0082837	-0.0142019	-0.0118234	0.00743232	-0.0173333	0.0093997
0	0	0	0	0.406109	0.948445	-0.0227141	0.0480227	-0.0207151	-0.0118328	0.0450626	-0.00747169	-0.0265393	0.0577948	-0.019248	0.048222	0.0199131	-0.0284227	-0.0457649	0.0155429	-0.0163537	0.0357828	-0.0415133	0.00542806	0.0495971	0.0485983	0.0441687	-0.037279	-0.0440945	0.0435599	-0.0441614	0.0282216
0	0	0	0	0.406109	0.948445	-0.0227141	-5.44227e-05	-0.0207151	-0.0058928	0.0159914	-0.00747169	-0.0265393	0.00170228	-0.0112041	0.00947803	-0.00227789	-0.0116686	-0.0167903	0.00248691	-0.00415098	0.0119676	0.00423483	-0.0232337	-0.0114581	-0.00881455	-0.00989994	-0.00649872	0.0036183	-0.0115711	-0.00137887	0.0010687
0	0	0	0	0.406109	0.948445	-0.0227141	0.0053531	-0.0207151	-0.00444296	0.0195043	-0.00747169	-0.0265393	-0.00434873	-0.00872478	0.0121471	0.0040934	-0.00677068	-0.0183243	0.00421572	-0.00541783	0.0116304	-0.00519413	-0.0178169	-0.0114581	-0.00550706	-0.00601857	-0.00513278	0.00168677	-0.007339	-0.00530059	0.00114711
0	0	0	0	0.406109	0.948445	-0.0227141	0.0133814	-0.0207151	-0.0110841	0.0513519	-0.00747169	-0.0265393	0.024247	-0.0194166	0.0259872	0.00949594	-0.0189663	-0.0348459	0.00849793	-0.0105307	0.0268502	-0.0145176	-0.0186525	-0.00973846	-0.00148967	-0.00315195	-0.00818056	-0.00161931	-0.00449734	-0.00733516	0.00410948
0	0	0	0	0.406109	0.948445	-0.0227141	0.111997	-0.0207151	-0.0118328	0.016707	-0.00747169	-0.0265393	0.131524	-0.0139791	0.0864417	0.0536779	-0.0296843	-0.0583633	0.0244062	-0.00963262	0.0400279	-0.0415133	0.0509137	0.138644	0.128859	0.125865	-0.0908483	-0.11752	0.126502	-0.105263	0.0677644
0	0	0	0	0.406109	0.948445	-0.0227141	0.0332964	-0.0207151	-0.0118328	0.0334127	-0.00747169	-0.0265393	0.0254807	-0.0123811	0.0311847	0.0111183	-0.018427	-0.0330527	0.011308	-0.0125537	0.0236947	-0.0415133	-0.00195915	0.0241419	0.0276646	0.0250987	-0.0237041	-0.0263097	0.0246249	-0.0297472	0.0179574
0	0	0	0	0.406109	0.948445	-0.0227141	0.0124113	-0.0207151	-0.0112219	0.048261	-0.00747169	-0.0265393	0.0239804	-0.0193678	0.0247919	0.00988816	-0.0171351	-0.0338777	0.00834205	-0.0102562	0.0268846	-0.0109045	-0.0204555	-0.0107974	-0.00260931	-0.00455159	-0.00832637	-0.000772479	-0.00608837	-0.00664897	0.00349483
0	0	0	0	0.406109	0.948445	-0.0227141	0.0124001	-0.0207151	-0.0113009	0.0413992	-0.00747169	-0.0265393	0.0170874	-0.016245	0.0240886	0.0100189	-0.0165679	-0.0309083	0.00824856	-0.00999938	0.024613	-0.0199106	-0.0168476	-0.00843643	-0.000256233	-0.00142748	-0.00841978	-0.00290286	-0.00275933	-0.00962831	0.00409027
0	0	0	0	0.406109	0.948445	-0.0227141	0.0750363	-0.0207151	-0.0118328	-0.0106148	-0.00747169	-0.0265393	0.0448682	0.00307612	0.043553	0.0336262	-0.0106629	-0.0291334	0.0217296	-0.0146968	0.0228239	-0.0415133	0.0696517	0.0636094	0.0733348	0.0901714	-0.048373	-0.0781095	0.0928427	-0.0945418	0.02505
0	0	0	0	0.406109	0.948445	-0.0227141	0.0168615	-0.0207151	-0.0118328	0.0079727	-0.00747169	-0.0265393	-0.00459097	-0.00445587	0.0180142	0.0115936	-0.00788288	-0.0194353	0.00833903	-0.00945825	0.014988	-0.0415133	0.000331992	0.00611749	0.0137456	0.0153536	-0.0139373	-0.0162193	0.015181	-0.025555	0.0075886
0	0	0	0	0.406109	0.948445	-0.0227141	-0.00602676	-0.0207151	-0.00294499	0.000259616	-0.00747169	-0.0241722	-0.00854544	-0.00778841	0.00319535	-0.00618245	-0.00873368	-0.00902543	-0.000289868	-0.00144594	0.0059474	0.00757435	-0.0230282	-0.0114581	-0.0099848	-0.0106954	-0.00489935	0.00484117	-0.0124061	-0.000678082	0.000465889
0	0	0	0	0.406109	0.948445	-0.0227141	0.06532	-0.0207151	-0.0118328	0.00679272	-0.00747169	-0.0265393	0.0419968	-0.00322504	0.0445509	0.0242271	-0.0179194	-0.0322689	0.0192947	-0.0167473	0.0264511	-0.0415133	0.0233867	0.0652564	0.0658519	0.0654064	-0.0516348	-0.063102	0.0658216	-0.0619333	0.0346031
0	0	0	0	0.406109	0.948445	-0.0227141	0.0340021	0.0920189	0.101751	-0.0207441	-0.00747169	-0.0265393	0.155903	0.105051	0.102759	0.257012	0.021812	-0.0867805	0.115156	0.112839	0.0269805	-0.0415133	0.0655238	0.16157	0.160487	0.161425	-0.143369	-0.161207	0.162885	-0.164236	0.0656499
0	0	0	0	0.406109	0.948445	-0.0227141	0.031529	-0.0207151	-0.0118328	0.00790908	-0.00747169	-0.0265393	0.00711123	-0.00354243	0.0256876	0.0129717	-0.0116141	-0.022536	0.0117988	-0.0131683	0.0194701	-0.0415133	0.00186847	0.0235688	0.0283465	0.0274263	-0.0268882	-0.0290734	0.0270668	-0.0337441	0.0161218
0	0	0	0	0.406109	0.948445	-0.0227141	0.0169108	-0.0207151	-0.0118328	0.0491163	-0.00747169	-0.0265393	0.0260353	-0.0185615	0.0289566	0.0105764	-0.0213278	-0.0354324	0.00961747	-0.0113602	0.0278703	-0.0319517	-0.0164887	-0.00243001	0.00454586	0.00200591	-0.0127315	-0.00712241	0.000955377	-0.0125658	0.00652597
0	0	0	0	0.406109	0.948445	-0.0227141	-0.0108506	-0.0207151	-0.00369379	-0.00888623	-0.00747169	-0.019386	-0.0155587	-0.00512961	9.59326e-05	-0.00910993	-0.00956033	-0.00422739	-0.00124162	6.52407e-05	0.00323723	0.00884496	-0.0230264	-0.0114581	-0.010707	-0.0112085	-0.00461205	0.00528737	-0.0128855	-0.000297972	6.60447e-05
0	0	0	0	0.406109	0.948445	-0.0227141	0.0303535	-0.0207151	-0.0118328	0.0522509	-0.00747169	-0.0265393	0.0411875	-0.0197158	0.0381802	0.0143112	-0.0251836	-0.0416139	0.0126277	-0.0142168	0.0325038	-0.0415133	-0.0067903	0.0213778	0.0244221	0.0204268	-0.023049	-0.0232163	0.0198524	-0.0264281	0.0165965
0	0	0	0	0.406109	0.948445	-0.0227141	0.0102268	-0.0207151	-0.0106697	0.022412	-0.00747169	-0.0265393	0.000958634	-0.00872155	0.0182135	0.00935666	-0.0090853	-0.0223258	0.00736883	-0.00819561	0.0169389	-0.0147595	-0.0193535	-0.00972283	-0.00148922	-0.00315084	-0.0097726	-0.00216578	-0.00479252	-0.00962169	0.00259591
0	0	0	0	0.406109	0.948445	-0.0227141	0.0239591	-0.0207151	-0.0118328	0.0502883	-0.00747169	-0.0265393	0.0312753	-0.0182923	0.0326223	0.0132259	-0.0218539	-0.0384037	0.0110542	-0.0126169	0.0281056	-0.0415133	-0.011503	0.0124471	0.0164547	0.0126954	-0.018125	-0.0159809	0.0117554	-0.0196627	0.012927
0	0	0	0	0.406109	0.948445	-0.0227141	0.00938609	-0.0207151	-0.00912045	0.0446072	-0.00747169	-0.0265393	0.0197112	-0.0182095	0.0217398	0.00776657	-0.0154853	-0.0311866	0.00720381	-0.00916135	0.0242657	-0.00108574	-0.0218204	-0.0114581	-0.00693466	-0.00798196	-0.00720611	0.00203806	-0.00956226	-0.00342306	0.00163504
0	0	0	0	0.406109	0.948445	-0.0227141	0.0174855	-0.0207151	-0.0118328	0.0227065	-0.00747169	-0.0265393	0.00593	-0.00948048	0.0195814	0.00913574	-0.00968855	-0.0242443	0.00801655	-0.009382	0.01731	-0.0404879	-0.0125895	-0.00144397	0.00650787	0.00526702	-0.014664	-0.00978311	0.00420366	-0.0142774	0.00742396
0	0	0	0	0.406109	0.948445	-0.0227141	0.00537795	-0.0207151	-0.00588727	0.0326165	-0.00747169	-0.0265393	0.0102147	-0.0149402	0.016129	0.0029418	-0.0134806	-0.0246064	0.00453971	-0.00671228	0.0180115	0.00372057	-0.0216627	-0.0114581	-0.00877142	-0.00941203	-0.00495692	0.00389653	-0.0109576	-0.00201531	0.000759593
0	0	0	0	0.406109	0.948445	-0.0227141	0.0468816	-0.0207151	-0.0118328	0.0257722	-0.00747169	-0.0265393	0.0380475	-0.0112372	0.0408331	0.0202622	-0.0220433	-0.0369634	0.014811	-0.01464	0.0275291	-0.0415133	0.0147165	0.0540362	0.0530288	0.0509967	-0.0359457	-0.0481295	0.0510168	-0.0518574	0.0286603
0	0	0	0	0.406109	0.948445	-0.0227141	0.0282233	-0.0207151	-0.0118328	0.0552588	-0.00747169	-0.0265393	0.0424235	-0.0211094	0.0379531	0.0149526	-0.0249603	-0.0424146	0.0127295	-0.0143079	0.0334808	-0.0415133	-0.0128872	0.01477	0.018573	0.0139665	-0.0225455	-0.0187234	0.0129012	-0.0211324	0.013898
0	0	0	0	0.406109	0.948445	-0.0227141	0.0266853	-0.0207151	-0.0118328	-0.00781603	-0.00747169	-0.0265393	-0.00205113	0.00300116	0.0160211	0.0216134	0.00400689	-0.0169708	0.0132719	-0.00956009	0.0127674	-0.0415133	-0.00438257	0.0103577	0.016611	0.0156073	-0.020256	-0.0186811	0.0157707	-0.0382137	0.00220189
0	0	0	0	0.406109	0.948445	-0.0227141	-0.0125394	-0.0207151	-0.00476007	-0.0115369	-0.00747169	-0.0185103	-0.017536	-0.00385754	4.28948e-05	-0.0104014	-0.011381	-0.00313103	-0.00126473	0.00053442	0.00309987	0.0103126	-0.0236734	-0.0114581	-0.0108133	-0.0116103	-0.0042874	0.00568693	-0.0133261	-5.6842e-05	3.09726e-05
0	0	0	0	0.406109	0.948445	-0.0227141	0.0745292	-0.0207151	-0.0118328	0.0245555	-0.00747169	-0.0265393	0.0780102	-0.0133625	0.0604524	0.0312963	-0.0274199	-0.0468533	0.0198834	-0.0156001	0.0357571	-0.0415133	0.0267053	0.0904557	0.0844989	0.0805212	-0.0582454	-0.0754977	0.0807137	-0.0729182	0.0445541
0	1	0	1	0.406109	0.948445	-0.0227141	-0.0133269	-0.0207151	-0.00420221	-0.0141981	-0.00747169	-0.0165911	-0.017536	-0.00313259	-0.00104638	-0.0110076	-0.0106206	-0.00180036	-0.00176389	0.000905566	0.0020555	0.0104695	-0.0235996	-0.0114581	-0.0109048	-0.0116247	-0.00417704	0.00575317	-0.0133614	-1.83895e-06	-7.07591e-06
0	0	0	0	0.406109	0.948445	-0.0227141	0.00662144	-0.0207151	-0.00651533	0.0339617	-0.00747169	-0.0265393	0.0115299	-0.0152812	0.0171416	0.00364651	-0.0138491	-0.0255939	0.00502074	-0.00718005	0.0189674	0.000844336	-0.0210625	-0.0114581	-0.00787806	-0.00851031	-0.00567392	0.00298175	-0.00999156	-0.00285858	0.00111352
0	0	0	0	0.406109	0.948445	-0.0227141	0.0319455	-0.0207151	-0.0118328	0.0365357	-0.00747169	-0.0265393	0.0344205	-0.0148327	0.036217	0.0147686	-0.0217436	-0.0362036	0.0122428	-0.0133003	0.0289556	-0.0415133	-0.00415119	0.0274626	0.0296348	0.0258549	-0.0260063	-0.0279118	0.024981	-0.0319663	0.0182015
0	0	0	0	0.406109	0.948445	-0.0227141	0.00978234	-0.0207151	-0.00740624	0.0299697	-0.00747169	-0.0265393	0.00916123	-0.0133814	0.0181466	0.00554769	-0.0122544	-0.0248657	0.00588381	-0.00770628	0.018949	-0.011924	-0.0178338	-0.0114581	-0.00373537	-0.0040782	-0.00767977	-0.000721756	-0.00546113	-0.00662781	0.00285278
0	0	0	0	0.406109	0.948445	-0.0227141	0.00924492	-0.0207151	-0.00733419	0.0322505	-0.00747169	-0.0265393	0.00901977	-0.0131778	0.0179171	0.00555883	-0.0122215	-0.0254684	0.00573687	-0.00719436	0.0171687	-0.00940878	-0.0202503	-0.0114581	-0.00337427	-0.00468556	-0.0089189	-0.00074827	-0.00616418	-0.00661281	0.00303765
0	0	0	0	0.406109	0.948445	-0.0227141	0.125831	-0.0207151	-0.0118328	-0.0148593	-0.00747169	-0.0265393	0.10957	0.00272501	0.0772312	0.0571243	-0.0182541	-0.0425755	0.0301154	-0.0131164	0.031777	-0.0415133	0.072128	0.138156	0.132625	0.137349	-0.0919564	-0.1252	0.138829	-0.1179	0.0640303
0	0	0	0	0.406109	0.948445	-0.0227141	0.0395039	-0.0207151	-0.0118328	0.039643	-0.00747169	-0.0265393	0.0428762	-0.0159341	0.0410235	0.0164326	-0.0242313	-0.039772	0.0140364	-0.0148737	0.0315381	-0.0415133	0.000894912	0.0325066	0.0356263	0.0328876	-0.0329177	-0.0351577	0.0325532	-0.036287	0.0214868
0	1	0	1	0.406109	0.948445	-0.0227141	-0.0143454	-0.0207151	-0.00329619	-0.0171602	-0.00747169	-0.012966	-0.017536	-0.00097815	-0.00215709	-0.0100869	-0.00882427	-9.53396e-05	-0.00196605	0.00147272	-0.000575796	0.0112714	-0.0233856	-0.0114581	-0.0112193	-0.0117191	-0.00386341	0.00597276	-0.0134128	-0.000227092	-0.000348874
0	0	0	0	0.406109	0.948445	-0.0227141	-0.00107888	-0.0207151	-0.000973952	-0.0127837	-0.00747169	-0.0170511	-0.017536	-0.000583168	0.00171472	-0.000186264	0.000895262	-0.00424303	0.000922441	-0.00231236	0.00204309	-0.0025649	-0.0170137	-0.0114581	-0.00765018	-0.00686937	-0.00486005	0.00247871	-0.00835097	-0.00431292	3.83534e-05
0	0	0	0	0.406109	0.948445	-0.0227141	0.0187807	-0.0207151	-0.0118328	0.0451756	-0.00747169	-0.0265393	0.0253836	-0.0180964	0.025808	0.00791801	-0.0173128	-0.0337813	0.00844624	-0.0108821	0.0251289	-0.0286564	-0.0162635	-0.00627062	0.00260286	0.00118765	-0.0132611	-0.00651503	-1.90165e-06	-0.0103087	0.0063667
0	0	0	0	0.406109	0.948445	-0.0227141	0.0465754	-0.0207151	-0.0118328	0.0207271	-0.00747169	-0.0265393	0.0324331	-0.00901353	0.0385249	0.0190734	-0.0202393	-0.0342925	0.0145551	-0.0145282	0.0256253	-0.0415133	0.0207008	0.047829	0.0498036	0.0509291	-0.0348168	-0.0479122	0.0514005	-0.0534453	0.0250126
0	0	0	0	0.406109	0.948445	-0.0227141	0.012728	-0.0207151	-0.0112634	0.0505476	-0.00747169	-0.0265393	0.0241507	-0.0192781	0.0257866	0.00922834	-0.0187628	-0.0343961	0.00844028	-0.010341	0.0265709	-0.0111192	-0.0202554	-0.0114581	-0.00343194	-0.00484679	-0.00946012	-0.00102735	-0.00633167	-0.00605835	0.00324989
0	0	0	0	0.406109	0.948445	-0.0227141	0.110479	-0.0207151	-0.0118328	-0.00368781	-0.00747169	-0.0265393	0.0997802	-0.00278926	0.0714588	0.0502845	-0.0213114	-0.0451686	0.0266828	-0.0121085	0.0315412	-0.0415133	0.054135	0.127985	0.120626	0.120745	-0.0837635	-0.111365	0.121568	-0.103631	0.0614019
0	0	0	0	0.406109	0.948445	-0.0227141	0.0150948	-0.0207151	-0.0118328	0.0408557	-0.00747169	-0.0265393	0.0157455	-0.0144655	0.0257189	0.00996363	-0.0177687	-0.0309428	0.00863198	-0.0102439	0.0231181	-0.0345519	-0.0137437	-0.00278265	0.00482329	0.00331037	-0.0121995	-0.00763937	0.00239019	-0.0135171	0.00624774
0	0	0	0	0.406109	0.948445	-0.0227141	0.0652943	-0.0207151	-0.0118328	0.0156218	-0.00747169	-0.0265393	0.0541354	-0.0085331	0.0491381	0.027605	-0.0216014	-0.0387852	0.0186022	-0.0149024	0.0288869	-0.0415133	0.0178563	0.075718	0.0711733	0.0668079	-0.0520339	-0.0643636	0.0664579	-0.0629767	0.037962
0	0	0	0	0.406109	0.948445	-0.0227141	0.0135499	-0.0207151	-0.00790583	0.0367694	-0.00747169	-0.0265393	0.0154959	-0.0150859	0.0194839	0.00629395	-0.0125773	-0.0285057	0.00621882	-0.00811214	0.017941	-0.0188541	-0.0182264	-0.00777008	0.000532321	-0.00127275	-0.0105459	-0.00362376	-0.00250954	-0.00844124	0.0054337
0	0	0	0	0.406109	0.948445	-0.0227141	0.00187677	-0.0207151	-0.0047053	0.0225097	-0.00747169	-0.0265393	0.00656119	-0.0133211	0.0110502	-0.000225694	-0.01061	-0.0198164	0.00276961	-0.00456973	0.013475	0.00627953	-0.0235541	-0.0114581	-0.00887899	-0.0102242	-0.00519749	0.00438521	-0.0119469	-0.00135557	0.000972523
0	0	0	0	0.406109	0.948445	-0.0227141	0.0128477	-0.0207151	-0.0086247	0.0436918	-0.00747169	-0.0265393	0.0204226	-0.0179014	0.021808	0.00661249	-0.0150935	-0.0312019	0.00688064	-0.00925097	0.0228504	-0.00841975	-0.0198377	-0.0114581	-0.00398971	-0.00524542	-0.00767896	3.11066e-05	-0.00668329	-0.00547922	0.0030649
0	0	0	0	0.406109	0.948445	-0.0227141	0.000801993	-0.0207151	-0.00484539	0.0185918	-0.00747169	-0.0265393	0.00347642	-0.0124383	0.0103135	-0.00106707	-0.0110506	-0.0181835	0.00245711	-0.00458134	0.0132943	0.00507355	-0.0221654	-0.0114581	-0.00911817	-0.00977812	-0.00494005	0.0042073	-0.011428	-0.00139118	0.000784262
0	0	0	0	0.406109	0.948445	-0.0227141	0.00639264	-0.0207151	-0.00502383	0.0303485	-0.00747169	-0.0265393	0.012842	-0.0154922	0.0143405	0.00215821	-0.0110858	-0.0241283	0.00395644	-0.00607482	0.0162869	0.000238946	-0.0215198	-0.0114581	-0.00715551	-0.00812928	-0.00639708	0.00254018	-0.00964501	-0.00265974	0.00183479
0	0	0	0	0.406109	0.948445	-0.0227141	-0.00198112	-0.0207151	-0.00322034	0.00989892	-0.00747169	-0.0265393	-0.00186364	-0.0103608	0.0065512	-0.00338428	-0.00893526	-0.0138391	0.000920766	-0.00301282	0.00908235	0.00598734	-0.0223776	-0.0114581	-0.00941951	-0.0100817	-0.00489312	0.00444866	-0.0117253	-0.00098429	0.000743301
0	0	0	0	0.406109	0.948445	-0.0227141	0.0880579	-0.0207151	-0.0118328	0.0185576	-0.00747169	-0.0265393	0.0870538	-0.0116445	0.066207	0.037136	-0.0285763	-0.0486627	0.0217731	-0.0146948	0.034998	-0.0415133	0.0402921	0.111876	0.103521	0.100995	-0.069384	-0.0929926	0.101392	-0.0870023	0.0541259
0	1	1	1	0.406109	0.948445	0.00424952	-0.019981	0.00490621	0.000296474	-0.0207441	-0.00747169	0.00662838	-0.017536	0.00958235	-0.0127865	-0.0100063	0.00325304	0.0150015	-0.00422123	0.00460587	-0.0112372	0.012433	-0.0193923	-0.0114581	-0.0124554	-0.0113994	-0.00127383	0.0069761	-0.0130239	-0.00116152	-0.00264267
0	0	0	0	0.406109	0.948445	-0.0227141	0.0249359	-0.0207151	-0.0118328	0.0151281	-0.00747169	-0.0265393	0.0101455	-0.00666225	0.0251846	0.0141329	-0.0123209	-0.0251911	0.0108774	-0.011005	0.0194576	-0.0415133	0.00411254	0.0114514	0.0194506	0.0213507	-0.0203905	-0.02295	0.0214798	-0.0326099	0.00898082
0	0	0	0	0.406109	0.948445	-0.0227141	0.0311107	-0.0207151	-0.0118328	0.0474026	-0.00747169	-0.0265393	0.0365239	-0.017515	0.0373622	0.0144761	-0.0251708	-0.0398589	0.0122535	-0.0137349	0.0298133	-0.0415133	-0.00396846	0.0257996	0.0280587	0.0244258	-0.0245966	-0.026483	0.0238163	-0.0297522	0.0178632
0	0	0	0	0.406109	0.948445	-0.0227141	0.0140278	-0.0207151	-0.0118328	0.0460824	-0.00747169	-0.0265393	0.0217412	-0.0178195	0.0253298	0.00886476	-0.0184689	-0.0329017	0.00847198	-0.0102763	0.0255873	-0.0222111	-0.0172047	-0.00716026	0.00089937	-0.000651127	-0.0102893	-0.00413599	-0.00194966	-0.00939228	0.0051549
0	1	0	0	0.406109	0.948445	-0.0227141	-0.0129893	-0.0207151	-0.0043166	-0.0135238	-0.00747169	-0.0171131	-0.017536	-0.00337666	-0.000706621	-0.0108777	-0.0108415	-0.00216956	-0.00163088	0.000790778	0.00235145	0.0102489	-0.0235387	-0.0114581	-0.010892	-0.0115922	-0.00422885	0.00570062	-0.0133186	-4.2021e-05	-4.53959e-06
0	0	0	0	0.406109	0.948445	-0.0227141	0.0297103	-0.0207151	-0.0118328	0.0370422	-0.00747169	-0.0265393	0.02858	-0.0145557	0.0336879	0.0147035	-0.02104	-0.0354108	0.0118881	-0.01323	0.0268312	-0.0415133	-0.00351583	0.0206055	0.0246626	0.0220028	-0.0243974	-0.0250498	0.021537	-0.0289794	0.0153474
0	0	0	0	0.406109	0.948445	-0.0227141	0.0614763	-0.0207151	-0.0118328	0.0234486	-0.00747169	-0.0265393	0.0609056	-0.0112521	0.0507952	0.0282235	-0.0218392	-0.0416368	0.018305	-0.0139096	0.0306581	-0.0415133	0.010982	0.0598109	0.0596483	0.0556659	-0.0512119	-0.0572121	0.0555422	-0.0568355	0.0318249
0	0	0	0	0.406109	0.948445	-0.0227141	0.00495934	-0.0207151	-0.00739175	0.000897449	-0.00747169	-0.0265393	-0.017536	-0.00226622	0.0098147	0.00980129	-0.000887627	-0.0128035	0.00576582	-0.00640198	0.00982298	-0.0242266	-0.00817592	-0.0114581	-0.00188567	0.000353761	-0.00543211	-0.00272224	-0.000587627	-0.0132728	-9.40398e-05
0	0	0	0	0.406109	0.948445	-0.0227141	-0.0122741	-0.0207151	-0.00471871	-0.0116824	-0.00747169	-0.0183743	-0.017536	-0.00379113	4.00682e-05	-0.0104071	-0.0112155	-0.00307005	-0.00128355	0.000437452	0.00306704	0.0101927	-0.023594	-0.0114581	-0.0108142	-0.011565	-0.00430195	0.00565589	-0.013286	-5.55243e-05	3.96362e-05
0	1	1	1	0.406109	0.948445	-0.0226497	-0.0152894	-0.0207151	-0.00272067	-0.020726	-0.00747169	-0.0100853	-0.017536	0.000174525	-0.00363527	-0.0113499	-0.00823408	0.0017332	-0.00254027	0.00180023	-0.00212624	0.0120949	-0.0237655	-0.0114581	-0.0112116	-0.0119139	-0.0036953	0.00617653	-0.0136676	-0.000136233	-0.000424136
0	1	0	0	0.406109	0.948445	-0.0227141	-0.0124837	-0.0207151	-0.0039233	-0.0125234	-0.00747169	-0.0172404	-0.017536	-0.00380933	-0.00112734	-0.0102714	-0.00965975	-0.00235278	-0.00166443	0.000615386	0.00199976	0.0100066	-0.0234161	-0.0114581	-0.0108228	-0.0114766	-0.00430395	0.00561173	-0.0131939	-7.66168e-05	2.77089e-05
0	1	1	1	0.406109	0.948445	-0.000999173	-0.019981	0.003057	-0.000929481	-0.0207441	-0.00701418	0.00192666	-0.017536	0.00635211	-0.01102	-0.00943794	0.000187627	0.0118537	-0.00400687	0.00425891	-0.00858003	0.0118085	-0.0208369	-0.0114581	-0.0116017	-0.0112536	-0.00233324	0.00645762	-0.0130006	-0.00071577	-0.00152587
0	0	0	0	0.406109	0.948445	-0.0227141	0.0183478	-0.0207151	-0.0118328	0.0370182	-0.00747169	-0.0265393	0.0198769	-0.0138144	0.0274251	0.0113976	-0.0161811	-0.0311146	0.00982253	-0.0109367	0.024981	-0.0415133	-0.0150528	0.0011199	0.0080284	0.00552719	-0.0163685	-0.0107681	0.00424708	-0.0163013	0.00757193
0	0	0	0	0.406109	0.948445	-0.0227141	0.0554225	-0.0207151	-0.0118328	0.0122029	-0.00747169	-0.0265393	0.0361122	-0.00589686	0.0397189	0.021245	-0.0180307	-0.0329213	0.0165535	-0.0144426	0.0246865	-0.0415133	0.0270089	0.0522599	0.0561156	0.0593178	-0.0430658	-0.05643	0.059965	-0.0599606	0.0278666
0	0	0	0	0.406109	0.948445	-0.0227141	0.0518704	-0.0207151	-0.0118328	0.0216716	-0.00747169	-0.0265393	0.039227	-0.00995361	0.0417925	0.0204564	-0.0219621	-0.036395	0.015534	-0.0151258	0.0272939	-0.0415133	0.0165921	0.057925	0.0568086	0.0546683	-0.0403272	-0.0524027	0.054706	-0.0537664	0.0306685
0	0	0	0	0.406109	0.948445	-0.0227141	0.0163816	-0.0207151	-0.0118328	0.0516421	-0.00747169	-0.0265393	0.0271417	-0.0192672	0.0278731	0.00984603	-0.0192833	-0.0359387	0.00909612	-0.0110331	0.0273822	-0.0226714	-0.018771	-0.00541455	0.00202959	-0.000562845	-0.01132	-0.00461472	-0.00189202	-0.0097886	0.00587727
0	0	0	0	0.406109	0.948445	-0.0227141	-0.00276923	-0.0207151	-0.00452399	0.00865841	-0.00747169	-0.0265393	-0.00260461	-0.00981906	0.00659422	-0.00404103	-0.0103824	-0.0132791	0.00126347	-0.00293765	0.0094441	0.00655189	-0.0231855	-0.0114581	-0.00946977	-0.0103727	-0.00549044	0.00439584	-0.0120622	-0.00106195	0.000672046
0	0	0	0	0.406109	0.948445	-0.0227141	0.0197748	-0.0207151	-0.0118328	-0.00553813	-0.00747169	-0.0265393	-0.0146138	0.000611335	0.0135174	0.00995434	-0.00297235	-0.0133961	0.00983102	-0.0105159	0.0124818	-0.0415133	0.0168899	0.00308302	0.0141977	0.0221079	-0.0133776	-0.0201127	0.0222788	-0.0326918	0.00322548
0	0	0	0	0.406109	0.948445	-0.0227141	0.0485414	-0.0207151	-0.0118328	0.0400034	-0.00747169	-0.0265393	0.0571808	-0.0170987	0.0482077	0.0212666	-0.0257673	-0.0439387	0.01571	-0.0154165	0.0343792	-0.0415133	0.0039595	0.048449	0.0486321	0.0442782	-0.0415879	-0.0458049	0.0436877	-0.0447687	0.0282104
0	1	0	1	0.406109	0.948445	-0.0227141	-0.0143454	-0.0207151	-0.00329619	-0.0171602	-0.00747169	-0.012966	-0.017536	-0.00097815	-0.00215709	-0.0100869	-0.00882427	-9.53396e-05	-0.00196605	0.00147272	-0.000575796	0.0112714	-0.0233856	-0.0114581	-0.0112193	-0.0117191	-0.00386341	0.00597276	-0.0134128	-0.000227092	-0.000348874
0	0	0	0	0.406109	0.948445	-0.0227141	0.0171699	-0.0207151	-0.0118328	0.0482024	-0.00747169	-0.0265393	0.0244797	-0.0181098	0.0272845	0.011228	-0.0180111	-0.0351822	0.00925455	-0.0112864	0.0262291	-0.0281088	-0.017581	-0.00135186	0.00477273	0.00174835	-0.0114387	-0.00611976	0.000432403	-0.0114253	0.0071673
0	0	0	0	0.406109	0.948445	-0.0227141	0.0486544	-0.0207151	-0.0118328	0.0456802	-0.00747169	-0.0265393	0.0591052	-0.0193475	0.0490915	0.0203397	-0.0286768	-0.0461834	0.0159387	-0.0164672	0.0361628	-0.0415133	0.00434442	0.0500824	0.048994	0.0442182	-0.0388625	-0.0445765	0.0436098	-0.0437423	0.0286797
0	1	1	1	0.406109	0.948445	-0.000999173	-0.019981	0.003057	-0.000929481	-0.0207441	-0.00701418	0.00192666	-0.017536	0.00635211	-0.01102	-0.00943794	0.000187627	0.0118537	-0.00400687	0.00425891	-0.00858003	0.0118085	-0.0208369	-0.0114581	-0.0116017	-0.0112536	-0.00233324	0.00645762	-0.0130006	-0.00071577	-0.00152587
0	0	0	0	0.406109	0.948445	-0.0227141	0.0475256	-0.0207151	-0.0118328	0.0464741	-0.00747169	-0.0265393	0.0599084	-0.0191529	0.0489088	0.0205353	-0.0265968	-0.0460181	0.0158005	-0.0158648	0.0359988	-0.0415133	-0.00184809	0.0439659	0.0438904	0.0380724	-0.038799	-0.0405383	0.0372556	-0.039681	0.0265869
0	0	0	0	0.406109	0.948445	-0.0227141	-0.00722184	-0.0207151	-0.00524635	0.000559121	-0.00747169	-0.025819	-0.00952936	-0.00703031	0.00442479	-0.00690389	-0.0118604	-0.00924131	0.000366385	-0.00154275	0.00727465	0.00790237	-0.0230157	-0.0114581	-0.0101981	-0.0108332	-0.00491203	0.00493026	-0.0125245	-0.000494351	0.000356935
0	0	0	0	0.406109	0.948445	-0.0227141	-0.0110024	-0.0207151	-0.00317607	-0.00798156	-0.00747169	-0.0182022	-0.0166783	-0.00459024	0.000144183	-0.00960641	-0.010166	-0.00422819	-0.00150029	0.000208697	0.00223802	0.00971816	-0.0235865	-0.0114581	-0.0107372	-0.0114605	-0.00458838	0.00546788	-0.0131692	-0.00028809	2.79757e-05
0	0	0	0	0.406109	0.948445	-0.0227141	0.0432808	-0.0207151	-0.0118328	0.0163907	-0.00747169	-0.0265393	0.0272736	-0.00766982	0.0355728	0.0183683	-0.0183149	-0.0314903	0.0140665	-0.0137706	0.0239247	-0.0415133	0.0123822	0.045339	0.046233	0.0451707	-0.0333813	-0.0432404	0.0451031	-0.0479379	0.0242575
0	0	0	0	0.406109	0.948445	-0.0227141	0.00671835	-0.0207151	-0.00483153	0.0307891	-0.00747169	-0.0265393	0.0117077	-0.0154223	0.0150966	0.00235243	-0.0119512	-0.0243882	0.0039605	-0.00658158	0.0168085	5.94769e-05	-0.0209515	-0.0114581	-0.00738375	-0.00808694	-0.00567359	0.00275922	-0.00964448	-0.00279074	0.00156561
0	0	0	0	0.406109	0.948445	-0.0227141	0.0339083	-0.0207151	-0.0118328	0.0130905	-0.00747169	-0.0265393	0.0175396	-0.00607466	0.0299742	0.0180352	-0.0133298	-0.0275592	0.0130316	-0.0121561	0.0210803	-0.0415133	0.0055032	0.0307291	0.0336396	0.0324645	-0.028819	-0.0334721	0.0321033	-0.0402483	0.0166883
0	0	0	0	0.406109	0.948445	-0.0227141	0.0196136	-0.0207151	-0.0118328	0.0499941	-0.00747169	-0.0265393	0.028979	-0.0191389	0.0301275	0.0116616	-0.0210495	-0.0369065	0.0101477	-0.0121586	0.0288272	-0.0389996	-0.0158514	0.002115	0.00791127	0.0047354	-0.0143723	-0.00946766	0.00358529	-0.0141349	0.00843566
0	0	0	0	0.406109	0.948445	-0.0227141	0.0112231	-0.0207151	-0.00725278	0.0453354	-0.00747169	-0.0265393	0.0195818	-0.0181378	0.0210282	0.00668371	-0.014415	-0.0311556	0.0064239	-0.00885419	0.0224353	-0.00144578	-0.0213461	-0.0114581	-0.00614194	-0.00749742	-0.00586071	0.00227208	-0.00905507	-0.00362544	0.00205632
0	0	0	0	0.406109	0.948445	-0.0227141	0.00425141	-0.0207151	-0.00437838	0.0183479	-0.00747169	-0.0265393	0.00362184	-0.0109988	0.011202	-0.00135549	-0.0110058	-0.0184739	0.0027344	-0.00469374	0.0112641	0.00152489	-0.0242346	-0.0114581	-0.00743115	-0.00903308	-0.00880612	0.00214469	-0.0107998	-0.00291909	0.00163091
0	0	0	0	0.406109	0.948445	-0.0227141	-0.0033449	-0.0207151	-0.00535674	0.00847825	-0.00747169	-0.0265393	-0.00400587	-0.00915811	0.00656075	-0.0043562	-0.0110384	-0.0128921	0.00138938	-0.00292788	0.00925627	0.00577018	-0.0232126	-0.0114581	-0.00929562	-0.0103093	-0.0057491	0.00420012	-0.011958	-0.00105407	0.000794979
0	0	0	0	0.406109	0.948445	-0.0227141	0.0348414	-0.0207151	-0.0118328	0.0448679	-0.00747169	-0.0265393	0.0419747	-0.0175894	0.0348558	0.0117041	-0.0199002	-0.0392691	0.0111459	-0.0120646	0.0266499	-0.0415133	-0.0131631	0.0187904	0.0227417	0.017509	-0.0266981	-0.022257	0.0163839	-0.0240623	0.0164072
0	0	0	0	0.406109	0.948445	-0.0227141	0.00100175	-0.0207151	-0.00682038	-0.0111882	-0.00747169	-0.0216517	-0.017536	0.00187891	0.00309419	0.0127788	0.00741974	-0.00804128	0.00645167	-0.00626737	0.00619912	-0.0327729	0.00615691	-0.0114581	-0.0024243	0.00387383	0.000186661	-0.00284119	0.0042581	-0.0228106	-0.00793496
0	0	0	0	0.406109	0.948445	-0.0227141	-0.00400218	-0.0207151	-0.0039917	0.00387017	-0.00747169	-0.0265393	-0.00969978	-0.00695654	0.00532015	-0.00401672	-0.00907088	-0.0104884	0.00104178	-0.00230262	0.00701929	0.00551526	-0.0223672	-0.0114581	-0.00958745	-0.00995289	-0.00571593	0.00407689	-0.0116272	-0.00161378	0.000373147
0	0	0	0	0.406109	0.948445	-0.0227141	-0.00368152	-0.0207151	-0.00302056	0.00581178	-0.00747169	-0.0265393	-0.00432327	-0.00943778	0.00514645	-0.00464795	-0.00891735	-0.0118375	0.000364784	-0.00231153	0.00775599	0.00644802	-0.0224961	-0.0114581	-0.0096487	-0.0102843	-0.00489204	0.00457383	-0.0119282	-0.000848255	0.000654859
0	0	0	0	0.406109	0.948445	-0.0227141	0.00833409	-0.0207151	-0.0118139	-0.00521318	-0.00747169	-0.0265393	-0.017536	-0.000422139	0.0102033	0.00912404	-0.00201153	-0.0109907	0.00663882	-0.00805992	0.0107255	-0.0415133	0.00246689	-0.00633704	0.00394595	0.00900124	-0.00752633	-0.00926656	0.0085191	-0.0220075	0.000563562
0	0	0	0	0.406109	0.948445	-0.0227141	-0.00774289	-0.0207151	-0.00341159	-0.00277246	-0.00747169	-0.0224732	-0.0110913	-0.00679661	0.00212597	-0.0072339	-0.00909574	-0.00740656	-0.000556892	-0.000976609	0.0049669	0.00783236	-0.0227718	-0.0114581	-0.0102401	-0.010772	-0.00485278	0.00493038	-0.0124262	-0.000464315	0.000344788
0	0	0	0	0.406109	0.948445	-0.0227141	0.0405351	-0.0207151	-0.0118328	0.0467973	-0.00747169	-0.0265393	0.0465416	-0.0179405	0.0432047	0.0169104	-0.0273768	-0.0430262	0.0137594	-0.014933	0.0320411	-0.0415133	0.00293059	0.039286	0.0401882	0.0363986	-0.0320135	-0.0372139	0.0362121	-0.038953	0.0238504
0	0	0	0	0.406109	0.948445	-0.0227141	0.0372847	-0.0207151	-0.0118328	0.0480801	-0.00747169	-0.0265393	0.0435622	-0.0182678	0.0413718	0.0157977	-0.0271224	-0.0423109	0.0131717	-0.0146822	0.0315905	-0.0415133	0.00138713	0.034392	0.036013	0.0325717	-0.0292527	-0.0336816	0.032283	-0.0358238	0.0218744
0	0	0	0	0.406109	0.948445	-0.0227141	0.0502946	-0.0207151	-0.0118328	0.0398227	-0.00747169	-0.0265393	0.0541261	-0.0164292	0.048331	0.0209628	-0.0279351	-0.0441385	0.0155484	-0.0153647	0.0329053	-0.0415133	0.00782881	0.0576773	0.0547766	0.049624	-0.0396099	-0.048534	0.0492511	-0.0493925	0.0306907
0	0	0	0	0.406109	0.948445	-0.0227141	0.0138199	-0.0207151	-0.0070824	0.045978	-0.00747169	-0.0265393	0.0214682	-0.0184227	0.0215365	0.00659663	-0.0140574	-0.0322244	0.00632621	-0.00948493	0.0219388	-0.00813905	-0.0200869	-0.0114581	-0.0043334	-0.00557592	-0.00794994	0.000113239	-0.00703341	-0.00481411	0.00316913
0	0	0	0	0.406109	0.948445	-0.0227141	0.039114	-0.0207151	-0.0118328	0.0482339	-0.00747169	-0.0265393	0.0497897	-0.019058	0.0435028	0.0169912	-0.0264086	-0.0435071	0.0141201	-0.0150582	0.034048	-0.0415133	-0.00207503	0.0330242	0.0352593	0.0310666	-0.0325138	-0.0338187	0.0306766	-0.0346711	0.0217718
0	1	0	0	0.406109	0.948445	-0.0127984	-0.00980244	-0.0207151	-0.000656758	-0.0207441	-0.00747169	-0.0050503	-0.017536	0.00543655	-0.00546819	-0.00612328	0.00280567	0.00728962	-0.00155915	8.03547e-05	-0.00339046	0.00434214	-0.0163849	-0.0114581	-0.0116076	-0.0093035	-0.00279753	0.00492817	-0.0106838	-0.00323202	-0.00256053
0	0	0	0	0.406109	0.948445	-0.0227141	0.0270587	-0.0207151	-0.0118328	0.0489277	-0.00747169	-0.0265393	0.0340456	-0.0192327	0.0309659	0.0101962	-0.0199859	-0.0380639	0.0102614	-0.0128649	0.0280241	-0.0415133	-0.0102264	0.0108077	0.0158702	0.0128934	-0.018173	-0.0161089	0.0119571	-0.0185912	0.013205
0	0	0	0	0.406109	0.948445	-0.0227141	-0.0115355	-0.0207151	-0.0039357	-0.0104614	-0.00747169	-0.0184766	-0.0170282	-0.00444309	-0.000337025	-0.00970643	-0.00978779	-0.00344886	-0.00140294	0.000291118	0.00275285	0.0094536	-0.0232276	-0.0114581	-0.0107401	-0.0113283	-0.00447783	0.00543687	-0.0130217	-0.000165184	7.60639e-05
0	0	0	0	0.406109	0.948445	-0.0227141	-0.00648152	-0.0207151	-0.00307281	-6.53222e-05	-0.00747169	-0.0239941	-0.00882746	-0.00770789	0.00313169	-0.00636954	-0.00905019	-0.00876914	-0.000299259	-0.00130611	0.00588309	0.00734183	-0.0225563	-0.0114581	-0.0100829	-0.0105897	-0.0048529	0.00480253	-0.0122149	-0.000647093	0.00040469
0	0	0	0	0.406109	0.948445	-0.0227141	0.0168334	-0.0207151	-0.0118328	0.0483821	-0.00747169	-0.0265393	0.0257075	-0.0183126	0.0280763	0.0105288	-0.0194565	-0.035044	0.00964558	-0.0111673	0.0274223	-0.0275611	-0.0175032	-0.00473149	0.00299111	0.000894719	-0.0129221	-0.00623091	-0.000384857	-0.0112154	0.0060274
0	0	0	0	0.406109	0.948445	-0.0227141	0.0129285	-0.0207151	-0.0102293	0.0523355	-0.00747169	-0.0265393	0.0258934	-0.020356	0.0249128	0.00916999	-0.0173502	-0.0350991	0.00822391	-0.0104705	0.0269616	-0.0061785	-0.0211691	-0.0114581	-0.00432378	-0.00606654	-0.00740271	0.000689585	-0.00765357	-0.00465362	0.00304873
0	0	0	0	0.406109	0.948445	-0.0227141	0.0137619	-0.0207151	-0.0078105	0.0444596	-0.00747169	-0.0265393	0.0223139	-0.0182651	0.0207453	0.00581847	-0.0141075	-0.0315154	0.00633381	-0.00881007	0.0208993	-0.0113549	-0.0199262	-0.0106763	-0.00217234	-0.00398899	-0.00852467	-0.00102033	-0.00547174	-0.00572339	0.00436784
0	1	1	1	0.406109	0.948445	0.0149076	-0.019981	-0.000472625	0.00577078	-0.0207441	-0.00478888	0.0207732	-0.017536	0.0115976	-0.0222631	0.000593298	0.0233041	0.0209931	-0.00252583	0.00122101	-0.0117919	0.0248366	0.00612722	-0.0114581	-0.0162634	-0.0131448	0.0192249	0.0165852	-0.0124488	-0.0142649	-0.0242899
0	0	0	0	0.406109	0.948445	-0.0227141	0.0135284	-0.0207151	-0.0106861	0.0537223	-0.00747169	-0.0265393	0.0265933	-0.0203586	0.0260806	0.00976139	-0.0184198	-0.0359866	0.00833952	-0.0106843	0.0270308	-0.0104113	-0.0207194	-0.0111892	-0.00283747	-0.0048758	-0.00842986	-0.000627284	-0.00637292	-0.00623474	0.0035367
0	0	0	0	0.406109	0.948445	-0.0227141	0.0318695	-0.0207151	-0.0118328	-0.00582241	-0.00747169	-0.0265393	0.00103948	0.000915488	0.020473	0.0181302	-0.00397986	-0.0184823	0.0136015	-0.0114313	0.0147818	-0.0415133	0.0156002	0.0218116	0.0281978	0.032059	-0.0235557	-0.0302411	0.0322461	-0.0419438	0.00954377
0	0	0	0	0.406109	0.948445	-0.0227141	0.0132771	-0.0207151	-0.0106148	0.0522291	-0.00747169	-0.0265393	0.0259874	-0.0202878	0.0254817	0.0097724	-0.0177435	-0.0353523	0.00842861	-0.0107163	0.0275081	-0.00783488	-0.0211867	-0.0114581	-0.00362291	-0.00571346	-0.00764251	0.000259175	-0.00721018	-0.00543821	0.00316845
0	0	0	0	0.406109	0.948445	-0.0227141	-0.00149559	-0.0207151	-0.0022607	0.00946115	-0.00747169	-0.0265393	-0.00332155	-0.00967543	0.00628324	-0.00338965	-0.0083731	-0.0134828	0.000670413	-0.00286726	0.00761668	0.00547412	-0.0221922	-0.0114581	-0.0093422	-0.00990925	-0.00530063	0.00417414	-0.0114929	-0.00123626	0.000741576
0	0	0	0	0.406109	0.948445	-0.0227141	0.0187458	-0.0207151	-0.0118328	0.0454229	-0.00747169	-0.0265393	0.0250647	-0.0176959	0.02889	0.0110876	-0.0205321	-0.0347486	0.00977101	-0.0116295	0.0275873	-0.0415133	-0.0128687	0.00395383	0.00959622	0.00706357	-0.0134139	-0.0105504	0.00602882	-0.0157195	0.00913935
0	0	0	0	0.406109	0.948445	-0.0227141	0.0267001	-0.0207151	-0.0118328	0.0500275	-0.00747169	-0.0265393	0.0343195	-0.0189441	0.0348322	0.0128453	-0.024353	-0.0392307	0.0115461	-0.0135573	0.0307578	-0.0415133	-0.00809492	0.0180417	0.0208567	0.0167421	-0.018788	-0.0192189	0.0161926	-0.0234087	0.0146701
0	0	0	0	0.406109	0.948445	-0.0227141	0.0175136	-0.0207151	-0.0118328	0.0490438	-0.00747169	-0.0265393	0.0245551	-0.0176411	0.0279814	0.0114978	-0.0182287	-0.0355011	0.00917759	-0.0111146	0.0254875	-0.0293951	-0.0182977	-0.000309587	0.00563812	0.00221719	-0.0126334	-0.00687238	0.000801294	-0.0120654	0.00760223
0	1	0	1	0.406109	0.948445	-0.0227141	-0.0143454	-0.0207151	-0.00329619	-0.0171602	-0.00747169	-0.012966	-0.017536	-0.00097815	-0.00215709	-0.0100869	-0.00882427	-9.53396e-05	-0.00196605	0.00147272	-0.000575796	0.0112714	-0.0233856	-0.0114581	-0.0112193	-0.0117191	-0.00386341	0.00597276	-0.0134128	-0.000227092	-0.000348874
0	0	0	0	0.406109	0.948445	-0.0227141	0.0108877	-0.0207151	-0.00918375	0.0491693	-0.00747169	-0.0265393	0.0232799	-0.0195808	0.0232618	0.00818787	-0.0163753	-0.0333209	0.00750714	-0.00974547	0.0256674	-0.00112638	-0.0222785	-0.0114581	-0.00627526	-0.00786335	-0.00672236	0.00213878	-0.00949118	-0.00349868	0.00203553
0	0	0	0	0.406109	0.948445	-0.0227141	0.0724799	-0.0207151	-0.0118328	0.0276844	-0.00747169	-0.0265393	0.0723321	-0.0138086	0.0585747	0.029073	-0.0293614	-0.0469897	0.0190758	-0.0157105	0.0343199	-0.0415133	0.0275255	0.0898989	0.083888	0.0801964	-0.0566176	-0.0749628	0.0804797	-0.0723865	0.044721
0	0	0	0	0.406109	0.948445	-0.0227141	0.0238301	-0.0207151	-0.0118328	0.0480298	-0.00747169	-0.0265393	0.0321719	-0.018312	0.033503	0.0126321	-0.0232527	-0.0376407	0.0112342	-0.0128351	0.02993	-0.0415133	-0.0115594	0.0101299	0.0150012	0.0115366	-0.0185926	-0.0158895	0.0107305	-0.0206309	0.0113372
0	0	0	0	0.406109	0.948445	-0.0227141	0.013272	-0.0207151	-0.0117535	0.0468422	-0.00747169	-0.0265393	0.021086	-0.0178296	0.0258775	0.00967565	-0.0192031	-0.0331381	0.00852929	-0.0103759	0.0261135	-0.0220889	-0.0164319	-0.00704851	0.000832682	-0.000697586	-0.00893375	-0.00368421	-0.00182348	-0.0100156	0.00472889
0	0	0	0	0.406109	0.948445	-0.0227141	0.000894861	-0.0207151	-0.00435287	0.0203013	-0.00747169	-0.0265393	0.00473563	-0.012771	0.0100963	-0.000819816	-0.0103231	-0.0186087	0.0023656	-0.00418624	0.0125576	0.00536614	-0.0225147	-0.0114581	-0.00901017	-0.00990857	-0.00497426	0.00427294	-0.0115356	-0.00128944	0.000923759
0	0	0	0	0.406109	0.948445	-0.0227141	0.00162457	-0.0207151	-0.00472438	0.0137787	-0.00747169	-0.0265393	0.00249938	-0.0113439	0.00900639	-0.00215191	-0.0101677	-0.0164869	0.00223617	-0.00423818	0.0112426	0.000914862	-0.022291	-0.0114581	-0.00801441	-0.00882031	-0.00752875	0.00250584	-0.0104378	-0.00211424	0.00151448
0	0	0	0	0.406109	0.948445	-0.0227141	0.0136864	-0.0207151	-0.0105425	0.0411791	-0.00747169	-0.0265393	0.0189754	-0.0166942	0.0228592	0.00675059	-0.0168495	-0.030524	0.00740582	-0.00931682	0.0230806	-0.0215571	-0.0160195	-0.00910271	-8.16491e-05	-0.000950128	-0.0094396	-0.00366972	-0.00207669	-0.0093678	0.00450511
0	0	0	0	0.406109	0.948445	-0.0227141	0.0163596	-0.0207151	-0.0118328	0.0421518	-0.00747169	-0.0265393	0.018217	-0.0154201	0.0261156	0.0100163	-0.0177494	-0.0320794	0.00858859	-0.0105698	0.0235303	-0.0338859	-0.0152299	-0.00190748	0.00541953	0.00336521	-0.0131468	-0.00800338	0.00232938	-0.0132406	0.0071457
0	0	1	1	0.406109	0.948445	-0.0227141	-0.00103705	-0.0207151	-0.00867642	-0.0177719	-0.00747169	-0.0171969	-0.017536	0.00423291	-0.000188785	0.0106209	0.00836691	-0.00433596	0.00662939	-0.00738526	0.0056266	-0.0415133	0.0343759	-0.0114581	-0.00775968	0.0119978	0.00844119	-0.00431395	0.0128575	-0.0347811	-0.018617
0	0	0	0	0.406109	0.948445	-0.0227141	0.0806241	-0.0207151	-0.0118328	-0.00136825	-0.00747169	-0.0265393	0.0604681	-0.000620907	0.0521141	0.0343554	-0.015916	-0.0347829	0.0217671	-0.0147989	0.0267099	-0.0415133	0.0473352	0.0775068	0.0814044	0.0883142	-0.0609461	-0.0819608	0.0898174	-0.0862136	0.0375685
0	0	0	0	0.406109	0.948445	-0.0227141	0.016002	-0.0207151	-0.0118328	0.0470508	-0.00747169	-0.0265393	0.0237791	-0.0178944	0.027004	0.0102249	-0.0184725	-0.0342342	0.00900604	-0.0110035	0.0265903	-0.0274435	-0.0167507	-0.00371582	0.00351849	0.00129906	-0.0112364	-0.00581362	5.68264e-05	-0.0114532	0.00625312
0	0	0	0	0.406109	0.948445	-0.0227141	0.0186111	-0.0207151	-0.0118328	0.0516046	-0.00747169	-0.0265393	0.0286103	-0.0190893	0.0296927	0.011239	-0.0207268	-0.0368501	0.0100063	-0.0116819	0.028515	-0.0369616	-0.0149458	0.00125297	0.00741162	0.00464046	-0.0128746	-0.00871989	0.00360643	-0.0140151	0.00819054
0	0	0	0	0.406109	0.948445	-0.0227141	0.0166867	-0.0207151	-0.0118328	0.0490451	-0.00747169	-0.0265393	0.0253289	-0.0183671	0.0278781	0.00958758	-0.0202589	-0.0349612	0.00925753	-0.0110334	0.0270865	-0.0286149	-0.0165646	-0.00418629	0.00337668	0.00130796	-0.012042	-0.0062109	0.000158714	-0.0112909	0.00624266
0	0	0	0	0.406109	0.948445	-0.0227141	0.061928	-0.0207151	-0.0118328	0.00688697	-0.00747169	-0.0265393	0.0434263	-0.00459937	0.0429674	0.0271558	-0.0165974	-0.0336381	0.0183656	-0.0140783	0.0249224	-0.0415133	0.0190032	0.0701303	0.0672639	0.0642571	-0.0493439	-0.061447	0.0642771	-0.0620915	0.0353331
0	0	0	0	0.406109	0.948445	-0.0227141	0.0106937	-0.0207151	-0.0111958	0.0366084	-0.00747169	-0.0265393	0.0139175	-0.0148711	0.0223778	0.00871976	-0.0159046	-0.0284941	0.00776296	-0.0090913	0.0229467	-0.0196843	-0.0163631	-0.0114581	-0.00187105	-0.00203599	-0.009722	-0.00307917	-0.003239	-0.00961639	0.00301946
0	0	0	0	0.406109	0.948445	-0.0227141	0.0130075	-0.0207151	-0.0114152	0.0485505	-0.00747169	-0.0265393	0.0228694	-0.0186479	0.0256086	0.00897647	-0.0188717	-0.0336618	0.0083452	-0.0102988	0.0262006	-0.0147002	-0.0193793	-0.0107341	-0.00202215	-0.00368018	-0.00940973	-0.00188188	-0.00505037	-0.00731462	0.00377991
0	0	0	0	0.406109	0.948445	-0.0227141	0.0117989	-0.0207151	-0.0114596	0.0373048	-0.00747169	-0.0265393	0.0124248	-0.0139257	0.0233757	0.00912752	-0.0171419	-0.0287955	0.00791565	-0.00906206	0.021577	-0.0260569	-0.0152308	-0.00693509	0.00156216	0.000639468	-0.0105994	-0.00520583	-0.000366466	-0.0117295	0.00465618
0	0	0	0	0.406109	0.948445	-0.0227141	-0.00664329	-0.0207151	-0.00375318	0.00246293	-0.00747169	-0.0253633	-0.0100679	-0.00723392	0.00458895	-0.00588405	-0.0108358	-0.009412	0.000201108	-0.00148436	0.0064417	0.00693714	-0.0220924	-0.0114581	-0.0103725	-0.0105664	-0.00478538	0.00477352	-0.0121489	-0.000979135	6.48454e-05
0	0	0	0	0.406109	0.948445	-0.0227141	0.00984586	-0.0207151	-0.00960034	0.0450206	-0.00747169	-0.0265393	0.0178211	-0.0174731	0.0232708	0.0082951	-0.0177246	-0.0311002	0.00756215	-0.00929236	0.0245242	-0.00838475	-0.0188993	-0.0114581	-0.00445751	-0.00535257	-0.00657	0.000430804	-0.00664895	-0.00611739	0.00228224
0	0	0	0	0.406109	0.948445	-0.0227141	0.0080934	-0.0207151	-0.00620949	0.0307552	-0.00747169	-0.0265393	0.014683	-0.0159154	0.0154859	0.00237714	-0.0120157	-0.0250865	0.0045334	-0.00688213	0.0175115	-0.00209051	-0.021752	-0.0114581	-0.00592471	-0.00724632	-0.0073581	0.00162367	-0.00886241	-0.00327299	0.00250535
0	0	0	0	0.406109	0.948445	-0.0227141	0.0129242	-0.0207151	-0.00921918	0.0432224	-0.00747169	-0.0265393	0.0188537	-0.0170087	0.0223625	0.00684485	-0.0156283	-0.0309121	0.00723988	-0.00921222	0.0228918	-0.0113948	-0.0189806	-0.0114581	-0.00330615	-0.00440672	-0.00864436	-0.000970277	-0.00564783	-0.0062881	0.00325169
0	1	1	1	0.406109	0.948445	-0.00498878	-0.0199273	-0.0207151	0.00417978	-0.0207441	-0.00747169	0.00664206	-0.017536	0.00807828	-0.0146568	0.000460216	0.0156959	0.0107551	-0.000824081	0.000888207	-0.00715012	0.00621336	0.0111979	-0.0114581	-0.0162634	-0.0095842	0.0146969	0.0123557	-0.0091313	-0.0147714	-0.0224818
0	0	0	0	0.406109	0.948445	-0.0227141	0.0202888	-0.0207151	-0.0118328	0.0547353	-0.00747169	-0.0265393	0.0325279	-0.0205	0.0316183	0.011946	-0.0222721	-0.0389348	0.0105244	-0.0125392	0.0301933	-0.0376382	-0.0165597	0.00197595	0.00766976	0.0042094	-0.0141903	-0.00904709	0.00301484	-0.0135829	0.00850266
0	0	0	0	0.406109	0.948445	-0.0227141	-0.00446646	-0.0207151	-0.00363356	0.00299305	-0.00747169	-0.026175	-0.00757062	-0.00796304	0.0042783	-0.00493434	-0.00855258	-0.0103798	0.000434233	-0.00214859	0.00702115	0.0067113	-0.0226269	-0.0114581	-0.00979123	-0.0103391	-0.00520026	0.00453009	-0.0119946	-0.000901216	0.000495054
0	0	0	0	0.406109	0.948445	-0.0227141	0.00997167	-0.0207151	-0.00869389	0.0293966	-0.00747169	-0.0265393	0.00299799	-0.0105224	0.0189325	0.00811375	-0.0111402	-0.0242402	0.00682764	-0.00802357	0.0176793	-0.0160815	-0.0155061	-0.0114581	-0.00292137	-0.00260389	-0.00695699	-0.00142468	-0.00390933	-0.00972483	0.00175748
0	0	0	0	0.406109	0.948445	-0.0227141	0.0177909	-0.0207151	-0.0118328	0.020778	-0.00747169	-0.0265393	0.00370768	-0.00839801	0.019557	0.00875883	-0.00960996	-0.0232433	0.0081106	-0.00946083	0.017174	-0.0415133	-0.00992399	0.00109036	0.00856683	0.00752274	-0.0145478	-0.0110886	0.0065924	-0.0156314	0.00800114
0	0	0	0	0.406109	0.948445	-0.0227141	0.0412095	-0.0207151	-0.0118328	0.0457832	-0.00747169	-0.0265393	0.0499646	-0.018861	0.0442225	0.0173718	-0.0282489	-0.043525	0.0143285	-0.0153743	0.0341124	-0.0415133	0.00505351	0.0412079	0.0420481	0.0387855	-0.0334068	-0.0394976	0.0385364	-0.0410774	0.0244441
0	0	0	0	0.406109	0.948445	-0.0227141	0.0047964	-0.0207151	-0.00548747	0.0236561	-0.00747169	-0.0265393	0.0083056	-0.0135629	0.0124829	0.000497477	-0.010974	-0.0211	0.00350656	-0.00563892	0.014505	0.00122984	-0.0226389	-0.0114581	-0.00752165	-0.00876997	-0.00700263	0.0026865	-0.0103834	-0.00225231	0.0016991
0	0	0	0	0.406109	0.948445	-0.0227141	-0.00191882	-0.0207151	-0.00325185	0.00926096	-0.00747169	-0.0265393	-0.00174034	-0.010159	0.00659702	-0.00366948	-0.00925722	-0.0136668	0.00100119	-0.00286642	0.00904422	0.00562818	-0.0227209	-0.0114581	-0.00923398	-0.0100197	-0.00562928	0.0041116	-0.0116485	-0.00124232	0.000821691
0	0	0	0	0.406109	0.948445	-0.0227141	0.112136	-0.0207151	-0.0118328	-0.0166998	-0.00747169	-0.0265393	0.110874	0.00365002	0.07115	0.0640037	-0.0074632	-0.0413276	0.0289123	-0.00466062	0.02745	-0.0415133	0.0489376	0.0999683	0.102624	0.106955	-0.0868812	-0.103919	0.108536	-0.103061	0.0470094
0	1	0	1	0.406109	0.948445	-0.0227141	-0.0146324	-0.0207151	-0.00373392	-0.0194255	-0.00747169	-0.0137724	-0.017536	-0.00164143	-0.00278043	-0.0107463	-0.00862401	0.000522608	-0.00208736	0.0014546	0.000533311	0.0109334	-0.023398	-0.0114581	-0.01114	-0.011654	-0.0039314	0.00590964	-0.013405	-7.30525e-05	-0.000221055
0	0	0	0	0.406109	0.948445	-0.0227141	0.0440083	-0.0207151	-0.0118328	0.0447214	-0.00747169	-0.0265393	0.0486611	-0.0178984	0.0446695	0.0174431	-0.0286856	-0.0435798	0.014323	-0.0154706	0.0325611	-0.0415133	0.00612097	0.0482826	0.0471031	0.0429404	-0.0345496	-0.0423236	0.0425095	-0.0428678	0.0276517
0	1	0	1	0.406109	0.948445	-0.0227141	-0.0145531	-0.0207151	-0.00380406	-0.0205454	-0.00747169	-0.0145646	-0.017536	-0.00078009	-0.00138652	-0.0102396	-0.0100356	0.00103894	-0.00160445	0.00142571	0.00128738	0.0090235	-0.0216963	-0.0114581	-0.0117797	-0.0112518	-0.00387166	0.00564065	-0.0129098	-0.000813181	-0.00093829
0	0	0	0	0.406109	0.948445	-0.0227141	0.00279493	-0.0207151	-0.00434671	0.0142333	-0.00747169	-0.0265393	-0.00144247	-0.00973847	0.0104475	0.00032544	-0.00896281	-0.0163246	0.00299833	-0.00442164	0.0116786	-0.00188537	-0.0198586	-0.0114581	-0.00768589	-0.00752781	-0.00664567	0.00208899	-0.0090147	-0.00353835	0.0011249
0	0	0	0	0.406109	0.948445	-0.0227141	0.0106434	-0.0207151	-0.00937355	0.0473281	-0.00747169	-0.0265393	0.0215916	-0.0187683	0.0229435	0.00781997	-0.0164594	-0.0323872	0.00751408	-0.00961981	0.0251008	-0.000974974	-0.0225267	-0.0114581	-0.00645126	-0.00808713	-0.00696815	0.00216641	-0.00968322	-0.00345018	0.00188865
0	0	0	0	0.406109	0.948445	-0.0227141	0.0150394	-0.0207151	-0.0107683	0.05172	-0.00747169	-0.0265393	0.025193	-0.0194654	0.0260417	0.00907128	-0.0183799	-0.0353157	0.00831786	-0.0107975	0.0264055	-0.016504	-0.0183319	-0.00774057	-8.33513e-05	-0.00206016	-0.00823191	-0.00228117	-0.00343569	-0.00786501	0.00494034
0	0	0	0	0.406109	0.948445	-0.0227141	0.00795803	-0.0207151	-0.00955691	0.00231753	-0.00747169	-0.0265393	-0.0174685	-0.0018612	0.011298	0.0122694	-0.000351963	-0.0145273	0.00708021	-0.00767775	0.0108083	-0.0373927	-0.00351812	-0.00691349	0.00209389	0.00439757	-0.00606891	-0.00597043	0.00421996	-0.0201659	-0.000880044
0	0	0	0	0.406109	0.948445	-0.0227141	0.0108394	-0.0207151	-0.0104882	0.0465899	-0.00747169	-0.0265393	0.0226151	-0.0188767	0.0231523	0.00854066	-0.0161676	-0.0326551	0.00780662	-0.00968411	0.0254272	-0.00116257	-0.0235436	-0.0114581	-0.00590278	-0.00804256	-0.00791356	0.00174643	-0.00968628	-0.00403534	0.00204425
0	0	0	0	0.406109	0.948445	-0.0227141	0.0163873	-0.0207151	-0.0118328	0.0223176	-0.00747169	-0.0265393	0.00620786	-0.0102152	0.0210863	0.0133432	-0.0106964	-0.025488	0.00877266	-0.0101164	0.019322	-0.0415133	-0.0100259	0.00736241	0.0118869	0.0095118	-0.0132332	-0.0118481	0.00851349	-0.0178044	0.00939628
0	0	0	0	0.406109	0.948445	-0.0227141	0.0151022	-0.0207151	-0.0118328	0.0561327	-0.00747169	-0.0265393	0.0303582	-0.021283	0.0276054	0.0101815	-0.0191874	-0.0374825	0.00931904	-0.0111728	0.0289453	-0.0115989	-0.0214097	-0.0109019	-0.00243794	-0.00469096	-0.0100977	-0.00137718	-0.00619949	-0.00619469	0.00392439
0	0	0	0	0.406109	0.948445	-0.0227141	-0.00807157	-0.0207151	-0.00387144	-0.00280832	-0.00747169	-0.0227647	-0.0112443	-0.00666905	0.00230824	-0.00745733	-0.00978716	-0.00738028	-0.000474432	-0.000941872	0.00519579	0.00792967	-0.0229141	-0.0114581	-0.0102789	-0.0108574	-0.00487625	0.00496395	-0.0125303	-0.000422067	0.000340448
0	0	0	0	0.406109	0.948445	-0.0227141	-0.0040047	-0.0207151	-0.00428171	0.00638436	-0.00747169	-0.0265393	-0.00460022	-0.00918379	0.00564654	-0.00463748	-0.0101239	-0.0120047	0.00083674	-0.0024698	0.00851544	0.00638414	-0.0227982	-0.0114581	-0.0095796	-0.0103051	-0.00528458	0.00443556	-0.0119729	-0.000957547	0.000638592
0	0	0	0	0.406109	0.948445	-0.0227141	0.0190784	-0.0207151	-0.0118328	0.0509268	-0.00747169	-0.0265393	0.0276743	-0.0190197	0.0277708	0.00913324	-0.0188129	-0.0360045	0.00927611	-0.0113813	0.0269205	-0.0248611	-0.0183711	-0.00511499	0.00252959	4.2031e-05	-0.012305	-0.00540148	-0.00126206	-0.00980175	0.00623475
0	0	0	0	0.406109	0.948445	-0.0227141	0.0164632	-0.0207151	-0.0118328	0.0450746	-0.00747169	-0.0265393	0.022481	-0.0172487	0.0278325	0.0101596	-0.0206851	-0.0336045	0.00925054	-0.0109362	0.0266435	-0.0401219	-0.0118928	-0.000520746	0.00660517	0.00529762	-0.0117746	-0.00890516	0.00445613	-0.0152798	0.00705464
0	0	0	1	0.406109	0.948445	-0.0227141	0.000585682	-0.0207151	-0.00339101	0.00612984	-0.00747169	-0.0265393	-0.0165558	-0.00425275	0.00768816	0.00421961	-0.00252677	-0.0120502	0.00351365	-0.00375439	0.00806951	-0.00301386	-0.0142789	-0.0114581	-0.00987943	-0.00759107	-0.00318042	0.00331213	-0.00854607	-0.00652507	-0.00284767
0	0	0	0	0.406109	0.948445	-0.0227141	0.0616644	-0.0207151	-0.0118328	0.0110052	-0.00747169	-0.0265393	0.0417374	-0.0065581	0.0441198	0.0248118	-0.0211052	-0.0356367	0.0175484	-0.0153678	0.0261785	-0.0415133	0.0336039	0.0764142	0.0734267	0.0742605	-0.0455402	-0.0665627	0.0751069	-0.069914	0.0364571
0	0	0	0	0.406109	0.948445	-0.0227141	0.0046017	-0.0207151	-0.00334149	0.00427073	-0.00747169	-0.0265393	-0.0148702	-0.00398759	0.00832312	0.00281912	-0.0030521	-0.0122357	0.00344753	-0.00465394	0.00774196	-0.0150937	-0.0122026	-0.0114581	-0.00551086	-0.00344736	-0.00580643	-0.000438462	-0.00438044	-0.00911956	-0.000260003
0	0	0	0	0.406109	0.948445	-0.0227141	0.0271075	-0.0207151	-0.0118328	0.0541331	-0.00747169	-0.0265393	0.0395442	-0.0205245	0.0367111	0.0139474	-0.0251315	-0.0414283	0.0120598	-0.0138359	0.0324655	-0.0415133	-0.0107631	0.0165078	0.0195747	0.0150608	-0.0203794	-0.0188522	0.0141745	-0.0226881	0.0139927
0	0	0	0	0.406109	0.948445	-0.0227141	0.0293921	-0.0207151	-0.0118328	0.0496295	-0.00747169	-0.0265393	0.0368397	-0.019015	0.0337833	0.0114346	-0.021857	-0.039351	0.0112945	-0.0132966	0.0293642	-0.0415133	-0.00863455	0.0165324	0.0204233	0.0167903	-0.0203637	-0.0194627	0.01604	-0.022029	0.015138
0	0	1	0	0.406109	0.948445	-0.0227141	-0.00057417	-0.0207151	-0.00373999	0.00365856	-0.00747169	-0.0265393	-0.017536	-0.00438083	0.00736491	0.00800627	-0.000505538	-0.0122459	0.00392741	-0.00470822	0.00878477	0.00279606	-0.0174669	-0.0114581	-0.00855332	-0.00823846	-0.0025565	0.00426705	-0.00972149	-0.00424809	-0.00133464
0	0	0	0	0.406109	0.948445	-0.0227141	0.00591662	-0.0207151	-0.00431337	0.0287994	-0.00747169	-0.0265393	0.0102263	-0.0144801	0.013606	0.00155106	-0.0109192	-0.0230111	0.00342662	-0.00568664	0.0144811	-0.0010378	-0.0211458	-0.0114581	-0.00685862	-0.0077732	-0.00637762	0.00228237	-0.00931402	-0.00287912	0.00201525
0	0	0	0	0.406109	0.948445	-0.0227141	0.000894861	-0.0207151	-0.00435287	0.0203013	-0.00747169	-0.0265393	0.00473563	-0.012771	0.0100963	-0.000819816	-0.0103231	-0.0186087	0.0023656	-0.00418624	0.0125576	0.00536614	-0.0225147	-0.0114581	-0.00901017	-0.00990857	-0.00497426	0.00427294	-0.0115356	-0.00128944	0.000923759
0	0	0	0	0.406109	0.948445	-0.0227141	0.00923372	-0.0207151	-0.0082782	0.0461455	-0.00747169	-0.0265393	0.0198885	-0.018546	0.02177	0.00725853	-0.0159709	-0.0314299	0.00694914	-0.00916371	0.0242103	0.00107933	-0.0219527	-0.0114581	-0.00737694	-0.00855054	-0.00585788	0.00295781	-0.0101228	-0.00278481	0.00148195
0	0	0	0	0.406109	0.948445	-0.0227141	-0.000501937	-0.0207151	-0.00416576	0.0149578	-0.00747169	-0.0265393	-0.000606103	-0.0106688	0.00926474	-0.00211662	-0.0111112	-0.0159915	0.0019643	-0.00371112	0.0107484	0.00355138	-0.0215993	-0.0114581	-0.00903696	-0.00940132	-0.00553011	0.00370876	-0.0109741	-0.00181526	0.000749388
0	0	0	0	0.406109	0.948445	-0.0227141	0.0038026	-0.0207151	-0.00421533	0.00458785	-0.00747169	-0.0265393	-0.0117444	-0.00616453	0.00774127	0.00837898	0.000199966	-0.0143861	0.00399106	-0.00513408	0.00948368	-0.00478189	-0.0186303	-0.0114581	-0.00431443	-0.00526451	-0.00535261	0.00123089	-0.00695445	-0.00658101	0.00150556
0	0	0	0	0.406109	0.948445	-0.0227141	0.00732752	-0.0207151	-0.00618597	0.0355206	-0.00747169	-0.0265393	0.01487	-0.0162477	0.0163483	0.00320037	-0.012417	-0.0263057	0.00477335	-0.00686081	0.018433	0.00177273	-0.0224448	-0.0114581	-0.00730412	-0.00869443	-0.00583016	0.00310169	-0.0103307	-0.00245971	0.00170762
0	0	0	0	0.406109	0.948445	-0.0227141	-0.00374441	-0.0207151	-0.00394374	0.00491595	-0.00747169	-0.0265393	-0.005146	-0.00888517	0.00507189	-0.00492208	-0.0095001	-0.0114925	0.000608065	-0.00242732	0.00775439	0.00538038	-0.0225823	-0.0114581	-0.00931821	-0.0100053	-0.00563339	0.00409493	-0.0116507	-0.00107232	0.000833859
0	0	0	0	0.406109	0.948445	-0.0227141	0.0191032	-0.0207151	-0.0118328	0.035238	-0.00747169	-0.0265393	0.0149654	-0.0127979	0.0256864	0.0115016	-0.0150089	-0.0302943	0.00924634	-0.0110366	0.02221	-0.0415133	-0.0139144	0.00588902	0.0106789	0.00734914	-0.0148334	-0.0112767	0.00625489	-0.0168342	0.00914395
0	0	0	0	0.406109	0.948445	-0.0227141	0.0114741	-0.0207151	-0.00929935	0.0506898	-0.00747169	-0.0265393	0.0237067	-0.0198769	0.0240418	0.009192	-0.016879	-0.0340998	0.00783117	-0.0101438	0.0265237	-0.00379394	-0.0210419	-0.0114581	-0.00523958	-0.00683171	-0.00604092	0.00169057	-0.00835585	-0.00438414	0.00237348
0	0	0	0	0.406109	0.948445	-0.0227141	0.134499	-0.0207151	-0.0118328	-0.0041604	-0.00747169	-0.0265393	0.172362	-0.00855488	0.104632	0.0797182	-0.0206964	-0.062344	0.0291506	0.000127494	0.0403619	-0.0415133	0.0511821	0.161516	0.148441	0.142256	-0.11003	-0.135471	0.142034	-0.119015	0.0775211
0	0	0	0	0.406109	0.948445	-0.0227141	-0.00722184	-0.0207151	-0.00524635	0.000559121	-0.00747169	-0.025819	-0.00952936	-0.00703031	0.00442479	-0.00690389	-0.0118604	-0.00924131	0.000366385	-0.00154275	0.00727465	0.00790237	-0.0230157	-0.0114581	-0.0101981	-0.0108332	-0.00491203	0.00493026	-0.0125245	-0.000494351	0.000356935
0	0	0	0	0.406109	0.948445	-0.0227141	0.00900797	-0.0207151	-0.00893983	0.0438759	-0.00747169	-0.0265393	0.0162317	-0.0168622	0.0222916	0.00785009	-0.0166831	-0.0302527	0.00724082	-0.00897238	0.0235102	-0.00505328	-0.0199131	-0.0114581	-0.00583239	-0.00659792	-0.00651105	0.00132751	-0.00800223	-0.00495258	0.0017696
0	0	0	0	0.406109	0.948445	-0.0227141	0.0129364	-0.0207151	-0.00945938	0.0449135	-0.00747169	-0.0265393	0.0208067	-0.0176912	0.0225042	0.00675	-0.0155839	-0.031626	0.00726456	-0.00939726	0.0232215	-0.00456775	-0.0223558	-0.0114581	-0.00502921	-0.00693311	-0.00845971	0.000789302	-0.00847969	-0.00457589	0.0025783
0	0	0	0	0.406109	0.948445	-0.0227141	0.00920148	-0.0207151	-0.00551812	0.0327615	-0.00747169	-0.0265393	0.0141272	-0.015678	0.0161355	0.00307062	-0.0115586	-0.0257357	0.0044755	-0.00707555	0.0172017	-0.00226274	-0.0216919	-0.0114581	-0.00575159	-0.00721071	-0.00689514	0.00171138	-0.00880746	-0.0037085	0.00243926
0	1	0	1	0.406109	0.948445	-0.0227141	-0.00493684	-0.0207151	-0.00185849	-0.00037894	-0.00747169	-0.0218478	-0.017536	-0.00385807	0.00382066	-0.00167578	-0.00462578	-0.0078149	0.000852479	-0.00134875	0.00396961	0.00633608	-0.0207241	-0.0114581	-0.0103562	-0.0102144	-0.00364254	0.00504704	-0.0117508	-0.00215973	-0.000767459
0	0	0	0	0.406109	0.948445	-0.0227141	0.0344749	-0.0207151	-0.0118328	0.0489796	-0.00747169	-0.0265393	0.0412721	-0.0191098	0.0370263	0.0124716	-0.0238552	-0.0407533	0.0122752	-0.0140897	0.0307856	-0.0415133	-0.00567656	0.0271032	0.0284631	0.023709	-0.0230318	-0.0251591	0.0228905	-0.0276124	0.0192692
0	0	0	0	0.406109	0.948445	-0.0227141	-0.00182	-0.0207151	-0.00373393	0.00984348	-0.00747169	-0.0265393	-0.00173177	-0.0102766	0.00705246	-0.00360127	-0.0098811	-0.0139388	0.00118468	-0.00317037	0.0095664	0.00488696	-0.0224037	-0.0114581	-0.00933992	-0.00996232	-0.00560847	0.00402873	-0.0116046	-0.00119884	0.000794238
0	0	0	0	0.406109	0.948445	-0.0227141	0.0399509	-0.0207151	-0.0118328	0.0480648	-0.00747169	-0.0265393	0.0425143	-0.0181355	0.0387699	0.0132628	-0.0247694	-0.0419067	0.0125227	-0.0145214	0.0294987	-0.0415133	0.00257697	0.0383844	0.038582	0.0347161	-0.0272238	-0.0337113	0.0343934	-0.0351582	0.0242466
0	0	0	0	0.406109	0.948445	-0.0227141	0.0284174	-0.0207151	-0.0118328	0.00717495	-0.00747169	-0.0265393	0.00525521	-0.00301873	0.0241711	0.0130394	-0.00952535	-0.0214326	0.0112684	-0.0123909	0.0186169	-0.0415133	0.000329286	0.0196034	0.0245516	0.0237095	-0.0236123	-0.0255134	0.0231653	-0.0336487	0.0125681
0	0	0	0	0.406109	0.948445	-0.0227141	0.01512	-0.0207151	-0.0118328	0.0374578	-0.00747169	-0.0265393	0.0179328	-0.0149431	0.0255436	0.0107886	-0.017258	-0.0305743	0.00914043	-0.0103541	0.0247529	-0.0371642	-0.0134648	-0.00362914	0.0047278	0.00390307	-0.0136946	-0.00864155	0.00287654	-0.0144704	0.00608793
0	0	0	0	0.406109	0.948445	-0.0227141	0.0121398	-0.0207151	-0.00843786	0.040589	-0.00747169	-0.0265393	0.0182063	-0.0169412	0.0211546	0.00600848	-0.0151584	-0.0298109	0.00657399	-0.00876896	0.0219628	-0.0110478	-0.0188675	-0.0114581	-0.00316265	-0.00429137	-0.00806256	-0.000777152	-0.00559038	-0.00629791	0.00337276
0	1	0	0	0.406109	0.948445	-0.0227141	-0.0129944	-0.0207151	-0.0043927	-0.0134428	-0.00747169	-0.0171424	-0.017536	-0.00337346	-0.00070499	-0.0109356	-0.0109135	-0.00219202	-0.00164202	0.000762938	0.00238205	0.0103731	-0.0236021	-0.0114581	-0.0108778	-0.0116143	-0.00421549	0.00572485	-0.0133434	-1.27129e-05	9.00768e-06
0	0	0	0	0.406109	0.948445	-0.0227141	0.00821718	-0.0207151	-0.00863829	0.0323126	-0.00747169	-0.0265393	0.00629469	-0.0126206	0.0190119	0.00830996	-0.0124458	-0.0254423	0.00668746	-0.00806106	0.0190263	-0.00925014	-0.0188983	-0.0114581	-0.00510699	-0.00536269	-0.00811118	-7.77824e-05	-0.0067909	-0.0065178	0.00172624
0	0	0	0	0.406109	0.948445	-0.0227141	-0.00975824	-0.0207151	-0.00431158	-0.00591511	-0.00747169	-0.0219262	-0.0147421	-0.00541103	0.00152747	-0.00745657	-0.00968536	-0.00570302	-0.000465456	-0.000502997	0.00470426	0.00852808	-0.0228388	-0.0114581	-0.0106269	-0.0110433	-0.00477674	0.00511923	-0.0126916	-0.00051583	3.67343e-05
0	0	0	0	0.406109	0.948445	-0.0227141	0.019841	-0.0207151	-0.0118328	0.0471381	-0.00747169	-0.0265393	0.0274785	-0.0182707	0.0301818	0.0111428	-0.0218305	-0.0357943	0.0100412	-0.0119573	0.0283707	-0.0415133	-0.0111394	0.00430293	0.0104829	0.00849773	-0.0145869	-0.0121165	0.00760203	-0.0174446	0.00918889
0	0	0	0	0.406109	0.948445	-0.0227141	0.0123586	-0.0207151	-0.0106468	0.0484608	-0.00747169	-0.0265393	0.0217255	-0.018362	0.0249542	0.00866454	-0.0183265	-0.0332395	0.0081066	-0.0101591	0.0255802	-0.0103595	-0.020087	-0.0114581	-0.00320324	-0.00479208	-0.0083314	-0.000595782	-0.00625714	-0.00616619	0.00326348
0	0	0	0	0.406109	0.948445	-0.0227141	0.0123586	-0.0207151	-0.0106468	0.0484608	-0.00747169	-0.0265393	0.0217255	-0.018362	0.0249542	0.00866454	-0.0183265	-0.0332395	0.0081066	-0.0101591	0.0255802	-0.0103595	-0.020087	-0.0114581	-0.00320324	-0.00479208	-0.0083314	-0.000595782	-0.00625714	-0.00616619	0.00326348
0	0	0	0	0.406109	0.948445	-0.0227141	0.102566	-0.0207151	-0.0118328	-0.0171698	-0.00747169	-0.0265393	0.0799527	0.00304402	0.0608115	0.0486691	-0.0140159	-0.0352529	0.0268353	-0.0126219	0.0273062	-0.0415133	0.0557104	0.112526	0.107984	0.111224	-0.0759899	-0.102214	0.112085	-0.102564	0.0498244
0	0	0	0	0.406109	0.948445	-0.0227141	-0.00843971	-0.0207151	-0.00412263	-0.00309979	-0.00747169	-0.0217032	-0.015624	-0.00466722	0.00297952	-0.00609092	-0.00980385	-0.00722442	6.48634e-05	-0.000846102	0.00439742	0.00935923	-0.0233342	-0.0114581	-0.0105049	-0.0111265	-0.00462802	0.00527171	-0.0128331	-0.000721443	8.06128e-06
0	0	0	0	0.406109	0.948445	-0.0227141	0.0644979	-0.0207151	-0.0118328	0.035354	-0.00747169	-0.0265393	0.0670507	-0.015752	0.0555158	0.0254781	-0.0294461	-0.0472316	0.0178158	-0.0160942	0.0345117	-0.0415133	0.0189936	0.0761201	0.0718781	0.0676205	-0.0512578	-0.0646215	0.0677525	-0.0622212	0.0392844
0	0	0	0	0.406109	0.948445	-0.0227141	0.00385728	-0.0207151	-0.00866996	0.00202309	-0.00747169	-0.0265393	-0.017536	-0.00195334	0.0099612	0.00758635	-0.00199449	-0.011898	0.00556712	-0.00739708	0.0112512	-0.0256973	-0.00418196	-0.0114581	-0.00511193	0.000328542	-0.00409863	-0.00213605	-0.000555207	-0.0155161	-0.00331979
0	0	0	0	0.406109	0.948445	-0.0227141	0.0305148	-0.0207151	-0.0118328	0.048438	-0.00747169	-0.0265393	0.0402538	-0.0190067	0.0375698	0.014822	-0.0241032	-0.0405134	0.0126638	-0.0142268	0.0319687	-0.0415133	-0.00899895	0.021593	0.0243491	0.0198167	-0.0246309	-0.0232584	0.0189401	-0.0255576	0.0167147
0	0	0	0	0.406109	0.948445	-0.0227141	-0.012357	-0.0207151	-0.00450079	-0.0122993	-0.00747169	-0.0178649	-0.017536	-0.00368496	-0.000253426	-0.010584	-0.0109599	-0.00281029	-0.00142605	0.000532805	0.00280048	0.0101583	-0.0235464	-0.0114581	-0.0108274	-0.0115573	-0.00429569	0.00565143	-0.0132704	-5.0624e-05	3.76707e-05
0	0	0	0	0.406109	0.948445	-0.0227141	0.0225252	-0.0207151	-0.0118328	0.0209118	-0.00747169	-0.0265393	0.00912651	-0.00865892	0.0219259	0.0103442	-0.0106619	-0.0250489	0.00929028	-0.0101263	0.0180533	-0.0415133	-0.0102371	0.00701745	0.013654	0.0115015	-0.0195749	-0.0157159	0.0107179	-0.0192536	0.01086
0	0	0	0	0.406109	0.948445	-0.0227141	0.0573032	-0.0207151	-0.0118328	-0.00786739	-0.00747169	-0.0265393	0.0203662	0.00103765	0.0336042	0.022084	-0.0127084	-0.0243359	0.0173308	-0.015857	0.0204253	-0.0415133	0.0463772	0.0590321	0.0629396	0.0718096	-0.0382798	-0.0619118	0.0730333	-0.0717324	0.0267703
0	0	0	0	0.406109	0.948445	-0.0227141	0.0357483	-0.0207151	-0.0118328	0.0203563	-0.00747169	-0.0265393	0.0220046	-0.00882704	0.032226	0.0162036	-0.0156224	-0.0299696	0.0135728	-0.0141649	0.0250504	-0.0415133	0.00359839	0.0279941	0.0319651	0.0306253	-0.0288055	-0.0321289	0.0302221	-0.0348903	0.0186218
0	0	0	0	0.406109	0.948445	-0.0227141	-0.0117018	-0.0207151	-0.00400323	-0.010902	-0.00747169	-0.0182456	-0.0173282	-0.00431847	-0.000453104	-0.00992275	-0.00989551	-0.00322546	-0.00144437	0.000322118	0.00265502	0.00964746	-0.0233701	-0.0114581	-0.0107586	-0.0114227	-0.0044291	0.00550609	-0.0131211	-0.000126982	7.01595e-05
0	0	0	0	0.406109	0.948445	-0.0227141	0.0419873	-0.0207151	-0.0118328	0.0110692	-0.00747169	-0.0265393	0.0219927	-0.00555689	0.0325944	0.0192641	-0.0141287	-0.0286244	0.0145314	-0.0135528	0.0219871	-0.0415133	0.00723955	0.0450409	0.0447072	0.0414132	-0.0342264	-0.0407337	0.0410441	-0.0431541	0.0244555
0	0	0	0	0.406109	0.948445	-0.0227141	-0.0129485	-0.0207151	-0.00433842	-0.0135731	-0.00747169	-0.0170432	-0.017536	-0.00332858	-0.000753194	-0.0109185	-0.0108088	-0.00214639	-0.00165692	0.000754146	0.00231568	0.0103199	-0.0235711	-0.0114581	-0.0108761	-0.0115977	-0.00422288	0.00571167	-0.0133246	-1.32889e-05	1.2404e-05
0	0	0	0	0.406109	0.948445	-0.0227141	-0.00839919	-0.0207151	-0.0017767	-0.0111595	-0.00747169	-0.0154239	-0.017536	-0.00181446	0.000278286	-0.00695307	-0.00680171	-0.0027481	-0.000939381	-5.11501e-05	0.000434837	0.00415332	-0.0206671	-0.0114581	-0.0099302	-0.00975905	-0.0052554	0.0040968	-0.0112922	-0.00181853	-0.000224856
0	0	0	0	0.406109	0.948445	-0.0227141	0.0345757	-0.0207151	-0.0118328	0.0229961	-0.00747169	-0.0265393	0.0222536	-0.00902528	0.0323497	0.0158909	-0.0168528	-0.0309049	0.0125823	-0.0130964	0.023577	-0.0415133	0.00226031	0.0306126	0.0329009	0.030249	-0.0269077	-0.0311469	0.0300191	-0.0362786	0.0181678
0	0	0	0	0.406109	0.948445	-0.0227141	-0.00264937	-0.0207151	-0.00338028	0.0084453	-0.00747169	-0.0265393	-0.00443642	-0.00922958	0.00744439	-0.00401379	-0.0109322	-0.0130976	0.000981082	-0.00275148	0.0092155	0.005317	-0.0216593	-0.0114581	-0.00984952	-0.010084	-0.00479562	0.00440831	-0.0116487	-0.00131144	0.000343667
0	0	0	0	0.406109	0.948445	-0.0227141	-0.0033449	-0.0207151	-0.00535674	0.00847825	-0.00747169	-0.0265393	-0.00400587	-0.00915811	0.00656075	-0.0043562	-0.0110384	-0.0128921	0.00138938	-0.00292788	0.00925627	0.00577018	-0.0232126	-0.0114581	-0.00929562	-0.0103093	-0.0057491	0.00420012	-0.011958	-0.00105407	0.000794979
0	0	0	0	0.406109	0.948445	-0.0227141	0.0781488	-0.0207151	-0.0118328	0.000289266	-0.00747169	-0.0265393	0.0505573	-0.00158564	0.0493342	0.0289634	-0.0191846	-0.0340561	0.0209401	-0.0169574	0.0267797	-0.0415133	0.0455456	0.0899663	0.0872061	0.0899851	-0.0567436	-0.0809199	0.0913231	-0.0824937	0.0421727
0	1	1	1	0.406109	0.948445	-0.0173616	-0.0110655	-0.0207151	-0.00142999	-0.0207441	-0.00747169	-0.00580512	-0.017536	0.00570755	-0.0070812	0.0028777	0.010751	0.00411876	0.00172917	-0.00238442	-0.000757603	-0.00736604	0.0114475	-0.0114581	-0.0162634	-0.00483592	0.00944369	0.00717264	-0.00501101	-0.0147607	-0.0170645
0	0	0	0	0.406109	0.948445	-0.0227141	-0.0125394	-0.0207151	-0.00476007	-0.0115369	-0.00747169	-0.0185103	-0.017536	-0.00385754	4.28948e-05	-0.0104014	-0.011381	-0.00313103	-0.00126473	0.00053442	0.00309987	0.0103126	-0.0236734	-0.0114581	-0.0108133	-0.0116103	-0.0042874	0.00568693	-0.0133261	-5.6842e-05	3.09726e-05
0	0	0	0	0.406109	0.948445	-0.0227141	-0.0125394	-0.0207151	-0.00476007	-0.0115369	-0.00747169	-0.0185103	-0.017536	-0.00385754	4.28948e-05	-0.0104014	-0.011381	-0.00313103	-0.00126473	0.00053442	0.00309987	0.0103126	-0.0236734	-0.0114581	-0.0108133	-0.0116103	-0.0042874	0.00568693	-0.0133261	-5.6842e-05	3.09726e-05
0	0	0	0	0.406109	0.948445	-0.0227141	0.0203906	-0.0207151	-0.0118328	0.0478283	-0.00747169	-0.0265393	0.028501	-0.0182635	0.0304966	0.0118041	-0.020952	-0.0362961	0.0103559	-0.0121626	0.0284998	-0.0415133	-0.0149133	0.00312312	0.00925077	0.00624224	-0.0161625	-0.0111977	0.00515444	-0.0153091	0.00911015
0	0	0	0	0.406109	0.948445	-0.0227141	0.0361323	-0.0207151	-0.0118328	0.0396621	-0.00747169	-0.0265393	0.0394072	-0.0161089	0.0389735	0.0156991	-0.0239117	-0.0387975	0.013315	-0.014538	0.0308945	-0.0415133	0.000666603	0.030959	0.0336752	0.0309963	-0.028885	-0.0322276	0.0305664	-0.0348369	0.0203355
0	0	0	0	0.406109	0.948445	-0.0227141	-0.00474145	-0.0207151	-0.0025054	0.0045645	-0.00747169	-0.0249498	-0.00681678	-0.00849771	0.00427939	-0.00539938	-0.00898074	-0.0107989	-0.000127143	-0.00186581	0.00602226	0.00689775	-0.022471	-0.0114581	-0.00986363	-0.0104236	-0.00486089	0.00468318	-0.0120364	-0.000781237	0.000514454
0	1	0	0	0.406109	0.948445	-0.0153623	-0.0132749	-0.0207151	-0.000215899	-0.0207441	-0.00747169	-0.00572651	-0.017536	0.00297441	-0.00584383	-0.00696696	-0.000156132	0.00491945	-0.00234509	0.00182818	-0.00479331	0.00835607	-0.0201223	-0.0114581	-0.0114059	-0.0106783	-0.00335729	0.00554442	-0.0122057	-0.00140853	-0.00137141
0	0	0	0	0.406109	0.948445	-0.0227141	0.0045461	-0.0207151	-0.00645941	0.0172401	-0.00747169	-0.0265393	-0.00461773	-0.00911736	0.0126689	0.00941129	-0.00506381	-0.0194466	0.00542502	-0.0066826	0.014006	-0.00278772	-0.0191101	-0.0114581	-0.00573225	-0.00638081	-0.00568745	0.00181602	-0.00802863	-0.00512299	0.00108222
0	0	0	0	0.406109	0.948445	-0.0227141	0.0151421	-0.0207151	-0.0118263	0.0501018	-0.00747169	-0.0265393	0.0248948	-0.019006	0.026109	0.00967337	-0.0181021	-0.0349387	0.00866576	-0.0107755	0.0263929	-0.0189622	-0.0184014	-0.00801947	0.000131621	-0.00166698	-0.0101916	-0.003361	-0.00305583	-0.00830981	0.00501123
0	0	0	0	0.406109	0.948445	-0.0227141	0.0900463	-0.0207151	-0.0118328	0.0154292	-0.00747169	-0.0265393	0.0822591	-0.00961823	0.0647489	0.0361826	-0.0280066	-0.0470654	0.0219596	-0.0154364	0.0337144	-0.0415133	0.0476995	0.114917	0.106683	0.105602	-0.0675365	-0.0954862	0.106525	-0.0909563	0.0548128
0	0	0	0	0.406109	0.948445	-0.0227141	0.0160674	-0.0207151	-0.0118328	0.0260593	-0.00747169	-0.0265393	0.0112132	-0.0106557	0.0238606	0.0111232	-0.01376	-0.0264451	0.00886926	-0.00999348	0.0218431	-0.0415133	-0.00459732	-0.00548413	0.00571514	0.00867925	-0.0140754	-0.0122554	0.00809684	-0.0220744	0.00395878
0	0	0	0	0.406109	0.948445	-0.0227141	0.000842284	-0.0207151	-0.00429834	0.0148486	-0.00747169	-0.0265393	-0.00344056	-0.00928082	0.0104789	-0.000465206	-0.0100794	-0.0157909	0.00278579	-0.00408169	0.0115456	0.00231444	-0.0203962	-0.0114581	-0.00952697	-0.00918029	-0.00523459	0.00364222	-0.0106407	-0.00273419	-5.66616e-06
0	0	0	0	0.406109	0.948445	-0.0227141	0.00965001	-0.0207151	-0.00874009	0.0489891	-0.00747169	-0.0265393	0.0214037	-0.0187961	0.0229255	0.00751054	-0.0169034	-0.0326587	0.00717981	-0.00923578	0.0242001	0.00199332	-0.0231505	-0.0114581	-0.00733094	-0.00893614	-0.00656035	0.00292576	-0.0105626	-0.00295503	0.00143629
0	0	0	0	0.406109	0.948445	-0.0227141	0.0116192	-0.0207151	-0.00976036	0.0468424	-0.00747169	-0.0265393	0.020578	-0.0181708	0.0234219	0.00850715	-0.0166595	-0.0324749	0.00764241	-0.00970917	0.0245533	-0.00920795	-0.0198296	-0.0114581	-0.00378646	-0.00502293	-0.0079776	-0.000248657	-0.00650595	-0.00579343	0.0030357
0	0	0	0	0.406109	0.948445	-0.0227141	0.00920542	-0.0207151	-0.00877277	0.0197963	-0.00747169	-0.0265393	-0.00405276	-0.00758972	0.0161314	0.00820663	-0.0077765	-0.0202627	0.00666354	-0.00784802	0.0150564	-0.0157235	-0.0162836	-0.0114581	-0.00282254	-0.00314717	-0.00935414	-0.00201279	-0.00442692	-0.00792231	0.00214823
0	0	0	0	0.406109	0.948445	-0.0227141	-0.0104532	-0.0207151	-0.00418089	-0.00769291	-0.00747169	-0.0201982	-0.0149664	-0.00515544	0.000629636	-0.00906291	-0.0101202	-0.00484179	-0.000982297	-0.000149826	0.00379464	0.00974366	-0.0237614	-0.0114581	-0.0105995	-0.0114501	-0.00467459	0.00542963	-0.0131776	-0.000238388	0.000133939
0	0	0	0	0.406109	0.948445	-0.0227141	-0.00943762	-0.0207151	-0.00362131	-0.00416155	-0.00747169	-0.0204931	-0.0141198	-0.00541714	0.00166742	-0.00848167	-0.0104929	-0.00614614	-0.000836835	-0.000336176	0.0035677	0.00899027	-0.0234007	-0.0114581	-0.0105336	-0.0112452	-0.0048692	0.00520835	-0.0129103	-0.00041204	0.000137291
0	0	0	0	0.406109	0.948445	-0.0227141	0.0133798	-0.0207151	-0.0116722	0.0474729	-0.00747169	-0.0265393	0.0242776	-0.0187567	0.0251092	0.00886916	-0.0168619	-0.0335814	0.00835227	-0.0104093	0.0263937	-0.00678046	-0.0227786	-0.0114581	-0.00349495	-0.0058625	-0.00913459	-0.00010508	-0.00761977	-0.00573182	0.00320959
0	0	0	0	0.406109	0.948445	-0.0227141	0.0113044	-0.0207151	-0.0102955	0.0462787	-0.00747169	-0.0265393	0.0196404	-0.0176168	0.0238096	0.00997947	-0.0161657	-0.0324767	0.00794592	-0.00959187	0.0241591	-0.0101125	-0.0209392	-0.0111292	-0.00285699	-0.00481916	-0.008713	-0.000721755	-0.00637933	-0.00650937	0.00341181
0	0	0	0	0.406109	0.948445	-0.0227141	0.00643161	-0.0207151	-0.00645614	0.0324593	-0.00747169	-0.0265393	0.0134292	-0.0155925	0.0152453	0.00244223	-0.0123332	-0.0249205	0.00455901	-0.00646517	0.0173296	0.0013252	-0.0226595	-0.0114581	-0.0073935	-0.00879032	-0.00657584	0.00284154	-0.0103899	-0.00234351	0.00171874
0	0	0	0	0.406109	0.948445	-0.0227141	0.0610966	-0.0207151	-0.0118328	0.00678019	-0.00747169	-0.0265393	0.0425507	-0.00393111	0.0437852	0.0234123	-0.0175628	-0.0318844	0.0182832	-0.0165605	0.0275095	-0.0415133	0.0244632	0.0571847	0.0600559	0.0618497	-0.0477843	-0.0596723	0.0623455	-0.0626165	0.0298319
0	0	0	0	0.406109	0.948445	-0.0227141	0.0301703	-0.0207151	-0.0118328	0.0372038	-0.00747169	-0.0265393	0.0286766	-0.0141371	0.0337129	0.0150115	-0.0203302	-0.0353975	0.0121463	-0.0130635	0.0265966	-0.0415133	-0.00609794	0.024986	0.0269796	0.02265	-0.0248312	-0.0251497	0.0220032	-0.0283614	0.0172657
0	0	0	0	0.406109	0.948445	-0.0227141	0.0986794	-0.0207151	-0.0118328	-0.00323575	-0.00747169	-0.0265393	0.0926288	-0.00132526	0.0654699	0.0496023	-0.0146643	-0.0416911	0.0259628	-0.0102177	0.0293362	-0.0415133	0.032909	0.0969645	0.0943919	0.0924772	-0.0757919	-0.0899128	0.0927839	-0.0863378	0.0466832
0	0	0	0	0.406109	0.948445	-0.0227141	0.0298413	-0.0207151	-0.0118328	0.0502353	-0.00747169	-0.0265393	0.0355124	-0.0182577	0.0355521	0.0122209	-0.0245969	-0.0397255	0.0116106	-0.0133015	0.0291266	-0.0415133	-0.00468312	0.0197829	0.0235671	0.0206529	-0.0217758	-0.0229338	0.0201184	-0.0263266	0.0158703
0	0	0	0	0.406109	0.948445	-0.0227141	-0.00664329	-0.0207151	-0.00375318	0.00246293	-0.00747169	-0.0253633	-0.0100679	-0.00723392	0.00458895	-0.00588405	-0.0108358	-0.009412	0.000201108	-0.00148436	0.0064417	0.00693714	-0.0220924	-0.0114581	-0.0103725	-0.0105664	-0.00478538	0.00477352	-0.0121489	-0.000979135	6.48454e-05
0	0	0	1	0.406109	0.948445	-0.0227141	-0.000745258	-0.0207151	-0.0063227	-0.00718805	-0.00747169	-0.0234739	-0.017536	0.000763999	0.00453618	0.00606434	0.00208878	-0.00693698	0.00459789	-0.00581359	0.00740794	-0.0138226	-0.00306546	-0.0114581	-0.0105578	-0.0037349	-0.000455453	0.00204187	-0.00420717	-0.0131304	-0.00759584
0	0	0	0	0.406109	0.948445	-0.0227141	0.00445426	-0.0207151	-0.00495047	0.0266874	-0.00747169	-0.0265393	0.00971944	-0.0142323	0.0129545	0.000968981	-0.0108952	-0.0221022	0.00347283	-0.00538796	0.0149282	0.00338131	-0.0229477	-0.0114581	-0.00800218	-0.00931966	-0.00608071	0.00341468	-0.0109553	-0.00205574	0.00140744
0	0	0	0	0.406109	0.948445	-0.0227141	0.00694944	-0.0207151	-0.00759025	0.0323773	-0.00747169	-0.0265393	0.00667403	-0.0131504	0.0181332	0.00912427	-0.0105687	-0.0256365	0.00642509	-0.00794835	0.0192237	-0.00382354	-0.020495	-0.0114581	-0.0052022	-0.00652296	-0.00575624	0.0016752	-0.00808647	-0.00567593	0.0016609
0	0	0	0	0.406109	0.948445	-0.0227141	0.0693322	-0.0207151	-0.0118328	0.0355001	-0.00747169	-0.0265393	0.0709902	-0.0160156	0.0583176	0.0268944	-0.0312821	-0.0489092	0.0184151	-0.0167058	0.0356024	-0.0415133	0.0286079	0.0891894	0.0824956	0.0789924	-0.0514045	-0.071925	0.0795055	-0.0707433	0.044159
0	1	1	1	0.406109	0.948445	0.00630083	-0.0199725	-0.00430579	0.00312673	-0.0207441	-0.00747169	0.00988608	-0.017536	0.0106195	-0.0150303	-0.00609686	0.0108245	0.0169474	-0.00336312	0.00321803	-0.0110242	0.00653028	-0.00581423	-0.0114581	-0.0162634	-0.010805	0.0040697	0.0085846	-0.0114141	-0.00757336	-0.0115784
0	0	0	0	0.406109	0.948445	-0.0227141	0.0215777	-0.0207151	-0.0118328	0.0541959	-0.00747169	-0.0265393	0.0338237	-0.0205559	0.0313506	0.0112702	-0.0212153	-0.0389318	0.0106138	-0.0127106	0.0304148	-0.040123	-0.0152449	0.00152478	0.0080941	0.00527337	-0.0152119	-0.01001	0.004165	-0.013666	0.0090524
0	0	0	0	0.406109	0.948445	-0.0227141	0.0233165	-0.0207151	-0.0118328	0.0484478	-0.00747169	-0.0265393	0.0313648	-0.0186309	0.032864	0.0124301	-0.0236952	-0.0376905	0.0110098	-0.012633	0.0297417	-0.0415133	-0.00713221	0.0137158	0.0179153	0.0151522	-0.016995	-0.0174945	0.0146068	-0.0225911	0.012853
0	0	0	0	0.406109	0.948445	-0.0227141	0.00116463	-0.0207151	-0.00315573	0.018154	-0.00747169	-0.0265393	0.00208128	-0.0118818	0.00969425	-0.00119423	-0.00985104	-0.017641	0.00183468	-0.00418633	0.0112961	0.0048782	-0.0218066	-0.0114581	-0.009131	-0.00967399	-0.00486913	0.00416557	-0.0112496	-0.00144999	0.000769875
0	0	0	0	0.406109	0.948445	-0.0227141	0.0388893	-0.0207151	-0.0118328	0.052329	-0.00747169	-0.0265393	0.0460585	-0.0195241	0.0403076	0.0139343	-0.0256815	-0.0436171	0.0130304	-0.0147298	0.0312356	-0.0415133	-0.00211308	0.0312916	0.0333871	0.0293755	-0.0289901	-0.031063	0.0288808	-0.0314522	0.0217646
0	0	0	0	0.406109	0.948445	-0.0227141	0.0101761	-0.0207151	-0.00948426	0.0438882	-0.00747169	-0.0265393	0.0177588	-0.0170455	0.0222558	0.00775324	-0.0159894	-0.0307694	0.00722329	-0.00918927	0.0234001	-0.00512032	-0.0212873	-0.0114581	-0.004876	-0.00643994	-0.00744046	0.000886493	-0.00798035	-0.00510434	0.00241815
0	0	0	0	0.406109	0.948445	-0.0227141	0.0323039	-0.0207151	-0.0118328	0.0332014	-0.00747169	-0.0265393	0.027271	-0.0123707	0.0333206	0.0131145	-0.0198241	-0.0337411	0.0119858	-0.0126645	0.0254215	-0.0415133	-0.00288398	0.022219	0.0266241	0.0243686	-0.026432	-0.0270892	0.0238998	-0.0309342	0.0163728
0	0	0	0	0.406109	0.948445	-0.0227141	-0.00679324	-0.0207151	-0.00383731	-4.18471e-05	-0.00747169	-0.0241808	-0.00960288	-0.00731615	0.00304537	-0.00648365	-0.00935179	-0.00866332	-0.000154924	-0.00138983	0.00589211	0.00767424	-0.0228505	-0.0114581	-0.0101225	-0.0107304	-0.00488002	0.00488482	-0.012396	-0.000505084	0.000418212
0	0	0	0	0.406109	0.948445	-0.0227141	0.0188689	-0.0207151	-0.0118328	0.0466189	-0.00747169	-0.0265393	0.0258682	-0.0181101	0.0286301	0.0101523	-0.0205935	-0.0350063	0.00949003	-0.0116741	0.0274728	-0.0415133	-0.0114345	0.0019873	0.00871988	0.00717353	-0.0130774	-0.0104209	0.0062121	-0.0154316	0.00870211
0	0	0	0	0.406109	0.948445	-0.0227141	0.00814412	-0.0207151	-0.00856833	0.0224155	-0.00747169	-0.0265393	0.000129752	-0.0101819	0.0160212	0.0113454	-0.00700696	-0.0226622	0.00670514	-0.00795904	0.0164619	-0.0113101	-0.0184835	-0.00974817	-0.00219607	-0.00381034	-0.00747647	-0.000754335	-0.0053008	-0.00781865	0.00257604
0	0	0	0	0.406109	0.948445	-0.0227141	0.024161	-0.0207151	-0.0118328	0.0320497	-0.00747169	-0.0265393	0.0196746	-0.0121769	0.0287446	0.0133702	-0.0163601	-0.031181	0.0108993	-0.0119559	0.0237995	-0.0415133	-0.00810916	0.0057838	0.0135443	0.0124614	-0.0206257	-0.0172278	0.0118501	-0.0225046	0.00955449
0	0	0	0	0.406109	0.948445	-0.0227141	0.107676	-0.0207151	-0.0118328	-0.00478494	-0.00747169	-0.0265393	0.111862	-0.00278542	0.0738511	0.0570765	-0.0145404	-0.0452684	0.0257262	-0.00649985	0.0311156	-0.0415133	0.0361819	0.115957	0.109153	0.105176	-0.0824941	-0.100972	0.104799	-0.0955246	0.0553709
0	0	0	0	0.406109	0.948445	-0.0227141	0.0808027	-0.0207151	-0.0118328	0.00969026	-0.00747169	-0.0265393	0.0600754	-0.0060825	0.0555831	0.0281698	-0.026402	-0.0395129	0.020636	-0.0181816	0.0309036	-0.0415133	0.0447566	0.103926	0.0964938	0.0962888	-0.0576723	-0.0854264	0.0971542	-0.0849083	0.0487507
0	0	0	0	0.406109	0.948445	-0.0227141	0.0457197	-0.0207151	-0.0118328	0.0337604	-0.00747169	-0.0265393	0.0416355	-0.013517	0.0424709	0.0188185	-0.0244854	-0.0394518	0.0146791	-0.0150561	0.0293787	-0.0415133	0.0158948	0.0518101	0.0514719	0.0501936	-0.0337135	-0.0463465	0.0502649	-0.0499456	0.0278978
0	0	0	0	0.406109	0.948445	-0.0227141	-0.0060197	-0.0207151	-0.00430772	0.00297019	-0.00747169	-0.0262844	-0.00786702	-0.00796996	0.00421252	-0.0058435	-0.0100922	-0.0100496	0.000301259	-0.00184295	0.00704963	0.00746617	-0.0229325	-0.0114581	-0.0100208	-0.010716	-0.00491897	0.00483641	-0.0123781	-0.000586842	0.000444078
0	0	0	0	0.406109	0.948445	-0.0227141	0.0543448	-0.0207151	-0.0118328	0.0425628	-0.00747169	-0.0265393	0.0602629	-0.0187388	0.0509473	0.0207685	-0.0308639	-0.0466075	0.0165332	-0.0173643	0.0364793	-0.0415133	0.0126762	0.0664704	0.0615809	0.0565474	-0.0408083	-0.0532271	0.056172	-0.0522997	0.0348772
0	0	0	0	0.406109	0.948445	-0.0227141	0.0109302	-0.0207151	-0.00672432	0.0387499	-0.00747169	-0.0265393	0.0183859	-0.0171889	0.01852	0.0043446	-0.0134675	-0.0286497	0.00536501	-0.00776136	0.0193174	-0.00928047	-0.019517	-0.0114581	-0.00373065	-0.00486418	-0.00786277	-0.000241385	-0.00634935	-0.00514143	0.00350672
0	0	0	0	0.406109	0.948445	-0.0227141	0.0712136	-0.0207151	-0.0118328	-0.0158039	-0.00747169	-0.0265393	0.0264607	0.00267863	0.0380783	0.0250747	-0.0131223	-0.0241364	0.019851	-0.0192727	0.0230981	-0.0415133	0.0356891	0.0914272	0.0832829	0.0813018	-0.0483839	-0.0721469	0.0816479	-0.0734858	0.0415301
0	0	0	0	0.406109	0.948445	-0.0227141	0.0724403	-0.0207151	-0.0118328	0.00484503	-0.00747169	-0.0265393	0.051227	-0.00441568	0.0486495	0.0291029	-0.0200478	-0.0359854	0.0195006	-0.0151248	0.0265797	-0.0415133	0.0403611	0.0844682	0.0823386	0.0841958	-0.0547249	-0.0768171	0.0851382	-0.0778294	0.0404119
0	0	0	0	0.406109	0.948445	-0.0227141	0.0509606	-0.0207151	-0.0118328	0.00438007	-0.00747169	-0.0265393	0.0252832	-0.00352858	0.03501	0.0215569	-0.0151236	-0.0289592	0.0159405	-0.0141117	0.0216493	-0.0415133	0.0290361	0.054249	0.0559638	0.0583925	-0.0381614	-0.0540427	0.0592264	-0.0598328	0.0259901
0	0	0	0	0.406109	0.948445	-0.0227141	0.00795162	-0.0207151	-0.00721175	0.0353772	-0.00747169	-0.0265393	0.0120944	-0.0152657	0.01847	0.00463938	-0.0143335	-0.0262903	0.00565214	-0.00752787	0.019839	-0.00388049	-0.0194492	-0.0114581	-0.006624	-0.00696801	-0.00630032	0.00165807	-0.00828448	-0.00439931	0.00146253
0	0	0	0	0.406109	0.948445	-0.0227141	-0.0102596	-0.0207151	-0.00343763	-0.0077387	-0.00747169	-0.0186499	-0.0163164	-0.0045325	0.00052757	-0.00948043	-0.0103841	-0.00446216	-0.00118999	-1.68486e-05	0.00249486	0.00978563	-0.0238945	-0.0114581	-0.0106375	-0.0114952	-0.00478275	0.00541682	-0.0132231	-0.000396478	5.19207e-05
0	0	0	0	0.406109	0.948445	-0.0227141	0.0509083	-0.0207151	-0.0118328	0.012157	-0.00747169	-0.0265393	0.0274074	-0.00586605	0.0380546	0.0176269	-0.0199737	-0.0307016	0.015405	-0.0165034	0.0253898	-0.0415133	0.0245755	0.05645	0.0566347	0.0576188	-0.0366579	-0.0524956	0.057984	-0.0568031	0.0287921
0	1	0	1	0.406109	0.948445	-0.0227141	-0.0143454	-0.0207151	-0.00329619	-0.0171602	-0.00747169	-0.012966	-0.017536	-0.00097815	-0.00215709	-0.0100869	-0.00882427	-9.53396e-05	-0.00196605	0.00147272	-0.000575796	0.0112714	-0.0233856	-0.0114581	-0.0112193	-0.0117191	-0.00386341	0.00597276	-0.0134128	-0.000227092	-0.000348874
0	0	0	0	0.406109	0.948445	-0.0227141	0.0170946	-0.0207151	-0.0118328	0.0455057	-0.00747169	-0.0265393	0.0221475	-0.016496	0.0283381	0.0104122	-0.0201175	-0.0338465	0.00925118	-0.0109424	0.025165	-0.0363523	-0.0154026	-0.000228606	0.00636717	0.00372701	-0.0133221	-0.00843762	0.00268811	-0.0142367	0.00716255
0	0	0	0	0.406109	0.948445	-0.0227141	0.0222694	-0.0207151	-0.0118328	-0.00957412	-0.00747169	-0.0265393	-0.0133359	0.00228781	0.013783	0.0150281	-0.00024918	-0.0140877	0.0111627	-0.0117135	0.0127802	-0.0415133	0.0412472	-0.000447099	0.0161584	0.0338205	-0.0101649	-0.0266001	0.0352357	-0.0533621	-0.00510944
0	0	0	0	0.406109	0.948445	-0.0227141	0.0206305	-0.0207151	-0.0118328	-8.16796e-06	-0.00747169	-0.0265393	-0.00790812	-0.00139032	0.0175401	0.0117808	-0.00626498	-0.016812	0.00964301	-0.011086	0.0148954	-0.0415133	0.0152351	0.00447487	0.0156636	0.0233151	-0.0150071	-0.0217771	0.0235472	-0.0353923	0.00433923
0	0	0	0	0.406109	0.948445	-0.0227141	0.0480286	-0.0207151	-0.0118328	0.01523	-0.00747169	-0.0265393	0.0308723	-0.00706538	0.0377963	0.0207572	-0.018106	-0.0325729	0.0153756	-0.0143156	0.0244187	-0.0415133	0.0180334	0.0528071	0.0529339	0.052206	-0.0364424	-0.0488676	0.0526294	-0.0535743	0.0270791
0	0	0	0	0.406109	0.948445	-0.0227141	0.023015	-0.0207151	-0.0118328	0.0476236	-0.00747169	-0.0265393	0.0323712	-0.0186451	0.0324297	0.0118911	-0.0221822	-0.0373066	0.010763	-0.0125302	0.0295426	-0.0415133	-0.0114104	0.00688525	0.0130813	0.0105541	-0.0183304	-0.0149877	0.00962318	-0.0190907	0.0107444
0	0	0	0	0.406109	0.948445	-0.0227141	0.0780604	-0.0207151	-0.0118328	-0.0111043	-0.00747169	-0.0265393	0.0479748	0.00361055	0.0436559	0.0338728	-0.0100297	-0.0291388	0.0229477	-0.0139443	0.0229956	-0.0415133	0.0485985	0.0682508	0.0729103	0.0807896	-0.0512923	-0.0728916	0.0828518	-0.0849884	0.028408
0	0	0	0	0.406109	0.948445	-0.0227141	0.0309125	-0.0207151	-0.0118328	0.0298454	-0.00747169	-0.0265393	0.0257004	-0.0120814	0.0325178	0.0142387	-0.0192489	-0.0326701	0.0118136	-0.0126309	0.0250779	-0.0415133	-0.00246367	0.0257353	0.0288443	0.0262552	-0.0261931	-0.0279761	0.0255124	-0.0314479	0.017942
0	0	0	0	0.406109	0.948445	-0.0227141	-0.00203737	-0.0207151	-0.00312829	0.00985104	-0.00747169	-0.0265393	-0.00185396	-0.0103095	0.006472	-0.00343818	-0.00887286	-0.0138256	0.000891877	-0.00296302	0.00905999	0.00658789	-0.0229138	-0.0114581	-0.0094028	-0.0102826	-0.00493664	0.00456137	-0.0119801	-0.000984469	0.000743508
0	0	0	0	0.406109	0.948445	-0.0227141	0.00389335	-0.0207151	-0.00402417	0.0238937	-0.00747169	-0.0265393	0.00901787	-0.0142607	0.0118702	0.000387896	-0.0101524	-0.0210452	0.00288544	-0.00510138	0.0141547	0.00385926	-0.0227917	-0.0114581	-0.00827325	-0.00946012	-0.00577137	0.00364165	-0.0111044	-0.00180531	0.00130704
0	0	0	0	0.406109	0.948445	-0.0227141	0.069603	-0.0207151	-0.0118328	0.0400006	-0.00747169	-0.0265393	0.0773338	-0.0183634	0.0605563	0.0271989	-0.0327356	-0.051413	0.0183425	-0.016552	0.0373507	-0.0415133	0.0241735	0.0894797	0.0822561	0.077358	-0.0538013	-0.0715884	0.077377	-0.0678135	0.0451368
0	1	1	1	0.406109	0.948445	-0.0145253	-0.0195324	-0.0207151	-0.00159036	-0.0207441	-0.00747169	0.00588979	-0.017536	0.00952638	-0.0163556	0.00787891	0.0204079	0.00519856	0.00624488	-0.00633107	-0.000653616	-0.0359854	0.0680984	-0.0114581	-0.0162634	0.00255045	0.0315377	0.0110229	0.00660484	-0.0436804	-0.0509097
0	0	0	0	0.406109	0.948445	-0.0227141	0.00983101	-0.0207151	-0.00877695	0.0480415	-0.00747169	-0.0265393	0.0214168	-0.0190978	0.0224429	0.00780058	-0.0162888	-0.0323992	0.00729204	-0.00944509	0.0250145	0.00107852	-0.0222899	-0.0114581	-0.00721176	-0.00859565	-0.00593536	0.00294548	-0.0101893	-0.00281797	0.00155262
0	0	0	0	0.406109	0.948445	-0.0227141	0.0920579	-0.0207151	-0.0118328	0.0306987	-0.00747169	-0.0265393	0.109704	-0.0177445	0.0763438	0.0401489	-0.0328216	-0.0568151	0.0219426	-0.0150266	0.0418963	-0.0415133	0.0363609	0.118439	0.108016	0.103021	-0.0734226	-0.0959725	0.102933	-0.0877836	0.0576027
0	0	0	0	0.406109	0.948445	-0.0227141	0.113299	-0.0207151	-0.0118328	-0.0027474	-0.00747169	-0.0265393	0.116754	-0.00463092	0.0775019	0.0579154	-0.019582	-0.0489562	0.0264967	-0.00773319	0.032864	-0.0415133	0.0542487	0.124818	0.120956	0.122035	-0.0911284	-0.115731	0.12354	-0.108167	0.0609525
0	0	0	0	0.406109	0.948445	-0.0227141	0.0129211	-0.0207151	-0.00985591	0.0491683	-0.00747169	-0.0265393	0.0225354	-0.0187431	0.0240445	0.0080524	-0.0173591	-0.033353	0.00774428	-0.00957564	0.0248897	-0.0123357	-0.0184885	-0.0114581	-0.00289857	-0.00413026	-0.00734442	-0.000720156	-0.00542875	-0.00678338	0.00330525
0	0	0	0	0.406109	0.948445	-0.0227141	0.0669742	-0.0207151	-0.0118328	0.0339892	-0.00747169	-0.0265393	0.0750956	-0.0158412	0.0577942	0.0282285	-0.0265232	-0.0480394	0.0185636	-0.015778	0.0361719	-0.0415133	0.0160161	0.0790442	0.073941	0.0679336	-0.0544452	-0.0658189	0.0677989	-0.0619422	0.0410321
0	0	0	0	0.406109	0.948445	-0.0227141	0.000218568	-0.0207151	-0.0040561	0.0124394	-0.00747169	-0.0265393	0.000550037	-0.0109443	0.00798669	-0.00257648	-0.0095117	-0.0154573	0.001663	-0.00379098	0.0103308	0.00332385	-0.022321	-0.0114581	-0.00836405	-0.00924293	-0.00589382	0.0034931	-0.0109029	-0.00168657	0.00129655
0	0	0	0	0.406109	0.948445	-0.0227141	0.000894861	-0.0207151	-0.00435287	0.0203013	-0.00747169	-0.0265393	0.00473563	-0.012771	0.0100963	-0.000819816	-0.0103231	-0.0186087	0.0023656	-0.00418624	0.0125576	0.00536614	-0.0225147	-0.0114581	-0.00901017	-0.00990857	-0.00497426	0.00427294	-0.0115356	-0.00128944	0.000923759
0	0	0	0	0.406109	0.948445	-0.0227141	0.0154874	-0.0207151	-0.0118328	0.0201803	-0.00747169	-0.0265393	0.00440359	-0.00865116	0.0208455	0.01192	-0.00992969	-0.0236479	0.00926399	-0.0100207	0.0198316	-0.0415133	-0.0122079	0.000779817	0.00748227	0.00555839	-0.0141575	-0.00994303	0.00468472	-0.0160401	0.00673108
0	0	0	1	0.406109	0.948445	-0.0227141	0.000724063	-0.0207151	-0.00187819	-0.000161401	-0.00747169	-0.0239814	-0.017536	-0.00338357	0.00555493	0.00325903	-0.00083553	-0.00997748	0.00246673	-0.00341136	0.00563441	-0.00184119	-0.0171977	-0.0114581	-0.0080148	-0.00708556	-0.00392671	0.00292478	-0.00846552	-0.00538632	-0.000560849
0	1	1	1	0.406109	0.948445	0.0114454	-0.019981	0.00798377	0.00349836	-0.0207441	-0.00747169	0.0131009	-0.017536	0.0124773	-0.0166123	-0.00883462	0.00893332	0.0195083	-0.00466154	0.00573526	-0.0149737	0.0120489	-0.0123086	-0.0114581	-0.0162629	-0.0122293	0.00282974	0.00896727	-0.0130653	-0.00405971	-0.00831187
0	0	0	0	0.406109	0.948445	-0.0227141	0.0219278	-0.0207151	-0.0118328	0.00646253	-0.00747169	-0.0265393	-0.00196144	-0.0037072	0.0198575	0.0132003	-0.00756564	-0.0202314	0.00979198	-0.0104894	0.0156911	-0.0415133	0.000419328	0.0139566	0.0192744	0.0190145	-0.0177595	-0.0201998	0.0186046	-0.0278983	0.0104067
0	0	0	0	0.406109	0.948445	-0.0227141	-0.00588655	-0.0207151	-0.00278549	0.0021136	-0.00747169	-0.0235759	-0.00988588	-0.00708969	0.003941	-0.00631276	-0.00970549	-0.00939548	-0.000260735	-0.00145358	0.00526779	0.00715286	-0.0223745	-0.0114581	-0.0100953	-0.0105446	-0.00480637	0.00477067	-0.0121301	-0.000733886	0.000365803
0	0	0	0	0.406109	0.948445	-0.0227141	0.0199479	-0.0207151	-0.0118328	0.0481225	-0.00747169	-0.0265393	0.0292568	-0.0184972	0.0307953	0.0119925	-0.0212411	-0.0365209	0.0103569	-0.0119863	0.0288246	-0.0415133	-0.0160192	0.00429342	0.00964628	0.00592971	-0.0158116	-0.0108992	0.00477923	-0.0156694	0.00916534
0	0	0	0	0.406109	0.948445	-0.0227141	0.00513204	-0.0207151	-0.0063157	0.0169645	-0.00747169	-0.0265393	-0.00820322	-0.00714085	0.013493	0.00709888	-0.00653143	-0.0180112	0.00543892	-0.00661791	0.0132241	-0.00473351	-0.0178118	-0.0114581	-0.00610426	-0.00638763	-0.00535581	0.00179629	-0.0078219	-0.00526515	0.000528313
0	0	0	0	0.406109	0.948445	-0.0227141	0.00533292	-0.0207151	-0.00449701	0.0251296	-0.00747169	-0.0265393	0.00401754	-0.0121979	0.0130209	0.0041908	-0.00874837	-0.0216024	0.00392777	-0.00557882	0.01313	-0.000677546	-0.0212896	-0.0114581	-0.00683707	-0.00768438	-0.00664286	0.00216563	-0.00930253	-0.00351371	0.00164781
0	0	0	0	0.406109	0.948445	-0.0227141	0.0016366	-0.0207151	-0.00394145	0.0202162	-0.00747169	-0.0265393	0.00233171	-0.0120109	0.0113711	-3.7854e-05	-0.0109396	-0.0184774	0.00266215	-0.00458123	0.0130188	0.00419363	-0.0211176	-0.0114581	-0.00936311	-0.00954473	-0.00477983	0.00407185	-0.0110368	-0.00188513	0.000427399
0	0	0	1	0.406109	0.948445	-0.0227141	0.00385252	-0.0207151	-0.00529349	0.0268885	-0.00747169	-0.0265393	0.00463932	-0.012537	0.0145658	0.00233161	-0.0120241	-0.0215954	0.00416828	-0.00590009	0.01587	0.00368637	-0.0211399	-0.0114581	-0.00951913	-0.00959359	-0.00474949	0.00407685	-0.0110988	-0.00264234	-2.93335e-05
0	0	0	0	0.406109	0.948445	-0.0227141	0.0293849	-0.0207151	-0.0118328	0.0199273	-0.00747169	-0.0265393	0.0174471	-0.00776772	0.0264316	0.0130314	-0.0113847	-0.0271864	0.0111026	-0.0107472	0.0201672	-0.0415133	-0.0111133	0.0142885	0.0199801	0.0162009	-0.0266807	-0.0217606	0.0153909	-0.0252304	0.013428
0	1	0	1	0.406109	0.948445	-0.0227141	-0.0143454	-0.0207151	-0.00329619	-0.0171602	-0.00747169	-0.012966	-0.017536	-0.00097815	-0.00215709	-0.0100869	-0.00882427	-9.53396e-05	-0.00196605	0.00147272	-0.000575796	0.0112714	-0.0233856	-0.0114581	-0.0112193	-0.0117191	-0.00386341	0.00597276	-0.0134128	-0.000227092	-0.000348874
0	0	0	0	0.406109	0.948445	-0.0227141	0.00714742	-0.0207151	-0.00643213	0.0291566	-0.00747169	-0.0265393	0.0110418	-0.0142307	0.0153449	0.00279085	-0.0119525	-0.0239665	0.00459077	-0.00635738	0.0163834	-0.00258562	-0.0223457	-0.0114581	-0.0061243	-0.00748006	-0.0085695	0.0011884	-0.00909584	-0.00375033	0.00225801
0	0	0	0	0.406109	0.948445	-0.0227141	0.111267	-0.0207151	-0.0118328	-0.00353903	-0.00747169	-0.0265393	0.110221	-0.00462294	0.0752245	0.0544211	-0.0216315	-0.0476118	0.0259558	-0.00897017	0.0325511	-0.0415133	0.0484607	0.134867	0.124487	0.121263	-0.0862025	-0.112812	0.121599	-0.105592	0.0632861
0	0	0	0	0.406109	0.948445	-0.0227141	0.00850593	-0.0207151	-0.00518215	0.0342004	-0.00747169	-0.0265393	0.015082	-0.0164198	0.0156833	0.00345164	-0.0108694	-0.0261584	0.00443873	-0.00710956	0.017775	0.000322824	-0.0216075	-0.0114581	-0.00682888	-0.00802634	-0.00575716	0.00274391	-0.00962499	-0.00257753	0.00204487
0	0	0	0	0.406109	0.948445	-0.0227141	0.0594854	-0.0207151	-0.0118328	-0.00280542	-0.00747169	-0.0265393	0.033552	0.00116149	0.037164	0.0269048	-0.00871172	-0.0269671	0.0193187	-0.0142104	0.0220233	-0.0415133	0.0241545	0.0485113	0.0527385	0.0547161	-0.0444299	-0.0536351	0.0559266	-0.0624709	0.021215
0	0	1	1	0.406109	0.948445	-0.0196995	-0.000105971	-0.0207151	-0.00939327	-0.0207441	-0.00747169	-0.0111988	-0.017536	0.007273	-0.00278432	0.00827738	0.0113562	0.000643593	0.00578375	-0.00865615	0.00414494	-0.0406641	0.0222395	-0.0114581	-0.00646262	0.00682842	0.00698502	-0.00180324	0.00767251	-0.0282215	-0.0152587
0	0	0	0	0.406109	0.948445	-0.0227141	-0.0060197	-0.0207151	-0.00430772	0.00297019	-0.00747169	-0.0262844	-0.00786702	-0.00796996	0.00421252	-0.0058435	-0.0100922	-0.0100496	0.000301259	-0.00184295	0.00704963	0.00746617	-0.0229325	-0.0114581	-0.0100208	-0.010716	-0.00491897	0.00483641	-0.0123781	-0.000586842	0.000444078
0	0	0	0	0.406109	0.948445	-0.0227141	0.0243733	-0.0207151	-0.0118328	0.0520523	-0.00747169	-0.0265393	0.0335955	-0.0199912	0.0301677	0.00987341	-0.0200575	-0.0383208	0.0100818	-0.0123315	0.028112	-0.0415133	-0.0135976	0.0065674	0.0117446	0.00853086	-0.0155461	-0.0120803	0.00737756	-0.01543	0.01106
0	1	1	1	0.406109	0.948445	-0.0227141	-0.000568704	-0.0207151	-0.00261213	0.00859963	-0.00747169	-0.0265393	-0.0131539	-0.00627133	0.0078098	0.00335622	-0.00417644	-0.0133524	0.00268271	-0.00399494	0.00865778	0.0070241	-0.0206486	-0.0114581	-0.0101658	-0.0101011	-0.00312346	0.00517748	-0.0116579	-0.00273079	-0.00108341
0	0	0	0	0.406109	0.948445	-0.0227141	0.0209847	-0.0207151	-0.0118328	0.0103423	-0.00747169	-0.0265393	0.00028799	-0.0043994	0.019482	0.012456	-0.00665688	-0.0209862	0.00982997	-0.0101951	0.0159056	-0.0415133	-0.00219219	0.00562841	0.0136743	0.0141136	-0.0174524	-0.0167357	0.0141048	-0.025198	0.00715738
0	0	0	0	0.406109	0.948445	-0.0227141	0.0135644	-0.0207151	-0.0083532	0.0437792	-0.00747169	-0.0265393	0.0230341	-0.0186727	0.0206445	0.00602656	-0.0135483	-0.0315464	0.00661464	-0.00916888	0.022105	-0.00745754	-0.0212338	-0.0114581	-0.00409399	-0.0057128	-0.00875366	-1.35118e-05	-0.00733384	-0.00434375	0.00348046
0	1	0	1	0.406109	0.948445	-0.0227141	-0.0141408	-0.0207151	-0.00299861	-0.0159706	-0.00747169	-0.0125904	-0.017536	-0.00117233	-0.00185271	-0.0114467	-0.0101318	-0.000228628	-0.00227925	0.00134309	-0.000757961	0.0110177	-0.0234329	-0.0114581	-0.0111747	-0.0117437	-0.0039103	0.00594889	-0.0134263	-8.04259e-05	-0.000249918
0	0	0	0	0.406109	0.948445	-0.0227141	0.0875897	-0.0207151	-0.0118328	0.00201172	-0.00747169	-0.0265393	0.075628	-0.00441791	0.0593818	0.0400177	-0.0200539	-0.0409217	0.0228705	-0.0127747	0.029225	-0.0415133	0.0421379	0.0995858	0.0960613	0.0965201	-0.0691413	-0.090168	0.0974319	-0.0872878	0.0478172
0	0	0	0	0.406109	0.948445	-0.0227141	0.0137332	-0.0207151	-0.0110368	0.0494422	-0.00747169	-0.0265393	0.0233406	-0.0187437	0.0255594	0.0094181	-0.017974	-0.0341608	0.00829421	-0.0105344	0.0260986	-0.0145524	-0.019718	-0.0101119	-0.00172241	-0.00365078	-0.00938203	-0.00188333	-0.00504264	-0.00732377	0.0039647
0	0	0	0	0.406109	0.948445	-0.0227141	0.00711455	-0.0207151	-0.00817533	0.0336488	-0.00747169	-0.0265393	0.00891755	-0.0138041	0.0193695	0.00677743	-0.0140972	-0.0256861	0.00646387	-0.00785323	0.0205788	-0.00639342	-0.0185946	-0.0114581	-0.00652362	-0.00625701	-0.00688986	0.000985034	-0.00765288	-0.00549228	0.00121338
0	0	0	0	0.406109	0.948445	-0.0227141	0.00343266	-0.0207151	-0.00337203	0.0187443	-0.00747169	-0.0265393	0.0034186	-0.0117571	0.010579	-0.00049951	-0.00954454	-0.0185181	0.00235269	-0.00458354	0.0115397	0.000309556	-0.0213605	-0.0114581	-0.00707817	-0.00799205	-0.00632581	0.00249008	-0.00947165	-0.00298074	0.0017626
0	0	0	0	0.406109	0.948445	-0.0227141	0.0143514	-0.0207151	-0.0118328	0.0460071	-0.00747169	-0.0265393	0.0220462	-0.0174901	0.0259585	0.00984179	-0.0182632	-0.0332696	0.0087563	-0.0103857	0.0257989	-0.0247331	-0.0165874	-0.00711268	0.00140763	1.93124e-06	-0.0115007	-0.00510656	-0.00109217	-0.0104495	0.00521959
0	0	0	0	0.406109	0.948445	-0.0227141	-0.00384441	-0.0207151	-0.004208	0.00663359	-0.00747169	-0.0265393	-0.00502947	-0.00901408	0.00561168	-0.00462411	-0.00978791	-0.012037	0.000823006	-0.00261903	0.00843096	0.00731539	-0.0232262	-0.0114581	-0.00975817	-0.010659	-0.00499927	0.00475933	-0.0123577	-0.000785495	0.000547164
0	0	0	0	0.406109	0.948445	-0.0227141	0.0995192	-0.0207151	-0.0118328	-0.006607	-0.00747169	-0.0265393	0.0813814	0.00017192	0.0627571	0.043869	-0.0177714	-0.0389914	0.0250256	-0.0138282	0.0290149	-0.0415133	0.0618696	0.103854	0.103644	0.110253	-0.0714173	-0.100315	0.112472	-0.103683	0.0468344
0	0	0	0	0.406109	0.948445	-0.0227141	0.0413851	-0.0207151	-0.0118328	0.0461679	-0.00747169	-0.0265393	0.0478509	-0.0190155	0.0435573	0.0165751	-0.0285276	-0.0433733	0.0141597	-0.0159813	0.0341197	-0.0415133	0.00418712	0.0442788	0.0430698	0.0387835	-0.0303326	-0.0379664	0.03831	-0.0398969	0.0254149
0	0	0	0	0.406109	0.948445	-0.0227141	0.00956525	-0.0207151	-0.00882335	0.0471099	-0.00747169	-0.0265393	0.0188246	-0.0180758	0.0229633	0.00812242	-0.0172462	-0.0317379	0.00732792	-0.00931893	0.0244441	-0.00276727	-0.0208495	-0.0114581	-0.00600669	-0.00723539	-0.00593768	0.00199047	-0.00871574	-0.00423227	0.00185484
0	0	0	0	0.406109	0.948445	-0.0227141	0.0103902	-0.0207151	-0.00971734	0.036997	-0.00747169	-0.0265393	0.010848	-0.0141585	0.0215226	0.00993387	-0.014466	-0.0283526	0.00737903	-0.00891275	0.0208289	-0.017628	-0.0172592	-0.00888059	-0.000726624	-0.00200505	-0.00835659	-0.00248999	-0.00323774	-0.00929452	0.00377678
0	1	1	1	0.406109	0.948445	-0.0173419	-0.019981	-0.0207151	0.00121353	-0.0207441	-0.00747169	0.00933531	-0.017536	0.00843812	-0.016959	0.0113561	0.0233609	0.00385068	0.00607734	-0.00768392	-0.000270719	-0.0289276	0.0574041	-0.0114581	-0.0162634	0.00212454	0.0328597	0.0115312	0.00606056	-0.0435952	-0.0454974
0	0	0	0	0.406109	0.948445	-0.0227141	-0.00994776	-0.0207151	-0.00231864	-0.00655344	-0.00747169	-0.0167449	-0.017536	-0.00371527	0.00044711	-0.00907398	-0.00957008	-0.00438508	-0.00154366	0.000104923	0.000850778	0.00974416	-0.0236315	-0.0114581	-0.0108838	-0.0115425	-0.00461123	0.00550375	-0.0132558	-0.000494863	-0.000164195
0	0	0	0	0.406109	0.948445	-0.0227141	0.00584612	-0.0207151	-0.00570463	0.0253486	-0.00747169	-0.0265393	0.0101394	-0.0141587	0.0136022	0.00113458	-0.0113194	-0.0222786	0.00383104	-0.0058969	0.0156692	-0.00244373	-0.0213846	-0.0114581	-0.00665949	-0.00751997	-0.00767443	0.00158463	-0.00913142	-0.00310672	0.00214847
0	0	0	0	0.406109	0.948445	-0.0227141	-0.00567681	-0.0207151	-0.00421295	0.00183469	-0.00747169	-0.0260398	-0.00747501	-0.00782998	0.00482951	-0.00627644	-0.0108418	-0.0101908	0.000320748	-0.00179299	0.00754969	0.00718942	-0.0227097	-0.0114581	-0.00996902	-0.0105733	-0.00489376	0.00475699	-0.012231	-0.000680554	0.000484997
0	0	0	0	0.406109	0.948445	-0.0227141	-0.00807157	-0.0207151	-0.00387144	-0.00280832	-0.00747169	-0.0227647	-0.0112443	-0.00666905	0.00230824	-0.00745733	-0.00978716	-0.00738028	-0.000474432	-0.000941872	0.00519579	0.00792967	-0.0229141	-0.0114581	-0.0102789	-0.0108574	-0.00487625	0.00496395	-0.0125303	-0.000422067	0.000340448
0	0	0	0	0.406109	0.948445	-0.0227141	0.0182277	-0.0207151	-0.0118328	0.0227525	-0.00747169	-0.0265393	0.00895685	-0.00959265	0.0219584	0.0138743	-0.00946505	-0.0259693	0.00973116	-0.0102868	0.0196185	-0.0415133	-0.014916	0.0057679	0.0105504	0.00720142	-0.015963	-0.011275	0.00574078	-0.0169095	0.008888
0	0	0	0	0.406109	0.948445	-0.0227141	0.095077	-0.0207151	-0.0118328	-0.00567959	-0.00747169	-0.0265393	0.0740357	-0.00125413	0.0584912	0.0421425	-0.0179104	-0.0389495	0.024522	-0.0134162	0.0277471	-0.0415133	0.0486013	0.109957	0.104284	0.105307	-0.0697837	-0.09554	0.106164	-0.0933466	0.0514143
0	0	0	0	0.406109	0.948445	-0.0227141	0.00249572	-0.0207151	-0.0049377	0.0222228	-0.00747169	-0.0265393	0.0069985	-0.0131745	0.0112936	-0.000206666	-0.0107325	-0.0199557	0.00299585	-0.00467171	0.0135402	0.00611374	-0.0243425	-0.0114581	-0.0085011	-0.0101961	-0.0059279	0.0040771	-0.0119669	-0.00174066	0.00112133
0	0	0	0	0.406109	0.948445	-0.0227141	0.0148992	-0.0207151	-0.0096522	0.0473599	-0.00747169	-0.0265393	0.0235443	-0.0185437	0.0236423	0.00811116	-0.0150327	-0.0332601	0.00777352	-0.00999731	0.0246995	-0.00945633	-0.0211541	-0.011045	-0.0027769	-0.00498408	-0.00839598	-0.000441519	-0.00649912	-0.00587297	0.00371311
0	0	0	0	0.406109	0.948445	-0.0227141	0.016947	-0.0207151	-0.0100882	0.0425409	-0.00747169	-0.0265393	0.023166	-0.0176121	0.0225915	0.00653695	-0.0151624	-0.0318611	0.00724155	-0.00947554	0.0220127	-0.0259214	-0.0165885	-0.00466554	0.0031264	0.00113562	-0.0115875	-0.00566294	1.00692e-05	-0.00983696	0.00683804
0	0	0	0	0.406109	0.948445	-0.0227141	0.0145538	-0.0207151	-0.0108179	0.05261	-0.00747169	-0.0265393	0.0252805	-0.0195777	0.025897	0.00956257	-0.017818	-0.0354497	0.00851906	-0.0108197	0.0265475	-0.0120019	-0.0197728	-0.0103044	-0.00201882	-0.00386778	-0.00833775	-0.00109793	-0.00533218	-0.0064698	0.00408137
0	0	0	0	0.406109	0.948445	-0.0227141	0.0045935	-0.0207151	-0.00433555	0.0235546	-0.00747169	-0.0265393	0.00784842	-0.0135127	0.0119299	7.61478e-05	-0.0105716	-0.020936	0.0029239	-0.00532941	0.0131815	0.00114907	-0.0224366	-0.0114581	-0.00772217	-0.0087011	-0.00719506	0.00258798	-0.0103765	-0.00218446	0.00167042
0	0	0	0	0.406109	0.948445	-0.0227141	-0.00736885	-0.0207151	-0.00368305	-0.00304682	-0.00747169	-0.0225203	-0.01129	-0.00657993	0.00214063	-0.00715518	-0.009041	-0.00732984	-0.000390321	-0.0010889	0.00495045	0.00753235	-0.0229503	-0.0114581	-0.0101841	-0.0107334	-0.0053424	0.0047122	-0.0124045	-0.000533494	0.000385991
0	0	0	0	0.406109	0.948445	-0.0227141	0.000850334	-0.0207151	-0.00417001	0.0121197	-0.00747169	-0.0265393	-0.00181387	-0.0094749	0.00822653	-0.00224672	-0.00937158	-0.0150787	0.00201181	-0.00371821	0.00938218	0.000455372	-0.0216637	-0.0114581	-0.00807123	-0.00849287	-0.00781245	0.00225049	-0.0099987	-0.00257055	0.00125888
0	0	0	0	0.406109	0.948445	-0.0227141	0.0413715	-0.0207151	-0.0118328	0.0465186	-0.00747169	-0.0265393	0.046379	-0.0183765	0.0417825	0.015184	-0.026163	-0.0425524	0.0139371	-0.0154545	0.0328636	-0.0415133	0.00322685	0.0398812	0.0402579	0.0366638	-0.0302726	-0.0363499	0.0360687	-0.03715	0.0246692
0	0	0	0	0.406109	0.948445	-0.0227141	0.0364839	-0.0207151	-0.0118328	0.0205884	-0.00747169	-0.0265393	0.0248835	-0.00921447	0.0337383	0.0178266	-0.0178669	-0.0317629	0.0127681	-0.0127239	0.0237997	-0.0415133	0.0143297	0.0392782	0.0415549	0.041854	-0.0283993	-0.0394676	0.0420648	-0.0475459	0.0206329
0	0	0	0	0.406109	0.948445	-0.0227141	0.0335308	-0.0207151	-0.0118328	0.0166561	-0.00747169	-0.0265393	0.0187974	-0.00800245	0.0303176	0.0150238	-0.0158557	-0.0283541	0.0123682	-0.0130523	0.0233518	-0.0415133	0.00729355	0.031159	0.0343308	0.0331995	-0.027275	-0.0334658	0.0333986	-0.0385457	0.0185745
0	0	0	0	0.406109	0.948445	-0.0227141	0.0559048	-0.0207151	-0.0118328	0.00420415	-0.00747169	-0.0265393	0.030249	-0.00405365	0.0380509	0.0226785	-0.017147	-0.0304416	0.0169189	-0.0150908	0.0232506	-0.0415133	0.0264126	0.0635403	0.062682	0.0632337	-0.0424783	-0.0582931	0.0635737	-0.0611888	0.031543
0	0	0	0	0.406109	0.948445	-0.0227141	0.0129469	-0.0207151	-0.0113814	0.0281219	-0.00747169	-0.0265393	0.00733704	-0.0114399	0.0211992	0.0103392	-0.0132238	-0.0258997	0.00767634	-0.00914308	0.0195346	-0.0362998	-0.0118958	-0.00370007	0.00461461	0.00421398	-0.0116175	-0.00797281	0.0033083	-0.0146812	0.00591357
0	0	0	0	0.406109	0.948445	-0.0227141	0.0736083	-0.0207151	-0.0118328	0.0252959	-0.00747169	-0.0265393	0.0691285	-0.0122996	0.0573392	0.0286277	-0.0280116	-0.0457322	0.0193843	-0.0161104	0.0333454	-0.0415133	0.0339523	0.0901145	0.0856293	0.0846016	-0.0563314	-0.0771481	0.0851733	-0.0745917	0.0456507
0	0	0	0	0.406109	0.948445	-0.0227141	0.0465201	-0.0207151	-0.0118328	0.0273121	-0.00747169	-0.0265393	0.0442331	-0.0109375	0.0391542	0.0178373	-0.0172446	-0.0360074	0.0145852	-0.0120012	0.0262784	-0.0415133	-0.00686048	0.0314823	0.0352624	0.0309066	-0.0383833	-0.0353972	0.0296422	-0.0366225	0.021395
0	0	0	0	0.406109	0.948445	-0.0227141	0.0684405	-0.0207151	-0.0118328	0.0245125	-0.00747169	-0.0265393	0.0623758	-0.0125083	0.0543338	0.0264537	-0.0277009	-0.0438875	0.018789	-0.0172686	0.0338646	-0.0415133	0.0335743	0.09064	0.083525	0.0815206	-0.0493896	-0.0727107	0.0818132	-0.07298	0.0432261
0	0	0	0	0.406109	0.948445	-0.0227141	0.0164094	-0.0207151	-0.0118328	0.0306816	-0.00747169	-0.0265393	0.0133987	-0.0120053	0.0246636	0.011135	-0.0158184	-0.0283132	0.00901568	-0.00983203	0.0217316	-0.0415133	-0.0102839	-0.000995756	0.00787041	0.00767247	-0.016688	-0.0124128	0.00708384	-0.0187906	0.00690737
0	0	0	0	0.406109	0.948445	-0.0227141	0.0552928	-0.0207151	-0.0118328	0.0324359	-0.00747169	-0.0265393	0.0661442	-0.0142398	0.05201	0.0274853	-0.0216931	-0.0438192	0.0171725	-0.012698	0.0325126	-0.0415133	-0.00634531	0.0474193	0.0477815	0.0404407	-0.0486465	-0.0458614	0.0392469	-0.0445245	0.0274152
0	0	0	0	0.406109	0.948445	-0.0227141	0.0814464	-0.0207151	-0.0118328	0.0265222	-0.00747169	-0.0265393	0.0805994	-0.0134341	0.0622069	0.0318363	-0.0287031	-0.048862	0.0207168	-0.0156371	0.0352033	-0.0415133	0.0350267	0.0975263	0.0922449	0.0905349	-0.0630142	-0.083638	0.0907454	-0.0778639	0.0498617
0	0	0	0	0.406109	0.948445	-0.0227141	0.0299874	-0.0207151	-0.0118328	0.0426141	-0.00747169	-0.0265393	0.0365723	-0.0177492	0.0308346	0.00985718	-0.0186032	-0.0366376	0.0104942	-0.0121111	0.0261393	-0.0415133	-0.0131916	0.00906875	0.0161276	0.0127358	-0.0260064	-0.0191123	0.012013	-0.0193051	0.0134569
0	0	0	0	0.406109	0.948445	-0.0227141	0.0337143	-0.0207151	-0.0118328	0.0435528	-0.00747169	-0.0265393	0.0377274	-0.0174992	0.037831	0.0141856	-0.0252085	-0.0392622	0.0126062	-0.0145901	0.0311928	-0.0415133	0.000348822	0.0306929	0.0322886	0.0292781	-0.0248022	-0.0295335	0.028776	-0.0327087	0.0199446
0	0	0	0	0.406109	0.948445	-0.0227141	0.0527985	-0.0207151	-0.0118328	0.0150831	-0.00747169	-0.0265393	0.0376314	-0.00720001	0.038187	0.0192827	-0.0172781	-0.0329124	0.0157114	-0.012956	0.0241868	-0.0415133	0.011853	0.0498897	0.0521646	0.0507505	-0.044635	-0.0508983	0.0505867	-0.0504168	0.0290711
0	0	0	0	0.406109	0.948445	-0.0227141	0.0370267	-0.0207151	-0.0118328	0.0100691	-0.00747169	-0.0265393	0.0149935	-0.00421148	0.0289583	0.0181978	-0.0104547	-0.026114	0.013861	-0.0129912	0.0200957	-0.0415133	0.00370388	0.0278355	0.0318037	0.0300905	-0.030122	-0.0322698	0.0299558	-0.0369576	0.0165162
0	0	0	0	0.406109	0.948445	-0.0227141	0.0495862	-0.0207151	-0.0118328	0.0452377	-0.00747169	-0.0265393	0.0536888	-0.0184281	0.045762	0.0167808	-0.0278235	-0.0447756	0.0152841	-0.016265	0.0340189	-0.0415133	0.00965775	0.0544465	0.0523377	0.0484586	-0.0358151	-0.0457952	0.0481501	-0.0450917	0.0310673
0	0	0	0	0.406109	0.948445	-0.0227141	0.013753	-0.0207151	-0.0111585	0.0515409	-0.00747169	-0.0265393	0.0235771	-0.0189801	0.0263094	0.00965418	-0.0190835	-0.0347741	0.00863426	-0.0105656	0.0267321	-0.0147762	-0.0187508	-0.00899661	-0.00103468	-0.00291472	-0.00822609	-0.00176234	-0.00423522	-0.00751485	0.00430769
0	0	0	0	0.406109	0.948445	-0.0227141	0.0534031	-0.0207151	-0.0118328	0.045448	-0.00747169	-0.0265393	0.0580124	-0.0180647	0.0479615	0.0186883	-0.0273132	-0.0462596	0.0154099	-0.0154274	0.0328008	-0.0415133	0.00999932	0.0556079	0.0546574	0.0506048	-0.0414886	-0.0497917	0.0505051	-0.0478022	0.0322457
0	0	0	0	0.406109	0.948445	-0.0227141	0.00976877	-0.0207151	-0.00936559	0.0443618	-0.00747169	-0.0265393	0.0193445	-0.0179773	0.02195	0.00776846	-0.0157351	-0.0311288	0.00729591	-0.00928298	0.0242912	-0.00193708	-0.0218301	-0.0114581	-0.00608447	-0.00754296	-0.0067318	0.0019217	-0.0091182	-0.00396712	0.00195114
0	0	0	0	0.406109	0.948445	-0.0227141	0.0125267	-0.0207151	-0.0118328	0.0340563	-0.00747169	-0.0265393	0.0132169	-0.0138319	0.0229995	0.00932908	-0.0155509	-0.0280421	0.00821189	-0.0094718	0.0229066	-0.0284247	-0.0140267	-0.00737801	0.00158665	0.00145571	-0.0103588	-0.00550851	0.000217055	-0.0122372	0.00455934
0	0	0	0	0.406109	0.948445	-0.0227141	-0.00674482	-0.0207151	-0.00408366	-0.00161592	-0.00747169	-0.0237746	-0.00968885	-0.00712398	0.00274768	-0.00679828	-0.00958879	-0.00817988	-9.8752e-05	-0.00131103	0.00564602	0.00629151	-0.0229849	-0.0114581	-0.00959933	-0.0103088	-0.00576901	0.00426348	-0.0119957	-0.000956917	0.000662025
0	0	0	0	0.406109	0.948445	-0.0227141	0.0621793	-0.0207151	-0.0118328	0.0338839	-0.00747169	-0.0265393	0.0650304	-0.015702	0.0537344	0.0254517	-0.028831	-0.0462944	0.017335	-0.0155969	0.033846	-0.0415133	0.0209849	0.0758508	0.0718386	0.0684068	-0.049711	-0.0645766	0.0683943	-0.0628404	0.0392528
0	0	0	0	0.406109	0.948445	-0.0227141	0.00278122	-0.0207151	-0.00588564	-0.00817162	-0.00747169	-0.0244832	-0.017536	-0.00129071	0.00468093	0.00722496	0.00186922	-0.00882096	0.0045535	-0.00397292	0.00585643	-0.0141825	-0.0151046	-0.0112942	-0.00230881	-0.00212777	-0.00812979	-0.00185981	-0.0035321	-0.010122	0.00147899
0	1	0	0	0.406109	0.948445	-0.0158724	-0.00653339	-0.0207151	-0.00147405	-0.0207441	-0.00747169	-0.00602663	-0.017536	0.00613676	-0.00561578	-0.00190014	0.00621187	0.00466693	0.000886786	-0.00172581	-0.00194257	-0.00239382	-0.008712	-0.0114581	-0.0141904	-0.00785012	-0.00216665	0.00414962	-0.00837899	-0.00950359	-0.00791775
0	0	0	0	0.406109	0.948445	-0.0227141	0.0346949	-0.0207151	-0.0118328	0.0351533	-0.00747169	-0.0265393	0.034837	-0.0144076	0.0372039	0.0161757	-0.0220313	-0.0366199	0.01325	-0.0139034	0.0292502	-0.0415133	-0.00183918	0.033902	0.0345853	0.0300681	-0.0291474	-0.031807	0.0295924	-0.0343974	0.0206669
0	0	0	0	0.406109	0.948445	-0.0227141	0.0189221	-0.0207151	-0.0118328	0.0482235	-0.00747169	-0.0265393	0.0267374	-0.0186901	0.0284722	0.00973403	-0.0206164	-0.0354553	0.0094487	-0.0115866	0.0276023	-0.0395848	-0.0132717	0.00194198	0.00810616	0.00593003	-0.0125299	-0.00930352	0.00482627	-0.0140792	0.00869383
0	0	0	0	0.406109	0.948445	-0.0227141	0.0748832	-0.0207151	-0.0118328	0.0409723	-0.00747169	-0.0265393	0.0861194	-0.0188653	0.064539	0.0301416	-0.0324115	-0.0538351	0.0192554	-0.0162862	0.0386371	-0.0415133	0.0244984	0.0942491	0.0865424	0.0812063	-0.0587271	-0.0758082	0.0811749	-0.0704506	0.0477771
0	0	0	0	0.406109	0.948445	-0.0227141	0.00146601	-0.0207151	-0.0040348	0.0205033	-0.00747169	-0.0265393	0.00292027	-0.0118853	0.0104895	-0.000481537	-0.0102463	-0.0184569	0.00250373	-0.00420909	0.0117754	0.00308013	-0.0215784	-0.0114581	-0.00883587	-0.0092711	-0.00554763	0.00360997	-0.0108221	-0.00200976	0.000838518
0	0	0	0	0.406109	0.948445	-0.0227141	0.0280583	-0.0207151	-0.0118328	0.0230846	-0.00747169	-0.0265393	0.0176918	-0.00954461	0.0288696	0.0150411	-0.0153635	-0.0293236	0.0117529	-0.0120774	0.0224066	-0.0415133	-0.00487112	0.0204119	0.0243005	0.0213643	-0.0246847	-0.0245599	0.0207629	-0.0286542	0.0151185
0	0	0	0	0.406109	0.948445	-0.0227141	0.00432698	-0.0207151	-0.00690403	0.0115541	-0.00747169	-0.0265393	-0.0100605	-0.00636893	0.0123115	0.00724387	-0.00477517	-0.0161021	0.00548539	-0.00646183	0.0138509	-0.0034783	-0.0183473	-0.0114581	-0.00671891	-0.0069787	-0.00534033	0.0021512	-0.00842401	-0.00546858	7.01811e-05
0	0	0	0	0.406109	0.948445	-0.0227141	0.00607083	-0.0207151	-0.00454627	0.0241154	-0.00747169	-0.0265393	0.00771513	-0.0132283	0.0135151	0.000622123	-0.0115785	-0.0214204	0.00339933	-0.00572196	0.0142704	-0.00527421	-0.019881	-0.0114581	-0.00611444	-0.00656917	-0.00767197	0.000914301	-0.0080072	-0.00397657	0.00225626
0	1	1	0	0.406109	0.948445	-0.0208399	-0.00695978	-0.0207151	0.000237149	-0.0207441	-0.00747169	-0.0098987	-0.017536	0.00274972	-0.00412604	0.00456624	0.00882368	0.000473877	0.0013156	-0.0010538	-0.000888942	0.00525254	-0.0153332	-0.0114581	-0.00966681	-0.00803868	-0.000608829	0.00523389	-0.0097244	-0.00619249	-0.00368509
0	1	0	0	0.406109	0.948445	-0.0227141	-0.0134797	-0.0207151	-0.00281929	-0.0183054	-0.00747169	-0.0141168	-0.017536	-0.00105515	-0.00208279	-0.00949019	-0.00786578	0.000781258	-0.00173106	0.00136964	0.000231091	0.00914553	-0.0220858	-0.0114581	-0.0116377	-0.0113539	-0.00405683	0.00562644	-0.0129794	-0.000819245	-0.000870064
0	0	1	1	0.406109	0.948445	-0.0227141	0.000499212	-0.0207151	-0.00614456	-0.00657496	-0.00747169	-0.0240611	-0.017536	0.000824453	0.00474614	0.0111042	0.00478873	-0.00921964	0.00583204	-0.00611039	0.00688417	-0.0352917	0.0132545	-0.0114581	-0.00720824	0.00289038	0.00477582	-0.000491783	0.00339795	-0.0222177	-0.0118985
0	0	0	0	0.406109	0.948445	-0.0227141	0.0105168	-0.0207151	-0.00723577	0.0201462	-0.00747169	-0.0265393	0.00663586	-0.011452	0.0157077	0.00290287	-0.0115606	-0.021307	0.00503958	-0.00681365	0.0157406	-0.0241117	-0.0147489	-0.0108653	-0.000458502	-0.000222142	-0.0109562	-0.00459008	-0.00133721	-0.0094867	0.00456591
0	0	0	0	0.406109	0.948445	-0.0227141	0.0748155	-0.0207151	-0.0118328	0.027409	-0.00747169	-0.0265393	0.0770668	-0.0138807	0.0604802	0.0309424	-0.027982	-0.0476978	0.0192692	-0.0150622	0.0347674	-0.0415133	0.0260568	0.0886437	0.0836365	0.0799449	-0.0597386	-0.0760618	0.0799234	-0.0719339	0.0450499
0	0	0	0	0.406109	0.948445	-0.0227141	0.0102039	-0.0207151	-0.00947928	0.0232575	-0.00747169	-0.0265393	-0.00126676	-0.00882078	0.0176268	0.00874532	-0.00914723	-0.0220165	0.00705987	-0.00835291	0.016826	-0.0187727	-0.0149707	-0.00959808	-0.00104062	-0.00159342	-0.00797168	-0.00244724	-0.00289207	-0.00916847	0.00289446
0	0	0	0	0.406109	0.948445	-0.0227141	0.0439305	-0.0207151	-0.0118328	0.0364341	-0.00747169	-0.0265393	0.0451987	-0.0141737	0.042371	0.0185923	-0.0225106	-0.040087	0.014362	-0.0140856	0.0294146	-0.0415133	0.000154459	0.041567	0.0423206	0.0374682	-0.0358526	-0.0388883	0.0371984	-0.0404367	0.0249001
0	0	0	0	0.406109	0.948445	-0.0227141	0.00880093	-0.0207151	-0.0118328	-0.0109943	-0.00747169	-0.0265393	-0.017536	0.00159114	0.00770959	0.00989187	0.00108489	-0.00899923	0.00730145	-0.00864065	0.00924326	-0.0415133	0.0159557	-0.00385452	0.0061867	0.0143675	-0.00345028	-0.0109137	0.0145752	-0.0279454	-0.00306402
0	0	0	0	0.406109	0.948445	-0.0227141	0.0663134	-0.0207151	-0.0118328	0.0383445	-0.00747169	-0.0265393	0.0761919	-0.0179963	0.0593713	0.0266597	-0.0317696	-0.0498715	0.0182441	-0.0165167	0.0380858	-0.0415133	0.0213697	0.0829995	0.0770928	0.0723777	-0.0530076	-0.0685816	0.0723412	-0.0660309	0.0417975
0	0	0	0	0.406109	0.948445	-0.0227141	-0.000366599	-0.0207151	-0.00415676	0.0131727	-0.00747169	-0.0265393	-0.00139901	-0.00993897	0.00835117	-0.00307553	-0.010621	-0.0152436	0.00167666	-0.00356874	0.00972322	0.00379309	-0.0226177	-0.0114581	-0.00884597	-0.00966578	-0.00650107	0.00346772	-0.0112495	-0.0016114	0.00101566
0	0	0	0	0.406109	0.948445	-0.0227141	0.00421323	-0.0207151	-0.00459865	0.0128245	-0.00747169	-0.0265393	-0.00941897	-0.00690719	0.0104642	0.00505878	-0.00452482	-0.015998	0.00413322	-0.00529329	0.0106312	-0.0036805	-0.0171097	-0.0114581	-0.00726768	-0.00655226	-0.0049056	0.00210517	-0.00786798	-0.00538414	0.00016447
0	0	0	0	0.406109	0.948445	-0.0227141	0.0647902	-0.0207151	-0.0118328	-0.00852645	-0.00747169	-0.0265393	0.0291479	0.000348931	0.0382648	0.0265855	-0.0136553	-0.026931	0.0189311	-0.0162104	0.0223932	-0.0415133	0.0410512	0.0816461	0.0772272	0.0791819	-0.0443807	-0.0690423	0.0798605	-0.075915	0.0352854
0	0	0	0	0.406109	0.948445	-0.0227141	-0.00689813	-0.0207151	-0.00390526	-1.91619e-05	-0.00747169	-0.0245436	-0.00939576	-0.00740615	0.00334346	-0.00655617	-0.00985271	-0.00876241	-0.000125469	-0.00138412	0.00618365	0.00744474	-0.0227794	-0.0114581	-0.0101068	-0.0106824	-0.00487725	0.00484535	-0.0123618	-0.000545837	0.000415411
0	0	0	0	0.406109	0.948445	-0.0227141	0.0166254	-0.0207151	-0.0118328	0.0481739	-0.00747169	-0.0265393	0.0254403	-0.0184948	0.0283784	0.0106241	-0.0204496	-0.0349816	0.00941999	-0.0112743	0.0277389	-0.0341393	-0.0145743	-0.00229911	0.00501912	0.00326577	-0.0121642	-0.00760853	0.00214529	-0.0129911	0.00687574
0	0	0	0	0.406109	0.948445	-0.0227141	0.0873975	-0.0207151	-0.0118328	0.0282363	-0.00747169	-0.0265393	0.0941282	-0.0154435	0.0698357	0.0357918	-0.0326511	-0.052904	0.0210425	-0.0151224	0.0379732	-0.0415133	0.04181	0.110962	0.10349	0.101707	-0.0683251	-0.0932346	0.102082	-0.0870128	0.0545821
0	0	0	0	0.406109	0.948445	-0.0227141	0.00932013	-0.0207151	-0.00849405	0.0171056	-0.00747169	-0.0265393	-0.00301736	-0.00748046	0.0156148	0.00562994	-0.00979083	-0.0193517	0.00582498	-0.00696749	0.0142774	-0.0321348	-0.00678973	-0.0114581	-0.00277963	0.00178867	-0.00869956	-0.00522903	0.00119656	-0.0147831	0.000555753
0	0	0	0	0.406109	0.948445	-0.0227141	0.040576	-0.0207151	-0.0118328	0.0363623	-0.00747169	-0.0265393	0.0402526	-0.0153806	0.0403185	0.0166024	-0.0249161	-0.0390389	0.0138407	-0.015203	0.0309153	-0.0415133	0.0081411	0.0424562	0.0429863	0.0407884	-0.0308266	-0.0394874	0.0404792	-0.0422747	0.0246109
0	0	0	0	0.406109	0.948445	-0.0227141	0.027406	-0.0207151	-0.0118328	0.0484101	-0.00747169	-0.0265393	0.03567	-0.0192885	0.0302137	0.00959913	-0.0189658	-0.0378644	0.0100288	-0.0123009	0.0269031	-0.0415133	-0.0124298	0.00805949	0.0142367	0.0110788	-0.020286	-0.0157456	0.0102462	-0.0174923	0.0125408
0	0	0	0	0.406109	0.948445	-0.0227141	-0.0048149	-0.0207151	-0.00370894	0.00552671	-0.00747169	-0.0264931	-0.00669634	-0.00809327	0.00522911	-0.0055733	-0.0106829	-0.0112416	0.000458607	-0.00195503	0.00699671	0.00727489	-0.0236396	-0.0114581	-0.00974386	-0.0107136	-0.00560916	0.00455731	-0.0124446	-0.000941798	0.000539928
0	0	0	0	0.406109	0.948445	-0.0227141	0.0652498	-0.0207151	-0.0118328	0.034242	-0.00747169	-0.0265393	0.067045	-0.0151828	0.0559588	0.0263919	-0.0288913	-0.0470448	0.0182807	-0.0162427	0.0345137	-0.0415133	0.0182412	0.0793719	0.0739556	0.0690254	-0.0515676	-0.0652177	0.0688665	-0.0623204	0.0408514
0	1	1	1	0.406109	0.948445	-0.0205886	-0.0154639	-0.0207151	-0.00259783	-0.0207441	-0.00747169	-0.0096138	-0.017536	0.00032906	-0.00432231	-0.0099478	-0.00656323	0.0023719	-0.00256518	0.00195571	-0.0023529	0.0115131	-0.0231978	-0.0114581	-0.0112259	-0.0116678	-0.00365484	0.00605522	-0.0134039	-0.000206399	-0.000439017
0	0	0	0	0.406109	0.948445	-0.0227141	0.00151446	-0.0207151	-0.00446036	0.0209455	-0.00747169	-0.0265393	0.0055008	-0.0129804	0.0104619	-0.000609865	-0.0103423	-0.0190522	0.00253119	-0.00439307	0.0128781	0.00543146	-0.0228719	-0.0114581	-0.00889505	-0.00995054	-0.00518721	0.004211	-0.0116151	-0.00136678	0.000985251
0	0	0	0	0.406109	0.948445	-0.0227141	0.0166118	-0.0207151	-0.0118328	0.0504083	-0.00747169	-0.0265393	0.0266468	-0.01914	0.0281768	0.0101951	-0.0204861	-0.0357218	0.00933685	-0.0112413	0.027623	-0.029545	-0.0167898	-0.00238554	0.00423461	0.00172075	-0.0115207	-0.00628457	0.000433084	-0.0116754	0.00668064
0	0	0	0	0.406109	0.948445	-0.0227141	-0.0060197	-0.0207151	-0.00430772	0.00297019	-0.00747169	-0.0262844	-0.00786702	-0.00796996	0.00421252	-0.0058435	-0.0100922	-0.0100496	0.000301259	-0.00184295	0.00704963	0.00746617	-0.0229325	-0.0114581	-0.0100208	-0.010716	-0.00491897	0.00483641	-0.0123781	-0.000586842	0.000444078
0	0	0	0	0.406109	0.948445	-0.0227141	0.0180359	-0.0207151	-0.0118328	-0.000792654	-0.00747169	-0.0265393	-0.0117529	-0.000969308	0.01536	0.0111648	-0.0046635	-0.0156228	0.00917612	-0.0105934	0.0138513	-0.0415133	0.0186767	0.00226404	0.0141976	0.0234403	-0.0113632	-0.0202874	0.0237204	-0.0358651	0.00286952
0	1	1	1	0.406109	0.948445	-0.00645966	-0.0183139	-0.00505626	-0.00157393	-0.0207441	-0.00747169	-0.00100616	-0.017536	0.00514065	-0.00956524	-0.0103317	-0.000470833	0.00937213	-0.00351687	0.00324488	-0.00698255	0.0119455	-0.0219936	-0.0114581	-0.0113382	-0.0115261	-0.00277098	0.00636772	-0.0132414	-0.00029628	-0.000992852
0	0	0	0	0.406109	0.948445	-0.0227141	0.0654571	-0.0207151	-0.0118328	0.0416852	-0.00747169	-0.0265393	0.0733258	-0.0181772	0.0584475	0.0262151	-0.0314858	-0.0504586	0.0180712	-0.0165232	0.0367723	-0.0415133	0.0203414	0.0814741	0.0757149	0.0707953	-0.0513162	-0.0663492	0.0709034	-0.0630185	0.0420949
0	0	0	0	0.406109	0.948445	-0.0227141	0.0119929	-0.0207151	-0.0107537	0.0458214	-0.00747169	-0.0265393	0.0196854	-0.01751	0.0244558	0.00831882	-0.0181354	-0.0319825	0.0080243	-0.00971587	0.024982	-0.0141267	-0.0185093	-0.0112366	-0.00229455	-0.00344876	-0.00875825	-0.00166574	-0.00479295	-0.00732463	0.00352885
0	0	0	0	0.406109	0.948445	-0.0227141	0.0251637	-0.0207151	-0.0118328	0.0420185	-0.00747169	-0.0265393	0.0254731	-0.0147169	0.0314621	0.0128179	-0.0193192	-0.0349062	0.01118	-0.0125702	0.0260115	-0.0415133	-0.0107332	0.0107524	0.0160505	0.012776	-0.0201079	-0.0170167	0.0120896	-0.0210228	0.0118716
0	0	0	0	0.406109	0.948445	-0.0227141	0.0351155	-0.0207151	-0.0118328	0.0461402	-0.00747169	-0.0265393	0.0452779	-0.0182656	0.0403652	0.0161203	-0.0241883	-0.041421	0.0132296	-0.014087	0.0321842	-0.0415133	-0.00614133	0.0300735	0.0318265	0.0267896	-0.0298504	-0.0298476	0.0259987	-0.0312676	0.0204067
0	0	0	0	0.406109	0.948445	-0.0227141	0.132059	-0.00100246	-0.0118328	-0.0207441	-0.00747169	-0.0265393	0.161673	0.0389754	0.0944138	0.136929	0.0164205	-0.0445973	0.0569572	0.0241425	0.0258028	-0.0415133	0.0869961	0.119847	0.128614	0.143072	-0.110291	-0.137048	0.146739	-0.149298	0.0455307
0	0	0	0	0.406109	0.948445	-0.0227141	0.106793	-0.0207151	-0.0118328	-0.0173533	-0.00747169	-0.0265393	0.0860854	0.00464848	0.0627556	0.051377	-0.0122783	-0.0362312	0.0281123	-0.0120828	0.0270889	-0.0415133	0.0650536	0.103894	0.105373	0.113875	-0.0759864	-0.103774	0.115946	-0.107418	0.046147
0	1	1	1	0.406109	0.948445	-0.0184151	-0.0156934	-0.0207151	-0.00229338	-0.0207441	-0.00747169	-0.00846113	-0.017536	0.0015911	-0.00473713	-0.0091814	-0.00500705	0.00347193	-0.00232774	0.00221676	-0.00291458	0.01225	-0.0232203	-0.0114581	-0.0116317	-0.0117767	-0.00355904	0.00621497	-0.0135431	-0.000541316	-0.000790886
0	0	0	0	0.406109	0.948445	-0.0227141	0.106686	-0.0207151	-0.0118328	-0.0138278	-0.00747169	-0.0265393	0.0806708	0.000840823	0.0626518	0.0469709	-0.0195394	-0.0386227	0.0270462	-0.0138305	0.0280218	-0.0415133	0.0636157	0.128766	0.120468	0.123488	-0.0773134	-0.110181	0.12432	-0.106098	0.0584468
0	0	0	0	0.406109	0.948445	-0.0227141	0.0227654	-0.0207151	-0.0118328	0.0437358	-0.00747169	-0.0265393	0.0280973	-0.0170989	0.030749	0.0112224	-0.0208811	-0.0353112	0.0106228	-0.0122519	0.0280646	-0.0415133	-0.0100358	0.0079561	0.0139378	0.0116993	-0.01764	-0.0152494	0.0108752	-0.0192488	0.0113495
0	0	0	0	0.406109	0.948445	-0.0227141	0.00886908	-0.0207151	-0.00956012	0.0423909	-0.00747169	-0.0265393	0.0158041	-0.0165881	0.0222349	0.0081862	-0.0166651	-0.0299042	0.00736216	-0.00885704	0.0234816	-0.00692428	-0.0196451	-0.0114581	-0.00518149	-0.00599004	-0.00720478	0.000620185	-0.00734898	-0.00572723	0.00195642
0	0	0	0	0.406109	0.948445	-0.0227141	0.0241745	-0.0207151	-0.0118328	0.0169708	-0.00747169	-0.0265393	0.00760151	-0.00697804	0.0228831	0.011318	-0.0110375	-0.0242264	0.0101976	-0.010397	0.0184336	-0.0415133	-0.00513008	0.0116467	0.0177542	0.0164837	-0.0204008	-0.0195433	0.0158321	-0.0247752	0.0116955
0	0	0	0	0.406109	0.948445	-0.0227141	0.0177172	-0.0207151	-0.0118328	0.052071	-0.00747169	-0.0265393	0.028165	-0.0194729	0.0279959	0.00983894	-0.0189194	-0.0364121	0.00923029	-0.011497	0.0274348	-0.0230542	-0.0183227	-0.00664442	0.00166132	-0.000394911	-0.0125665	-0.00510767	-0.00164279	-0.00916073	0.00597988
0	0	0	0	0.406109	0.948445	-0.0227141	0.0249966	-0.0207151	-0.0118328	0.0400042	-0.00747169	-0.0265393	0.0272408	-0.0157115	0.0291591	0.00995831	-0.0184089	-0.0338479	0.0101122	-0.0117565	0.0257926	-0.0415133	-0.0104514	0.0101792	0.0156277	0.012691	-0.0187161	-0.0162445	0.0119819	-0.0201875	0.012344
0	0	0	0	0.406109	0.948445	-0.0227141	0.0639508	-0.0207151	-0.0118328	0.0428956	-0.00747169	-0.0265393	0.0757958	-0.0192731	0.0585477	0.0257149	-0.0310117	-0.0507001	0.01811	-0.0169559	0.0387045	-0.0415133	0.0168289	0.0765475	0.0716798	0.0665858	-0.0507572	-0.0634051	0.0664577	-0.0596743	0.0403557
0	0	0	0	0.406109	0.948445	-0.0227141	-0.00540201	-0.0207151	-0.00319668	0.00212474	-0.00747169	-0.0252399	-0.00731632	-0.00830029	0.00383084	-0.00567769	-0.00890303	-0.00990469	4.62254e-07	-0.00177088	0.00653313	0.00708919	-0.0226569	-0.0114581	-0.00991278	-0.0105198	-0.00487726	0.00474559	-0.0121714	-0.000666727	0.000512017
0	0	0	0	0.406109	0.948445	-0.0227141	0.0216075	-0.0207151	-0.0118328	0.0489851	-0.00747169	-0.0265393	0.029761	-0.0187034	0.0316454	0.0116412	-0.0228853	-0.0371037	0.0104795	-0.0123844	0.0292337	-0.0415133	-0.00964041	0.00801555	0.0134017	0.011054	-0.0156397	-0.0142795	0.0102948	-0.0193609	0.0107202
0	0	0	0	0.406109	0.948445	-0.0227141	0.0131649	-0.0207151	-0.0109805	0.0498444	-0.00747169	-0.0265393	0.0221239	-0.0184555	0.0255431	0.00917253	-0.0185543	-0.0338055	0.00847163	-0.010245	0.026113	-0.0145162	-0.0181086	-0.010264	-0.001711	-0.00305465	-0.00802624	-0.00159605	-0.0043243	-0.00744938	0.00391018
0	0	0	0	0.406109	0.948445	-0.0227141	-0.0124226	-0.0207151	-0.00406166	-0.0125539	-0.00747169	-0.0173114	-0.017536	-0.00355389	-0.000515504	-0.0104934	-0.0104956	-0.00254313	-0.00154625	0.000641703	0.00231402	0.0100369	-0.0234435	-0.0114581	-0.0108323	-0.0115064	-0.0043045	0.0056203	-0.013209	-8.88341e-05	2.51174e-05
0	0	0	0	0.406109	0.948445	-0.0227141	-0.0111316	-0.0207151	-0.00395337	-0.00953117	-0.00747169	-0.0189235	-0.0164947	-0.00467448	-0.000114869	-0.00936011	-0.00962954	-0.00387471	-0.00129496	0.000140522	0.00293248	0.00933054	-0.0232475	-0.0114581	-0.0106624	-0.0112822	-0.00453553	0.00538771	-0.0129805	-0.000162866	0.000126829
0	0	0	0	0.406109	0.948445	-0.0227141	-0.00434094	-0.0207151	-0.00138365	-0.00972925	-0.00747169	-0.0188759	-0.017536	-0.00323786	0.000870405	0.00147507	0.000652999	-0.00603847	0.000771459	-0.00181499	0.00284977	0.00600723	-0.0200186	-0.0114581	-0.0093069	-0.00916626	-0.00402027	0.00443849	-0.0108752	-0.00252274	-0.000506699
0	0	0	0	0.406109	0.948445	-0.0227141	0.00787207	-0.0207151	-0.00671919	0.0228248	-0.00747169	-0.0265393	0.0078104	-0.0117243	0.0142633	0.00293982	-0.00925207	-0.0217906	0.00475158	-0.00625721	0.015374	0.00329569	-0.0273228	-0.0114581	-0.00610042	-0.00931992	-0.00909514	0.00226941	-0.0114417	-0.00421097	0.00185652
0	0	0	0	0.406109	0.948445	-0.0227141	0.0355757	-0.0207151	-0.0118328	0.0448246	-0.00747169	-0.0265393	0.0420092	-0.0181444	0.0396376	0.0150461	-0.0256227	-0.0406595	0.0130164	-0.014749	0.0321185	-0.0415133	1.75902e-05	0.0301313	0.0327447	0.0295466	-0.0280847	-0.031357	0.0292627	-0.0336617	0.0202538
0	0	0	0	0.406109	0.948445	-0.0227141	0.0215989	-0.0207151	-0.0118328	0.0526384	-0.00747169	-0.0265393	0.0317336	-0.0196634	0.031971	0.0119654	-0.0221454	-0.038385	0.0106992	-0.012806	0.0298621	-0.0415133	-0.0158863	0.00376488	0.00923563	0.00565193	-0.0152166	-0.0103931	0.00447824	-0.0146783	0.00928116
0	0	0	0	0.406109	0.948445	-0.0227141	0.0167684	-0.0207151	-0.0112248	0.0133011	-0.00747169	-0.0265393	0.000393472	-0.00675595	0.0160953	0.00749948	-0.00735259	-0.0199616	0.00726415	-0.00802558	0.0136264	-0.0415133	-0.0113722	-0.000635746	0.00776606	0.00688648	-0.0162784	-0.011306	0.0060456	-0.0154055	0.00805202
0	0	0	0	0.406109	0.948445	-0.0227141	0.0924812	-0.0207151	-0.0118328	0.0168543	-0.00747169	-0.0265393	0.09568	-0.0107174	0.0700372	0.04184	-0.0264393	-0.0497687	0.0229462	-0.0133255	0.0352912	-0.0415133	0.0328111	0.110047	0.101805	0.0972164	-0.072525	-0.0919359	0.0971428	-0.0858293	0.0533542
0	0	0	0	0.406109	0.948445	-0.0227141	0.0132298	-0.0207151	-0.0116316	0.0513873	-0.00747169	-0.0265393	0.0248811	-0.0194508	0.0261501	0.00954049	-0.0189826	-0.0349106	0.0086438	-0.0104905	0.0268797	-0.0129981	-0.0197817	-0.0114581	-0.00255545	-0.00410827	-0.0095812	-0.00155841	-0.00551792	-0.00666423	0.00364133
0	0	0	0	0.406109	0.948445	-0.0227141	0.0115828	-0.0207151	-0.0100142	0.0484484	-0.00747169	-0.0265393	0.0214263	-0.0185377	0.0244149	0.0086666	-0.0179638	-0.0330873	0.00781791	-0.00990885	0.0254417	-0.00879991	-0.0201765	-0.0114581	-0.00371083	-0.00529688	-0.00749755	3.8379e-05	-0.00674668	-0.005937	0.00294852
0	0	0	0	0.406109	0.948445	-0.0227141	0.067862	-0.0207151	-0.0118328	-0.00823071	-0.00747169	-0.0265393	0.0342157	0.00201387	0.0395917	0.0274203	-0.012633	-0.0271989	0.0200406	-0.0157508	0.0221983	-0.0415133	0.0579984	0.0645009	0.0694211	0.0809156	-0.043959	-0.0703923	0.0826473	-0.0826956	0.0256263
0	0	0	0	0.406109	0.948445	-0.0227141	-0.00831621	-0.0207151	-0.00324733	-0.0022687	-0.00747169	-0.0216154	-0.0123646	-0.00632627	0.00213867	-0.00777989	-0.00998795	-0.00720828	-0.000818085	-0.000795264	0.00417116	0.00792946	-0.0228519	-0.0114581	-0.0103819	-0.0109277	-0.00487323	0.00498029	-0.0125649	-0.000455496	0.000268962
0	0	0	0	0.406109	0.948445	-0.0227141	-0.00408789	-0.0207151	-0.00368894	0.00398606	-0.00747169	-0.0258375	-0.0080704	-0.00727858	0.00489213	-0.00512686	-0.00947072	-0.0105612	0.00072396	-0.00197209	0.00647773	0.00670103	-0.0239465	-0.0114581	-0.00968758	-0.01072	-0.00638317	0.00421645	-0.0124215	-0.00135898	0.000456507
0	0	0	0	0.406109	0.948445	-0.0227141	-0.00767476	-0.0207151	-0.00342481	-0.00235194	-0.00747169	-0.0227663	-0.0110738	-0.00679737	0.0023296	-0.00706041	-0.00913469	-0.00751275	-0.000453068	-0.000989903	0.00515372	0.00786381	-0.0227243	-0.0114581	-0.0102885	-0.0108074	-0.00485505	0.0049364	-0.0124223	-0.000543293	0.000278412
0	0	0	0	0.406109	0.948445	-0.0227141	0.0653324	-0.0207151	-0.0118328	0.00117541	-0.00747169	-0.0265393	0.0422212	-0.00357618	0.0433489	0.0285629	-0.0177064	-0.0327432	0.0190889	-0.0144949	0.024543	-0.0415133	0.0298126	0.0764697	0.0736335	0.0734513	-0.0512606	-0.0684798	0.0735955	-0.0700666	0.0366663
0	0	0	0	0.406109	0.948445	-0.0227141	0.0477375	-0.0207151	-0.0118328	-0.012539	-0.00747169	-0.0265393	0.00728534	0.00239733	0.0261036	0.0210877	-0.00805503	-0.0203327	0.0160217	-0.0146184	0.0172887	-0.0415133	0.0560489	0.0488395	0.0547291	0.068508	-0.0256626	-0.0545411	0.0700172	-0.0736776	0.0171805
0	0	0	0	0.406109	0.948445	-0.0227141	0.0276438	-0.0207151	-0.0118328	0.0411338	-0.00747169	-0.0265393	0.0291808	-0.0148273	0.0334355	0.0130789	-0.02078	-0.0357311	0.01132	-0.0125794	0.0267339	-0.0415133	-0.003963	0.0107788	0.0186616	0.0177706	-0.0239099	-0.0222441	0.0178023	-0.026721	0.0122741
0	1	1	1	0.406109	0.948445	-0.0044743	-0.0148316	-0.0180277	0.00231359	-0.0207441	-0.00747169	0.00234352	-0.017536	0.00747218	-0.0104071	-0.0047151	0.00787322	0.0104248	-0.00258467	0.00251217	-0.00877935	0.00664751	-0.0127516	-0.0114581	-0.0133581	-0.0102066	0.00059495	0.00680983	-0.0112967	-0.00369655	-0.00557024
0	0	0	0	0.406109	0.948445	-0.0227141	0.0123782	-0.0207151	-0.00844771	0.0469763	-0.00747169	-0.0265393	0.0204742	-0.0181926	0.0227822	0.00756085	-0.0158286	-0.0322399	0.00718702	-0.00947002	0.0238849	-0.00651531	-0.0198914	-0.0114581	-0.00458333	-0.0058407	-0.00660046	0.000830761	-0.00725144	-0.0050326	0.00267115
0	0	0	0	0.406109	0.948445	-0.0227141	0.0118276	-0.0207151	-0.00820504	0.0350174	-0.00747169	-0.0265393	0.0186271	-0.0167176	0.0188206	0.00416486	-0.0133775	-0.0279089	0.0059214	-0.00829826	0.0204274	-0.00847178	-0.021231	-0.0114581	-0.00426256	-0.00558555	-0.010108	-0.000663835	-0.00717985	-0.00491966	0.00325779
0	1	0	0	0.406109	0.948445	-0.0227141	-0.0129922	-0.0207151	-0.00431698	-0.0136945	-0.00747169	-0.0169998	-0.017536	-0.00331768	-0.000778513	-0.0109122	-0.0107902	-0.00209309	-0.00166295	0.000774903	0.00229215	0.010348	-0.0235647	-0.0114581	-0.0108806	-0.0115927	-0.00421783	0.00571386	-0.0133216	-1.80946e-05	8.56905e-06
0	0	0	0	0.406109	0.948445	-0.0227141	0.0126749	-0.0207151	-0.0104719	0.0499879	-0.00747169	-0.0265393	0.023048	-0.0188641	0.025169	0.00924115	-0.0178527	-0.0340447	0.00808973	-0.0102057	0.025904	-0.0113734	-0.0200541	-0.0111505	-0.00265279	-0.00448137	-0.00838709	-0.000874734	-0.00590113	-0.00663729	0.00349249
0	0	0	0	0.406109	0.948445	-0.0227141	0.00191029	-0.0207151	-0.00234375	0.0149193	-0.00747169	-0.0265393	-0.00151115	-0.0104271	0.00878986	-9.86901e-05	-0.00733792	-0.0165903	0.00189337	-0.00426018	0.00965125	0.00326743	-0.021702	-0.0114581	-0.00819094	-0.0089498	-0.00516668	0.00359418	-0.0105683	-0.0022963	0.001071
0	0	0	0	0.406109	0.948445	-0.0227141	0.00962749	-0.0207151	-0.00808765	0.0291509	-0.00747169	-0.0265393	0.00741129	-0.0124816	0.017959	0.00580333	-0.0114602	-0.0241626	0.00623521	-0.00767778	0.0186799	-0.0121578	-0.0171082	-0.0114581	-0.00487866	-0.00455162	-0.00800599	-0.000598825	-0.00588964	-0.00679866	0.00191141
0	0	0	0	0.406109	0.948445	-0.0227141	0.00257657	-0.0207151	-0.00400818	0.024009	-0.00747169	-0.0265393	0.00561631	-0.0128721	0.0114871	-0.000232298	-0.0108751	-0.0201115	0.00266378	-0.00462217	0.0125224	0.00333297	-0.0220281	-0.0114581	-0.00859613	-0.00936895	-0.00563474	0.00362339	-0.0109207	-0.00181908	0.00108304
0	0	0	0	0.406109	0.948445	-0.0227141	0.0824888	-0.0207151	-0.0118328	0.0174297	-0.00747169	-0.0265393	0.0810492	-0.00927276	0.0618583	0.0364471	-0.0229399	-0.0456086	0.0217186	-0.0135436	0.0326406	-0.0415133	0.0299151	0.0912637	0.087461	0.0850181	-0.0647623	-0.0806389	0.08531	-0.0766548	0.0458352
0	0	0	0	0.406109	0.948445	-0.0227141	0.0313657	-0.0207151	-0.0118328	0.0195638	-0.00747169	-0.0265393	0.0187322	-0.00861393	0.0294651	0.015262	-0.015498	-0.0289592	0.0121126	-0.0121091	0.021997	-0.0415133	-0.000411515	0.0275565	0.0308638	0.0283194	-0.028631	-0.0303408	0.028028	-0.0330621	0.0186076
0	0	0	0	0.406109	0.948445	-0.0227141	-0.0104691	-0.0207151	-0.00356044	-0.008619	-0.00747169	-0.0192172	-0.015522	-0.00512043	6.11109e-05	-0.00900016	-0.00918823	-0.00433877	-0.00127809	-2.20144e-05	0.00306769	0.00884959	-0.023081	-0.0114581	-0.0106177	-0.0111748	-0.00466505	0.00525192	-0.0128537	-0.000233975	0.000156816
0	0	0	0	0.406109	0.948445	-0.0227141	-0.0124226	-0.0207151	-0.00406166	-0.0125539	-0.00747169	-0.0173114	-0.017536	-0.00355389	-0.000515504	-0.0104934	-0.0104956	-0.00254313	-0.00154625	0.000641703	0.00231402	0.0100369	-0.0234435	-0.0114581	-0.0108323	-0.0115064	-0.0043045	0.0056203	-0.013209	-8.88341e-05	2.51174e-05
0	0	0	0	0.406109	0.948445	-0.0227141	0.0117132	-0.0207151	-0.0104381	0.0374456	-0.00747169	-0.0265393	0.0149943	-0.0152646	0.0214571	0.00752706	-0.0146638	-0.0285656	0.00743449	-0.00872304	0.0221268	-0.0163673	-0.0170989	-0.0114581	-0.00279008	-0.00289232	-0.00932414	-0.00223906	-0.00423787	-0.00822372	0.00299062
0	0	0	0	0.406109	0.948445	-0.0227141	0.0407693	-0.0207151	-0.0118328	0.0508765	-0.00747169	-0.0265393	0.0483334	-0.019091	0.0429354	0.0160491	-0.0266442	-0.0443315	0.0136653	-0.0151422	0.0323484	-0.0415133	0.00118992	0.0382714	0.0393313	0.0353276	-0.0321761	-0.0360597	0.034968	-0.0359074	0.0246698
0	0	0	0	0.406109	0.948445	-0.0227141	0.0214271	-0.0207151	-0.0118328	0.0484237	-0.00747169	-0.0265393	0.0296584	-0.018337	0.0316137	0.0110793	-0.0227924	-0.0366446	0.0106502	-0.0121642	0.0289744	-0.0415133	-0.0121605	0.00645526	0.0121598	0.00954219	-0.017062	-0.0136566	0.00852053	-0.017521	0.0104953
0	1	0	1	0.406109	0.948445	-0.0227141	-0.0138029	-0.0207151	-0.00237666	-0.0174105	-0.00747169	-0.0110682	-0.017536	-0.000317402	-0.0025128	-0.0108747	-0.00864693	0.000425067	-0.00253065	0.00137973	-0.00191692	0.0107164	-0.0230213	-0.0114581	-0.0113384	-0.0116328	-0.0038273	0.00592673	-0.0133253	-0.000192556	-0.000405231
0	0	0	0	0.406109	0.948445	-0.0227141	0.0594356	-0.0207151	-0.0118328	0.0403228	-0.00747169	-0.0265393	0.0684599	-0.0185006	0.0548811	0.0241563	-0.0303853	-0.0481311	0.0174516	-0.0170081	0.037489	-0.0415133	0.0149841	0.0714771	0.0668349	0.0621236	-0.0467834	-0.0592192	0.0615658	-0.0571058	0.0372139
0	0	0	0	0.406109	0.948445	-0.0227141	-0.00341361	-0.0207151	-0.00338895	0.0071021	-0.00747169	-0.0265393	-0.00422794	-0.00938083	0.00557815	-0.00427611	-0.00909465	-0.0123218	0.000655756	-0.00251346	0.00812792	0.00669246	-0.0225091	-0.0114581	-0.00963217	-0.0102754	-0.00487841	0.00460065	-0.0119034	-0.000850094	0.000633324
0	0	0	0	0.406109	0.948445	-0.0227141	-0.00664329	-0.0207151	-0.00375318	0.00246293	-0.00747169	-0.0253633	-0.0100679	-0.00723392	0.00458895	-0.00588405	-0.0108358	-0.009412	0.000201108	-0.00148436	0.0064417	0.00693714	-0.0220924	-0.0114581	-0.0103725	-0.0105664	-0.00478538	0.00477352	-0.0121489	-0.000979135	6.48454e-05
0	0	0	0	0.406109	0.948445	-0.0227141	0.0207911	-0.0207151	-0.0118328	0.0473703	-0.00747169	-0.0265393	0.0283206	-0.0182945	0.0287612	0.00919955	-0.0198045	-0.0354389	0.0096367	-0.0114516	0.0271322	-0.0406812	-0.0149172	9.63654e-05	0.00732244	0.00495442	-0.0155633	-0.0101293	0.00386465	-0.013986	0.00842403
0	0	0	0	0.406109	0.948445	-0.0227141	0.0417929	-0.0207151	-0.0118328	0.0467739	-0.00747169	-0.0265393	0.0482019	-0.0190274	0.0441102	0.0171382	-0.0291436	-0.0437235	0.0145471	-0.0160766	0.034471	-0.0415133	0.0048513	0.0478974	0.0453924	0.0406348	-0.0300685	-0.0388964	0.0401741	-0.041119	0.0265723
0	0	0	0	0.406109	0.948445	-0.0227141	0.0104807	-0.0207151	-0.00878358	0.048323	-0.00747169	-0.0265393	0.0218912	-0.0192492	0.022659	0.00794702	-0.0162159	-0.0326992	0.00733492	-0.0096473	0.025216	-0.000944462	-0.02142	-0.0114581	-0.00632059	-0.00760916	-0.00587323	0.00238567	-0.00918499	-0.00337552	0.00198536
0	0	0	0	0.406109	0.948445	-0.0227141	-0.0116834	-0.0207151	-0.0047074	-0.0103158	-0.00747169	-0.0192849	-0.0169519	-0.00422446	0.00051452	-0.00995489	-0.0112246	-0.00381541	-0.00112352	0.000218468	0.00360899	0.00971648	-0.0234569	-0.0114581	-0.0107409	-0.0114441	-0.00444823	0.00550825	-0.0131527	-0.000127891	8.15238e-05
0	0	0	0	0.406109	0.948445	-0.0227141	0.00848581	-0.0207151	-0.0050334	0.0323187	-0.00747169	-0.0265393	0.0134804	-0.015644	0.0157887	0.00294676	-0.0115209	-0.0253631	0.00428377	-0.00682903	0.0169377	-0.00329569	-0.020616	-0.0114581	-0.00623014	-0.00702793	-0.00703275	0.00152475	-0.00856699	-0.003464	0.00228822
0	0	0	0	0.406109	0.948445	-0.0227141	-0.00702163	-0.0207151	-0.00221226	-0.0150811	-0.00747169	-0.0165616	-0.017536	-0.00147337	-0.000602526	-0.000247864	-0.000319464	-0.00329452	0.000396914	-0.00102917	0.00158659	0.00534901	-0.0198156	-0.0114581	-0.00957075	-0.0092429	-0.00442633	0.0042465	-0.0108952	-0.0026105	-0.000691654
0	0	0	0	0.406109	0.948445	-0.0227141	0.0184269	-0.0207151	-0.0118328	0.0128497	-0.00747169	-0.0265393	0.00168215	-0.007155	0.0201828	0.0134051	-0.0095474	-0.0223195	0.00907683	-0.0100819	0.0174081	-0.0415133	-0.00326625	0.0102759	0.0157974	0.015355	-0.0159515	-0.0170014	0.0146231	-0.0237611	0.0100371
0	0	0	0	0.406109	0.948445	-0.0227141	0.0566753	-0.0207151	-0.0118328	0.0135924	-0.00747169	-0.0265393	0.0343115	-0.00646144	0.0403795	0.0203043	-0.0196433	-0.0333235	0.0169042	-0.0157562	0.0254427	-0.0415133	0.0231597	0.0665343	0.0637691	0.0621383	-0.0409467	-0.0565206	0.0623356	-0.0569924	0.0339986
0	0	0	0	0.406109	0.948445	-0.0227141	0.0127112	-0.0207151	-0.0106155	0.0500429	-0.00747169	-0.0265393	0.0248263	-0.0196045	0.0246887	0.00862355	-0.0174514	-0.0341973	0.00816266	-0.0102705	0.0264139	-0.00680173	-0.0215041	-0.0114581	-0.00462484	-0.00627744	-0.00879362	0.000216652	-0.00778418	-0.0047285	0.00284295
0	0	0	0	0.406109	0.948445	-0.0227141	0.0293266	-0.0207151	-0.0118328	0.030747	-0.00747169	-0.0265393	0.0202355	-0.0116543	0.0304587	0.0131408	-0.0182277	-0.0318272	0.0114518	-0.0129814	0.0239407	-0.0415133	-0.0036901	0.0239826	0.0260338	0.0223779	-0.0220215	-0.0239832	0.0219323	-0.0278297	0.0163236
0	0	0	0	0.406109	0.948445	-0.0227141	0.0135036	-0.0207151	-0.0113365	0.050014	-0.00747169	-0.0265393	0.023095	-0.0188223	0.0263055	0.00977838	-0.0194248	-0.0344167	0.00853153	-0.0105643	0.0267504	-0.0185575	-0.0176267	-0.00824467	-0.00035661	-0.00206644	-0.0082997	-0.00254245	-0.00330636	-0.00887633	0.00425556
0	0	0	0	0.406109	0.948445	-0.0227141	-0.0060197	-0.0207151	-0.00430772	0.00297019	-0.00747169	-0.0262844	-0.00786702	-0.00796996	0.00421252	-0.0058435	-0.0100922	-0.0100496	0.000301259	-0.00184295	0.00704963	0.00746617	-0.0229325	-0.0114581	-0.0100208	-0.010716	-0.00491897	0.00483641	-0.0123781	-0.000586842	0.000444078
0	0	0	0	0.406109	0.948445	-0.0227141	-0.0123327	-0.0207151	-0.0044798	-0.0123442	-0.00747169	-0.0178254	-0.017536	-0.00365327	-0.000287591	-0.0105583	-0.0108856	-0.00278814	-0.00143864	0.000513165	0.00275907	0.0101263	-0.0235207	-0.0114581	-0.0108184	-0.0115344	-0.00430197	0.00563875	-0.0132508	-4.69931e-05	4.39064e-05
0	0	0	0	0.406109	0.948445	-0.0227141	0.000627486	-0.0207151	-0.00327084	0.014445	-0.00747169	-0.0265393	0.00167487	-0.0115154	0.00829544	-0.00193257	-0.00883332	-0.0162859	0.00163442	-0.00385134	0.0105985	0.00541325	-0.0224704	-0.0114581	-0.00896629	-0.00978594	-0.0052281	0.00414884	-0.0114151	-0.00126454	0.000962923
0	1	1	1	0.406109	0.948445	-0.00629316	-0.0184626	-0.00821054	-0.000960086	-0.0207441	-0.00747169	-0.000218836	-0.017536	0.0063303	-0.00864174	-0.0106009	-0.00180765	0.0100944	-0.00348521	0.00356783	-0.007515	0.010883	-0.0209629	-0.0114581	-0.0120337	-0.011495	-0.00268882	0.00635036	-0.0131303	-0.000889789	-0.00167193
0	0	0	0	0.406109	0.948445	-0.0227141	0.00329761	-0.0207151	-0.00816283	0.00324025	-0.00747169	-0.0265393	-0.017536	-0.00341721	0.0103389	0.00539896	-0.00393896	-0.0117213	0.005143	-0.0067995	0.0128859	-0.00841397	-0.0152665	-0.0114581	-0.00590127	-0.00507526	-0.00493442	0.00109677	-0.00639856	-0.0072921	-7.64298e-05
0	0	0	0	0.406109	0.948445	-0.0227141	0.00387843	-0.0207151	-0.00526565	0.0233049	-0.00747169	-0.0265393	0.00736917	-0.0134542	0.0121087	0.000220276	-0.0109415	-0.0207468	0.00324052	-0.00546401	0.0143859	0.00215539	-0.0221824	-0.0114581	-0.00805845	-0.00893196	-0.00632122	0.00310116	-0.0105909	-0.00189305	0.00143887
0	0	0	0	0.406109	0.948445	-0.0227141	0.0112667	-0.0207151	-0.0116789	0.0293359	-0.00747169	-0.0265393	0.00850814	-0.0121195	0.0210415	0.00855441	-0.0137564	-0.0254943	0.00778974	-0.00884624	0.0210628	-0.0283254	-0.0124565	-0.0105389	-3.37778e-05	0.000991799	-0.0105151	-0.00529322	-5.69877e-05	-0.0120335	0.00346469
0	0	0	0	0.406109	0.948445	-0.0227141	0.0888517	-0.0207151	-0.0118328	0.0348148	-0.00747169	-0.0265393	0.101011	-0.0180201	0.0730193	0.0363426	-0.0348309	-0.0565152	0.0213878	-0.0156211	0.0402838	-0.0415133	0.0368912	0.117885	0.106945	0.101823	-0.0695938	-0.093448	0.102041	-0.0855792	0.0577392
0	0	0	0	0.406109	0.948445	-0.0227141	0.0437298	-0.0207151	-0.0118328	0.0249874	-0.00747169	-0.0265393	0.0341881	-0.0100872	0.0391234	0.0194987	-0.0198426	-0.0351605	0.0146152	-0.0143214	0.0265815	-0.0415133	0.0137581	0.0420162	0.04418	0.0442013	-0.0322134	-0.0421487	0.0440595	-0.0479536	0.0227595
0	0	0	0	0.406109	0.948445	-0.0227141	0.119207	-0.0207151	-0.0118328	-0.0207441	-0.00747169	-0.0265393	0.103907	0.0195036	0.0666472	0.0813994	0.00494883	-0.0325316	0.0388849	-0.00237393	0.0234501	-0.0415133	0.10933	0.0843037	0.100853	0.128622	-0.0740035	-0.113309	0.133402	-0.139654	0.0256187
0	0	0	0	0.406109	0.948445	-0.0227141	0.00563994	-0.0207151	-0.00468128	0.0269453	-0.00747169	-0.0265393	0.0106747	-0.0142714	0.0135623	0.000846881	-0.0113511	-0.0226233	0.00350037	-0.00553165	0.0145611	0.00340939	-0.0242356	-0.0114581	-0.00755015	-0.00941858	-0.0070839	0.00308291	-0.0111646	-0.00244624	0.00159639
0	0	0	0	0.406109	0.948445	-0.0227141	0.0157257	-0.0207151	-0.0108727	0.0400343	-0.00747169	-0.0265393	0.0188058	-0.0159481	0.0232417	0.00802166	-0.0149545	-0.0307806	0.00780775	-0.00980711	0.0229012	-0.0228161	-0.0178207	-0.0062288	0.00157044	-0.000420322	-0.0108336	-0.00449365	-0.00173289	-0.00982119	0.00553407
0	0	0	0	0.406109	0.948445	-0.0227141	-0.00125682	-0.0207151	-0.00398253	0.0118958	-0.00747169	-0.0265393	-0.000974741	-0.0104883	0.0077123	-0.00300019	-0.00985418	-0.0148848	0.00141704	-0.00341263	0.0102218	0.00629363	-0.0228275	-0.0114581	-0.00930496	-0.0101603	-0.00497649	0.00447165	-0.011873	-0.00105233	0.000780302
0	0	0	0	0.406109	0.948445	-0.0227141	0.0181755	-0.0207151	-0.0118328	0.0464697	-0.00747169	-0.0265393	0.0261612	-0.0180482	0.0290754	0.0107533	-0.0209161	-0.0350718	0.00963404	-0.0114985	0.0276928	-0.0415133	-0.0119158	2.20878e-05	0.00752649	0.00616683	-0.0139827	-0.0103891	0.0053368	-0.015993	0.00766192
0	0	0	0	0.406109	0.948445	-0.0227141	0.0326414	-0.0207151	-0.0118328	0.0502725	-0.00747169	-0.0265393	0.0412075	-0.0192642	0.0392326	0.01494	-0.0265759	-0.0416611	0.0131093	-0.01466	0.0327307	-0.0415133	-0.00499477	0.0286547	0.0295608	0.024859	-0.0244665	-0.0266049	0.0241961	-0.0294762	0.0189153
0	0	0	0	0.406109	0.948445	-0.0227141	0.0202001	-0.0207151	-0.0118328	-0.00147991	-0.00747169	-0.0265393	-0.00896462	-0.000275785	0.0164529	0.0112137	-0.00428594	-0.0153666	0.00982361	-0.0106608	0.0142151	-0.0415133	0.000296493	0.0101192	0.0158759	0.0165106	-0.0161616	-0.017573	0.0157838	-0.0280785	0.00663296
0	0	0	0	0.406109	0.948445	-0.0227141	-0.0125394	-0.0207151	-0.00476007	-0.0115369	-0.00747169	-0.0185103	-0.017536	-0.00385754	4.28948e-05	-0.0104014	-0.011381	-0.00313103	-0.00126473	0.00053442	0.00309987	0.0103126	-0.0236734	-0.0114581	-0.0108133	-0.0116103	-0.0042874	0.00568693	-0.0133261	-5.6842e-05	3.09726e-05
0	0	0	0	0.406109	0.948445	-0.0227141	0.0115571	-0.0207151	-0.0101707	0.0466606	-0.00747169	-0.0265393	0.0202847	-0.0179465	0.0240315	0.00827464	-0.0174441	-0.0322077	0.00781992	-0.00974121	0.0250207	-0.00847428	-0.0198981	-0.0114581	-0.00386226	-0.00517535	-0.00759806	1.06995e-05	-0.00661616	-0.00589833	0.00289634
0	0	0	0	0.406109	0.948445	-0.0227141	-0.00879835	-0.0207151	-0.00331438	-0.00271762	-0.00747169	-0.0212491	-0.0127276	-0.00619535	0.00183146	-0.00782213	-0.00987466	-0.00691186	-0.000847575	-0.000601073	0.00391652	0.00816657	-0.0228173	-0.0114581	-0.0104447	-0.0109442	-0.00485319	0.0050207	-0.0125705	-0.000454209	0.000209675
0	0	0	0	0.406109	0.948445	-0.0227141	0.053528	-0.0207151	-0.0118328	-0.0184487	-0.00747169	-0.0265393	0.0171216	0.00778833	0.0256781	0.0286778	0.000924107	-0.0181844	0.0195431	-0.0122559	0.0157934	-0.0415133	0.0436474	0.0255797	0.0382494	0.0520312	-0.0297005	-0.0460492	0.0540288	-0.0725363	0.00388689
0	0	0	0	0.406109	0.948445	-0.0227141	0.0281766	-0.0207151	-0.0118328	0.0398532	-0.00747169	-0.0265393	0.0270249	-0.0147293	0.0335483	0.0134149	-0.0221661	-0.0354827	0.0114683	-0.0129987	0.0267406	-0.0415133	-0.00116477	0.0223532	0.0258551	0.0238751	-0.0213549	-0.0247956	0.0233962	-0.0295254	0.0163129
0	1	0	0	0.406109	0.948445	-0.0208276	-0.014126	-0.0207151	-0.00119638	-0.0207441	-0.00747169	-0.00860902	-0.017536	0.00129259	-0.00380324	-0.0104261	-0.00621668	0.00313182	-0.00264025	0.00199205	-0.00355963	0.0093333	-0.0218368	-0.0114581	-0.0118626	-0.0114273	-0.00384531	0.00575537	-0.0129977	-0.000848819	-0.00103314
0	0	0	0	0.406109	0.948445	-0.0227141	0.00296415	-0.0207151	-0.00511108	0.0248097	-0.00747169	-0.0265393	0.00831317	-0.0139235	0.0120827	0.000382737	-0.0110714	-0.021027	0.00318057	-0.00498102	0.0144022	0.00431757	-0.0230168	-0.0114581	-0.0084881	-0.00965188	-0.00580448	0.00376133	-0.0113514	-0.00163679	0.00121086
0	0	0	0	0.406109	0.948445	-0.0227141	0.0207333	-0.0207151	-0.0118328	0.0539905	-0.00747169	-0.0265393	0.0317932	-0.0200713	0.0312856	0.0114192	-0.0223705	-0.0385141	0.010296	-0.0122788	0.0294887	-0.0415133	-0.0130362	0.00634183	0.0111962	0.00796743	-0.013605	-0.0112196	0.00690654	-0.0161222	0.0102617
0	0	1	0	0.406109	0.948445	-0.0227141	-0.000495691	-0.0207151	-0.00510995	-0.0159819	-0.00747169	-0.0205381	-0.017536	0.00134902	0.00170848	0.00630966	0.00662503	-0.003266	0.00332418	-0.00542147	0.00655855	0.00383896	-0.0178526	-0.0114581	-0.00845642	-0.00835522	-0.00249035	0.00441317	-0.00988898	-0.00429013	-0.00147321
0	0	0	0	0.406109	0.948445	-0.0227141	0.0832776	-0.0207151	-0.0118328	-0.00863135	-0.00747169	-0.0265393	0.0526824	0.000462549	0.0497106	0.0342349	-0.0171668	-0.0325465	0.0232345	-0.0163242	0.025954	-0.0415133	0.0493185	0.0982638	0.0931103	0.0957577	-0.0587623	-0.0849909	0.0964766	-0.0870022	0.0434465
0	0	0	0	0.406109	0.948445	-0.0227141	0.0382815	-0.0207151	-0.0118328	0.0175969	-0.00747169	-0.0265393	0.0237681	-0.00877994	0.0333839	0.0164166	-0.0182099	-0.0306056	0.0133523	-0.0140656	0.0250223	-0.0415133	0.0147687	0.0409713	0.0427355	0.0428336	-0.029319	-0.0403589	0.04297	-0.0454148	0.0225293
0	0	0	0	0.406109	0.948445	-0.0227141	0.0804973	-0.0207151	-0.0118328	-0.0157137	-0.00747169	-0.0265393	0.0474891	0.00583476	0.0423246	0.0366012	-0.00738713	-0.02765	0.0240194	-0.0130964	0.0215171	-0.0415133	0.0751366	0.0554892	0.0700303	0.0894822	-0.051212	-0.0792079	0.0934654	-0.0971539	0.0205997
0	0	0	0	0.406109	0.948445	-0.0227141	-0.00928396	-0.0207151	-0.00463914	-0.00578115	-0.00747169	-0.0217755	-0.0136576	-0.00543908	0.00213902	-0.00863215	-0.0110908	-0.00614345	-0.000548305	-0.000605315	0.00500341	0.00842615	-0.0231269	-0.0114581	-0.0105009	-0.0111025	-0.00484041	0.00511298	-0.0127921	-0.000284298	0.000244783
0	0	0	0	0.406109	0.948445	-0.0227141	-0.00980779	-0.0207151	-0.00338427	-0.0048943	-0.00747169	-0.0199292	-0.0147005	-0.00529093	0.001345	-0.00861007	-0.0102427	-0.00576249	-0.00103531	-0.00019547	0.00321579	0.00854485	-0.0228768	-0.0114581	-0.0106033	-0.0110823	-0.00475515	0.00515307	-0.0127032	-0.000379019	0.000110658
1	1	1	1	0.406109	0.948445	0.0375119	-0.019981	0.0504148	0.001475	-0.0207441	-0.00175026	0.0257832	-0.017536	0.0186256	-0.0248068	-0.0107421	0.0146039	0.031329	-0.00656088	0.00692063	-0.0196979	0.0185517	-0.0167528	-0.0114581	-0.0133465	-0.0117906	0.0024281	0.00905421	-0.0135247	-0.00208636	-0.00534905
1	1	1	1	0.406109	0.948445	0.000471045	-0.019981	0.00471334	-0.000596516	-0.0207441	-0.0065632	0.00300518	-0.017536	0.00688891	-0.0116743	-0.00941332	0.000821628	0.0127207	-0.00412091	0.00452508	-0.00912333	0.0127133	-0.0209466	-0.0114581	-0.0119334	-0.0114441	-0.00207815	0.00672436	-0.013255	-0.00084906	-0.00184831
1	1	1	1	0.406109	0.948445	0.0375177	-0.019981	0.0093586	0.0297786	-0.0207441	0.0803126	0.0620049	-0.017536	-0.00341002	-0.0380093	-0.0158784	0.0203938	0.0409556	-0.0206988	0.0140985	-0.0329937	0.0691347	0.0795592	-0.0114581	-0.0162634	-0.0331821	0.0822615	0.0532917	-0.022869	-0.0400681	-0.0952692
1	1	1	1	0.406109	0.948445	0.0492893	-0.019981	0.0628643	0.00454516	-0.0207441	0.00233663	0.0360013	-0.017536	0.0223307	-0.0310734	-0.0116277	0.0207428	0.0382893	-0.00798131	0.00872091	-0.0255406	0.021802	-0.00809811	-0.0114581	-0.0162634	-0.0122235	0.00900835	0.0121118	-0.0135629	-0.00412177	-0.0114517
1	1	1	1	0.406109	0.948445	0.0093842	-0.019981	-0.0121699	0.0161456	-0.0207441	0.00999449	0.0285358	-0.017536	0.00768414	-0.0276476	0.00454183	0.0264606	0.0187742	-0.00358708	0.00564431	-0.0157335	0.0345999	0.0286962	-0.0114581	-0.0162634	-0.0188783	0.0366114	0.0265359	-0.014962	-0.0221452	-0.0453258
1	1	1	1	0.406109	0.948445	-0.00223409	-0.019981	-0.0207151	0.000365154	-0.0207441	-0.00449975	0.0193112	-0.017536	0.010165	-0.0233804	0.00672079	0.0273484	0.014989	0.00312295	-0.00702075	-0.00413692	-0.0204669	0.0887064	-0.0114581	-0.0162634	0.00153032	0.0530101	0.0211724	0.00547875	-0.0474734	-0.0650768
1	1	1	1	0.406109	0.948445	0.0399514	-0.019981	0.0487537	0.00323371	-0.0207441	-0.00257091	0.0290603	-0.017536	0.0205531	-0.0257105	-0.0115432	0.0167548	0.0332019	-0.00715928	0.00724635	-0.0221626	0.0178239	-0.0168534	-0.0114581	-0.0143885	-0.0126514	0.00250379	0.0093609	-0.0140665	-0.00226468	-0.00607321
1	1	1	1	0.406109	0.948445	0.0295373	-0.019981	0.026148	0.0145827	-0.0207441	0.0201946	0.0370562	-0.017536	0.0127605	-0.0307933	-0.00708999	0.0206477	0.031938	-0.00883748	0.00995069	-0.0222056	0.0413089	0.0129358	-0.0114581	-0.0162634	-0.0202749	0.0290246	0.0250885	-0.0187435	-0.0153109	-0.036564
1	1	1	1	0.406109	0.948445	0.0233281	-0.019981	0.0270933	0.00506604	-0.0207441	-0.00127195	0.0216149	-0.017536	0.0153421	-0.0219905	-0.0097782	0.0115256	0.0262376	-0.00624621	0.00822385	-0.0190106	0.0164412	-0.00928813	-0.0114581	-0.0162634	-0.0131745	0.00674956	0.0112538	-0.0139672	-0.00424412	-0.0111301
1	1	1	1	0.406109	0.948445	0.00913695	-0.019981	0.0101775	0.000584406	-0.0207441	-0.00715227	0.00994309	-0.017536	0.0120446	-0.014005	-0.0119383	0.0028393	0.01855	-0.00478229	0.00556516	-0.0131908	0.0108252	-0.0175504	-0.0114581	-0.0128718	-0.011394	-0.000531387	0.00715275	-0.0127992	-0.00133198	-0.00344948
1	1	1	1	0.406109	0.948445	0.0442738	-0.019981	0.0533834	0.00941898	-0.0207441	0.0114272	0.0384757	-0.017536	0.0180516	-0.0328816	-0.00670468	0.0237957	0.0368743	-0.00783538	0.00958365	-0.0236744	0.0347547	0.00689125	-0.0114581	-0.0162634	-0.0152372	0.0224544	0.019703	-0.0152628	-0.0100767	-0.0255376
1	1	1	1	0.406109	0.948445	0.00495418	-0.019981	-0.0207151	0.00680571	-0.0207441	0.0103578	0.0274587	-0.017536	0.0103756	-0.0278908	0.00282734	0.0293779	0.0207293	-0.00100927	-0.00235589	-0.00920525	0.0278914	0.060406	-0.0114581	-0.0162634	-0.0163911	0.0524203	0.0319587	-0.0116685	-0.0324834	-0.063916
1	1	1	1	0.406109	0.948445	-0.0050218	-0.019981	-0.00552226	-0.0004664	-0.0207441	-0.00732806	0.00128238	-0.017536	0.00673151	-0.00967143	-0.0113192	-0.00236684	0.0113884	-0.00388889	0.00428568	-0.00829988	0.0128781	-0.0209712	-0.0114581	-0.012701	-0.0120249	-0.00176087	0.00712315	-0.0137658	-0.000962813	-0.00249188
1	1	1	1	0.406109	0.948445	0.0458606	-0.019981	0.0384363	0.0200062	-0.0207441	0.0521958	0.0550122	-0.017536	0.00864577	-0.0380081	-0.00993944	0.0251716	0.0433599	-0.0145995	0.0114743	-0.0283305	0.0708581	0.0242923	-0.0114581	-0.0162634	-0.0275247	0.0479079	0.0374119	-0.023786	-0.0218088	-0.054057
1	1	1	1	0.406109	0.948445	0.0268901	-0.019981	0.0357063	-0.00101829	-0.0207441	-0.00734281	0.0169499	-0.017536	0.0159076	-0.0204309	-0.0117525	0.0115921	0.0264598	-0.00556913	0.00491423	-0.0146289	0.0131342	-0.019795	-0.0114581	-0.011437	-0.0113513	-0.00103543	0.00703737	-0.0129904	-0.000698823	-0.00217972
1	1	1	1	0.406109	0.948445	0.0232948	-0.019981	0.0162012	0.0135501	-0.0207441	0.0161791	0.0331458	-0.017536	0.010227	-0.0313419	-0.00135007	0.025324	0.0274599	-0.00587374	0.00770663	-0.018245	0.0289039	0.040058	-0.0114581	-0.0162634	-0.0159289	0.0403995	0.0269945	-0.0129938	-0.0220362	-0.0480125
1	1	1	1	0.406109	0.948445	0.0442511	-0.019981	0.0520432	0.00973999	-0.0207441	0.0188191	0.0409526	-0.017536	0.0161763	-0.0352967	-0.00841922	0.0246108	0.0388414	-0.00846531	0.00904353	-0.0228124	0.0421166	0.018899	-0.0114581	-0.0162634	-0.0164004	0.0325717	0.0247617	-0.0155606	-0.0139721	-0.0352525
1	1	1	1	0.406109	0.948445	0.0240597	-0.019981	0.0179551	0.0150937	-0.0207441	0.00987919	0.0320718	-0.017536	0.0123517	-0.0285322	-0.00265944	0.0223633	0.0269104	-0.00706575	0.00961869	-0.0215563	0.0321908	0.0111506	-0.0114581	-0.0162634	-0.0189956	0.0254155	0.0221136	-0.0168255	-0.0138501	-0.0322938
1	1	1	1	0.406109	0.948445	0.0268901	-0.019981	0.0357063	-0.00101829	-0.0207441	-0.00734281	0.0169499	-0.017536	0.0159076	-0.0204309	-0.0117525	0.0115921	0.0264598	-0.00556913	0.00491423	-0.0146289	0.0131342	-0.019795	-0.0114581	-0.011437	-0.0113513	-0.00103543	0.00703737	-0.0129904	-0.000698823	-0.00217972
1	1	1	1	0.406109	0.948445	0.0255977	-0.019981	-0.00126734	0.0181807	-0.0207441	0.0421694	0.0452401	-0.017536	0.00447305	-0.0324832	-0.00560815	0.0260417	0.0317767	-0.0102201	0.004686	-0.0208171	0.0404588	0.0552217	-0.0114581	-0.0162634	-0.0206482	0.0553945	0.0354969	-0.015142	-0.0348711	-0.0673144
1	1	1	1	0.406109	0.948445	0.00470946	-0.019981	-0.0129863	0.00720772	-0.0207441	-0.00598715	0.0160567	-0.017536	0.0105496	-0.0206262	0.00092867	0.0204133	0.0163979	-0.00197631	0.00262533	-0.0113301	0.00813218	0.0264792	-0.0114581	-0.0162634	-0.0115603	0.0237051	0.0168783	-0.00925677	-0.0206805	-0.0346673
1	1	1	1	0.406109	0.948445	0.0433299	-0.019981	0.0559299	0.00237542	-0.0207441	-0.0010929	0.0300597	-0.017536	0.0209452	-0.0269148	-0.0113426	0.0170913	0.0346122	-0.00698367	0.00753003	-0.0220272	0.0184438	-0.0136219	-0.0114581	-0.0146399	-0.0118735	0.00432463	0.00983611	-0.0133619	-0.00281403	-0.00728923
1	1	1	1	0.406109	0.948445	0.0238881	-0.019981	0.0191415	0.00985604	-0.0207441	0.00689351	0.0291936	-0.017536	0.0134454	-0.02773	-0.00562853	0.0212297	0.0276594	-0.00592443	0.00684606	-0.018184	0.0209131	0.0258607	-0.0114581	-0.0162634	-0.0142372	0.028461	0.0208251	-0.0123346	-0.0161069	-0.0359895
1	1	1	1	0.406109	0.948445	0.0470817	-0.019981	0.0575324	0.00998309	-0.0207441	0.0143055	0.0402322	-0.017536	0.0183135	-0.0343674	-0.00789173	0.0243287	0.0388499	-0.00876895	0.0103062	-0.0254707	0.033679	0.010315	-0.0114581	-0.0162634	-0.0151084	0.0240716	0.0204187	-0.015182	-0.0113864	-0.0280856
1	1	1	1	0.406109	0.948445	-0.019356	-0.0134226	-0.0207151	-0.000396252	-0.0207441	-0.00747169	-0.00320645	-0.017536	0.00629091	-0.00900177	0.00302	0.0120977	0.00371292	0.00242664	-0.00302441	-0.000623276	-0.0139532	0.0255732	-0.0114581	-0.0162634	-0.00376243	0.0151342	0.00875829	-0.00319382	-0.0219833	-0.026583
1	1	1	1	0.406109	0.948445	0.00790508	-0.019981	0.00866431	0.000909678	-0.0207441	-0.00727595	0.00893555	-0.017536	0.0109226	-0.0142536	-0.0102469	0.00401588	0.0176596	-0.0045921	0.00545841	-0.0127979	0.0116001	-0.0172519	-0.0114581	-0.0134212	-0.0112833	-0.000367962	0.00728635	-0.0128292	-0.00176563	-0.00392801
1	1	1	1	0.406109	0.948445	0.0169848	-0.019981	0.0142098	0.00309244	-0.0207441	-0.00470228	0.0168537	-0.017536	0.0134719	-0.0197801	-0.00928117	0.0121806	0.0231734	-0.00479127	0.00493199	-0.0143184	0.0127676	0.000675346	-0.0114581	-0.0162634	-0.011022	0.0098543	0.0115784	-0.0118232	-0.00762949	-0.0158541
1	1	1	1	0.406109	0.948445	0.036865	-0.019981	0.0418514	0.0125543	-0.0207441	0.0132023	0.03696	-0.017536	0.0171607	-0.0311517	-0.00761713	0.0206201	0.034066	-0.00881233	0.0116463	-0.0258265	0.0328829	0.0053731	-0.0114581	-0.0162634	-0.0183307	0.021928	0.0206425	-0.0172952	-0.0110473	-0.0278901
1	1	1	1	0.406109	0.948445	0.0416438	-0.019981	0.0450581	0.0127579	-0.0207441	0.0197051	0.0400654	-0.017536	0.0157934	-0.0323621	-0.00737089	0.0233833	0.0371394	-0.00967143	0.0103248	-0.0248646	0.0504863	-0.00656198	-0.0114581	-0.0162634	-0.0200795	0.0207315	0.0223094	-0.0210014	-0.0100906	-0.025416
1	1	0	0	0.406109	0.948445	-0.0227141	-0.0133545	-0.0207151	-0.00426903	-0.0139177	-0.00747169	-0.0168045	-0.017536	-0.00325841	-0.000947506	-0.011022	-0.010824	-0.00194316	-0.00173558	0.000912383	0.00216905	0.0104704	-0.0236317	-0.0114581	-0.0108934	-0.0116391	-0.00418619	0.00575446	-0.0133712	-1.54479e-08	-1.74162e-08
1	1	1	1	0.406109	0.948445	0.0328376	-0.019981	0.0397791	0.00643799	-0.0207441	0.00134287	0.027694	-0.017536	0.0165663	-0.0269663	-0.00690521	0.0185836	0.0299679	-0.00624609	0.00871758	-0.0211137	0.0196576	0.00195789	-0.0114581	-0.0162634	-0.01137	0.013584	0.0135877	-0.0123219	-0.00683861	-0.0169088
1	1	0	0	0.406109	0.948445	-0.0227141	-0.013919	-0.0207151	-0.00295243	-0.0198236	-0.00747169	-0.0120344	-0.017536	-0.000610823	-0.00296291	-0.00893077	-0.00700125	0.000510703	-0.00196145	0.00133969	-0.000906958	0.0114187	-0.0235868	-0.0114581	-0.0110545	-0.0116843	-0.00395545	0.00593192	-0.0134531	-0.00033429	-0.000357493
1	1	1	1	0.406109	0.948445	-0.0128137	-0.0106976	-0.0207151	-0.00368601	-0.0207441	-0.00747169	0.00889579	-0.017536	0.0130705	-0.019704	0.00856256	0.0217152	0.0038145	0.0106404	-0.00974504	-0.000260687	-0.0415133	0.0651503	-0.0114581	-0.0162634	0.00327494	0.0235529	0.00662424	0.0091037	-0.0602421	-0.0562419
1	1	1	1	0.406109	0.948445	-0.0221288	-0.0153071	-0.0207151	-0.00339977	-0.0207441	-0.00747169	-0.0114141	-0.017536	-0.000347711	-0.00414916	-0.0108155	-0.00700303	0.00229442	-0.00235929	0.00171919	-0.00074402	0.0112395	-0.0231686	-0.0114581	-0.0112479	-0.0116337	-0.00370622	0.00601301	-0.0133954	-0.000114294	-0.000380517
1	1	1	1	0.406109	0.948445	-0.0200673	-0.0159691	-0.0207151	-0.00290753	-0.0207441	-0.00747169	-0.00910734	-0.017536	0.00150634	-0.00388785	-0.0120946	-0.00821682	0.00370743	-0.00255847	0.00223098	-0.00239962	0.010673	-0.0224004	-0.0114581	-0.0114595	-0.0116928	-0.0033844	0.00610627	-0.0132973	-0.000271462	-0.000789431
1	1	1	1	0.406109	0.948445	0.0376055	-0.019981	0.0431406	0.00494628	-0.0207441	0.0009487	0.0298672	-0.017536	0.0180249	-0.0284111	-0.00757937	0.0213814	0.0327226	-0.00617284	0.00685513	-0.0204865	0.0206251	0.00489614	-0.0114581	-0.0162634	-0.0116282	0.015711	0.0145911	-0.012362	-0.00828013	-0.0194064
1	1	1	1	0.406109	0.948445	0.034018	-0.019981	0.0382536	0.0123339	-0.0207441	0.0113875	0.0338362	-0.017536	0.0159083	-0.0292569	-0.0055483	0.0200053	0.0318483	-0.00822295	0.0114257	-0.0243311	0.0402193	-0.0101867	-0.0114581	-0.0162634	-0.0195206	0.0149135	0.0187917	-0.0195383	-0.00841855	-0.0204472
1	1	1	1	0.406109	0.948445	0.0475073	-0.019981	0.0580912	0.00770911	-0.0207441	0.00752563	0.0379464	-0.017536	0.0204382	-0.032278	-0.00936395	0.0227577	0.0382562	-0.00843429	0.0095033	-0.0257745	0.0288549	-0.0016649	-0.0114581	-0.0162634	-0.0148346	0.01551	0.0163457	-0.01538	-0.00766002	-0.0194033
1	1	1	1	0.406109	0.948445	0.00883693	-0.019981	0.014199	9.71862e-05	-0.0207441	-0.00597999	0.0083147	-0.017536	0.0101115	-0.0143464	-0.00992589	0.00354929	0.0172296	-0.00465508	0.00553853	-0.0120081	0.0122021	-0.0188629	-0.0114581	-0.0124765	-0.0112058	-0.00107968	0.00700582	-0.0129374	-0.00125091	-0.00281032
1	1	1	1	0.406109	0.948445	0.0234967	-0.019981	0.0242666	0.00360187	-0.0207441	-0.00322941	0.0205349	-0.017536	0.0148338	-0.0222119	-0.00756396	0.0148831	0.0259526	-0.00515336	0.00601741	-0.0163422	0.0186548	-0.0065966	-0.0114581	-0.0162634	-0.0121601	0.00803296	0.0115905	-0.0132764	-0.00601809	-0.0128022
1	1	1	1	0.406109	0.948445	0.039689	-0.019981	0.0447234	0.00834586	-0.0207441	0.0121515	0.0362902	-0.017536	0.0160529	-0.0327282	-0.00819805	0.0240537	0.0357379	-0.00736657	0.00747063	-0.0208515	0.0305061	0.0220568	-0.0114581	-0.0162634	-0.0138979	0.0292352	0.0217827	-0.0131837	-0.0146774	-0.0341145
1	1	1	1	0.406109	0.948445	0.0244008	-0.019981	0.0171391	0.00768919	-0.0207441	0.00382587	0.0280627	-0.017536	0.0131665	-0.0280134	-0.00365391	0.0245758	0.027339	-0.00472247	0.00421494	-0.0157906	0.0188239	0.0333466	-0.0114581	-0.0162634	-0.0119684	0.0320724	0.0213844	-0.0103921	-0.0186504	-0.0387845
1	1	1	1	0.406109	0.948445	0.0214247	-0.019981	0.0246937	0.00174097	-0.0207441	-0.0045053	0.0169718	-0.017536	0.014259	-0.0193994	-0.0109195	0.0096016	0.0248863	-0.0055223	0.00592729	-0.0154084	0.0133161	-0.0136593	-0.0114581	-0.0154565	-0.0114193	0.00201294	0.00851073	-0.0129041	-0.00353326	-0.00686985
1	0	0	0	0.406109	0.948445	-0.0227141	0.0140349	-0.0207151	-0.0118328	0.0383283	-0.00747169	-0.0265393	0.0132401	-0.0136992	0.0242061	0.0104037	-0.0157775	-0.0296001	0.00857009	-0.00986376	0.0223196	-0.0303681	-0.0140048	-0.00709036	0.0020771	0.00164317	-0.011675	-0.00631725	0.000623743	-0.0126151	0.00488634
1	1	1	1	0.406109	0.948445	0.0377408	-0.019981	0.0246207	0.0197915	-0.0207441	0.0400554	0.0493316	-0.017536	0.00864202	-0.0362005	-0.00798086	0.0264289	0.0378204	-0.0120172	0.00937604	-0.0259179	0.0431338	0.0545595	-0.0114581	-0.0162634	-0.0228126	0.0560954	0.0366339	-0.0160694	-0.0297798	-0.0660722
1	1	1	1	0.406109	0.948445	0.0357751	-0.019981	0.0459751	0.00187735	-0.0207441	-0.00245041	0.0258213	-0.017536	0.0192387	-0.0239522	-0.0116591	0.013755	0.0309852	-0.00666514	0.00688351	-0.0201253	0.0195904	-0.018902	-0.0114581	-0.0138703	-0.0128159	0.0019387	0.00935416	-0.0145157	-0.0018311	-0.00522007
1	1	1	1	0.406109	0.948445	0.0340937	-0.019981	0.0464376	0.000352383	-0.0207441	-0.00377542	0.022765	-0.017536	0.0176756	-0.0230861	-0.0112949	0.0131422	0.0292472	-0.0063323	0.00604626	-0.0183019	0.0151276	-0.0175648	-0.0114581	-0.0121262	-0.0111793	0.000778539	0.00786375	-0.0128867	-0.00141459	-0.0037056
1	1	1	1	0.406109	0.948445	0.032637	-0.019981	0.0356889	0.00969275	-0.0207441	0.00989681	0.0329081	-0.017536	0.0148452	-0.0306157	-0.00693469	0.021953	0.0317401	-0.00681998	0.00853539	-0.0207138	0.0227727	0.0259427	-0.0114581	-0.0162634	-0.0132448	0.0292267	0.020981	-0.0120678	-0.0146918	-0.034676
1	1	1	1	0.406109	0.948445	0.0492542	-0.019981	0.0608884	0.00876969	-0.0207441	0.0152985	0.0414334	-0.017536	0.0183547	-0.0350533	-0.0101788	0.0237546	0.0405135	-0.00889486	0.00940968	-0.0242957	0.0402471	0.00529682	-0.0114581	-0.0162634	-0.0155767	0.0234948	0.0206191	-0.0159069	-0.00977326	-0.0255338
1	1	1	1	0.406109	0.948445	0.0391675	-0.019981	0.0463678	0.00481466	-0.0207441	0.0058617	0.0323021	-0.017536	0.0173927	-0.0306109	-0.00989319	0.0212627	0.0346278	-0.006433	0.00667231	-0.0197358	0.0224523	0.0186606	-0.0114581	-0.0162634	-0.0114651	0.0241445	0.0181331	-0.0113469	-0.0121441	-0.0281108
1	1	1	1	0.406109	0.948445	0.0309372	-0.019981	0.0243143	0.0164301	-0.0207441	0.0220599	0.0404948	-0.017536	0.0118413	-0.0339933	-0.00626364	0.0254099	0.0327734	-0.00850048	0.009249	-0.0226285	0.0253666	0.0509241	-0.0114581	-0.0162634	-0.0155637	0.0461509	0.0291042	-0.0123965	-0.0232459	-0.0540271
1	1	1	1	0.406109	0.948445	0.0365883	-0.019981	0.0357377	0.0167495	-0.0207441	0.0252556	0.0428766	-0.017536	0.0132125	-0.0345563	-0.0074549	0.0234737	0.0355187	-0.00995493	0.0114991	-0.0253242	0.0396986	0.0281224	-0.0114581	-0.0162634	-0.0208615	0.0384866	0.0287152	-0.0173193	-0.0185329	-0.045679
1	1	1	1	0.406109	0.948445	-0.00616902	-0.019981	-0.0207151	-0.00202716	-0.0207441	-0.00654853	0.0188316	-0.017536	0.010912	-0.0217221	0.00831771	0.0270977	0.012358	0.00497049	-0.0105281	-0.00248255	-0.0364026	0.0898197	-0.0114581	-0.0162634	0.004831	0.049322	0.0166646	0.0104889	-0.0562694	-0.0649647
1	1	1	1	0.406109	0.948445	-0.00400742	-0.0198738	-0.0049499	-9.29666e-05	-0.0207441	-0.00747169	0.00291621	-0.017536	0.00750335	-0.00985959	-0.0115033	-0.00130058	0.0111869	-0.00392493	0.00403836	-0.00956598	0.0139086	-0.022189	-0.0114581	-0.0121776	-0.0123128	-0.00204632	0.00709812	-0.0138653	-0.00059671	-0.00186592
1	0	0	1	0.406109	0.948445	-0.0227141	-0.0134481	-0.0207151	-0.00409953	-0.0139645	-0.00747169	-0.0166568	-0.017536	-0.00314948	-0.00113785	-0.0111496	-0.0108029	-0.00190477	-0.0017508	0.000999751	0.00216108	0.0117053	-0.0247115	-0.0114581	-0.0108613	-0.0120416	-0.00426893	0.0059846	-0.0138853	-1.14441e-06	-1.04394e-06
1	1	0	0	0.406109	0.948445	-0.0227141	-0.0134754	-0.0207151	-0.00419915	-0.013941	-0.00747169	-0.0167613	-0.017536	-0.00323958	-0.00104263	-0.0110885	-0.0108668	-0.0019328	-0.00174246	0.000980209	0.00218146	0.0111201	-0.0241891	-0.0114581	-0.010876	-0.011849	-0.00422482	0.00587623	-0.0136353	-1.1442e-06	-1.04366e-06
1	1	1	1	0.406109	0.948445	0.0204644	-0.019981	0.0141051	0.0126662	-0.0207441	0.00675375	0.0273621	-0.017536	0.0119379	-0.0262653	-0.00110271	0.0212886	0.0247596	-0.00594031	0.00845352	-0.0189359	0.0364438	0.000731542	-0.0114581	-0.0162634	-0.0178933	0.0201989	0.0200795	-0.0177901	-0.0114131	-0.0260226
1	1	1	1	0.406109	0.948445	0.0281233	-0.019981	0.0312139	0.00630635	-0.0207441	0.00253164	0.0262551	-0.017536	0.0148731	-0.0263943	-0.00756035	0.0179066	0.028724	-0.00587783	0.00735072	-0.0184019	0.0190273	0.0124286	-0.0114581	-0.0162634	-0.0116333	0.0192684	0.0161006	-0.0119216	-0.0103084	-0.0240616
1	1	1	1	0.406109	0.948445	0.00513112	-0.019981	-0.0207151	0.0125513	-0.0207441	0.0113786	0.0286609	-0.017536	0.00821001	-0.0287055	0.00124109	0.0268258	0.0190716	-0.00233471	0.00207015	-0.0126111	0.00106876	0.0861482	-0.0114581	-0.0162634	-0.0119275	0.0573541	0.0301089	-0.00464599	-0.0383034	-0.0726798
1	1	1	1	0.406109	0.948445	0.0330974	-0.019981	0.0420343	0.000895847	-0.0207441	-0.0053875	0.0235003	-0.017536	0.0186829	-0.0224381	-0.0122174	0.0130546	0.0290554	-0.0064542	0.00571835	-0.0191751	0.0143878	-0.0182685	-0.0114581	-0.0120882	-0.0115117	0.000339802	0.00772967	-0.0130541	-0.00111268	-0.00338146
1	1	1	1	0.406109	0.948445	0.0263777	-0.019981	-0.00642567	0.0275714	-0.0207441	0.0625768	0.0545448	-0.017536	-0.000474084	-0.0360699	-0.0102959	0.0241988	0.033654	-0.0151773	0.00978088	-0.0269759	0.053095	0.0833776	-0.0114581	-0.0162634	-0.0304438	0.0790409	0.0497702	-0.0196533	-0.041545	-0.0938399
1	1	1	1	0.406109	0.948445	0.035376	-0.019981	0.0485376	0.000741713	-0.0207441	-0.00285448	0.0238057	-0.017536	0.0178445	-0.0238215	-0.0110031	0.0137421	0.0299002	-0.00645407	0.00640258	-0.0187929	0.0169796	-0.0181074	-0.0114581	-0.0123251	-0.011509	0.00111933	0.00826398	-0.0132651	-0.00148135	-0.00394078
1	1	1	1	0.406109	0.948445	0.0363966	-0.019981	0.038713	0.00602744	-0.0207441	-0.0035033	0.0291305	-0.017536	0.0184988	-0.0260677	-0.00752396	0.0211137	0.0310063	-0.006649	0.00656977	-0.0217384	0.0201846	-0.0129518	-0.0114581	-0.0157919	-0.0130499	0.00587674	0.0109429	-0.0140284	-0.00390988	-0.00922355
1	1	1	1	0.406109	0.948445	-0.00231797	-0.019981	-0.0207151	0.0013587	-0.0207441	-0.00747169	0.00639404	-0.017536	0.00981272	-0.0157772	0.00644128	0.0212835	0.0119624	0.000910586	-0.00127523	-0.00569198	0.0182882	0.00823178	-0.0114581	-0.0162634	-0.0103491	0.0176049	0.0145291	-0.0108254	-0.0115938	-0.0213109
1	1	1	1	0.406109	0.948445	0.00778805	-0.019981	-0.0102318	0.0112358	-0.0207441	-0.00265506	0.0208713	-0.017536	0.0104472	-0.0232501	0.00246713	0.0237427	0.0178817	-0.00304901	0.00459074	-0.0143493	0.0200065	0.0225689	-0.0114581	-0.0162634	-0.0146916	0.0275317	0.0203694	-0.0124985	-0.0163358	-0.0344467
1	1	1	1	0.406109	0.948445	0.0114909	-0.019981	0.0127612	0.00214379	-0.0207441	-0.0050517	0.0127119	-0.017536	0.0124996	-0.0159094	-0.0114922	0.00451708	0.0202243	-0.00513434	0.00645641	-0.0144902	0.0133451	-0.0161707	-0.0114581	-0.0147689	-0.0123578	0.00135868	0.00853368	-0.013639	-0.00222394	-0.00573727
1	1	1	1	0.406109	0.948445	0.00539643	-0.019981	0.00976177	0.000257971	-0.0207441	-0.00613339	0.00666967	-0.017536	0.00900002	-0.0132185	-0.00952166	0.00264246	0.015267	-0.00444186	0.00512305	-0.0111314	0.0140672	-0.0214041	-0.0114581	-0.0121767	-0.0118159	-0.00182632	0.00707269	-0.0136063	-0.000912766	-0.0020717
1	1	1	1	0.406109	0.948445	0.00363541	-0.019981	0.00332539	-4.03245e-05	-0.0207441	-0.00747169	0.00675294	-0.017536	0.0102779	-0.0119886	-0.0121695	0.00137019	0.0151833	-0.00445015	0.0045897	-0.0118997	0.010644	-0.0197444	-0.0114581	-0.0119329	-0.0114328	-0.00185036	0.00659135	-0.0128925	-0.000751186	-0.00205728
1	1	1	1	0.406109	0.948445	0.0394472	-0.019981	0.0222233	0.0212045	-0.0207441	0.0560828	0.0553379	-0.017536	0.0057774	-0.0384195	-0.011431	0.0261786	0.0412661	-0.0146081	0.00978304	-0.0278307	0.0400917	0.0872486	-0.0114581	-0.0162634	-0.0242926	0.074695	0.0446704	-0.014643	-0.039121	-0.0878128
1	1	1	1	0.406109	0.948445	-0.0227141	-0.00349349	-0.0207151	-0.00471236	-0.010505	-0.00747169	-0.0204118	-0.017536	0.00137366	0.00255157	0.00429907	0.0029779	-0.00460256	0.00338851	-0.00486576	0.00581995	-0.00419651	-0.00500129	-0.0114581	-0.0128162	-0.00618236	0.00167486	0.00478637	-0.0071812	-0.00957484	-0.00801102
1	1	1	1	0.406109	0.948445	-0.0124149	-0.019981	-0.0207151	0.00419477	-0.0207441	-0.00747169	0.0088111	-0.017536	0.00838363	-0.01747	0.00763437	0.0227591	0.00820797	0.0023812	-0.00260987	-0.00396402	0.00934711	0.0383643	-0.0114581	-0.0162634	-0.0100048	0.0325479	0.0198868	-0.00759245	-0.0231764	-0.0406692
1	1	1	1	0.406109	0.948445	-0.00169354	-0.0198354	-0.0207151	-0.000142456	-0.0207441	-0.00747169	0.00758123	-0.017536	0.0100279	-0.0161112	0.00516171	0.0213736	0.0121591	0.00154064	-0.00323556	-0.0043448	0.00477713	0.0197041	-0.0114581	-0.0162634	-0.00611866	0.0201358	0.0125774	-0.00554522	-0.0186131	-0.0249265
1	1	1	1	0.406109	0.948445	0.0490477	-0.019981	0.0609782	0.00881329	-0.0207441	0.0111326	0.0402447	-0.017536	0.0194448	-0.0345831	-0.0091036	0.0244646	0.0394435	-0.00849734	0.00982722	-0.0254426	0.0327301	0.00865545	-0.0114581	-0.0162634	-0.0139837	0.0229744	0.0192323	-0.0142459	-0.00932597	-0.0249095
1	1	1	1	0.406109	0.948445	0.00285426	-0.019981	8.02174e-06	0.00126532	-0.0207441	-0.00747169	0.00691342	-0.017536	0.0098504	-0.0127042	-0.0109707	0.00242947	0.0157141	-0.00441977	0.00502694	-0.0118312	0.0120211	-0.018368	-0.0114581	-0.0136407	-0.0119367	-0.000639386	0.00743809	-0.0133105	-0.00168831	-0.00387454
1	1	1	1	0.406109	0.948445	0.0390416	-0.019981	0.0501168	0.00183561	-0.0207441	-0.00285003	0.0276484	-0.017536	0.0202203	-0.0253009	-0.0114845	0.015354	0.0324693	-0.00673984	0.00698933	-0.0211556	0.0177661	-0.0161884	-0.0114581	-0.0137084	-0.0120758	0.00274453	0.0091868	-0.0135577	-0.0020621	-0.00575974
1	1	1	1	0.406109	0.948445	0.0272038	-0.019981	0.0312755	0.00518578	-0.0207441	-0.0027333	0.0237233	-0.017536	0.0166298	-0.0231906	-0.00870392	0.0148443	0.0270814	-0.00618415	0.00793923	-0.02039	0.02016	-0.0140983	-0.0114581	-0.0162634	-0.0129133	0.00467195	0.01055	-0.0142291	-0.00342342	-0.00848954
1	1	1	1	0.406109	0.948445	0.0494859	-0.019981	0.0590148	0.0119808	-0.0207441	0.0160733	0.0439148	-0.017536	0.0190883	-0.0347874	-0.00771921	0.0249615	0.0400181	-0.00959446	0.0110542	-0.0270604	0.0448289	-0.00459112	-0.0114581	-0.0162634	-0.018159	0.019941	0.0205385	-0.0186588	-0.00800834	-0.022393
1	1	1	1	0.406109	0.948445	0.00265529	-0.019981	0.00345322	-0.0011809	-0.0207441	-0.00747169	0.00374337	-0.017536	0.00917745	-0.0115913	-0.0117547	0.000630915	0.0156665	-0.00404146	0.00457127	-0.00885481	0.00982459	-0.019046	-0.0114581	-0.0122579	-0.0111028	-0.00192233	0.00643416	-0.0126861	-0.00100249	-0.00225149
1	1	1	1	0.406109	0.948445	0.0414943	-0.019981	0.0518121	0.0040499	-0.0207441	0.00120892	0.0305507	-0.017536	0.019076	-0.0285477	-0.00952618	0.0198018	0.0342405	-0.00684482	0.00751519	-0.0215469	0.0209966	-0.00352832	-0.0114581	-0.0162634	-0.0114151	0.0105299	0.0124715	-0.012767	-0.00605028	-0.0139547
1	1	1	1	0.406109	0.948445	0.0268901	-0.019981	0.0357063	-0.00101829	-0.0207441	-0.00734281	0.0169499	-0.017536	0.0159076	-0.0204309	-0.0117525	0.0115921	0.0264598	-0.00556913	0.00491423	-0.0146289	0.0131342	-0.019795	-0.0114581	-0.011437	-0.0113513	-0.00103543	0.00703737	-0.0129904	-0.000698823	-0.00217972
1	1	1	1	0.406109	0.948445	0.0376527	-0.019981	0.0483092	0.00154656	-0.0207441	-0.00403057	0.026843	-0.017536	0.0199683	-0.0244637	-0.012252	0.0149326	0.0312534	-0.00681683	0.00637092	-0.0209485	0.0165184	-0.0177086	-0.0114581	-0.0124167	-0.011736	0.00146802	0.00840502	-0.013291	-0.00130056	-0.00415552
1	1	1	1	0.406109	0.948445	-0.0134575	-0.0172254	-0.0153495	-0.00150331	-0.0207441	-0.00747169	-0.00504707	-0.017536	0.00310893	-0.006779	-0.00864952	-0.00261256	0.00571413	-0.00265836	0.00281717	-0.00475948	0.014102	-0.0237629	-0.0114581	-0.0118306	-0.0121063	-0.00321825	0.00661521	-0.0139214	-0.000608074	-0.00102607
1	1	1	1	0.406109	0.948445	0.0404259	-0.019981	0.0396471	0.012986	-0.0207441	0.0283093	0.0436568	-0.017536	0.0140484	-0.0345372	-0.00859123	0.0242678	0.038495	-0.0100016	0.00904684	-0.023608	0.0540843	0.0149661	-0.0114581	-0.0162634	-0.0219225	0.0349085	0.0288542	-0.0200534	-0.0169579	-0.0408186
1	1	1	1	0.406109	0.948445	0.0238859	-0.019981	0.0192235	0.0115872	-0.0207441	0.0143208	0.0316962	-0.017536	0.0119044	-0.0302737	-0.0046375	0.0226101	0.0284179	-0.00607031	0.00774388	-0.0182403	0.0224423	0.0406666	-0.0114581	-0.0162634	-0.0145477	0.0371536	0.0250161	-0.0124233	-0.0217251	-0.0469765
1	1	1	1	0.406109	0.948445	0.0525475	-0.019981	0.0659993	0.0129624	-0.0207441	0.0243175	0.0453406	-0.017536	0.0187417	-0.034401	-0.00918813	0.0218112	0.0425202	-0.0118266	0.0134014	-0.0291876	0.0579072	-0.0286598	-0.0114581	-0.0162634	-0.0223041	0.0107351	0.0196486	-0.0244133	-0.00494561	-0.0140971
1	1	1	1	0.406109	0.948445	0.351732	-0.019981	0.179193	0.801991	0.368195	0.697887	0.275766	-0.017536	-0.744048	0.214319	-0.69035	-0.685347	-0.13929	-0.804169	0.81423	-0.611536	0.245963	0.00862101	-0.0114581	-0.0162634	-0.0887123	0.114118	0.100643	-0.0745155	-0.0517702	-0.130655
1	1	1	1	0.406109	0.948445	0.00444964	-0.019981	-0.0207151	0.00764983	-0.0207441	0.0268943	0.0367959	-0.017536	0.00490622	-0.0285108	0.00333428	0.0300057	0.0212302	-0.00214311	-0.00706078	-0.00945293	0.0103307	0.0916869	-0.0114581	-0.0162634	-0.00955418	0.0694037	0.0339148	-0.00219533	-0.0520401	-0.080639
1	1	1	1	0.406109	0.948445	-0.000180765	-0.019981	-0.0135004	0.00443555	-0.0207441	-0.00747169	0.0080509	-0.017536	0.0093219	-0.0151494	-0.00159142	0.012344	0.0137935	-0.00223417	0.00381123	-0.010038	0.0118639	0.000219707	-0.0114581	-0.0162634	-0.0118408	0.00936976	0.0117209	-0.0125065	-0.0094764	-0.0173458
1	1	1	1	0.406109	0.948445	0.0374618	-0.019981	0.046524	0.00169246	-0.0207441	-0.00411895	0.0268224	-0.017536	0.0204855	-0.0239657	-0.0127403	0.0141844	0.0318585	-0.00686119	0.00658734	-0.0209107	0.0161961	-0.0186359	-0.0114581	-0.01271	-0.0121363	0.000872799	0.00834464	-0.0136474	-0.00131737	-0.00403273
1	1	1	1	0.406109	0.948445	0.0423103	-0.019981	0.0517183	0.00375929	-0.0207441	-0.00209717	0.0306329	-0.017536	0.0206762	-0.027624	-0.0106732	0.0187742	0.0345426	-0.00721043	0.00770615	-0.0230558	0.0157185	-0.00933707	-0.0114581	-0.0162634	-0.0117706	0.00593312	0.0102666	-0.0128366	-0.00390422	-0.00965495
1	1	1	1	0.406109	0.948445	0.0271835	-0.019981	0.021339	0.00516669	-0.0207441	-0.00363927	0.0250933	-0.017536	0.0155482	-0.0248489	-0.00633916	0.0218784	0.0276931	-0.00507469	0.00357732	-0.0163501	0.0207937	0.00302871	-0.0114581	-0.0162634	-0.011724	0.01498	0.0142735	-0.0123579	-0.0089336	-0.0187141
1	0	0	0	0.406109	0.948445	-0.0227141	0.00953267	-0.0207151	-0.0098866	0.0320113	-0.00747169	-0.0265393	0.00592222	-0.01195	0.0206071	0.00955002	-0.0135672	-0.0259535	0.00728289	-0.00858084	0.0195765	-0.0204909	-0.0147321	-0.0114581	-0.00203041	-0.00161466	-0.00808468	-0.00268214	-0.00274683	-0.0108012	0.00222254
1	1	1	1	0.406109	0.948445	0.0222408	-0.019981	0.017916	0.0110792	-0.0207441	0.00164411	0.0264269	-0.017536	0.0137797	-0.0247478	-0.00372023	0.0196965	0.0250282	-0.00622395	0.00823477	-0.0202236	0.0297964	-0.0094788	-0.0114581	-0.0162634	-0.0164544	0.0118345	0.0155233	-0.0168929	-0.00714338	-0.0165019
1	1	0	1	0.406109	0.948445	-0.0227141	-0.0146056	-0.0207151	-0.00310204	-0.0187444	-0.00747169	-0.0119325	-0.017536	-0.000559922	-0.00256976	-0.0114522	-0.00919754	0.000891265	-0.00228054	0.00156097	-0.000918398	0.0110961	-0.0233165	-0.0114581	-0.0112613	-0.0117456	-0.00381313	0.00598906	-0.0134261	-0.000112321	-0.000346451
1	1	1	1	0.406109	0.948445	0.0274291	-0.019981	0.0305174	0.00375141	-0.0207441	-0.00177648	0.0233241	-0.017536	0.0161699	-0.0233074	-0.0114563	0.0136356	0.0283847	-0.00619194	0.00647375	-0.0181991	0.0136581	-0.00199675	-0.0114581	-0.0162634	-0.0112283	0.00934415	0.0114056	-0.0120899	-0.00568137	-0.013581
1	1	1	1	0.406109	0.948445	0.00865529	-0.019981	-0.00726838	0.00863502	-0.0207441	-0.00320328	0.0195274	-0.017536	0.0103312	-0.0225386	0.0012001	0.0224093	0.0184834	-0.00287635	0.00341698	-0.0125242	0.0262493	0.0122949	-0.0114581	-0.0162634	-0.0142591	0.0226088	0.0187406	-0.0134638	-0.0141625	-0.0285616
1	1	1	1	0.406109	0.948445	-0.0227141	-0.0146847	-0.0207151	-0.00220458	-0.0193861	-0.00747169	-0.00961974	-0.017536	0.000332826	-0.00323471	-0.0112489	-0.00835472	0.00147506	-0.00271984	0.00170453	-0.00274102	0.0112276	-0.0231818	-0.0114581	-0.0112667	-0.0117441	-0.00368578	0.00604226	-0.0134105	-0.000133342	-0.000418837
1	1	1	1	0.406109	0.948445	0.046724	-0.019981	0.0588118	0.00413357	-0.0207441	0.0001454	0.034179	-0.017536	0.0221775	-0.0295729	-0.0116773	0.019713	0.0367924	-0.00783127	0.00829302	-0.0250266	0.0209399	-0.011669	-0.0114581	-0.0161773	-0.0129296	0.00670753	0.0113119	-0.013906	-0.00352266	-0.00966325
1	1	1	1	0.406109	0.948445	0.0155581	-0.019981	0.0183358	0.00266877	-0.0207441	-0.00623604	0.0136536	-0.017536	0.0123843	-0.017478	-0.00831788	0.00927802	0.0206746	-0.00517942	0.00638101	-0.0153932	0.0146955	-0.0191586	-0.0114581	-0.0136371	-0.0118302	-0.000486585	0.00770741	-0.0135744	-0.00190589	-0.00385723
1	1	1	1	0.406109	0.948445	0.0349978	-0.019981	0.042652	0.00196291	-0.0207441	-0.00418792	0.0252774	-0.017536	0.0193842	-0.0233606	-0.0119303	0.0139655	0.0307568	-0.0065769	0.00648774	-0.0200359	0.0158701	-0.016809	-0.0114581	-0.0139368	-0.0122466	0.00172687	0.00874009	-0.0135893	-0.00212871	-0.00538636
1	1	1	1	0.406109	0.948445	0.0460806	-0.019981	0.0551653	0.00857664	-0.0207441	0.00689076	0.0378794	-0.017536	0.0201835	-0.0318169	-0.008777	0.0226393	0.0374827	-0.00851071	0.00966015	-0.0258283	0.0302536	-0.00724346	-0.0114581	-0.0162634	-0.0160317	0.0131091	0.0158392	-0.0163875	-0.00632428	-0.0167254
1	1	1	1	0.406109	0.948445	0.0278385	-0.019981	0.0314135	0.00499013	-0.0207441	-0.000641043	0.0238759	-0.017536	0.015277	-0.0242284	-0.00851104	0.0160378	0.0280676	-0.00598573	0.00700365	-0.0182044	0.0175779	-0.00105811	-0.0114581	-0.0162634	-0.011493	0.0105711	0.012434	-0.0126463	-0.00718875	-0.0155437
1	1	1	1	0.406109	0.948445	0.0444227	-0.019981	0.0556522	0.00425721	-0.0207441	0.00393202	0.0330143	-0.017536	0.0194003	-0.0296969	-0.0110797	0.0195334	0.0365287	-0.00755734	0.00764142	-0.0219435	0.0278914	-0.00879464	-0.0114581	-0.0162634	-0.0134097	0.0102814	0.0136151	-0.0147864	-0.00548231	-0.01336
1	1	1	1	0.406109	0.948445	0.0250258	-0.019981	0.0315969	0.00284106	-0.0207441	-0.00380066	0.0194281	-0.017536	0.0153158	-0.0210922	-0.00948952	0.0118494	0.0256204	-0.00585653	0.00727024	-0.0182158	0.0139373	-0.0136136	-0.0114581	-0.0146452	-0.0113756	0.002716	0.00874318	-0.0128927	-0.00273905	-0.00651975
1	1	1	1	0.406109	0.948445	0.0444803	-0.019981	0.0593157	0.00204293	-0.0207441	-0.000532358	0.030548	-0.017536	0.0210541	-0.0274018	-0.0117198	0.0167835	0.0349509	-0.00712055	0.00774679	-0.0223617	0.0184512	-0.0139741	-0.0114581	-0.0138243	-0.0115704	0.00415478	0.00962676	-0.0131807	-0.00242127	-0.0066637
1	1	1	1	0.406109	0.948445	0.0141765	-0.019981	-0.0207151	0.0131163	-0.0207441	0.0636299	0.0526468	-0.017536	0.000586147	-0.0313165	-0.00423248	0.0303748	0.031602	-0.0110889	-0.00429381	-0.0172237	0.0694593	0.0841203	-0.0114581	-0.0162634	-0.0331724	0.0873108	0.0548373	-0.0212738	-0.0470844	-0.100171
1	1	1	1	0.406109	0.948445	-0.00935947	-0.0138536	-0.0207151	-0.00038932	-0.0207441	-0.00747169	0.000289757	-0.017536	0.00888842	-0.0109425	0.00663911	0.0179283	0.0079865	0.0016665	-0.00285751	-0.00315855	0.0135872	-0.00470949	-0.0114581	-0.016154	-0.00999613	0.00849484	0.0102643	-0.0108173	-0.00985863	-0.0131857
1	1	1	1	0.406109	0.948445	0.0222257	-0.019981	-0.0207151	0.0182041	-0.0207441	0.0757917	0.0564647	-0.017536	-0.00375174	-0.0325946	-0.0115545	0.0256851	0.0348675	-0.0153756	0.000333284	-0.0223673	0.0607912	0.0887452	-0.0114581	-0.0162634	-0.0296819	0.0851042	0.052492	-0.019647	-0.0469233	-0.0994581
1	1	1	1	0.406109	0.948445	0.0253544	-0.019981	0.0261925	0.00497922	-0.0207441	-0.000259532	0.0238502	-0.017536	0.0154497	-0.0242416	-0.00956596	0.0154683	0.0276739	-0.00578961	0.00651603	-0.0177934	0.0166935	0.0075152	-0.0114581	-0.0162634	-0.0117571	0.0154952	0.0143504	-0.0119047	-0.00944163	-0.0210043
1	1	1	1	0.406109	0.948445	0.0417424	-0.019981	0.0515554	0.00420381	-0.0207441	2.27277e-05	0.0309582	-0.017536	0.0199035	-0.0279808	-0.00994533	0.0194826	0.0341757	-0.00717972	0.00762663	-0.0225498	0.0221016	-0.0122309	-0.0114581	-0.0162634	-0.0127742	0.00655323	0.0114032	-0.0142845	-0.00382356	-0.00978637
1	1	1	1	0.406109	0.948445	0.0402003	-0.019981	0.0416278	0.0108199	-0.0207441	0.0148656	0.0394588	-0.017536	0.0167135	-0.0330428	-0.00844419	0.0243131	0.0367249	-0.00854953	0.00823408	-0.0232073	0.0246059	0.0282003	-0.0114581	-0.0162634	-0.0163102	0.0314144	0.0230998	-0.013477	-0.0180471	-0.0400102
1	1	1	1	0.406109	0.948445	-0.0205886	-0.0154639	-0.0207151	-0.00259783	-0.0207441	-0.00747169	-0.0096138	-0.017536	0.00032906	-0.00432231	-0.0099478	-0.00656323	0.0023719	-0.00256518	0.00195571	-0.0023529	0.0115131	-0.0231978	-0.0114581	-0.0112259	-0.0116678	-0.00365484	0.00605522	-0.0134039	-0.000206399	-0.000439017
1	1	1	1	0.406109	0.948445	-0.00818363	-0.019981	-0.0207151	0.0114037	-0.0207441	0.00320922	0.0232888	-0.017536	0.00697097	-0.0245457	0.00801106	0.0282948	0.0115824	0.000678923	-0.00235891	-0.00727326	0.0212268	0.0526449	-0.0114581	-0.0162634	-0.0160449	0.047856	0.0289651	-0.0104874	-0.0320998	-0.0581368
1	1	1	1	0.406109	0.948445	-0.0151127	-0.0141022	-0.0207151	0.00132098	-0.0207441	-0.00747169	0.00172831	-0.017536	0.00712207	-0.0118142	0.00550047	0.0169641	0.00489633	0.00277149	-0.00346324	-0.00190605	-0.0102292	0.0229238	-0.0114581	-0.0162634	-0.00331532	0.0165549	0.00903117	-0.00258452	-0.0224417	-0.0249762
1	0	0	1	0.406109	0.948445	-0.0227141	0.00345014	-0.0207151	-0.00522678	0.0262145	-0.00747169	-0.0265393	-0.00126235	-0.0103947	0.015356	0.00625107	-0.0100099	-0.021568	0.00501214	-0.00649031	0.0155177	0.00527171	-0.0214879	-0.0114581	-0.00939817	-0.00975116	-0.00403731	0.0045545	-0.0113807	-0.00298442	-0.000348257
1	1	1	1	0.406109	0.948445	0.00148688	-0.019981	0.00133175	4.92639e-05	-0.0207441	-0.00747169	0.00578414	-0.017536	0.0094587	-0.0114296	-0.0118945	0.000347528	0.0141901	-0.00428788	0.00456814	-0.0111777	0.0118238	-0.0201207	-0.0114581	-0.0123119	-0.0117139	-0.00168368	0.00687115	-0.0132082	-0.00088457	-0.00232475
1	1	1	1	0.406109	0.948445	0.0369729	-0.019981	0.047063	0.0015357	-0.0207441	-0.00400222	0.0260674	-0.017536	0.0196045	-0.0244061	-0.0122972	0.0145502	0.0313769	-0.0068606	0.00653461	-0.0208201	0.0157858	-0.0174511	-0.0114581	-0.0125968	-0.0116615	0.00130691	0.00828409	-0.0131974	-0.00143358	-0.00423889
1	1	0	1	0.406109	0.948445	-0.0227141	-0.0143454	-0.0207151	-0.00329619	-0.0171602	-0.00747169	-0.012966	-0.017536	-0.00097815	-0.00215709	-0.0100869	-0.00882427	-9.53396e-05	-0.00196605	0.00147272	-0.000575796	0.0112714	-0.0233856	-0.0114581	-0.0112193	-0.0117191	-0.00386341	0.00597276	-0.0134128	-0.000227092	-0.000348874
1	1	1	1	0.406109	0.948445	-0.0156868	-0.00741233	-0.0207151	-0.00270103	-0.0207441	-0.00747169	-0.00794734	-0.017536	0.00694375	-0.00460207	0.00466611	0.0113406	0.00441529	0.00167243	-0.00325664	-0.000350199	0.00827725	-0.0128036	-0.0114581	-0.0112641	-0.00915607	0.00207803	0.00694399	-0.0105471	-0.00470615	-0.00525039
1	1	1	1	0.406109	0.948445	0.044772	-0.019981	0.0306798	0.0203393	-0.0207441	0.0650594	0.0579489	-0.017536	0.0055689	-0.0383874	-0.0147011	0.0233826	0.0455049	-0.0170751	0.0111917	-0.0299453	0.0623549	0.0704962	-0.0114581	-0.0162634	-0.0287471	0.0732975	0.0475384	-0.0205366	-0.0348283	-0.0840192
1	1	1	1	0.406109	0.948445	0.0334326	-0.019981	0.0363022	0.00654505	-0.0207441	0.00149871	0.028797	-0.017536	0.0161665	-0.0277113	-0.00380131	0.0224004	0.0301804	-0.00574804	0.00696783	-0.0196196	0.032402	-0.00632833	-0.0114581	-0.0162634	-0.0142204	0.01349	0.0154537	-0.0152878	-0.00725778	-0.016583
1	1	1	1	0.406109	0.948445	0.0447205	-0.019981	0.0558762	0.00273175	-0.0207441	-0.00269417	0.0314502	-0.017536	0.0216741	-0.0279554	-0.0122729	0.0189425	0.035251	-0.00745059	0.00718222	-0.023677	0.0157098	-0.0127875	-0.0114581	-0.0140367	-0.0113222	0.003977	0.00923409	-0.0127078	-0.00248567	-0.0068062
1	1	1	1	0.406109	0.948445	0.00944585	-0.019981	-0.00894561	0.00341505	-0.0207441	-0.00747169	0.0171432	-0.017536	0.0117582	-0.0214766	0.000916391	0.0231901	0.0191597	-0.00123874	-0.00036129	-0.00927347	0.0174007	0.0214902	-0.0114581	-0.0162634	-0.010415	0.0251865	0.017542	-0.00989919	-0.0164765	-0.0302475
1	1	1	1	0.406109	0.948445	-0.00220265	-0.019981	-0.00128122	-0.00135076	-0.0207441	-0.00747169	0.00069424	-0.017536	0.00691258	-0.0100705	-0.00859541	-0.000167793	0.0119434	-0.00328257	0.00400895	-0.00743817	0.0115332	-0.0199863	-0.0114581	-0.012416	-0.0112484	-0.00214902	0.00654	-0.0130213	-0.00155245	-0.00244546
1	1	1	1	0.406109	0.948445	-0.0165954	-0.0154861	-0.0207151	0.00324918	-0.0207441	-0.00747169	-0.00182082	-0.017536	0.00574841	-0.00909667	0.00361342	0.012098	0.0051266	0.000248519	0.000237209	-0.00406455	0.0124973	-0.00474284	-0.0114581	-0.0162634	-0.0115795	0.00850807	0.0110263	-0.0123265	-0.00747474	-0.0133027
1	1	1	1	0.406109	0.948445	0.0186175	-0.019981	0.0207308	0.00471935	-0.0207441	-0.00227734	0.0191291	-0.017536	0.0145735	-0.0197297	-0.0101503	0.00922771	0.023711	-0.00589192	0.00767302	-0.0177846	0.0210276	-0.0180435	-0.0114581	-0.0162634	-0.0143487	0.0032429	0.0106399	-0.0156395	-0.00289813	-0.00763677
1	1	1	1	0.406109	0.948445	0.0447737	-0.019981	0.0557928	0.00430193	-0.0207441	0.000303666	0.0331032	-0.017536	0.0216969	-0.0282632	-0.0117968	0.0186183	0.0358807	-0.00779351	0.00812644	-0.0241367	0.0221033	-0.0153632	-0.0114581	-0.0153743	-0.0130725	0.00502839	0.0108824	-0.0146866	-0.00268968	-0.00790721
1	1	1	1	0.406109	0.948445	0.0489157	-0.019981	0.0383832	0.0214421	-0.0207441	0.0652823	0.060621	-0.017536	0.00574783	-0.0412389	-0.0151901	0.0251245	0.0475858	-0.0170487	0.0121092	-0.0307674	0.0554175	0.0843299	-0.0114581	-0.0162634	-0.0243829	0.0786422	0.047636	-0.0168759	-0.0357494	-0.0870629
1	1	1	1	0.406109	0.948445	0.0447893	-0.019981	0.0566143	0.00423028	-0.0207441	0.00561647	0.0340203	-0.017536	0.0191453	-0.0309469	-0.0111678	0.0202478	0.0369405	-0.00728942	0.00766939	-0.0217646	0.0252135	0.00414652	-0.0114581	-0.0162634	-0.0124584	0.0169534	0.0157165	-0.0130897	-0.00810921	-0.0199323
1	1	1	1	0.406109	0.948445	0.040184	-0.019981	0.0502976	0.00209032	-0.0207441	-0.00355543	0.0286756	-0.017536	0.0208747	-0.025546	-0.0123979	0.0161686	0.0329137	-0.00701501	0.00674445	-0.0219053	0.0167808	-0.0164023	-0.0114581	-0.0131338	-0.0117822	0.00227838	0.00880553	-0.0132987	-0.00174598	-0.00511389
1	1	1	1	0.406109	0.948445	0.0349132	-0.019981	0.0432799	0.00761338	-0.0207441	0.00433872	0.0300122	-0.017536	0.0172468	-0.0278123	-0.00670282	0.0186539	0.0313615	-0.00691759	0.00980971	-0.0223987	0.0285308	-0.00655651	-0.0114581	-0.0162634	-0.0139168	0.0119885	0.0146364	-0.0152594	-0.00613518	-0.0154413
1	1	1	1	0.406109	0.948445	0.0242057	-0.019981	0.0163152	0.00758868	-0.0207441	0.00339431	0.0279885	-0.017536	0.012577	-0.0283544	-0.00275653	0.0258496	0.0270152	-0.00432781	0.00354499	-0.014886	0.027547	0.0264252	-0.0114581	-0.0162634	-0.0115449	0.0317045	0.0213304	-0.0106827	-0.0162553	-0.0343741
1	1	1	1	0.406109	0.948445	0.0490516	-0.019981	0.0559168	0.0141197	-0.0207441	0.0197198	0.0452025	-0.017536	0.0179789	-0.0353733	-0.00658055	0.0259901	0.0401565	-0.0103646	0.0117494	-0.0283859	0.0502217	-0.00691519	-0.0114581	-0.0162634	-0.0205278	0.0207263	0.0221382	-0.0204775	-0.009477	-0.0244801
1	1	1	1	0.406109	0.948445	0.0155634	-0.019981	0.00251516	0.0107968	-0.0207441	0.00560321	0.0271211	-0.017536	0.0110692	-0.0276153	-0.00113895	0.0243901	0.0233093	-0.0039811	0.00500544	-0.0153375	0.0177326	0.0417912	-0.0114581	-0.0162634	-0.0128986	0.0365544	0.0234867	-0.010331	-0.020928	-0.0448411
1	1	1	1	0.406109	0.948445	-0.0201908	-0.0154599	-0.0207151	-0.00205303	-0.0207441	-0.00747169	-0.00775981	-0.017536	0.00191409	-0.00353775	-0.0121216	-0.0085047	0.00326026	-0.00283981	0.00217593	-0.00375138	0.0106077	-0.0223787	-0.0114581	-0.0114709	-0.0117334	-0.00337234	0.00611552	-0.013304	-0.000275583	-0.000794746
1	1	1	0	0.406109	0.948445	-0.00173745	-0.0165603	-0.00695018	0.000848067	-0.0207441	-0.00747169	0.00225214	-0.017536	0.00726143	-0.0102813	-0.00584329	0.00473773	0.0109903	-0.00291953	0.00326739	-0.00876174	0.0108712	-0.0200113	-0.0114581	-0.01136	-0.0109539	-0.0022179	0.00628153	-0.0126381	-0.00172455	-0.00214053
1	1	0	1	0.406109	0.948445	-0.0227141	-0.0143454	-0.0207151	-0.00329619	-0.0171602	-0.00747169	-0.012966	-0.017536	-0.00097815	-0.00215709	-0.0100869	-0.00882427	-9.53396e-05	-0.00196605	0.00147272	-0.000575796	0.0112714	-0.0233856	-0.0114581	-0.0112193	-0.0117191	-0.00386341	0.00597276	-0.0134128	-0.000227092	-0.000348874
1	1	1	1	0.406109	0.948445	0.00574153	-0.019981	0.00441605	0.00314724	-0.0207441	-0.00509318	0.0112971	-0.017536	0.0110363	-0.0148535	-0.0110812	0.00393171	0.0171967	-0.00492121	0.00599672	-0.0138148	0.0205123	-0.022774	-0.0114581	-0.0142372	-0.014407	0.000321668	0.00938564	-0.0158079	-0.001549	-0.00450676
1	1	1	1	0.406109	0.948445	0.0368497	-0.019981	0.0463272	0.00171306	-0.0207441	-0.00360674	0.0262866	-0.017536	0.01992	-0.0239963	-0.0120573	0.0141937	0.0314789	-0.00665593	0.00672076	-0.0204442	0.0173466	-0.0179359	-0.0114581	-0.0131726	-0.0121721	0.0016349	0.00877943	-0.0137853	-0.0016666	-0.00474244
1	1	1	1	0.406109	0.948445	0.0417733	-0.019981	0.052577	0.0020049	-0.0207441	-0.00293543	0.0294507	-0.017536	0.0214296	-0.025974	-0.0126344	0.0160978	0.0339968	-0.00703019	0.00705265	-0.0220842	0.0147302	-0.0133766	-0.0114581	-0.0139512	-0.0115477	0.00347363	0.00906111	-0.0128889	-0.00227439	-0.00646551
1	1	1	1	0.406109	0.948445	0.0464544	-0.019981	0.0570219	0.00799038	-0.0207441	0.00912243	0.038233	-0.017536	0.0191664	-0.0335376	-0.00911719	0.0237038	0.0381021	-0.00793028	0.0092014	-0.0243643	0.0217255	0.0190722	-0.0114581	-0.0162634	-0.0125154	0.0251285	0.018869	-0.0120583	-0.0115741	-0.0288334
1	1	1	1	0.406109	0.948445	0.0140467	-0.019981	0.00674996	0.00448887	-0.0207441	-0.00747169	0.0150819	-0.017536	0.0115587	-0.0188781	-0.00447333	0.0158643	0.0201535	-0.00391679	0.00397442	-0.0131547	0.00936566	8.63565e-06	-0.0114581	-0.0162634	-0.00940203	0.00910762	0.0101684	-0.0101227	-0.00828858	-0.0137197
1	1	1	1	0.406109	0.948445	0.0436142	-0.019981	0.0244019	0.0297932	-0.0207441	0.0775371	0.0626921	-0.017536	-0.00067834	-0.0386293	-0.0160358	0.0197552	0.0437226	-0.0210552	0.0162239	-0.034572	0.0777391	0.0563946	-0.0114581	-0.0162634	-0.0337733	0.0714137	0.0497847	-0.0256175	-0.0329213	-0.0816593
1	1	1	1	0.406109	0.948445	-0.0184883	-0.016521	-0.0205171	-0.00208387	-0.0207441	-0.00747169	-0.00791266	-0.017536	0.00136649	-0.00526509	-0.00934124	-0.00515608	0.00333353	-0.00248021	0.00237616	-0.00328777	0.0139644	-0.0244102	-0.0114581	-0.0114886	-0.0122677	-0.00346391	0.00655581	-0.0140724	-0.00031476	-0.000659244
1	1	1	1	0.406109	0.948445	0.0207398	-0.019981	0.0188996	0.00808199	-0.0207441	0.00469082	0.0246379	-0.017536	0.0122478	-0.0258976	-0.00398597	0.0188713	0.025282	-0.00502865	0.00714858	-0.0164436	0.0222053	0.0176865	-0.0114581	-0.0162634	-0.0137687	0.0231645	0.0189461	-0.0133219	-0.0144303	-0.0310519
1	1	1	1	0.406109	0.948445	0.0356695	-0.019981	0.0387628	0.0122175	-0.0207441	0.0151112	0.0366865	-0.017536	0.0149373	-0.0316928	-0.0076118	0.0218564	0.0340038	-0.00844053	0.0100325	-0.0230253	0.0346449	0.0146255	-0.0114581	-0.0162634	-0.0167475	0.0275083	0.0224705	-0.015907	-0.0131195	-0.0325596
1	1	1	1	0.406109	0.948445	0.0445419	-0.019981	0.0579025	0.00234199	-0.0207441	-0.00100891	0.030521	-0.017536	0.0207545	-0.0279543	-0.0114952	0.0182805	0.0351275	-0.00713009	0.00747641	-0.0224998	0.0168442	-0.0107311	-0.0114581	-0.0146785	-0.0110769	0.00539322	0.00984532	-0.0126001	-0.00319688	-0.00813175
1	1	1	1	0.406109	0.948445	0.0155345	-0.019981	0.0220431	0.000700509	-0.0207441	-0.00569983	0.0128931	-0.017536	0.0127812	-0.0166288	-0.0103302	0.00601248	0.0205314	-0.0050981	0.00620407	-0.0147086	0.012803	-0.0187611	-0.0114581	-0.0123646	-0.0114262	-0.000662218	0.00724259	-0.013004	-0.00118912	-0.00300995
1	1	1	1	0.406109	0.948445	-0.00626207	-0.019981	-0.0207151	-0.000505917	-0.0207441	-0.00747169	0.0119711	-0.017536	0.00987501	-0.019887	0.00808055	0.0247745	0.0116161	0.00363276	-0.00583888	-0.00245357	-0.00835216	0.0614134	-0.0114581	-0.0162634	-0.00170326	0.0402991	0.0183272	0.000464907	-0.036275	-0.0500302
1	1	1	1	0.406109	0.948445	0.00249292	-0.019981	0.00225879	-0.000104787	-0.0207441	-0.00747169	0.00593629	-0.017536	0.00988577	-0.0115302	-0.0120842	0.000387633	0.0149327	-0.00433646	0.00466353	-0.0110834	0.0112936	-0.0200548	-0.0114581	-0.0122555	-0.0116573	-0.00178603	0.00679721	-0.0132008	-0.000868293	-0.00226634
1	1	1	1	0.406109	0.948445	0.0355956	-0.019981	0.040844	0.00751565	-0.0207441	0.00473969	0.0315052	-0.017536	0.0173942	-0.0285028	-0.00947147	0.0193141	0.0326499	-0.0072832	0.00845189	-0.0220025	0.0242082	0.00281934	-0.0114581	-0.0162634	-0.0128797	0.0157617	0.0154822	-0.0136972	-0.00820561	-0.0198793
1	1	1	1	0.406109	0.948445	-0.0011074	-0.019981	-0.0018884	-0.000201045	-0.0207441	-0.00747169	0.00377207	-0.017536	0.00844431	-0.0104767	-0.0118469	-0.00078226	0.0131826	-0.0041608	0.00440937	-0.0098311	0.0108552	-0.0195281	-0.0114581	-0.0125119	-0.0115397	-0.00165735	0.00678585	-0.013108	-0.000937931	-0.00243927
1	1	1	1	0.406109	0.948445	0.0188047	-0.019981	0.00348199	0.0086749	-0.0207441	0.00319103	0.0271925	-0.017536	0.0121493	-0.0264837	-0.00183244	0.0253918	0.0245546	-0.00408942	0.00247415	-0.014591	0.0136694	0.0368129	-0.0114581	-0.0162634	-0.0119141	0.0329642	0.0209922	-0.00888844	-0.022522	-0.0415781
1	1	1	1	0.406109	0.948445	0.00246134	-0.019981	-0.0133649	0.00533132	-0.0207441	-0.00747169	0.0107605	-0.017536	0.00940188	-0.0161233	-0.00260708	0.014896	0.0150778	-0.00292527	0.00267114	-0.0101564	0.0154251	-0.00247149	-0.0114581	-0.0162634	-0.0125282	0.010262	0.0123239	-0.0127201	-0.00850619	-0.0158866
1	1	1	1	0.406109	0.948445	-0.00564088	-0.019981	-0.0207151	0.0070237	-0.0207441	-0.00747169	0.0138098	-0.017536	0.00832333	-0.0206539	0.00768266	0.0249771	0.0120898	0.000635531	-0.000356296	-0.00657702	0.0300021	0.0243725	-0.0114581	-0.0162634	-0.0137179	0.0317218	0.0226366	-0.0129597	-0.0177335	-0.0366518
1	1	1	1	0.406109	0.948445	0.00480764	-0.019981	-0.0207151	0.0059314	-0.0207441	0.0209984	0.0327109	-0.017536	0.00705332	-0.0273963	0.00131889	0.0281201	0.0206647	-0.0012683	-0.00626247	-0.0093996	-0.00643693	0.0980198	-0.0114581	-0.0162634	-0.0053467	0.0653162	0.0298456	0.00101084	-0.0534131	-0.0799229
1	1	1	1	0.406109	0.948445	-0.0167946	-0.0121926	-0.0207151	-0.00168729	-0.0207441	-0.00747169	0.00345182	-0.017536	0.00969747	-0.0140881	0.00729313	0.018035	0.00318794	0.0064242	-0.00659104	-0.000604668	-0.0415133	0.072871	-0.0114581	-0.0162634	0.00785987	0.0262345	0.00478039	0.0130033	-0.0490531	-0.0483729
1	1	1	1	0.406109	0.948445	0.0407238	-0.019981	0.0467314	0.00563928	-0.0207441	0.00430092	0.0334661	-0.017536	0.0185509	-0.0300983	-0.0108324	0.0210821	0.0354132	-0.00724576	0.00675167	-0.0212096	0.0190798	0.0123442	-0.0114581	-0.0162634	-0.0115706	0.0191968	0.0160445	-0.011902	-0.0104939	-0.0240913
1	1	1	1	0.406109	0.948445	0.0173826	-0.019981	0.00871649	0.00166504	-0.0207441	-0.00747169	0.0161871	-0.017536	0.013281	-0.0207216	-0.00466344	0.0190063	0.022148	-0.00294488	0.00157405	-0.011508	0.00970633	0.0124741	-0.0114581	-0.0162634	-0.00869346	0.0160491	0.0127613	-0.00899614	-0.0113404	-0.0209003
1	1	1	1	0.406109	0.948445	-0.0113607	-0.0182042	-0.0137162	-0.00155806	-0.0207441	-0.00747169	-0.00250573	-0.017536	0.00507964	-0.00656658	-0.0126262	-0.005963	0.00803461	-0.00345294	0.00329843	-0.00656422	0.0104982	-0.0210905	-0.0114581	-0.0116878	-0.0115867	-0.00264696	0.00633673	-0.0131138	-0.000470132	-0.0014017
1	1	1	1	0.406109	0.948445	0.0418718	-0.019981	0.0510498	0.00455978	-0.0207441	0.00482808	0.0326963	-0.017536	0.0184484	-0.0301335	-0.0107115	0.0202409	0.0356278	-0.00702775	0.0071073	-0.0208772	0.0226362	0.00739944	-0.0114581	-0.0162634	-0.0118295	0.017786	0.0157529	-0.0126103	-0.0088737	-0.021397
1	1	1	1	0.406109	0.948445	0.0423805	-0.019981	0.0285364	0.020341	-0.0207441	0.055308	0.0540696	-0.017536	0.00667498	-0.0367326	-0.0133376	0.022511	0.0423284	-0.0157389	0.0113125	-0.0298098	0.0490755	0.0652987	-0.0114581	-0.0162634	-0.0268216	0.064371	0.0421412	-0.0182558	-0.0347974	-0.0781931
1	1	1	1	0.406109	0.948445	0.0318966	-0.019981	0.0377026	0.00685871	-0.0207441	0.00194003	0.0275657	-0.017536	0.0161432	-0.0271802	-0.00636743	0.0195323	0.0296029	-0.00609549	0.00852424	-0.0207358	0.0187426	0.00717814	-0.0114581	-0.0162634	-0.0113376	0.0163065	0.0147426	-0.0121823	-0.00854345	-0.0203519
1	1	1	1	0.406109	0.948445	-0.0144841	-0.019981	-0.0207151	0.00165471	-0.0207441	-0.00747169	0.00476011	-0.017536	0.00777426	-0.0150517	0.00892987	0.0208162	0.00646639	0.00331276	-0.0034863	-0.00204083	0.00320598	0.0340226	-0.0114581	-0.0162634	-0.00564076	0.027628	0.0157654	-0.00515174	-0.0247895	-0.0354743
1	1	1	1	0.406109	0.948445	0.0128235	-0.019981	-0.00360657	0.0136217	-0.0207441	0.00916087	0.0271701	-0.017536	0.00990023	-0.0260993	-0.00246458	0.021849	0.0220889	-0.00529918	0.00584657	-0.0164198	0.023972	0.0278247	-0.0114581	-0.0162634	-0.0172238	0.0315124	0.0236111	-0.014434	-0.0213571	-0.0426554
1	1	0	1	0.406109	0.948445	-0.0227141	-0.0141284	-0.0207151	-0.00372884	-0.0162607	-0.00747169	-0.0150138	-0.017536	-0.00231095	-0.00183878	-0.0110352	-0.00982041	-0.000710727	-0.00188678	0.00119279	0.00127844	0.0115321	-0.0240171	-0.0114581	-0.0110808	-0.011898	-0.00402011	0.00601196	-0.01366	-5.84128e-05	-0.000180725
1	1	1	1	0.406109	0.948445	0.0445981	-0.019981	0.0560193	0.00605046	-0.0207441	0.00451248	0.0342621	-0.017536	0.0192439	-0.0309269	-0.00812444	0.0219749	0.0359022	-0.00728787	0.00879461	-0.0234819	0.0281656	-0.0037658	-0.0114581	-0.0162634	-0.013313	0.0133628	0.0147792	-0.0142842	-0.00659838	-0.0163211
1	1	1	1	0.406109	0.948445	0.0198729	-0.019981	0.0168947	0.00433476	-0.0207441	-0.00316565	0.0199758	-0.017536	0.0138277	-0.0225217	-0.00578141	0.016713	0.0242669	-0.00431527	0.005296	-0.0152055	0.0161669	0.00753863	-0.0114581	-0.0162634	-0.0111826	0.0148723	0.0139732	-0.011908	-0.0100759	-0.021056
1	1	1	1	0.406109	0.948445	0.052671	-0.019981	0.0651529	0.0102018	-0.0207441	0.013249	0.0437624	-0.017536	0.0211632	-0.0347547	-0.00946144	0.0240212	0.0412714	-0.00963763	0.0111453	-0.0282162	0.0379566	-0.00641766	-0.0114581	-0.0162634	-0.0170901	0.0165209	0.0181821	-0.0175659	-0.00682027	-0.0192468
1	1	1	1	0.406109	0.948445	0.032008	-0.019981	0.0337758	0.0123547	-0.0207441	0.00926901	0.0339574	-0.017536	0.0150503	-0.0302849	-0.00480736	0.0226124	0.0307353	-0.00737776	0.0101381	-0.0231921	0.0303911	0.0109272	-0.0114581	-0.0162634	-0.015887	0.0236469	0.0201147	-0.0150757	-0.0116263	-0.0286534
1	1	1	1	0.406109	0.948445	0.00228695	-0.019981	0.00319927	0.000115663	-0.0207441	-0.00743992	0.00552853	-0.017536	0.00929646	-0.0118021	-0.0109307	0.000569259	0.0146998	-0.00424553	0.0050609	-0.0108165	0.0126334	-0.0204014	-0.0114581	-0.0126382	-0.0119173	-0.00152104	0.0071243	-0.0135434	-0.000980273	-0.00256217
1	1	1	1	0.406109	0.948445	0.0359505	-0.019981	0.0340627	0.0201793	-0.0207441	0.0282532	0.0439981	-0.017536	0.0125171	-0.0341674	-0.00704296	0.0219015	0.0350774	-0.0113198	0.0139289	-0.0279395	0.0426852	0.022592	-0.0114581	-0.0162634	-0.0245524	0.0373153	0.0298075	-0.0200168	-0.0184415	-0.0460926
1	1	1	1	0.406109	0.948445	0.0377596	-0.019981	0.0269342	0.0174385	-0.0207441	0.0424975	0.0505444	-0.017536	0.00912418	-0.0393721	-0.00813723	0.0286988	0.0394523	-0.0107058	0.00841088	-0.0238304	0.0454722	0.0768625	-0.0114581	-0.0162634	-0.0200062	0.0693592	0.0413379	-0.013634	-0.0324455	-0.0766212
1	1	1	1	0.406109	0.948445	0.0393629	-0.019981	0.0495631	0.00152269	-0.0207441	-0.00389479	0.0274985	-0.017536	0.0206053	-0.0250256	-0.0124114	0.0153524	0.0326354	-0.00678508	0.00663849	-0.0211819	0.0139893	-0.0139369	-0.0114581	-0.013436	-0.0113608	0.0028036	0.00864228	-0.0126747	-0.00212009	-0.00585542
1	1	1	1	0.406109	0.948445	0.0312467	-0.019981	0.037549	0.00469853	-0.0207441	-0.00184296	0.0253615	-0.017536	0.0177945	-0.0242218	-0.0101067	0.0147011	0.0295583	-0.00673854	0.00828783	-0.0212933	0.015827	-0.00999148	-0.0114581	-0.0162634	-0.0122611	0.00575618	0.0104084	-0.0132471	-0.00380885	-0.00973297
1	1	1	1	0.406109	0.948445	0.0253703	-0.019981	0.00701827	0.020991	-0.0207441	0.0380315	0.0435059	-0.017536	0.00588086	-0.0339358	-0.00466198	0.025248	0.0305275	-0.009858	0.00911445	-0.0227119	0.0460556	0.0483003	-0.0114581	-0.0162634	-0.0221762	0.0528614	0.0357619	-0.0173836	-0.0298892	-0.0634073
1	1	1	1	0.406109	0.948445	0.00181725	-0.019981	-0.000446718	0.00173727	-0.0207441	-0.00725648	0.00722983	-0.017536	0.00965236	-0.0123485	-0.0109492	0.00200041	0.0147452	-0.00434006	0.00499838	-0.0116216	0.0163425	-0.0219469	-0.0114581	-0.0135584	-0.0130593	-0.00110003	0.00804116	-0.014624	-0.00137736	-0.00332411
1	1	1	1	0.406109	0.948445	0.0419211	-0.019981	0.0489651	0.00477188	-0.0207441	0.00282114	0.0329572	-0.017536	0.0194016	-0.0293073	-0.0118686	0.0198206	0.0358987	-0.00747623	0.00676366	-0.0214286	0.0208955	0.0020164	-0.0114581	-0.0162634	-0.0122755	0.0141867	0.014323	-0.0130731	-0.00755529	-0.0181703
1	1	1	1	0.406109	0.948445	0.0271117	-0.019981	0.0349665	-2.69555e-05	-0.0207441	-0.00647584	0.0186901	-0.017536	0.0163442	-0.0204517	-0.0118444	0.0113707	0.0262906	-0.00595167	0.0049994	-0.0161317	0.0140034	-0.0203115	-0.0114581	-0.0114907	-0.0115865	-0.000992273	0.00721853	-0.0132693	-0.000712911	-0.00223553
1	1	1	1	0.406109	0.948445	0.0219256	-0.019981	0.00949832	0.0158612	-0.0207441	0.0181601	0.0349458	-0.017536	0.010046	-0.0311675	-0.00195371	0.025067	0.0269914	-0.00657635	0.00779774	-0.0197443	0.0260626	0.0460706	-0.0114581	-0.0162634	-0.0180367	0.0428524	0.028319	-0.0126411	-0.0263718	-0.0544995
1	1	1	1	0.406109	0.948445	-0.000167445	-0.019981	-0.00310417	0.00108915	-0.0207441	-0.00745347	0.00500012	-0.017536	0.00877084	-0.011632	-0.0114259	0.000350487	0.0145152	-0.00423855	0.00505865	-0.0106177	0.0115254	-0.0177634	-0.0114581	-0.0144794	-0.0122781	-0.000406022	0.00769703	-0.0135814	-0.00222475	-0.0047029
1	1	1	1	0.406109	0.948445	0.0466245	-0.019981	-0.0207151	0.0713711	0.0272247	0.175015	0.0789416	-0.017536	-0.0713275	-0.0216765	-0.085926	-0.0459753	0.0234883	-0.0701179	0.0410134	-0.0650179	0.136927	0.0106435	-0.0114581	-0.0162634	-0.0531059	0.0678543	0.0598601	-0.043356	-0.0530257	-0.0914621
1	1	1	1	0.406109	0.948445	0.0486744	-0.019981	0.0608958	0.00525467	-0.0207441	0.00239732	0.03618	-0.017536	0.0222977	-0.0305941	-0.0116453	0.0207497	0.0381637	-0.00832612	0.00879644	-0.0257758	0.022988	-0.0115217	-0.0114581	-0.0162634	-0.0134184	0.00763372	0.0121321	-0.0146713	-0.00387228	-0.010787
1	1	1	1	0.406109	0.948445	0.043724	-0.019981	0.0556848	0.00306775	-0.0207441	-0.000632272	0.0315041	-0.017536	0.0217772	-0.0271324	-0.0123641	0.0166783	0.0353366	-0.00754537	0.0079707	-0.0232948	0.0194295	-0.0160694	-0.0114581	-0.0145326	-0.0129054	0.00372267	0.0100397	-0.0142776	-0.00228947	-0.00680135
1	1	1	1	0.406109	0.948445	0.0291282	-0.019981	0.0125696	0.0161289	-0.0207441	0.0330178	0.0453181	-0.017536	0.00884451	-0.0372016	-0.00337841	0.0310116	0.0337392	-0.0077328	0.00552438	-0.0195962	0.0442769	0.0692016	-0.0114581	-0.0162634	-0.0196528	0.0651794	0.0390813	-0.0133226	-0.0305727	-0.0710371
1	1	1	1	0.406109	0.948445	-0.00558787	-0.019981	-0.0207151	0.00464116	-0.0207441	-0.00747169	0.0115071	-0.017536	0.00925523	-0.0186772	0.00261329	0.0190549	0.0111639	0.000930355	-0.000537144	-0.00685602	-0.0190416	0.0537173	-0.0114581	-0.0162634	-0.00451262	0.0294539	0.0143817	-0.000708664	-0.0337206	-0.0458699
1	1	1	1	0.406109	0.948445	-0.017452	-0.0112722	-0.0207151	0.00229248	-0.0207441	-0.00747169	-0.00467642	-0.017536	0.00476215	-0.00650727	-0.0015344	0.0062217	0.0044653	-0.000798856	0.000784954	-0.00400701	0.00483333	-0.0130837	-0.0114581	-0.0149544	-0.0100788	-0.000109395	0.00636846	-0.0112719	-0.00672814	-0.00677507
1	1	1	1	0.406109	0.948445	-0.0227141	-0.00293807	-0.0207151	-0.00287263	-0.00668272	-0.00747169	-0.022133	-0.017536	-0.000179123	0.00421996	0.00552039	0.00209898	-0.00694672	0.00308269	-0.00397147	0.00569124	0.00436481	-0.0139944	-0.0114581	-0.0111974	-0.00897727	-2.36593e-05	0.00581118	-0.0103479	-0.00438368	-0.00400534
1	1	1	1	0.406109	0.948445	0.0356547	-0.019981	0.0363414	0.0153725	-0.0207441	0.0223112	0.0406665	-0.017536	0.0140635	-0.0331966	-0.00860498	0.0212727	0.0352239	-0.00988878	0.0115517	-0.0250594	0.0356395	0.0245015	-0.0114581	-0.0162634	-0.0199154	0.0344062	0.026499	-0.0169155	-0.0176229	-0.0422881
1	1	1	1	0.406109	0.948445	0.0300524	-0.019981	0.0208029	0.011458	-0.0207441	0.0198868	0.0373907	-0.017536	0.0120569	-0.0319969	-0.0044926	0.0259035	0.0322698	-0.00683148	0.00566383	-0.0193538	0.0303705	0.0426293	-0.0114581	-0.0162634	-0.0174495	0.0429299	0.0285169	-0.0136766	-0.0238636	-0.0518625
1	1	1	1	0.406109	0.948445	0.0148189	-0.019981	0.00308527	0.0094705	-0.0207441	0.00130537	0.023419	-0.017536	0.0116486	-0.0242146	-0.00188479	0.021165	0.0220368	-0.0042857	0.00514336	-0.0154906	0.020065	0.0184516	-0.0114581	-0.0162634	-0.0137444	0.0233933	0.0186415	-0.0126158	-0.0166988	-0.0322218
1	1	1	1	0.406109	0.948445	0.0257749	-0.019981	0.0226989	0.00474966	-0.0207441	-0.00216637	0.0236818	-0.017536	0.013836	-0.0250198	-0.00417641	0.0214883	0.0264995	-0.00442549	0.0040933	-0.0151688	0.0218963	0.00618765	-0.0114581	-0.0162634	-0.0116495	0.0171004	0.0152424	-0.0122758	-0.0103648	-0.0211331
1	1	1	1	0.406109	0.948445	0.0304928	-0.019981	0.0353153	0.00151329	-0.0207441	-0.00572984	0.0216759	-0.017536	0.0167264	-0.0232028	-0.00763232	0.0166272	0.0280025	-0.00515071	0.00534505	-0.017286	0.0166566	-0.0101457	-0.0114581	-0.0150716	-0.0108125	0.00516046	0.00966461	-0.0123613	-0.0041148	-0.00872413
1	1	1	1	0.406109	0.948445	0.0174081	-0.019981	0.0175157	0.00216109	-0.0207441	-0.0050175	0.015445	-0.017536	0.0128752	-0.0196481	-0.00735044	0.0123844	0.0224778	-0.00423847	0.00531748	-0.0137368	0.0154588	-0.00322007	-0.0114581	-0.0162634	-0.0107232	0.008062	0.0109597	-0.0121074	-0.00701601	-0.0136338
1	1	1	1	0.406109	0.948445	-0.0211523	-0.0154898	-0.0207151	-0.00186193	-0.0207441	-0.00747169	-0.00817786	-0.017536	0.00161278	-0.00327275	-0.0121331	-0.00898121	0.00288399	-0.00276667	0.00219902	-0.00342963	0.0111879	-0.0227472	-0.0114581	-0.0117608	-0.0119847	-0.00336684	0.006288	-0.0135855	-0.000400203	-0.000971192
1	1	1	1	0.406109	0.948445	0.00713706	-0.019981	-0.0144477	0.00524004	-0.0207441	-0.00719053	0.0169889	-0.017536	0.0112985	-0.0195081	0.0047378	0.0235789	0.0159814	0.000262072	-0.0003963	-0.0100686	0.0353331	-0.0125572	-0.0114581	-0.0162634	-0.0162506	0.0125163	0.0158434	-0.0169629	-0.0168234	-0.0209118
1	1	1	1	0.406109	0.948445	0.041377	-0.019981	0.0206614	0.022439	-0.0207441	0.0715158	0.058148	-0.017536	0.00140133	-0.0367509	-0.0124651	0.0231816	0.0428648	-0.0177291	0.0104319	-0.0290933	0.080647	0.0416999	-0.0114581	-0.0162634	-0.0323864	0.0633724	0.0462113	-0.0260243	-0.0306597	-0.0720331
1	1	1	1	0.406109	0.948445	0.0415224	-0.019981	0.0397828	0.0153796	-0.0207441	0.0323766	0.0462933	-0.017536	0.012793	-0.036196	-0.00849758	0.0253611	0.0392918	-0.010706	0.0099074	-0.0247357	0.0514225	0.0271465	-0.0114581	-0.0162634	-0.0225127	0.0421303	0.0317179	-0.0193254	-0.0194843	-0.0482582
1	1	1	1	0.406109	0.948445	0.0258437	-0.019981	0.0282645	0.00559898	-0.0207441	0.0014868	0.0246546	-0.017536	0.0148057	-0.02496	-0.00855507	0.0158415	0.0276843	-0.00575152	0.00718476	-0.0178052	0.0171914	0.00828735	-0.0114581	-0.0162634	-0.0121973	0.0167325	0.0151154	-0.0124843	-0.00903804	-0.0216205
1	1	1	1	0.406109	0.948445	0.00617776	-0.019981	0.00657225	-0.000264241	-0.0207441	-0.00747169	0.0067384	-0.017536	0.0107619	-0.0133339	-0.0117953	0.00253702	0.0177198	-0.00432762	0.0052892	-0.0111444	0.00984691	-0.0173465	-0.0114581	-0.0130432	-0.0113969	-0.00070535	0.00703008	-0.0127643	-0.00142129	-0.00352079
1	1	1	1	0.406109	0.948445	0.00547485	-0.019981	0.00983036	-0.000158088	-0.0207441	-0.00626502	0.00613469	-0.017536	0.00895586	-0.013178	-0.00945412	0.00228542	0.0156028	-0.00431915	0.00518154	-0.010699	0.0123354	-0.0190607	-0.0114581	-0.0124426	-0.0112448	-0.0011781	0.00698712	-0.0129588	-0.00126595	-0.00276397
1	1	1	1	0.406109	0.948445	0.0268901	-0.019981	0.0357063	-0.00101829	-0.0207441	-0.00734281	0.0169499	-0.017536	0.0159076	-0.0204309	-0.0117525	0.0115921	0.0264598	-0.00556913	0.00491423	-0.0146289	0.0131342	-0.019795	-0.0114581	-0.011437	-0.0113513	-0.00103543	0.00703737	-0.0129904	-0.000698823	-0.00217972
1	1	1	1	0.406109	0.948445	0.0289704	-0.019981	0.0277644	0.0107177	-0.0207441	0.00877705	0.0321363	-0.017536	0.0148908	-0.0288154	-0.00700178	0.020499	0.0304573	-0.00722005	0.00839986	-0.0207365	0.0245562	0.0174088	-0.0114581	-0.0162634	-0.0160315	0.0251841	0.0205284	-0.0143782	-0.0139334	-0.0323417
1	1	1	1	0.406109	0.948445	0.0437063	-0.019981	0.053135	0.00368917	-0.0207441	0.00160255	0.0325687	-0.017536	0.0202705	-0.0285613	-0.0119599	0.0188879	0.0359537	-0.00731844	0.00689753	-0.021624	0.0226639	-0.00787261	-0.0114581	-0.0162634	-0.0128649	0.00907921	0.0124837	-0.0138851	-0.00519265	-0.0125655
1	1	1	1	0.406109	0.948445	-0.0113463	-0.019981	-0.0207151	0.0125479	-0.0207441	-0.00236561	0.0153072	-0.017536	0.00565643	-0.0191978	0.00641231	0.0210729	0.00651725	0.00102212	-0.000107778	-0.00654784	0.0255213	-0.00154824	-0.0114581	-0.0162634	-0.0145533	0.0162178	0.0160242	-0.0137755	-0.0232783	-0.0264946
1	1	1	1	0.406109	0.948445	0.0292727	-0.019981	0.0345187	0.00341009	-0.0207441	-0.00108631	0.0242231	-0.017536	0.0168968	-0.0235754	-0.0108998	0.013567	0.0289087	-0.00601953	0.00689548	-0.0184126	0.0159014	-0.00389358	-0.0114581	-0.0162634	-0.0120567	0.00903355	0.0117053	-0.0127212	-0.00574008	-0.0134185
1	1	1	1	0.406109	0.948445	0.0431937	-0.019981	0.0560297	0.0032628	-0.0207441	0.00017496	0.0305137	-0.017536	0.019785	-0.0282443	-0.0103648	0.0188152	0.0346112	-0.00715556	0.00774101	-0.0222733	0.0194567	-0.00962517	-0.0114581	-0.0162634	-0.011634	0.0068692	0.0109272	-0.0131918	-0.00402444	-0.00989589
1	1	1	1	0.406109	0.948445	0.030785	-0.019981	0.0282163	0.00681752	-0.0207441	0.00928245	0.0319157	-0.017536	0.0151832	-0.0299646	-0.00652662	0.0233534	0.0318732	-0.00570072	0.00524694	-0.0176587	0.024709	0.0313185	-0.0114581	-0.0162634	-0.0138115	0.0328198	0.0227629	-0.0120886	-0.0177436	-0.0396056
1	1	1	1	0.406109	0.948445	0.0132922	-0.019981	0.0137079	-6.82515e-06	-0.0207441	-0.00718549	0.0110748	-0.017536	0.0124038	-0.0158761	-0.00900098	0.00712745	0.020403	-0.00390427	0.00477003	-0.011538	0.0118673	-0.0109342	-0.0114581	-0.0162634	-0.0108312	0.00264074	0.00843854	-0.0122337	-0.00453153	-0.00804852
1	1	1	1	0.406109	0.948445	0.0443177	-0.019981	0.0545175	0.00511912	-0.0207441	0.00195632	0.0333227	-0.017536	0.020445	-0.0293968	-0.0101035	0.0205412	0.0357518	-0.00757438	0.00817835	-0.0237923	0.0253144	-0.012369	-0.0114581	-0.0162634	-0.013512	0.00759611	0.0123544	-0.0149176	-0.00428856	-0.0108417
1	1	1	1	0.406109	0.948445	0.0139787	-0.019981	-0.0111505	0.0158127	-0.0207441	0.016388	0.0309619	-0.017536	0.00839834	-0.0255209	0.00204992	0.0257941	0.0217919	-0.00533608	0.00386248	-0.0160344	0.0573348	-0.0183731	-0.0114581	-0.0162634	-0.0246408	0.0185478	0.0234534	-0.0247282	-0.0152905	-0.0263151
1	1	1	1	0.406109	0.948445	0.0118942	-0.019981	0.00131267	0.00948322	-0.0207441	-0.00282077	0.019892	-0.017536	0.0110612	-0.0218643	-0.00238645	0.0183766	0.0203017	-0.00450021	0.00599736	-0.015485	0.017745	0.00856611	-0.0114581	-0.0162634	-0.0126658	0.0180597	0.0158441	-0.0129427	-0.00992377	-0.0228668
1	1	1	1	0.406109	0.948445	0.0569919	-0.019981	0.0383783	0.0358262	-0.0207441	0.107914	0.0717369	-0.017536	-0.00904746	-0.0366541	-0.0249989	0.00934394	0.0506887	-0.0318789	0.0234939	-0.0442501	0.122733	-0.00513457	-0.0114581	-0.0162634	-0.0450838	0.0524046	0.0498267	-0.0402686	-0.021949	-0.0595124
1	1	1	1	0.406109	0.948445	-0.00135776	-0.0176482	-0.0191959	0.00468077	-0.0207441	-0.00747169	0.006213	-0.017536	0.0084433	-0.0138979	0.00248273	0.0163731	0.0112566	-0.0011556	0.00215972	-0.00893629	0.0112463	-0.0045199	-0.0114581	-0.0162634	-0.0100271	0.00740517	0.00977235	-0.0108418	-0.00818829	-0.0123105
1	1	1	1	0.406109	0.948445	0.0234363	-0.019981	0.0254055	0.00516749	-0.0207441	-0.00149222	0.0215018	-0.017536	0.0150877	-0.0221337	-0.00874751	0.0135531	0.0259044	-0.00580817	0.00732769	-0.0183098	0.0168359	-0.00656192	-0.0114581	-0.0162634	-0.0123728	0.00772127	0.0115082	-0.0135004	-0.00573508	-0.0128732
1	1	1	1	0.406109	0.948445	-0.0206055	-0.0167175	-0.0207151	0.000542054	-0.0207441	-0.00747169	-0.00252839	-0.017536	0.00580752	-0.00968282	0.00660537	0.0154599	0.00346324	0.00269214	-0.00338678	-0.000243305	0.00288188	0.0208708	-0.0114581	-0.0162634	-0.00706319	0.0197713	0.0130721	-0.00694272	-0.0172594	-0.0263476
1	1	1	1	0.406109	0.948445	-0.00691377	-0.0187155	-0.00892385	-0.000688733	-0.0207441	-0.00747169	0.000625828	-0.017536	0.00657484	-0.00853802	-0.0116438	-0.0026341	0.00986462	-0.00367475	0.00359604	-0.00831918	0.0119252	-0.0213416	-0.0114581	-0.012013	-0.011933	-0.00225625	0.00673072	-0.0134483	-0.000616511	-0.00176707
1	1	1	1	0.406109	0.948445	0.0271627	-0.019981	0.0356212	-0.000182508	-0.0207441	-0.00643649	0.0184461	-0.017536	0.0161241	-0.0205759	-0.0112839	0.0115593	0.0261587	-0.00578166	0.00510434	-0.0159736	0.0148322	-0.0199257	-0.0114581	-0.0117504	-0.0115936	-0.00054306	0.00746134	-0.01329	-0.000905222	-0.00261874
1	1	1	1	0.406109	0.948445	0.0335363	-0.019981	0.0335424	0.00926842	-0.0207441	0.00383931	0.0311752	-0.017536	0.0152583	-0.0288698	-0.0028847	0.0248597	0.0304466	-0.00618571	0.0071141	-0.0202477	0.0294162	0.00313932	-0.0114581	-0.0162634	-0.0142851	0.0185225	0.0173652	-0.0145591	-0.0099734	-0.0223325
1	1	1	1	0.406109	0.948445	0.0341351	-0.019981	0.0188448	0.0223999	-0.0207441	0.0341978	0.047266	-0.017536	0.0093205	-0.0340177	-0.0027495	0.0279447	0.0338443	-0.011223	0.00997871	-0.0256542	0.0648335	0.00321799	-0.0114581	-0.0162634	-0.0281052	0.034208	0.0315136	-0.024938	-0.017286	-0.0407624
1	1	1	1	0.406109	0.948445	0.0340236	-0.019981	0.0394933	0.00985855	-0.0207441	0.00614319	0.0318401	-0.017536	0.0170407	-0.0277285	-0.0074472	0.0185697	0.0314694	-0.0079615	0.010252	-0.0237653	0.0341549	-0.0186754	-0.0114581	-0.0162634	-0.0170947	0.00759338	0.0144637	-0.0183732	-0.00422909	-0.0115843
1	1	1	1	0.406109	0.948445	0.0417119	-0.019981	0.0516395	0.00450393	-0.0207441	0.00633161	0.0328857	-0.017536	0.0182362	-0.030385	-0.0106954	0.0199086	0.0358251	-0.00700527	0.0073688	-0.0205894	0.0238911	0.0107168	-0.0114581	-0.0162634	-0.0120254	0.020257	0.0169878	-0.0126818	-0.00980741	-0.0238741
1	1	1	1	0.406109	0.948445	0.0440748	-0.019981	0.0507532	0.00875794	-0.0207441	0.0130026	0.0391814	-0.017536	0.0179742	-0.0336312	-0.0103499	0.0234975	0.0383588	-0.00843532	0.00835794	-0.0233164	0.0274926	0.0239757	-0.0114581	-0.0162634	-0.0146738	0.0299329	0.0220626	-0.0131123	-0.0148299	-0.0353765
1	1	1	1	0.406109	0.948445	9.10011e-05	-0.019981	-0.000857194	-0.000624592	-0.0207441	-0.00747169	0.00378374	-0.017536	0.00897326	-0.0105664	-0.0122868	-0.00112523	0.0142002	-0.00418954	0.00456174	-0.00983832	0.00957154	-0.0190769	-0.0114581	-0.0122206	-0.0112336	-0.00190662	0.00646046	-0.0127355	-0.000918121	-0.00224775
1	1	1	1	0.406109	0.948445	0.0398187	-0.019981	0.0483201	0.00474817	-0.0207441	0.00540555	0.031896	-0.017536	0.0171804	-0.0302112	-0.00971094	0.0207676	0.0345786	-0.00665169	0.00692949	-0.0198038	0.0274387	0.00797219	-0.0114581	-0.0162634	-0.0119161	0.0195254	0.0168258	-0.0128317	-0.00936456	-0.0223947
1	1	1	1	0.406109	0.948445	0.0268901	-0.019981	0.0357063	-0.00101829	-0.0207441	-0.00734281	0.0169499	-0.017536	0.0159076	-0.0204309	-0.0117525	0.0115921	0.0264598	-0.00556913	0.00491423	-0.0146289	0.0131342	-0.019795	-0.0114581	-0.011437	-0.0113513	-0.00103543	0.00703737	-0.0129904	-0.000698823	-0.00217972
1	1	1	1	0.406109	0.948445	0.0018272	-0.019981	0.00168104	-0.000280979	-0.0207441	-0.00747169	0.00503318	-0.017536	0.00925169	-0.0116133	-0.0120056	4.53307e-05	0.0149133	-0.00440313	0.00477583	-0.0109231	0.0100945	-0.0191933	-0.0114581	-0.012168	-0.0112346	-0.00182747	0.00651465	-0.0127408	-0.000901221	-0.0022479
1	1	1	1	0.406109	0.948445	-0.00936197	-0.0187811	-0.0116444	-0.00113889	-0.0207441	-0.00747169	-0.00105369	-0.017536	0.00587171	-0.00743513	-0.0124806	-0.00479332	0.00912228	-0.00357748	0.00356628	-0.00730164	0.0114524	-0.0213408	-0.0114581	-0.0120805	-0.0118949	-0.00243393	0.00663016	-0.0134259	-0.000615264	-0.00173355
1	1	1	1	0.406109	0.948445	0.0230849	-0.019981	0.0239347	0.00620277	-0.0207441	-0.000566729	0.0224905	-0.017536	0.0145291	-0.0239046	-0.00719895	0.016285	0.0258264	-0.00547957	0.00739217	-0.0182008	0.0125881	0.0109973	-0.0114581	-0.0162634	-0.0108558	0.0160479	0.0140867	-0.0113189	-0.0100641	-0.0221258
1	1	1	1	0.406109	0.948445	0.00016281	-0.019981	-0.0193825	0.00570469	-0.0207441	-0.00681032	0.0129988	-0.017536	0.00906401	-0.0186446	0.00135343	0.0181089	0.0136971	-0.00061733	0.00148885	-0.00891932	0.0188929	0.0137928	-0.0114581	-0.0162634	-0.013686	0.0199146	0.0170023	-0.012438	-0.0180664	-0.0306757
1	1	1	1	0.406109	0.948445	-0.0114405	-0.0169569	-0.0185028	0.000127326	-0.0207441	-0.00747169	-0.00226252	-0.017536	0.00478687	-0.00732518	-0.0106731	-0.00237985	0.00823724	-0.00345273	0.00321389	-0.00694801	0.00967932	-0.0199641	-0.0114581	-0.0127231	-0.0114938	-0.00255275	0.00633622	-0.0129525	-0.00116154	-0.0021861
1	1	1	1	0.406109	0.948445	0.0314722	-0.019981	0.0371025	0.00602334	-0.0207441	0.0031915	0.0274734	-0.017536	0.0159546	-0.0264275	-0.00858642	0.0171173	0.0302593	-0.00648638	0.00790793	-0.0194928	0.0251401	-0.0022569	-0.0114581	-0.0162634	-0.0131255	0.0130022	0.0145434	-0.0142372	-0.00713829	-0.0170722
1	1	1	1	0.406109	0.948445	0.00454241	-0.019981	0.00515983	0.00022569	-0.0207441	-0.00726609	0.00689597	-0.017536	0.0100629	-0.0127944	-0.0117153	0.00136165	0.0162798	-0.00461372	0.00516934	-0.0118595	0.0113227	-0.0193604	-0.0114581	-0.012513	-0.0114845	-0.00147708	0.00686275	-0.0130472	-0.00101486	-0.00258902
1	1	1	1	0.406109	0.948445	0.0431886	-0.019981	0.0533239	0.00392742	-0.0207441	0.00217978	0.0320136	-0.017536	0.0191921	-0.0290957	-0.0111333	0.0195071	0.0356831	-0.00732376	0.00697945	-0.0212997	0.0231721	-0.00565752	-0.0114581	-0.0162634	-0.0120225	0.0101243	0.012678	-0.0133656	-0.00574991	-0.0134586
1	1	1	1	0.406109	0.948445	0.0266953	-0.019981	0.0263338	0.00721192	-0.0207441	0.00232011	0.0263803	-0.017536	0.0152384	-0.0251678	-0.0078857	0.0176482	0.0283982	-0.00632449	0.00705104	-0.0186014	0.0253573	-0.00198592	-0.0114581	-0.0162634	-0.0136829	0.0129451	0.0149347	-0.0149367	-0.00827904	-0.0184437
1	1	1	1	0.406109	0.948445	-0.013544	-0.0168309	-0.0167896	-0.00120738	-0.0207441	-0.00747169	-0.00327362	-0.017536	0.00431558	-0.00615602	-0.0119786	-0.00535975	0.00641889	-0.00333366	0.00284647	-0.00628219	0.0117607	-0.0225577	-0.0114581	-0.0114889	-0.0119145	-0.00302129	0.006402	-0.013529	-0.000315668	-0.00101502
1	1	1	1	0.406109	0.948445	0.0268901	-0.019981	0.0357063	-0.00101829	-0.0207441	-0.00734281	0.0169499	-0.017536	0.0159076	-0.0204309	-0.0117525	0.0115921	0.0264598	-0.00556913	0.00491423	-0.0146289	0.0131342	-0.019795	-0.0114581	-0.011437	-0.0113513	-0.00103543	0.00703737	-0.0129904	-0.000698823	-0.00217972
1	1	1	1	0.406109	0.948445	0.000644617	-0.019981	-0.0207151	0.00176907	-0.0207441	-0.00747169	0.0123918	-0.017536	0.0105485	-0.0203243	0.00396554	0.0236422	0.0153015	0.000745912	-0.00195932	-0.00581951	0.0143893	0.0374793	-0.0114581	-0.0162634	-0.00928209	0.0326983	0.0201095	-0.00786267	-0.0201063	-0.0388508
1	1	1	1	0.406109	0.948445	0.028266	-0.019981	0.0349842	0.000991044	-0.0207441	-0.00605308	0.0205112	-0.017536	0.0169843	-0.0208615	-0.0117444	0.0119003	0.0266803	-0.00623881	0.00524964	-0.0177393	0.0146381	-0.0199887	-0.0114581	-0.0121197	-0.0118484	-0.000570114	0.00756288	-0.0134813	-0.00100036	-0.00284478
1	1	1	1	0.406109	0.948445	0.0460123	-0.019981	0.0555465	0.00785719	-0.0207441	0.0134319	0.0394271	-0.017536	0.0180915	-0.0345071	-0.010387	0.0236298	0.0390642	-0.00809507	0.008474	-0.0230393	0.03135	0.0211981	-0.0114581	-0.0162634	-0.0134802	0.0295359	0.0216793	-0.0129549	-0.0131584	-0.0326072
1	1	1	1	0.406109	0.948445	0.0305244	-0.019981	0.0318531	0.0152883	-0.0207441	0.0187882	0.0362328	-0.017536	0.0136507	-0.0297442	-0.00761553	0.0172778	0.0315128	-0.00949387	0.0124906	-0.0247077	0.0504323	-0.0142638	-0.0114581	-0.0162634	-0.0232912	0.0171866	0.0219796	-0.0230769	-0.00846715	-0.0228085
1	1	1	1	0.406109	0.948445	0.0306339	-0.019981	0.0286506	0.00431943	-0.0207441	-0.00507431	0.0249597	-0.017536	0.0162664	-0.0243469	-0.00778582	0.0202921	0.0287092	-0.0055977	0.00411632	-0.0173658	0.0162162	-0.00245766	-0.0114581	-0.0162634	-0.0106376	0.0102555	0.0116586	-0.0118255	-0.0066236	-0.0136287
1	1	1	1	0.406109	0.948445	0.027249	-0.019981	0.0273266	0.00869317	-0.0207441	0.00570037	0.0287978	-0.017536	0.0145138	-0.0271842	-0.00795677	0.0186677	0.0291101	-0.00664983	0.00766869	-0.0192943	0.017807	0.0166463	-0.0114581	-0.0162634	-0.013144	0.0215761	0.0177082	-0.0127962	-0.0126867	-0.0286766
1	1	1	1	0.406109	0.948445	0.0311841	-0.019981	-0.0207151	0.0220844	-0.0052837	0.125678	0.0698608	-0.017536	-0.0245035	-0.0318521	-0.0374027	0.00820945	0.0390362	-0.0315245	0.00110773	-0.0352051	0.0662771	0.12669	-0.0114581	-0.0162634	-0.0370317	0.111371	0.0657207	-0.0196868	-0.0680163	-0.134732
1	1	1	1	0.406109	0.948445	0.00525808	-0.019981	0.00560226	6.692e-05	-0.0207441	-0.00747169	0.00744176	-0.017536	0.0107224	-0.0126514	-0.0118393	0.00184093	0.0163092	-0.00448814	0.00491386	-0.011866	0.0108372	-0.0188289	-0.0114581	-0.0126161	-0.0114798	-0.00127005	0.00691498	-0.0130063	-0.00116424	-0.00284909
1	1	1	1	0.406109	0.948445	0.0103739	-0.019981	0.00442009	0.00291887	-0.0207441	-0.00747169	0.0116451	-0.017536	0.0119814	-0.016206	-0.00633997	0.0110508	0.0186584	-0.00396947	0.00473186	-0.0134542	0.0110148	-0.010052	-0.0114581	-0.0161721	-0.0110487	0.00365412	0.00881423	-0.0122494	-0.00433905	-0.00861682
1	1	1	1	0.406109	0.948445	0.0375871	-0.019981	0.0184795	0.0226276	-0.0207441	0.0509514	0.0543181	-0.017536	0.00565496	-0.0373952	-0.00756305	0.0279112	0.0385924	-0.0134943	0.00917152	-0.026437	0.0595477	0.0513921	-0.0114581	-0.0162634	-0.0272718	0.0619708	0.0415825	-0.0196281	-0.0298398	-0.0692207
1	1	0	0	0.406109	0.948445	-0.0227141	-0.0129368	-0.0207151	-0.00399299	-0.0132721	-0.00747169	-0.0166916	-0.017536	-0.00336508	-0.00117646	-0.0107045	-0.01009	-0.0019405	-0.00174987	0.000789847	0.00176256	0.0103048	-0.0235095	-0.0114581	-0.010886	-0.011573	-0.00421716	0.00570565	-0.013288	-3.95947e-05	-7.18622e-06
1	1	1	1	0.406109	0.948445	0.0211397	-0.019981	0.00558409	0.0099034	-0.0207441	0.0123067	0.0325641	-0.017536	0.0114791	-0.0307118	-0.00219193	0.027948	0.0275237	-0.00445797	0.00284241	-0.0151168	0.024773	0.053734	-0.0114581	-0.0162634	-0.0134993	0.0473403	0.0283471	-0.00995438	-0.0260253	-0.0544914
1	1	1	1	0.406109	0.948445	0.0145989	-0.019981	-0.0186764	0.0210533	-0.0207441	0.0380364	0.0438834	-0.017536	0.00398413	-0.034089	-0.0021555	0.0286845	0.0255688	-0.00759952	0.00460191	-0.0189448	0.0370486	0.0803491	-0.0114581	-0.0162634	-0.0224361	0.070515	0.0415699	-0.0130706	-0.0389436	-0.082212
1	1	1	1	0.406109	0.948445	0.0247906	-0.019981	0.0165053	0.00772695	-0.0207441	0.000989767	0.0271359	-0.017536	0.0140334	-0.0262876	-0.00354921	0.0238983	0.0269673	-0.00506614	0.00401432	-0.0164372	0.0233204	0.0131982	-0.0114581	-0.0162634	-0.0138734	0.0221029	0.0181937	-0.0129344	-0.0141315	-0.0283688
1	1	1	1	0.406109	0.948445	0.19057	-0.019981	0.0494	0.486063	0.220933	0.38487	0.157948	-0.017536	-0.447532	0.10463	-0.420208	-0.403458	-0.0950258	-0.46913	0.480838	-0.361693	0.045317	0.167412	-0.0114581	-0.0162634	-0.0288747	0.129052	0.0673514	-0.00748371	-0.113324	-0.168277
1	1	1	1	0.406109	0.948445	0.0230053	-0.019981	0.0184008	0.0109558	-0.0207441	0.00503451	0.0273878	-0.017536	0.0126705	-0.0268056	-0.00148599	0.0225817	0.0253627	-0.00526104	0.00780217	-0.0189141	0.0256948	0.0111063	-0.0114581	-0.0162634	-0.0143118	0.0214069	0.0183377	-0.0139596	-0.0131956	-0.0278154
1	1	1	1	0.406109	0.948445	0.0479979	-0.019981	0.0508756	0.0179846	-0.0207441	0.0295985	0.0505628	-0.017536	0.0147659	-0.0396836	-0.00607347	0.0290563	0.0413738	-0.0108862	0.0122589	-0.0285438	0.0420149	0.0420017	-0.0114581	-0.0162634	-0.0203021	0.0480473	0.0321793	-0.0155084	-0.0206788	-0.0528731
1	1	1	1	0.406109	0.948445	0.0357918	-0.019981	0.0344505	0.0108974	-0.0207441	0.0183254	0.0389144	-0.017536	0.0141273	-0.0340237	-0.00623556	0.0258586	0.0351053	-0.00743848	0.00728603	-0.0206003	0.0304874	0.0408386	-0.0114581	-0.0162634	-0.0156556	0.0412621	0.0272929	-0.0128123	-0.0204157	-0.0476378
1	1	1	1	0.406109	0.948445	0.0196503	-0.019981	-0.00430408	0.0208618	-0.0207441	0.0408744	0.0429204	-0.017536	0.004796	-0.0328514	-0.00571969	0.0235323	0.0284892	-0.00989193	0.00806146	-0.0214011	0.0483859	0.0534597	-0.0114581	-0.0162634	-0.0258577	0.0568509	0.0389501	-0.0191383	-0.0328379	-0.0709127
1	1	1	1	0.406109	0.948445	0.0186137	-0.019981	0.0227629	0.00299094	-0.0207441	-0.0044068	0.0167518	-0.017536	0.0140421	-0.0189084	-0.00879717	0.00973053	0.0225094	-0.0052683	0.00695192	-0.0163646	0.0178869	-0.0176764	-0.0114581	-0.0146316	-0.0126654	0.00194063	0.00921264	-0.0143133	-0.00228709	-0.00579119
1	1	1	1	0.406109	0.948445	0.0159321	-0.019981	0.0194131	0.0025157	-0.0207441	-0.00526139	0.0147715	-0.017536	0.0132073	-0.0177351	-0.00876893	0.00867095	0.0210194	-0.00500907	0.00651714	-0.01538	0.0170907	-0.0183628	-0.0114581	-0.0141015	-0.0124484	0.00118458	0.00875576	-0.0141258	-0.00204025	-0.00504163
1	1	1	1	0.406109	0.948445	-0.0227141	-0.00778678	-0.0207151	0.000286528	-0.013776	-0.00747169	-0.0117018	-0.017536	0.000271284	-0.000785202	-0.00580755	-0.00237264	-0.00132385	-0.00108678	-0.000125086	-0.00159942	0.00773204	-0.0202587	-0.0114581	-0.010586	-0.010494	-0.00288068	0.00553579	-0.0119519	-0.00159048	-0.00113344
1	1	1	1	0.406109	0.948445	0.0391477	-0.019981	0.0430491	0.00862508	-0.0207441	0.0137526	0.0376222	-0.017536	0.0161223	-0.0340086	-0.00873722	0.0246551	0.0362055	-0.00719771	0.00737501	-0.0208925	0.0218249	0.0438252	-0.0114581	-0.0162634	-0.0123696	0.0393054	0.0246045	-0.00998252	-0.0193706	-0.0449957
1	1	1	1	0.406109	0.948445	0.0305552	-0.019981	0.0339365	0.00770508	-0.0207441	0.000652619	0.027375	-0.017536	0.0160154	-0.0262424	-0.00649558	0.0192955	0.0289876	-0.00643885	0.00838054	-0.0209697	0.0223391	-0.00236223	-0.0114581	-0.0162634	-0.0122114	0.0119567	0.0135003	-0.0134333	-0.00646194	-0.0156503
1	1	1	1	0.406109	0.948445	-0.0102194	-0.019981	-0.0207151	0.00482765	-0.0207441	-0.00747169	0.0121833	-0.017536	0.00842898	-0.0189534	0.00424294	0.0203293	0.00833396	0.00265253	-0.00306381	-0.00495609	-0.03072	0.064296	-0.0114581	-0.0162634	-0.000285672	0.0309389	0.0125432	0.00368688	-0.0427175	-0.0511979
1	1	1	1	0.406109	0.948445	0.0285441	-0.019981	0.0366061	7.46304e-05	-0.0207441	-0.00631357	0.0197295	-0.017536	0.0169582	-0.0208701	-0.0120113	0.0117054	0.0270439	-0.00601323	0.00515786	-0.0166964	0.0146247	-0.0202898	-0.0114581	-0.0116293	-0.0116419	-0.000803618	0.00736587	-0.0133285	-0.000761461	-0.00237656
1	1	1	1	0.406109	0.948445	0.0451393	-0.019981	0.0531875	0.00887623	-0.0207441	0.00937561	0.0374557	-0.017536	0.0195449	-0.0307739	-0.00841152	0.022231	0.0370866	-0.0088025	0.00951503	-0.025521	0.0402121	-0.0215975	-0.0114581	-0.0162634	-0.0176047	0.0078718	0.0153207	-0.0196619	-0.00464039	-0.0117986
1	1	1	1	0.406109	0.948445	0.00304348	-0.019981	-0.0164942	0.00732079	-0.0207441	-0.00542546	0.015418	-0.017536	0.00915247	-0.0198193	0.00257806	0.020971	0.015105	-0.00140938	0.00173828	-0.00967327	0.0240449	0.00633835	-0.0114581	-0.0162634	-0.0137052	0.0182635	0.0166847	-0.0135102	-0.0148648	-0.0255748
1	1	1	1	0.406109	0.948445	0.024949	-0.019981	0.0292256	0.00338509	-0.0207441	-0.00506018	0.0210257	-0.017536	0.0164564	-0.0210897	-0.00965535	0.0124784	0.0255298	-0.00569776	0.00712961	-0.0189166	0.0151623	-0.0134916	-0.0114581	-0.0147545	-0.0118527	0.00338654	0.00917378	-0.0130424	-0.00262095	-0.00683772
1	1	1	1	0.406109	0.948445	0.0364432	-0.019981	0.0362653	0.0186942	-0.0207441	0.024218	0.0429983	-0.017536	0.0135026	-0.034013	-0.0056857	0.0232184	0.0346846	-0.0103996	0.01319	-0.0271068	0.0436204	0.0139238	-0.0114581	-0.0162634	-0.0231034	0.0321587	0.0271647	-0.0198117	-0.0150503	-0.038843
1	1	1	1	0.406109	0.948445	0.0428113	-0.019981	0.0534486	0.00296849	-0.0207441	-0.00187199	0.0306618	-0.017536	0.0211981	-0.0273401	-0.0114891	0.0180059	0.0346535	-0.00718182	0.00752532	-0.022954	0.0175994	-0.0124752	-0.0114581	-0.0154909	-0.0124258	0.00497346	0.0102342	-0.0135667	-0.00328103	-0.0084712
1	1	1	1	0.406109	0.948445	0.0293854	-0.019981	0.033828	0.00687499	-0.0207441	0.000290494	0.0269081	-0.017536	0.0169251	-0.0253436	-0.00899993	0.0157499	0.0290208	-0.00682442	0.0089532	-0.0219222	0.0201225	-0.00667433	-0.0114581	-0.0162634	-0.0139225	0.00962566	0.0129185	-0.0143721	-0.00534432	-0.0139688
1	1	1	1	0.406109	0.948445	0.0446997	-0.019981	0.05861	0.00293601	-0.0207441	0.000867529	0.0314342	-0.017536	0.0208907	-0.0280117	-0.011204	0.0176028	0.0354965	-0.00721382	0.00803351	-0.022559	0.0205346	-0.0120796	-0.0114581	-0.0156508	-0.0120901	0.0060271	0.0108102	-0.0136994	-0.00331912	-0.00881858
1	0	0	0	0.406109	0.948445	-0.0227141	0.00882911	-0.0207151	-0.00617377	0.0312983	-0.00747169	-0.0265393	0.00969708	-0.0141538	0.016717	0.00638663	-0.00981634	-0.0253895	0.00547558	-0.00756678	0.0182021	-0.00379582	-0.0198708	-0.0114581	-0.00582499	-0.00645248	-0.00616648	0.00153793	-0.00798274	-0.00457871	0.00198579
1	1	1	0	0.406109	0.948445	0.00824109	-0.0130211	-8.00318e-06	0.00119894	-0.0207441	-0.00747169	0.00675101	-0.017536	0.00959032	-0.0141187	-0.0049224	0.0138201	0.0156286	-0.00358176	0.00153178	-0.00951687	0.00957308	-0.0188291	-0.0114581	-0.0101719	-0.0100551	-0.00170414	0.00591494	-0.011598	-0.00172357	-0.00159105
1	1	1	1	0.406109	0.948445	0.0407737	-0.019981	0.0508885	0.00215049	-0.0207441	0.000609629	0.0291552	-0.017536	0.0191452	-0.0268388	-0.0122952	0.0168465	0.0343092	-0.00678524	0.00623007	-0.0194247	0.0195298	-0.00637666	-0.0114581	-0.0162634	-0.0112927	0.00837306	0.0114713	-0.0128384	-0.00524549	-0.0118902
1	1	1	1	0.406109	0.948445	0.0422739	-0.019981	0.0531144	0.00226496	-0.0207441	-0.00178894	0.029864	-0.017536	0.0210754	-0.0266732	-0.0124265	0.0167164	0.0344942	-0.00707463	0.00704014	-0.0218695	0.0145892	-0.0100968	-0.0114581	-0.0151313	-0.0112719	0.00515368	0.00966092	-0.0125151	-0.00316446	-0.00832949
1	1	1	1	0.406109	0.948445	0.00353983	-0.019981	0.00886029	-0.000326236	-0.0207441	-0.00659433	0.00469009	-0.017536	0.00766051	-0.0128543	-0.0083943	0.00276137	0.0138126	-0.00417293	0.00480215	-0.0100542	0.0135066	-0.0209675	-0.0114581	-0.0119151	-0.0114959	-0.00184087	0.0068816	-0.0133002	-0.000922169	-0.00196489
1	1	0	1	0.406109	0.948445	-0.0227141	-0.0143454	-0.0207151	-0.00329619	-0.0171602	-0.00747169	-0.012966	-0.017536	-0.00097815	-0.00215709	-0.0100869	-0.00882427	-9.53396e-05	-0.00196605	0.00147272	-0.000575796	0.0112714	-0.0233856	-0.0114581	-0.0112193	-0.0117191	-0.00386341	0.00597276	-0.0134128	-0.000227092	-0.000348874
1	1	1	1	0.406109	0.948445	0.0389895	-0.019981	0.0500069	0.00230157	-0.0207441	-0.00249267	0.0281704	-0.017536	0.0201093	-0.0254435	-0.0114732	0.0158321	0.0321822	-0.00684173	0.00699586	-0.0214422	0.0201857	-0.0175614	-0.0114581	-0.0135082	-0.012413	0.00282884	0.00951407	-0.014036	-0.00189536	-0.00553364
1	1	1	1	0.406109	0.948445	0.040075	-0.019981	0.0337574	0.0173642	-0.0207441	0.0348423	0.0487517	-0.017536	0.0114078	-0.0378618	-0.00740823	0.0280762	0.0390042	-0.0106675	0.00937574	-0.0249678	0.0403706	0.0574693	-0.0114581	-0.0162634	-0.0212963	0.0564863	0.035822	-0.0143701	-0.0278087	-0.0644587
1	1	1	1	0.406109	0.948445	0.0250239	-0.019981	0.0302978	0.00493367	-0.0207441	9.32405e-05	0.0229893	-0.017536	0.01647	-0.0220086	-0.0113984	0.0104792	0.0271961	-0.00663391	0.00858875	-0.0198245	0.0211858	-0.0165495	-0.0114581	-0.0162634	-0.0141418	0.00428044	0.0110303	-0.0156206	-0.00304401	-0.00848673
1	1	1	1	0.406109	0.948445	0.0163305	-0.019981	0.0155069	0.00239149	-0.0207441	-0.00413222	0.0157054	-0.017536	0.013454	-0.0181473	-0.0109029	0.0087162	0.0229904	-0.00506621	0.00524866	-0.0136965	0.0129168	-0.00658973	-0.0114581	-0.0162634	-0.0112863	0.0058288	0.0101353	-0.0126781	-0.00553658	-0.0114545
1	1	1	1	0.406109	0.948445	0.0114539	-0.019981	0.0163462	0.000695301	-0.0207441	-0.00567121	0.01055	-0.017536	0.0116233	-0.0149623	-0.010289	0.00396516	0.01886	-0.00482028	0.00607198	-0.0132959	0.0131424	-0.0192023	-0.0114581	-0.0128239	-0.0118098	-0.000741376	0.00740855	-0.013347	-0.00131057	-0.00317471
1	1	1	1	0.406109	0.948445	-0.0135856	-0.00761522	-0.0207151	-0.00483872	-0.0207441	-0.00747169	-0.00693802	-0.017536	0.00730663	-0.00614045	0.00549772	0.0129969	0.0052067	0.00263393	-0.00496502	0.000745062	-0.000211375	-0.00442038	-0.0114581	-0.00955998	-0.00496221	0.00472757	0.00549766	-0.00605942	-0.0109101	-0.00773443
1	1	1	1	0.406109	0.948445	-0.0160092	-0.0183537	-0.0207151	0.000491131	-0.0207441	-0.00747169	0.00231211	-0.017536	0.00792636	-0.0135791	0.00729498	0.0180223	0.00444937	0.00382733	-0.00336637	-0.00167398	-0.0113702	0.03508	-0.0114581	-0.0162634	-0.00572214	0.0216156	0.0122649	-0.00327585	-0.0289926	-0.0363424
1	1	1	1	0.406109	0.948445	0.0285482	-0.019981	0.0366052	0.000197566	-0.0207441	-0.00619048	0.0197221	-0.017536	0.0167986	-0.0210527	-0.0118791	0.0119567	0.0271033	-0.00603899	0.00520794	-0.0166286	0.0144613	-0.0192303	-0.0114581	-0.0119211	-0.0114843	-0.000250285	0.00751694	-0.0131725	-0.000932159	-0.00285977
1	1	1	1	0.406109	0.948445	0.04131	-0.019981	0.0473107	0.00766607	-0.0207441	0.0113153	0.0370545	-0.017536	0.0168976	-0.0335505	-0.00969902	0.024048	0.036691	-0.00722815	0.00730141	-0.0210316	0.02475	0.0313668	-0.0114581	-0.0162634	-0.0118616	0.0329101	0.0220362	-0.0109331	-0.0152324	-0.0366691
1	0	0	0	0.406109	0.948445	-0.0227141	-0.0084964	-0.0207151	-0.00270722	-0.00331723	-0.00747169	-0.0203595	-0.0136279	-0.00577764	0.00178561	-0.00796916	-0.00949079	-0.00651371	-0.000991889	-0.000531581	0.00337794	0.00777795	-0.0225812	-0.0114581	-0.0104982	-0.0108879	-0.00480799	0.00498197	-0.0124887	-0.000529639	0.000159284
1	1	1	1	0.406109	0.948445	0.0436483	-0.019981	0.0576249	0.00148158	-0.0207441	-0.00206229	0.0292682	-0.017536	0.0208659	-0.0269789	-0.0117635	0.0167739	0.0345179	-0.00701321	0.00736023	-0.0221431	0.0154071	-0.013691	-0.0114581	-0.0133817	-0.0109883	0.00309828	0.00874715	-0.0125232	-0.00231581	-0.0059535
1	1	1	1	0.406109	0.948445	0.0407938	-0.019981	0.0417451	0.0175035	-0.0207441	0.026978	0.0460817	-0.017536	0.0141081	-0.0361009	-0.00843663	0.0241372	0.0381347	-0.0108215	0.0122202	-0.0269946	0.0365089	0.0349047	-0.0114581	-0.0162634	-0.0199761	0.0415829	0.029428	-0.0162678	-0.0191287	-0.04829
1	1	1	1	0.406109	0.948445	0.0365409	-0.019981	0.0390446	0.0142095	-0.0207441	0.013111	0.038399	-0.017536	0.0154271	-0.0330026	-0.00419518	0.0250329	0.0333919	-0.00802283	0.010931	-0.0248589	0.0287811	0.0213508	-0.0114581	-0.0162634	-0.0161511	0.0299291	0.0225637	-0.0142523	-0.0136291	-0.0346323
1	1	1	1	0.406109	0.948445	0.0480431	-0.019981	0.0616641	0.00477785	-0.0207441	0.00247437	0.0349985	-0.017536	0.0212227	-0.0306475	-0.01025	0.0211886	0.0373094	-0.00778653	0.00861413	-0.0245968	0.0242833	-0.00972252	-0.0114581	-0.0162634	-0.0126611	0.00869032	0.0123376	-0.0140612	-0.00431077	-0.0113215
1	1	1	1	0.406109	0.948445	0.0465343	-0.019981	0.050247	0.014989	-0.0207441	0.0200321	0.0454885	-0.017536	0.0167736	-0.0361474	-0.0060067	0.0274796	0.0392925	-0.00988039	0.0110438	-0.0274091	0.0414926	0.0158584	-0.0114581	-0.0162634	-0.0193244	0.0317937	0.0252942	-0.0171245	-0.0139135	-0.0359384
1	1	1	1	0.406109	0.948445	0.0215587	-0.019981	0.0199232	0.00679616	-0.0207441	-0.00156876	0.0219433	-0.017536	0.0134045	-0.0238772	-0.0026767	0.0194105	0.024118	-0.00455097	0.00682022	-0.0171035	0.0212138	0.00371136	-0.0114581	-0.0162634	-0.0119566	0.0152107	0.0145764	-0.0126687	-0.00894866	-0.0195279
1	1	1	1	0.406109	0.948445	0.0293146	-0.019981	0.0376198	5.48988e-05	-0.0207441	-0.0060653	0.0199541	-0.017536	0.0170775	-0.0212016	-0.0119986	0.011867	0.0276181	-0.00600943	0.00535837	-0.0167814	0.0138804	-0.018935	-0.0114581	-0.0120597	-0.0114919	-0.000282549	0.00747278	-0.0131178	-0.00107519	-0.00301239
1	0	0	0	0.406109	0.948445	-0.0227141	-0.00759905	-0.0207151	-0.00404556	-0.00278941	-0.00747169	-0.0229647	-0.0108293	-0.00675636	0.00228737	-0.00727894	-0.00969093	-0.0074809	-0.000355753	-0.00103121	0.00517466	0.00613292	-0.0225873	-0.0114581	-0.00970954	-0.0102422	-0.00556446	0.00430713	-0.0118971	-0.000867653	0.000611348
1	1	1	1	0.406109	0.948445	-0.0021126	-0.0197664	-0.0060691	0.000870423	-0.0207441	-0.00747169	0.00383238	-0.017536	0.00805373	-0.0108543	-0.01122	0.000797696	0.0128873	-0.00420008	0.00437044	-0.0103782	0.0106013	-0.018889	-0.0114581	-0.0132901	-0.0118589	-0.00138601	0.00699882	-0.0131625	-0.00143836	-0.00321541
1	1	1	1	0.406109	0.948445	0.037912	-0.019981	-0.0207151	0.0254523	-0.00953029	0.139395	0.0768216	-0.017536	-0.0268979	-0.0337863	-0.0373458	0.0106483	0.0445645	-0.0350859	0.00328781	-0.0375457	0.103589	0.0980841	-0.0114581	-0.0162634	-0.0428883	0.109313	0.0700741	-0.0291042	-0.0556494	-0.123315
1	1	1	1	0.406109	0.948445	0.0327305	-0.019981	0.0424373	-4.40391e-05	-0.0207441	-0.00591323	0.0216806	-0.017536	0.0182894	-0.0223863	-0.0122605	0.0129381	0.0294678	-0.0061292	0.00583097	-0.0176429	0.0139999	-0.018538	-0.0114581	-0.0121168	-0.011517	2.4799e-05	0.00759284	-0.0130733	-0.00110228	-0.00323755
1	1	1	1	0.406109	0.948445	0.0325165	-0.019981	0.0298285	0.0156573	-0.0207441	0.025317	0.0411059	-0.017536	0.0118986	-0.0350476	-0.00660466	0.0242711	0.0339601	-0.00866786	0.0102477	-0.0227859	0.0352659	0.046023	-0.0114581	-0.0162634	-0.0176723	0.0468468	0.0308132	-0.0144359	-0.0219922	-0.0535942
1	1	1	1	0.406109	0.948445	0.00308501	-0.019981	-0.0207151	0.00395085	-0.0207441	-0.00474995	0.0188663	-0.017536	0.00999821	-0.0245153	0.00518394	0.0271078	0.0173207	0.000671339	-0.00181602	-0.00674955	0.0191917	0.0511	-0.0114581	-0.0162634	-0.0101084	0.0439569	0.0251891	-0.00755772	-0.0253203	-0.049119
1	1	1	1	0.406109	0.948445	0.0499626	-0.019981	0.0646754	0.00513224	-0.0207441	0.00368688	0.0372508	-0.017536	0.0227332	-0.0307636	-0.0114907	0.0199937	0.0384521	-0.00825306	0.009291	-0.0259847	0.0269746	-0.0150445	-0.0114581	-0.0158299	-0.0139775	0.0070576	0.0123006	-0.015333	-0.00303711	-0.00928263
1	1	1	1	0.406109	0.948445	0.0364334	-0.019981	0.0436055	0.00290134	-0.0207441	0.00147441	0.0278994	-0.017536	0.0178116	-0.0262635	-0.00994805	0.0173675	0.0324137	-0.00620455	0.00606961	-0.0182348	0.0230284	-0.00498402	-0.0114581	-0.0162634	-0.0128892	0.0105532	0.0132877	-0.0141523	-0.00688174	-0.0151035
1	1	1	1	0.406109	0.948445	0.0306439	-0.019981	0.0200345	0.0144677	-0.0207441	0.0258141	0.0396685	-0.017536	0.0105336	-0.0326778	-0.00406075	0.0268255	0.0326726	-0.00820034	0.00655927	-0.0200707	0.0521301	0.0192042	-0.0114581	-0.0162634	-0.0205787	0.0371316	0.0290171	-0.0186189	-0.02008	-0.0429537
1	1	1	1	0.406109	0.948445	-0.0227141	-0.00246286	-0.0207151	-0.00385327	-0.015095	-0.00747169	-0.0168348	-0.017536	0.00242785	0.000588531	0.00329371	0.00456268	-0.0029697	0.00300099	-0.00442085	0.00398625	-0.0130151	0.000544951	-0.0114581	-0.0131194	-0.00395556	0.00199912	0.00323536	-0.00436369	-0.0133776	-0.00938956
1	1	1	1	0.406109	0.948445	0.0280266	-0.019981	-0.0207151	0.0207522	0.00405786	0.13571	0.0727415	-0.017536	-0.028613	-0.030266	-0.0411654	0.0060285	0.0375124	-0.034433	-0.00186662	-0.0350978	0.0915836	0.112742	-0.0114581	-0.0162634	-0.0425265	0.113774	0.0708485	-0.0260597	-0.0667643	-0.134741
1	1	1	1	0.406109	0.948445	0.0102326	-0.019981	-0.000619894	0.0079275	-0.0207441	-0.00520939	0.016887	-0.017536	0.0102629	-0.0214425	0.00149191	0.0208682	0.0180852	-0.00278276	0.0047571	-0.0133625	0.0159631	0.0153332	-0.0114581	-0.0162634	-0.010316	0.0206787	0.0158456	-0.0106344	-0.01305	-0.0256247
1	1	1	1	0.406109	0.948445	0.0421321	-0.019981	0.0491699	0.00499201	-0.0207441	-0.00185345	0.0317117	-0.017536	0.0206936	-0.0280779	-0.0100981	0.0206242	0.0343967	-0.0072901	0.00751878	-0.0235002	0.0182145	-0.00849396	-0.0114581	-0.0162634	-0.0125545	0.0073257	0.0112915	-0.0133606	-0.00468122	-0.0113259
1	1	1	1	0.406109	0.948445	0.0434422	-0.019981	0.052281	0.00780303	-0.0207441	0.00737818	0.0360282	-0.017536	0.018224	-0.0324077	-0.00806401	0.0237253	0.0361611	-0.00741422	0.00860936	-0.0231692	0.0225928	0.014836	-0.0114581	-0.0162634	-0.0122349	0.0226261	0.0178763	-0.0123908	-0.0106113	-0.026196
1	1	1	1	0.406109	0.948445	0.0352418	-0.019981	0.0476985	0.000762833	-0.0207441	-0.00319871	0.0238326	-0.017536	0.0180312	-0.023674	-0.0112047	0.0137387	0.02993	-0.00646023	0.00629076	-0.0188142	0.0161899	-0.0176572	-0.0114581	-0.0125215	-0.0114851	0.0011551	0.00822049	-0.0131918	-0.0015352	-0.00410166
1	0	1	0	0.406109	0.948445	-0.0160421	-0.00299513	-0.0207151	-0.00929369	-0.0207441	-0.00747169	-0.0103984	-0.017536	0.00718026	-0.0040328	0.00752642	0.0110924	0.00234875	0.00508554	-0.00731679	0.00322363	-0.0309951	0.0155603	-0.0114581	-0.0043608	0.00634881	0.00612211	-0.00117775	0.00609993	-0.0242114	-0.0113438
1	1	1	1	0.406109	0.948445	-0.00924468	-0.0198187	-0.00935821	-0.00204702	-0.0207441	-0.00747169	-0.00294249	-0.017536	0.00501041	-0.00799688	-0.0119268	-0.00439797	0.00965251	-0.00331083	0.00375576	-0.00560591	0.0111253	-0.0208444	-0.0114581	-0.0122299	-0.0116874	-0.00234594	0.00659468	-0.0133041	-0.000731555	-0.00189467
1	1	1	1	0.406109	0.948445	0.0291271	-0.019981	0.0201823	0.0193356	-0.0207441	0.0244195	0.0412434	-0.017536	0.0112565	-0.0340937	-0.00250464	0.0257338	0.0307873	-0.00863935	0.0113402	-0.0249602	0.0369034	0.0399752	-0.0114581	-0.0162634	-0.0218365	0.0444474	0.0310682	-0.0161511	-0.0235215	-0.0543118
1	1	1	1	0.406109	0.948445	0.0384312	-0.019981	0.0449576	0.0133988	-0.0207441	0.0160688	0.0383052	-0.017536	0.0161337	-0.0322615	-0.00647113	0.0213969	0.0349024	-0.0090711	0.0122175	-0.0256818	0.0353829	0.00795442	-0.0114581	-0.0162634	-0.0189538	0.0245551	0.0220258	-0.0174169	-0.0118142	-0.0301291
1	1	1	1	0.406109	0.948445	0.0418058	-0.019981	0.0491895	0.00458072	-0.0207441	0.00266376	0.0322793	-0.017536	0.0192914	-0.0288159	-0.0113874	0.0194234	0.035561	-0.00742658	0.00683449	-0.0215234	0.0212616	-0.00309382	-0.0114581	-0.0162634	-0.0132097	0.0116709	0.0136379	-0.0138921	-0.00664521	-0.0159362
1	1	1	1	0.406109	0.948445	0.0353933	-0.019981	0.0422886	0.00249909	-0.0207441	-0.00394783	0.0257903	-0.017536	0.0188634	-0.0241953	-0.00996177	0.0163536	0.0305336	-0.00614095	0.00623259	-0.0195118	0.0180027	-0.0141119	-0.0114581	-0.0148862	-0.0117725	0.00356912	0.00947317	-0.0132597	-0.00303701	-0.00700911
1	1	1	1	0.406109	0.948445	0.00428806	-0.019981	-0.0203429	0.00462866	-0.0207441	-0.00370907	0.0196252	-0.017536	0.0105218	-0.0243943	0.00451085	0.0274896	0.0182609	6.76446e-05	-0.00176731	-0.00739283	0.0278165	0.0388684	-0.0114581	-0.0162634	-0.0115948	0.0392417	0.0246747	-0.0103596	-0.0222607	-0.0440622
1	1	1	1	0.406109	0.948445	0.0216014	-0.019981	0.0129065	0.00688534	-0.0207441	-0.00746752	0.0216489	-0.017536	0.0139463	-0.0224904	-0.00124342	0.023082	0.0230874	-0.00436738	0.00414299	-0.0161586	0.0277837	-0.0144951	-0.0114581	-0.0162634	-0.0137632	0.00778967	0.012548	-0.0149973	-0.00554173	-0.0106021
1	1	1	1	0.406109	0.948445	0.0106925	-0.019981	0.0156354	0.001074	-0.0207441	-0.00528443	0.00997056	-0.017536	0.0106733	-0.0154767	-0.00821073	0.00545851	0.0181042	-0.00451816	0.0059488	-0.0126174	0.0162984	-0.0193581	-0.0114581	-0.0135346	-0.0119652	6.70185e-06	0.00808027	-0.0138112	-0.00178664	-0.00397077
1	1	1	1	0.406109	0.948445	0.0403344	-0.019981	0.0468706	0.00362385	-0.0207441	0.00103864	0.0307721	-0.017536	0.0192289	-0.0281555	-0.0124138	0.0190949	0.0348446	-0.00711705	0.00604359	-0.020492	0.0174984	0.00258962	-0.0114581	-0.0162634	-0.0116805	0.0132564	0.0134496	-0.0123697	-0.00753789	-0.0176041
1	1	1	1	0.406109	0.948445	0.0315369	-0.019981	0.0400581	0.000757336	-0.0207441	-0.0053674	0.0222662	-0.017536	0.0180282	-0.021901	-0.0122515	0.0123111	0.0284617	-0.00641548	0.00563096	-0.0184641	0.0137109	-0.0182717	-0.0114581	-0.012168	-0.0114584	0.000103043	0.00759423	-0.0130373	-0.00112413	-0.00330639
1	1	1	1	0.406109	0.948445	0.0497613	-0.019981	0.0656593	0.00617757	-0.0207441	0.00736634	0.0376502	-0.017536	0.0210509	-0.0318781	-0.00952299	0.0210591	0.0384723	-0.00814467	0.00987901	-0.0252464	0.0342376	-0.0125126	-0.0114581	-0.0162634	-0.0144808	0.0106969	0.0145944	-0.0161876	-0.00461722	-0.0127117
1	0	0	0	0.406109	0.948445	-0.0227141	0.0444726	-0.0207151	-0.0118328	0.0381917	-0.00747169	-0.0265393	0.0554368	-0.0157716	0.0459548	0.0213273	-0.0212652	-0.0418526	0.0153851	-0.014172	0.0330529	-0.0415133	-0.011721	0.0294613	0.0327988	0.0265549	-0.0394628	-0.0335623	0.025332	-0.0335629	0.0202365
1	1	1	1	0.406109	0.948445	0.0492105	-0.019981	0.0623293	0.00851981	-0.0207441	0.0114617	0.0396683	-0.017536	0.0200495	-0.032846	-0.00891255	0.0221479	0.0393204	-0.00881008	0.0104775	-0.0256392	0.0330345	-0.0030974	-0.0114581	-0.0162634	-0.0156141	0.0161797	0.0173672	-0.016615	-0.00757911	-0.0198571
1	1	1	1	0.406109	0.948445	0.0110736	-0.019981	0.00149679	0.00718014	-0.0207441	-0.00163262	0.0178752	-0.017536	0.0117505	-0.0197691	-0.00682079	0.0135967	0.0209117	-0.00498087	0.005242	-0.0140642	0.0224975	-0.00372058	-0.0114581	-0.0162634	-0.0153213	0.0118713	0.0148119	-0.0154997	-0.00987445	-0.0193269
1	1	1	1	0.406109	0.948445	0.0471458	-0.019981	0.0358978	0.0211492	-0.0207441	0.0646669	0.0594799	-0.017536	0.00587431	-0.0404024	-0.0149016	0.024569	0.0466179	-0.0169213	0.0118879	-0.0303552	0.0500734	0.0827363	-0.0114581	-0.0162634	-0.0247717	0.0756736	0.0463728	-0.0171201	-0.0363553	-0.0862884
1	1	1	1	0.406109	0.948445	-0.00421345	-0.019981	-0.00523779	-0.000752594	-0.0207441	-0.00747169	0.00213359	-0.017536	0.00769079	-0.00924419	-0.0127525	-0.00331477	0.0119384	-0.0039423	0.00427149	-0.00905019	0.011036	-0.019712	-0.0114581	-0.0123993	-0.0118121	-0.00155057	0.00690109	-0.0132074	-0.000863815	-0.00251641
1	1	1	1	0.406109	0.948445	0.0337945	-0.019981	0.0371222	0.00428955	-0.0207441	-0.00440508	0.0261196	-0.017536	0.0177874	-0.0248892	-0.00818063	0.0187218	0.0297816	-0.00610789	0.00618187	-0.0200976	0.0140414	-0.00766844	-0.0114581	-0.0162634	-0.0114739	0.00606962	0.0100497	-0.0122877	-0.0050954	-0.010604
1	1	1	1	0.406109	0.948445	-0.0201751	-0.00936758	-0.0207151	-0.00129149	-0.0207441	-0.00747169	-0.00835015	-0.017536	0.00459572	-0.00535754	0.00329592	0.00938745	0.00259895	0.0016776	-0.00241356	0.000133582	-0.000643817	-0.000368678	-0.0114581	-0.0158964	-0.00644602	0.00512201	0.00663052	-0.00752692	-0.0111338	-0.0116285
1	1	1	1	0.406109	0.948445	0.0456634	-0.019981	0.0564635	0.00637604	-0.0207441	0.00504258	0.0357203	-0.017536	0.0205927	-0.0307466	-0.01015	0.0206863	0.0372534	-0.00807748	0.00906426	-0.0246241	0.0252692	-0.00525629	-0.0114581	-0.0162634	-0.0141835	0.0122015	0.0145435	-0.0151015	-0.00603037	-0.0158395
1	1	1	1	0.406109	0.948445	0.0255897	-0.019981	0.0277054	0.00751234	-0.0207441	0.00171207	0.0254158	-0.017536	0.0156523	-0.0243702	-0.00897317	0.0147212	0.0277303	-0.00678033	0.00877761	-0.0205722	0.0207966	-0.00602967	-0.0114581	-0.0162634	-0.0145861	0.0104985	0.0136839	-0.015119	-0.00592254	-0.01534
1	1	1	1	0.406109	0.948445	0.00938433	-0.019981	0.0108902	0.000542903	-0.0207441	-0.00747169	0.0102491	-0.017536	0.0121142	-0.0140983	-0.011798	0.00347475	0.0181722	-0.00478568	0.00536267	-0.0134959	0.0114591	-0.0188057	-0.0114581	-0.0125035	-0.0115828	-0.000965864	0.00708588	-0.0130509	-0.00108225	-0.00291826
1	1	1	1	0.406109	0.948445	0.0464699	-0.019981	0.05891	0.00521673	-0.0207441	0.00322567	0.0353782	-0.017536	0.0217424	-0.0295931	-0.0109533	0.0193285	0.0369857	-0.00800523	0.00891233	-0.0247824	0.0276308	-0.015147	-0.0114581	-0.0162634	-0.0144094	0.0071854	0.0126868	-0.0158947	-0.00344611	-0.0100578
1	1	1	1	0.406109	0.948445	0.0202676	-0.019981	0.0163703	0.00889964	-0.0207441	0.0046799	0.0247687	-0.017536	0.012785	-0.0246663	-0.00567616	0.0175976	0.0253868	-0.00587647	0.00713284	-0.0172459	0.0276887	0.00257257	-0.0114581	-0.0162634	-0.0160255	0.0168258	0.017418	-0.0157654	-0.0115843	-0.0245679
1	1	1	1	0.406109	0.948445	0.0391047	-0.019981	0.0483617	0.00113149	-0.0207441	-0.00214424	0.0271638	-0.017536	0.0192158	-0.0254886	-0.0123709	0.0158737	0.0330865	-0.00637029	0.00568311	-0.0187417	0.0137452	-0.00545701	-0.0114581	-0.0162634	-0.0105183	0.00677663	0.0100672	-0.0117082	-0.00507312	-0.0108178
1	1	1	1	0.406109	0.948445	0.0477032	-0.019981	0.0471682	0.0201634	-0.0207441	0.0415274	0.053432	-0.017536	0.0120382	-0.0400233	-0.00839038	0.0273353	0.0428144	-0.0129127	0.0131093	-0.0295166	0.0523083	0.0438854	-0.0114581	-0.0162634	-0.0236563	0.0532223	0.036557	-0.0185512	-0.0237124	-0.0594316
1	1	1	1	0.406109	0.948445	-0.0154085	-0.019981	-0.0207151	0.0051791	-0.0207441	-0.00747169	0.010743	-0.017536	0.00771767	-0.018639	0.0054468	0.0206137	0.00646578	0.0030778	-0.0034053	-0.0034291	-0.0155344	0.0598231	-0.0114581	-0.0162634	-0.00569172	0.0355009	0.0175415	-0.00135197	-0.0388206	-0.0532498
1	1	1	1	0.406109	0.948445	0.0291713	-0.019981	-0.0207151	0.059532	0.0191372	0.149826	0.083862	-0.017536	-0.0546426	-0.0348656	-0.0589269	-0.0139371	0.0213402	-0.0502837	0.021134	-0.0486163	0.0957843	0.100909	-0.0114581	-0.0162634	-0.0448265	0.110745	0.0703051	-0.0280182	-0.0682569	-0.131191
1	1	1	1	0.406109	0.948445	0.0489446	-0.019981	0.0600526	0.00802365	-0.0207441	0.00683531	0.0389157	-0.017536	0.0211758	-0.032395	-0.00985675	0.0227406	0.0388228	-0.00878663	0.00979774	-0.0265915	0.0321986	-0.0115651	-0.0114581	-0.0162634	-0.0150465	0.010956	0.0148044	-0.0164289	-0.00473197	-0.0134878
1	1	1	1	0.406109	0.948445	-0.00312931	-0.019981	-0.00921285	0.000555369	-0.0207441	-0.00747169	0.00222736	-0.017536	0.00769599	-0.0108134	-0.00772473	0.00276709	0.0123173	-0.00322061	0.00390582	-0.00882317	0.0108466	-0.0166992	-0.0114581	-0.0136439	-0.0112164	-0.000395549	0.00722126	-0.0127833	-0.00229335	-0.00443782
1	1	1	1	0.406109	0.948445	0.0413331	-0.019981	0.0519129	0.00227787	-0.0207441	-0.002881	0.029464	-0.017536	0.0212668	-0.0259493	-0.0125834	0.0162409	0.0336606	-0.0071631	0.00706469	-0.022404	0.0166378	-0.0161349	-0.0114581	-0.0135252	-0.0121608	0.00255875	0.00904718	-0.0135138	-0.00192896	-0.00561127
1	1	1	1	0.406109	0.948445	0.0268901	-0.019981	0.0357063	-0.00101829	-0.0207441	-0.00734281	0.0169499	-0.017536	0.0159076	-0.0204309	-0.0117525	0.0115921	0.0264598	-0.00556913	0.00491423	-0.0146289	0.0131342	-0.019795	-0.0114581	-0.011437	-0.0113513	-0.00103543	0.00703737	-0.0129904	-0.000698823	-0.00217972
1	1	1	1	0.406109	0.948445	0.0423561	-0.019981	0.0526951	0.00313386	-0.0207441	-0.00170208	0.0308898	-0.017536	0.0213462	-0.0268835	-0.0119463	0.0173061	0.0344121	-0.00725552	0.00743356	-0.0228572	0.0184359	-0.0143767	-0.0114581	-0.0146901	-0.0125725	0.00427221	0.0100257	-0.0137796	-0.00260159	-0.00732373
1	1	1	1	0.406109	0.948445	0.0209608	-0.019981	0.0207248	0.00971917	-0.0207441	0.00439265	0.025162	-0.017536	0.0139241	-0.02359	-0.00806494	0.013653	0.0257606	-0.00704273	0.00930515	-0.0200037	0.0323182	-0.0179413	-0.0114581	-0.0162634	-0.0179519	0.00746265	0.014675	-0.0188332	-0.00541188	-0.0132502
1	1	1	1	0.406109	0.948445	-0.0208966	-0.0152973	-0.0207151	-0.00251641	-0.0207441	-0.00747169	-0.00912872	-0.017536	0.00109927	-0.00387994	-0.0115325	-0.00757554	0.00299587	-0.0026787	0.00196269	-0.00259171	0.0108695	-0.0227263	-0.0114581	-0.0113865	-0.0116835	-0.00352061	0.00606534	-0.0133445	-0.000187812	-0.000599565
1	1	1	1	0.406109	0.948445	0.0357232	-0.019981	0.0334261	0.0111204	-0.0207441	0.018749	0.0398063	-0.017536	0.014507	-0.034662	-0.0078497	0.0261242	0.035668	-0.00764899	0.00703932	-0.0208206	0.0255791	0.0516863	-0.0114581	-0.0162634	-0.0146568	0.0456209	0.0283859	-0.0111949	-0.0231353	-0.0531368
1	1	1	1	0.406109	0.948445	0.013224	-0.019981	-0.00432198	0.0063956	-0.0207441	0.00279392	0.0248468	-0.017536	0.0115637	-0.0270438	0.000472212	0.0265398	0.0228986	-0.00221421	0.000998165	-0.0114	0.021508	0.0475577	-0.0114581	-0.0162634	-0.0126198	0.0423097	0.0258447	-0.0099902	-0.0236933	-0.04928
1	1	1	1	0.406109	0.948445	0.0110647	-0.019981	-0.00498698	0.00485119	-0.0207441	-0.00416433	0.0191873	-0.017536	0.0111496	-0.0232094	0.00199914	0.0242952	0.0202017	-0.00183167	0.000854584	-0.00998407	0.0298995	0.0140348	-0.0114581	-0.0162634	-0.0138099	0.0250548	0.0198825	-0.0136536	-0.0153818	-0.0302488
1	1	1	1	0.406109	0.948445	0.0100231	-0.019981	-0.0207151	0.0142613	-0.0207441	0.0222423	0.0369981	-0.017536	0.00816858	-0.0302937	0.00307097	0.0312236	0.0236586	-0.00447714	-0.000112216	-0.0138264	0.0517552	0.0437644	-0.0114581	-0.0162634	-0.0246854	0.0538031	0.0372406	-0.0191924	-0.02785	-0.0623834
1	1	1	1	0.406109	0.948445	0.0305876	-0.019981	0.039966	0.000612839	-0.0207441	-0.00489765	0.0211953	-0.017536	0.0171737	-0.0221048	-0.0112555	0.0128395	0.0281125	-0.00611767	0.00576972	-0.0173554	0.0168443	-0.0198518	-0.0114581	-0.0124124	-0.0120597	0.000295976	0.00815754	-0.0138073	-0.00115393	-0.00342121
1	1	1	1	0.406109	0.948445	0.0234484	-0.019981	0.0184832	0.00945589	-0.0207441	0.00425006	0.0277373	-0.017536	0.012702	-0.027879	-0.00275939	0.0236306	0.0263774	-0.00495278	0.00621037	-0.0172353	0.0179957	0.0301615	-0.0114581	-0.0162634	-0.0118887	0.0300624	0.0204985	-0.0107102	-0.0165928	-0.0360604
1	1	1	1	0.406109	0.948445	0.027096	-0.019981	0.0355611	0.00354357	-0.0207441	-0.00191083	0.0216808	-0.017536	0.0159725	-0.0220032	-0.00841688	0.0124688	0.0263869	-0.0058018	0.00797799	-0.0187593	0.0201424	-0.0164536	-0.0114581	-0.0149799	-0.0125202	0.00315343	0.00979616	-0.0141777	-0.00271007	-0.00662615
1	1	1	1	0.406109	0.948445	0.0242852	-0.019981	0.0238683	0.00602504	-0.0207441	-0.000121488	0.023723	-0.017536	0.0144822	-0.0242642	-0.00802315	0.0168357	0.0268047	-0.00567582	0.00643825	-0.0174278	0.0156334	0.00876071	-0.0114581	-0.0162634	-0.011333	0.0156948	0.0143681	-0.0119142	-0.00979684	-0.0215641
1	1	1	1	0.406109	0.948445	0.0113478	-0.019981	0.0110507	0.00151394	-0.0207441	-0.00747169	0.0111375	-0.017536	0.0121374	-0.015402	-0.0108067	0.00620225	0.0194136	-0.00508602	0.00556463	-0.0143027	0.0100706	-0.0174376	-0.0114581	-0.0132261	-0.01127	-0.000912713	0.00691248	-0.0126382	-0.00164237	-0.00352204
1	1	1	1	0.406109	0.948445	-0.0162552	-0.0170639	-0.0207151	-0.00112293	-0.0207441	-0.00747169	-0.00471208	-0.017536	0.00350217	-0.00532287	-0.0120931	-0.00675297	0.00558619	-0.00312311	0.00284246	-0.00531108	0.0122152	-0.0219746	-0.0114581	-0.0123325	-0.012291	-0.00246032	0.00682657	-0.0137736	-0.000655734	-0.00183078
1	1	1	1	0.406109	0.948445	0.0183326	-0.019981	0.020177	0.000902771	-0.0207441	-0.00607379	0.0146309	-0.017536	0.0136319	-0.0179235	-0.0112113	0.00832126	0.0231979	-0.00518224	0.00537074	-0.0143215	0.0127119	-0.0148488	-0.0114581	-0.0145147	-0.0112045	0.00119463	0.0079856	-0.0126747	-0.00274493	-0.00558012
1	1	1	1	0.406109	0.948445	0.0484368	-0.019981	0.0459311	0.0188797	-0.0207441	0.045946	0.0547103	-0.017536	0.0112704	-0.0392	-0.0113795	0.0256777	0.0445749	-0.0139769	0.011825	-0.0288796	0.0550847	0.0446064	-0.0114581	-0.0162634	-0.0244599	0.0545518	0.0376171	-0.0191219	-0.0246276	-0.0613016
1	1	1	1	0.406109	0.948445	0.0134139	-0.019981	0.0188925	0.000929119	-0.0207441	-0.00558378	0.0117225	-0.017536	0.0120063	-0.0159533	-0.00994446	0.00546263	0.0196478	-0.00495837	0.00613973	-0.0139257	0.0138451	-0.0195161	-0.0114581	-0.0127282	-0.0116665	-0.000828411	0.00738401	-0.0133358	-0.00131054	-0.00304716
1	1	1	1	0.406109	0.948445	0.00527024	-0.019981	0.00533799	-0.000236526	-0.0207441	-0.00747169	0.0058463	-0.017536	0.00977048	-0.0133386	-0.0104024	0.00408442	0.0165212	-0.0041782	0.00475774	-0.010652	0.011531	-0.0197065	-0.0114581	-0.0124837	-0.0115422	-0.00157971	0.00687295	-0.0131899	-0.00112602	-0.00261433
1	1	1	1	0.406109	0.948445	0.0258603	-0.019981	0.0109739	0.019472	-0.0207441	0.0316403	0.042936	-0.017536	0.0081572	-0.0352721	-0.00405799	0.0272072	0.030802	-0.00856921	0.00878478	-0.0218713	0.0355686	0.0620387	-0.0114581	-0.0162634	-0.0202034	0.0577368	0.0360511	-0.0144275	-0.0291648	-0.0668166
1	1	1	1	0.406109	0.948445	0.0268901	-0.019981	0.0357063	-0.00101829	-0.0207441	-0.00734281	0.0169499	-0.017536	0.0159076	-0.0204309	-0.0117525	0.0115921	0.0264598	-0.00556913	0.00491423	-0.0146289	0.0131342	-0.019795	-0.0114581	-0.011437	-0.0113513	-0.00103543	0.00703737	-0.0129904	-0.000698823	-0.00217972
1	1	1	1	0.406109	0.948445	0.00388539	-0.019981	-0.0207151	0.000696382	-0.0207441	0.0224291	0.0292912	-0.017536	0.00653898	-0.0247182	4.72096e-05	0.0239757	0.018766	0.000118898	-0.00923814	-0.00842621	-0.0180287	0.0895633	-0.0114581	-0.0162634	-0.00326592	0.0533541	0.0227008	0.00534174	-0.0624498	-0.0763211
1	1	1	1	0.406109	0.948445	-0.0126284	-0.011059	-0.0207151	0.000526788	-0.0207441	-0.00747169	-0.00381369	-0.017536	0.00582813	-0.00733139	-0.00105296	0.0080454	0.00631391	-0.000612903	0.000241996	-0.0044531	0.00238171	-0.00747978	-0.0114581	-0.0135539	-0.00797073	0.00229288	0.00628121	-0.0091359	-0.00617654	-0.00716597
1	1	1	1	0.406109	0.948445	0.0268901	-0.019981	0.0357063	-0.00101829	-0.0207441	-0.00734281	0.0169499	-0.017536	0.0159076	-0.0204309	-0.0117525	0.0115921	0.0264598	-0.00556913	0.00491423	-0.0146289	0.0131342	-0.019795	-0.0114581	-0.011437	-0.0113513	-0.00103543	0.00703737	-0.0129904	-0.000698823	-0.00217972
1	0	0	1	0.406109	0.948445	-0.0227141	-0.0132377	-0.0207151	-0.00390269	-0.0143746	-0.00747169	-0.0162207	-0.017536	-0.00274768	-0.001137	-0.0109334	-0.0103566	-0.00168258	-0.00168064	0.000992691	0.00184392	0.0116684	-0.024553	-0.0114581	-0.0109003	-0.0119864	-0.00426179	0.00596205	-0.013801	-8.36205e-05	-6.15137e-05
1	1	1	1	0.406109	0.948445	-0.0227141	-0.0150483	-0.0207151	-0.00335757	-0.0203078	-0.00747169	-0.0127927	-0.017536	-0.00098302	-0.00306846	-0.0111762	-0.0085509	0.00108275	-0.00209011	0.00160097	0.000107337	0.0122572	-0.0243258	-0.0114581	-0.0112246	-0.0120639	-0.00393754	0.00617831	-0.0138927	-0.000158988	-0.00034125
1	1	1	1	0.406109	0.948445	0.0379238	-0.019981	0.0206892	0.0200479	-0.0207441	0.0542595	0.0543425	-0.017536	0.0059353	-0.03882	-0.00981929	0.0274799	0.0405858	-0.0133459	0.00868496	-0.0257978	0.0482344	0.0812126	-0.0114581	-0.0162634	-0.0240178	0.0742014	0.0451721	-0.0162761	-0.0358284	-0.08427
1	1	1	1	0.406109	0.948445	-0.0181661	-0.0112836	-0.0207151	0.0005843	-0.0207441	-0.00747169	-0.00799741	-0.017536	0.000776459	-0.0052732	-0.00309071	0.00226076	0.00223399	-0.00184484	0.00113157	-0.00320169	0.00915277	-0.0206426	-0.0114581	-0.0103379	-0.0102753	-0.00306044	0.00552229	-0.0119901	-0.00167074	-0.000944101
1	1	1	1	0.406109	0.948445	0.0394736	-0.019981	0.0369049	0.014603	-0.0207441	0.0283112	0.0449063	-0.017536	0.0131967	-0.0366122	-0.00818106	0.0266144	0.0382508	-0.00961141	0.00899565	-0.0236508	0.0367603	0.0483938	-0.0114581	-0.0162634	-0.0183029	0.0486397	0.0318628	-0.0145761	-0.0236499	-0.0560238
1	1	1	1	0.406109	0.948445	-0.0141239	-0.0173144	-0.0171593	-0.00130719	-0.0207441	-0.00747169	-0.00379319	-0.017536	0.00386665	-0.00619767	-0.0119349	-0.00564811	0.00633444	-0.00333499	0.00289316	-0.00583301	0.0117074	-0.0222796	-0.0114581	-0.0117129	-0.0119117	-0.00290366	0.00646454	-0.0135208	-0.00038405	-0.00118597
1	0	0	0	0.406109	0.948445	-0.0227141	0.00186207	-0.0207151	-0.00318436	0.0167739	-0.00747169	-0.0265393	0.00405305	-0.0124729	0.00927265	-0.00125489	-0.00897908	-0.017621	0.00186527	-0.00423569	0.0115449	0.00332029	-0.0219238	-0.0114581	-0.0085698	-0.00922717	-0.00560872	0.00359113	-0.0108808	-0.00157613	0.00123461
1	1	1	1	0.406109	0.948445	0.0311197	-0.019981	0.0394176	0.000723119	-0.0207441	-0.00572968	0.0220852	-0.017536	0.01801	-0.0216666	-0.0121332	0.0123119	0.0281269	-0.00635708	0.00553018	-0.0184144	0.014413	-0.0192841	-0.0114581	-0.0119318	-0.0116125	-0.000271754	0.00753396	-0.0131951	-0.000969874	-0.00289632
1	1	1	1	0.406109	0.948445	0.0118128	-0.019981	-0.0207151	0.0228463	-0.0207441	0.0437228	0.0452903	-0.017536	0.00112157	-0.0331114	-0.00183221	0.0280255	0.024452	-0.00863196	0.00390902	-0.0185682	0.0482573	0.0684007	-0.0114581	-0.0162634	-0.024661	0.0676271	0.0423011	-0.0163877	-0.0387557	-0.0795278
1	1	1	1	0.406109	0.948445	0.0316721	-0.019981	0.0338261	0.0104534	-0.0207441	0.0118325	0.0332175	-0.017536	0.0142632	-0.0308981	-0.0062744	0.022368	0.0316879	-0.00695297	0.00869853	-0.0204376	0.0313123	0.0216042	-0.0114581	-0.0162634	-0.0140546	0.0293469	0.0220303	-0.0135606	-0.01442	-0.0341714
1	0	1	1	0.406109	0.948445	-0.0227141	0.000854599	-0.0207151	-0.00473109	0.0128242	-0.00747169	-0.0265393	-0.0091971	-0.00795116	0.0103269	0.00778716	-0.00436824	-0.0168222	0.0042386	-0.00549469	0.0122241	0.00592279	-0.0205559	-0.0114581	-0.00882153	-0.00927327	-0.00335634	0.00466273	-0.0110126	-0.00293326	-0.000430748
1	1	1	1	0.406109	0.948445	0.0426115	-0.019981	0.0556108	0.00323661	-0.0207441	0.00156614	0.0305561	-0.017536	0.019825	-0.0276942	-0.010271	0.0175969	0.0345509	-0.00692137	0.00789436	-0.0214956	0.0224717	-0.0106542	-0.0114581	-0.0162634	-0.012198	0.00734602	0.0115587	-0.0138496	-0.00406129	-0.0102008
1	1	1	1	0.406109	0.948445	0.0255257	-0.019981	0.0224461	0.0108112	-0.0207441	0.011235	0.0316448	-0.017536	0.0129587	-0.0298828	-0.00498334	0.022286	0.0288534	-0.00608992	0.00772617	-0.0187337	0.0252835	0.0322426	-0.0114581	-0.0162634	-0.01483	0.0338981	0.0236585	-0.0128102	-0.0179637	-0.0411017
1	1	1	1	0.406109	0.948445	0.0389848	-0.019981	0.048968	0.00158909	-0.0207441	-0.00427352	0.0275111	-0.017536	0.0205892	-0.0248508	-0.0125451	0.0154629	0.0321876	-0.0068808	0.00647114	-0.0213874	0.0154537	-0.0169671	-0.0114581	-0.0126497	-0.0116491	0.00149323	0.00832597	-0.0131167	-0.00151265	-0.00443384
1	1	1	1	0.406109	0.948445	0.0286648	-0.019981	0.0327713	0.00755713	-0.0207441	0.00128659	0.0273792	-0.017536	0.0165669	-0.0254793	-0.00886727	0.0158373	0.0287211	-0.00696187	0.00912534	-0.0221216	0.0224526	-0.00766424	-0.0114581	-0.0162634	-0.0148753	0.0101245	0.0136232	-0.0151344	-0.00537457	-0.0144392
1	1	1	1	0.406109	0.948445	0.00486531	-0.019981	0.00338321	0.000888668	-0.0207441	-0.00747169	0.007303	-0.017536	0.0102149	-0.0130833	-0.0105003	0.00296583	0.0164841	-0.00437525	0.00505209	-0.0117328	0.010631	-0.0170052	-0.0114581	-0.0138373	-0.0114623	-0.000543226	0.00720452	-0.0128129	-0.00193885	-0.00409126
1	1	1	1	0.406109	0.948445	0.0237114	-0.019981	0.0277719	0.00424797	-0.0207441	-0.00283481	0.0212496	-0.017536	0.0159107	-0.0213855	-0.0104101	0.0110297	0.0261066	-0.00617382	0.00785536	-0.0190934	0.0161113	-0.0128114	-0.0114581	-0.0162634	-0.0127541	0.00439497	0.0100608	-0.0137706	-0.00307503	-0.00834137
1	1	1	1	0.406109	0.948445	0.0112738	-0.019981	-0.00464216	0.0038978	-0.0207441	-0.00242507	0.0201998	-0.017536	0.0115272	-0.0242679	-0.000347168	0.0240508	0.0208187	-0.00146219	0.000228622	-0.00984878	0.00871892	0.046013	-0.0114581	-0.0162634	-0.00903107	0.0360341	0.0208069	-0.00651307	-0.0239826	-0.0440379
1	1	1	1	0.406109	0.948445	0.026956	-0.019981	0.0319316	0.00555293	-0.0207441	-0.00102435	0.0241957	-0.017536	0.0163734	-0.023342	-0.00875427	0.0139878	0.0272876	-0.0063497	0.00843005	-0.0203552	0.0242782	-0.0162012	-0.0114581	-0.0162634	-0.0141152	0.00515997	0.0114787	-0.0153714	-0.0032206	-0.00876259
1	1	1	1	0.406109	0.948445	-0.00581011	-0.019981	-0.0207151	0.00120631	-0.0207441	-0.00747169	0.00693742	-0.017536	0.00984342	-0.0157049	0.00861776	0.0227573	0.0102297	0.00224186	-0.00314493	-0.00447477	0.00652332	0.0226399	-0.0114581	-0.0162634	-0.00610124	0.0234526	0.0139599	-0.00567602	-0.0189074	-0.0269985
1	1	1	1	0.406109	0.948445	-0.00913646	-0.0139739	-0.0204759	0.00126951	-0.0207441	-0.00747169	-0.0013423	-0.017536	0.00532556	-0.00791578	-0.00563531	0.00378389	0.00783936	-0.00251991	0.00229823	-0.00660758	0.00844697	-0.0183525	-0.0114581	-0.0120012	-0.0105127	-0.00197212	0.00605389	-0.0120861	-0.00222768	-0.00253954
1	1	1	1	0.406109	0.948445	0.0157786	-0.019981	0.0215429	0.000570527	-0.0207441	-0.00535624	0.0124248	-0.017536	0.0126886	-0.016478	-0.0102994	0.00595322	0.0210828	-0.00502716	0.0060847	-0.0138768	0.0118181	-0.0168157	-0.0114581	-0.0129471	-0.0109308	-0.000108359	0.00726054	-0.0125824	-0.00171826	-0.00377737
1	1	1	1	0.406109	0.948445	0.0305307	-0.019981	0.0281912	0.00518728	-0.0207441	-0.00747169	0.0245175	-0.017536	0.0168208	-0.0237741	-0.00578598	0.0218447	0.0273601	-0.00559903	0.00483218	-0.0190948	0.0144506	-0.00807581	-0.0114581	-0.0149473	-0.0108402	0.00662563	0.00993606	-0.0118224	-0.00467187	-0.00957153
1	1	1	1	0.406109	0.948445	-0.0135617	-0.0173511	-0.0166957	-0.000843647	-0.0207441	-0.00747169	-0.00288128	-0.017536	0.00423509	-0.00626523	-0.0117702	-0.00539694	0.00641546	-0.00330553	0.00290862	-0.00624644	0.013156	-0.0229649	-0.0114581	-0.0119372	-0.0122657	-0.00278333	0.00675397	-0.01389	-0.000442774	-0.00132283
1	1	1	1	0.406109	0.948445	0.0469449	-0.019981	0.0582118	0.00585843	-0.0207441	0.00227642	0.0353227	-0.017536	0.0209518	-0.0305957	-0.00994681	0.0217208	0.0369977	-0.00799206	0.00865513	-0.0250004	0.0213874	-0.00768647	-0.0114581	-0.0162634	-0.0129643	0.0091296	0.0124244	-0.0139291	-0.00486516	-0.0124769
1	1	1	1	0.406109	0.948445	0.00514992	-0.019981	0.00586743	-0.000279913	-0.0207441	-0.00747169	0.00571347	-0.017536	0.00953821	-0.0133306	-0.0109756	0.00375384	0.0164079	-0.00442983	0.00477168	-0.0107179	0.0101373	-0.0192808	-0.0114581	-0.0121564	-0.0111811	-0.00187262	0.00648611	-0.0127425	-0.00092137	-0.00218868
1	1	1	1	0.406109	0.948445	0.0106638	-0.019981	-0.0207151	0.0193954	-0.0207441	0.0497153	0.0466665	-0.017536	-0.000593877	-0.0322811	-0.00553598	0.0258089	0.0245571	-0.0088542	0.000759776	-0.0187101	0.0124898	0.11525	-0.0114581	-0.0162634	-0.0169334	0.0814922	0.0419971	-0.00499953	-0.0576021	-0.101644
1	1	1	1	0.406109	0.948445	0.0466788	-0.019981	0.0576189	0.00511803	-0.0207441	0.00560521	0.0356088	-0.017536	0.0204074	-0.0305699	-0.0124524	0.0197631	0.0382488	-0.00826981	0.00793418	-0.0231927	0.029029	-0.00967196	-0.0114581	-0.0162634	-0.0137442	0.0103909	0.0139152	-0.0153284	-0.00507357	-0.0133252
1	1	1	1	0.406109	0.948445	0.0161232	-0.019981	0.00414959	0.00344489	-0.0207441	-0.00747169	0.0183066	-0.017536	0.0129009	-0.0221865	-0.00286858	0.0218269	0.0217366	-0.00268036	0.00137892	-0.0118525	0.0126864	0.0195962	-0.0114581	-0.0162634	-0.00888794	0.0212863	0.0151053	-0.00866361	-0.013205	-0.0257696
1	1	1	1	0.406109	0.948445	-0.0227141	-0.0106361	-0.0207151	-0.0017203	-0.0207441	-0.00747169	-0.00989859	-0.017536	0.00433592	-0.00451405	0.00556039	0.00992619	0.00137514	0.00249607	-0.00307904	0.00113156	0.00420485	0.000120499	-0.0114581	-0.0158168	-0.00811276	0.00779395	0.00858854	-0.00867843	-0.00935658	-0.0127827
1	1	1	1	0.406109	0.948445	-0.0126089	-0.0176097	-0.0143903	-0.00105667	-0.0207441	-0.00747169	-0.00340838	-0.017536	0.00361441	-0.00743883	-0.0104491	-0.00314037	0.00662136	-0.00319239	0.0029431	-0.00593671	0.0141416	-0.0237582	-0.0114581	-0.0117813	-0.0122199	-0.00303872	0.00672385	-0.0139813	-0.000377465	-0.00101448
1	1	1	1	0.406109	0.948445	0.0384574	-0.019981	0.0382434	0.0119865	-0.0207441	0.0260614	0.04299	-0.017536	0.0136465	-0.0369562	-0.0078603	0.0265396	0.0376611	-0.00817048	0.00822041	-0.021757	0.0336867	0.0583381	-0.0114581	-0.0162634	-0.0165396	0.0531891	0.0325669	-0.0120564	-0.0252628	-0.0596981
1	1	1	1	0.406109	0.948445	0.0481774	-0.019981	0.0450636	0.0195803	-0.0207441	0.0493621	0.0557416	-0.017536	0.0099602	-0.0402933	-0.00997993	0.027144	0.0446414	-0.0137767	0.0117018	-0.0281086	0.0622659	0.0429971	-0.0114581	-0.0162634	-0.0251559	0.0563743	0.0390008	-0.019956	-0.0242366	-0.0613232
1	1	1	1	0.406109	0.948445	-0.0227141	-0.00472472	-0.0207151	-0.00455899	-0.0138001	-0.00747169	-0.0186973	-0.017536	0.00182188	0.00121022	0.00674935	0.00542449	-0.00376245	0.00355445	-0.00459129	0.00507271	-0.00120764	-0.00799731	-0.0114581	-0.0109875	-0.00601282	0.00132052	0.00467199	-0.00734374	-0.00958607	-0.00652312
1	1	1	1	0.406109	0.948445	0.0437106	-0.019981	0.0429024	0.015047	-0.0207441	0.0320323	0.0487018	-0.017536	0.0139944	-0.0384955	-0.00949789	0.0267817	0.0410993	-0.0105616	0.00981573	-0.0256281	0.0296808	0.0652992	-0.0114581	-0.0162634	-0.018907	0.0570635	0.0346948	-0.0124123	-0.0274288	-0.0653882
1	1	1	1	0.406109	0.948445	0.0486726	-0.019981	0.058741	0.00735627	-0.0207441	0.010378	0.0402008	-0.017536	0.0204369	-0.0329786	-0.0117926	0.0218937	0.0398936	-0.00859969	0.00861054	-0.0242487	0.0285806	0.00666874	-0.0114581	-0.0162634	-0.0146942	0.0206124	0.0182622	-0.0145471	-0.00893508	-0.0237402
1	1	1	1	0.406109	0.948445	0.0457593	-0.019981	0.0576741	0.00323116	-0.0207441	-0.000307599	0.0328124	-0.017536	0.022125	-0.0280521	-0.0123167	0.0181325	0.036243	-0.00751845	0.0077014	-0.0234437	0.0185947	-0.0120049	-0.0114581	-0.0154269	-0.0120917	0.00557754	0.0104288	-0.0134668	-0.00303361	-0.00844974
1	1	1	1	0.406109	0.948445	0.0466928	-0.019981	0.0589758	0.00711561	-0.0207441	0.0079018	0.0372434	-0.017536	0.0199152	-0.0322381	-0.00865185	0.0220001	0.0375716	-0.00795851	0.00977989	-0.0249218	0.0340034	-0.00757227	-0.0114581	-0.0162634	-0.0151124	0.0138714	0.0160721	-0.0161695	-0.00592271	-0.0161545
1	1	1	1	0.406109	0.948445	0.0428784	-0.019981	0.0498899	0.00958597	-0.0207441	0.0109276	0.0384418	-0.017536	0.0174906	-0.0337468	-0.00495493	0.0254592	0.0363359	-0.00742309	0.00934618	-0.0237843	0.0352495	0.0117374	-0.0114581	-0.0162634	-0.0153954	0.0258834	0.0210182	-0.0147652	-0.0112131	-0.028752
1	1	1	1	0.406109	0.948445	0.0327459	-0.019981	0.0241614	0.0195439	-0.0207441	0.0330436	0.0460416	-0.017536	0.0104133	-0.0367457	-0.00749674	0.0254379	0.035164	-0.0102791	0.0109397	-0.0250098	0.0277089	0.0716941	-0.0114581	-0.0162634	-0.0194533	0.0599343	0.036106	-0.0124839	-0.0303035	-0.070692
1	1	1	1	0.406109	0.948445	0.00161872	-0.019981	-0.0207151	0.0124471	-0.0207441	0.0185646	0.0305956	-0.017536	0.00675973	-0.0290997	0.00222575	0.0270341	0.0177863	-0.00188607	7.75365e-05	-0.0115786	0.00179904	0.0935254	-0.0114581	-0.0162634	-0.0123914	0.0630842	0.0326287	-0.00438743	-0.0471582	-0.0814254
1	1	1	1	0.406109	0.948445	0.0432126	-0.019981	0.0545145	0.00235498	-0.0207441	-0.00282164	0.0305736	-0.017536	0.0217974	-0.0266603	-0.0124206	0.0169248	0.0345629	-0.00718851	0.00731479	-0.0229512	0.0164904	-0.0146765	-0.0114581	-0.0135057	-0.0117097	0.00329186	0.00913683	-0.0131041	-0.00203129	-0.00598666
1	0	0	0	0.406109	0.948445	-0.0227141	-0.0027555	-0.0207151	-0.00390367	0.00574234	-0.00747169	-0.0265393	-0.00518982	-0.00870834	0.0059937	-0.00421604	-0.0095319	-0.0119331	0.000997592	-0.00266164	0.00846025	0.00346441	-0.0219323	-0.0114581	-0.00902368	-0.00948636	-0.00617881	0.00348995	-0.0110544	-0.00165508	0.000868304
1	1	1	1	0.406109	0.948445	0.0453353	-0.019981	0.0554578	0.00538458	-0.0207441	0.00647466	0.0356768	-0.017536	0.0192303	-0.0318691	-0.0115469	0.021553	0.037662	-0.00758372	0.00750257	-0.0222322	0.0214977	0.0133922	-0.0114581	-0.0162634	-0.0113983	0.0210819	0.0168455	-0.0118532	-0.00986886	-0.0243741
1	1	1	1	0.406109	0.948445	0.0466243	-0.019981	0.0578828	0.00796581	-0.0207441	0.00912132	0.0376824	-0.017536	0.0194095	-0.0324879	-0.00845637	0.0227516	0.037877	-0.0083206	0.0098509	-0.0250978	0.0332832	-0.00327541	-0.0114581	-0.0162634	-0.0154402	0.0162048	0.0171998	-0.0162496	-0.00735982	-0.0193756
1	0	0	0	0.406109	0.948445	-0.0227141	0.017844	-0.0207151	-0.0118328	0.0542959	-0.00747169	-0.0265393	0.0310058	-0.020837	0.0286994	0.0102645	-0.0197531	-0.0376834	0.00965593	-0.0118702	0.0292399	-0.022047	-0.0191605	-0.00582162	0.00170692	-0.00077576	-0.0119547	-0.00461339	-0.00221168	-0.00878975	0.00596445
1	1	1	1	0.406109	0.948445	0.0172483	-0.019981	-0.00728697	0.0154668	-0.0207441	0.0193979	0.0346675	-0.017536	0.00859851	-0.0286848	0.00106115	0.0271312	0.0243489	-0.00568896	0.00387743	-0.0175151	0.029037	0.0330026	-0.0114581	-0.0162634	-0.0188883	0.0379561	0.0268949	-0.0149978	-0.0278824	-0.0499107
1	1	1	1	0.406109	0.948445	0.0230438	-0.019981	-0.00193043	0.0156137	-0.0207441	0.0358586	0.0430944	-0.017536	0.00799753	-0.0327108	-0.0039593	0.0276166	0.0308198	-0.00840123	0.00384024	-0.0192252	0.0470459	0.0518264	-0.0114581	-0.0162634	-0.0249021	0.0568493	0.0379569	-0.0177961	-0.0315077	-0.0675333
1	0	0	0	0.406109	0.948445	-0.0227141	-0.00368152	-0.0207151	-0.00302056	0.00581178	-0.00747169	-0.0265393	-0.00432327	-0.00943778	0.00514645	-0.00464795	-0.00891735	-0.0118375	0.000364784	-0.00231153	0.00775599	0.00644802	-0.0224961	-0.0114581	-0.0096487	-0.0102843	-0.00489204	0.00457383	-0.0119282	-0.000848255	0.000654859
1	1	1	1	0.406109	0.948445	-0.00837586	-0.018837	-0.011046	-0.000607655	-0.0207441	-0.00747169	-0.000175009	-0.017536	0.00638109	-0.00805943	-0.0107924	-0.00272207	0.00896836	-0.00327022	0.00369741	-0.00788346	0.014146	-0.0226795	-0.0114581	-0.0122736	-0.0125546	-0.00223623	0.00713863	-0.0140918	-0.000756236	-0.00192222
1	1	1	1	0.406109	0.948445	0.0105014	-0.019981	-0.0140161	0.00906421	-0.0207441	0.00819618	0.0286599	-0.017536	0.0100546	-0.0290408	0.00105722	0.0295673	0.0223481	-0.00223462	-8.63393e-05	-0.0111712	0.0162783	0.0685042	-0.0114581	-0.0162634	-0.0127995	0.0533211	0.030108	-0.00831733	-0.0304046	-0.0626227
1	1	1	1	0.406109	0.948445	0.0143307	-0.019981	0.0134115	0.00197871	-0.0207441	-0.00747169	0.0126805	-0.017536	0.0129385	-0.017461	-0.00530216	0.0110037	0.0204139	-0.00382552	0.00574769	-0.0140271	0.0142194	-0.0127228	-0.0114581	-0.0154425	-0.011284	0.00280945	0.00876699	-0.012772	-0.00399967	-0.0076618
1	1	1	1	0.406109	0.948445	0.0400384	-0.019981	0.0481448	0.00440561	-0.0207441	0.00394198	0.0316042	-0.017536	0.0178041	-0.0297506	-0.0102637	0.020514	0.0346604	-0.00673223	0.00663515	-0.0200206	0.0214299	0.0110944	-0.0114581	-0.0162634	-0.0112839	0.0190237	0.0160257	-0.011868	-0.0101633	-0.0231921
1	1	1	1	0.406109	0.948445	0.0274537	-0.019981	0.0310947	0.0053882	-0.0207441	0.0010787	0.0246588	-0.017536	0.0147527	-0.0253614	-0.00790769	0.0169642	0.0280943	-0.0057833	0.00704389	-0.0178639	0.0183224	0.0078505	-0.0114581	-0.0162634	-0.0113648	0.0159932	0.0146558	-0.0120194	-0.00947376	-0.0210481
1	1	1	1	0.406109	0.948445	0.00339194	-0.019981	0.00107415	0.00184169	-0.0207441	-0.00681018	0.00819302	-0.017536	0.0101501	-0.0129175	-0.0112495	0.00212289	0.0159838	-0.00447313	0.00532565	-0.0120834	0.0134805	-0.0174326	-0.0114581	-0.0149413	-0.0128033	0.00063435	0.00838455	-0.0138502	-0.0022727	-0.00540438
1	1	1	1	0.406109	0.948445	0.0271627	-0.019981	0.0356212	-0.000182508	-0.0207441	-0.00643649	0.0184461	-0.017536	0.0161241	-0.0205759	-0.0112839	0.0115593	0.0261587	-0.00578166	0.00510434	-0.0159736	0.0148322	-0.0199257	-0.0114581	-0.0117504	-0.0115936	-0.00054306	0.00746134	-0.01329	-0.000905222	-0.00261874
1	1	1	1	0.406109	0.948445	0.0512996	-0.019981	0.0639795	0.00804055	-0.0207441	0.0137326	0.0417242	-0.017536	0.0196763	-0.0350211	-0.0112346	0.0235164	0.0412915	-0.00900161	0.00937936	-0.0251742	0.0327708	0.00803565	-0.0114581	-0.0162634	-0.0144891	0.022499	0.0193246	-0.014685	-0.00984818	-0.0252901
1	1	1	1	0.406109	0.948445	0.043012	-0.019981	-0.0207151	0.0698331	0.0222101	0.16304	0.0811909	-0.017536	-0.0655437	-0.0300422	-0.0755182	-0.0340874	0.0242922	-0.0614347	0.0356227	-0.0607488	0.0782703	0.113255	-0.0114581	-0.0162634	-0.0401374	0.109096	0.066665	-0.0224884	-0.0742663	-0.134957
1	1	1	1	0.406109	0.948445	0.0107098	-0.019981	-0.0180308	0.00897246	-0.0207441	0.0186037	0.0325103	-0.017536	0.00883227	-0.0299214	0.000513886	0.029005	0.0236139	-0.00274473	-0.00108588	-0.0116299	0.0184596	0.0768942	-0.0114581	-0.0162634	-0.0131613	0.0596958	0.032755	-0.00767605	-0.0380105	-0.0711192
1	1	1	1	0.406109	0.948445	-0.000999173	-0.019981	0.003057	-0.000929481	-0.0207441	-0.00701418	0.00192666	-0.017536	0.00635211	-0.01102	-0.00943794	0.000187627	0.0118537	-0.00400687	0.00425891	-0.00858003	0.0118085	-0.0208369	-0.0114581	-0.0116017	-0.0112536	-0.00233324	0.00645762	-0.0130006	-0.00071577	-0.00152587
1	1	1	1	0.406109	0.948445	0.0226264	-0.019981	0.025973	0.003861	-0.0207441	-0.00446049	0.019356	-0.017536	0.0149088	-0.0208521	-0.0089161	0.0125899	0.0247458	-0.00581928	0.00712235	-0.0180072	0.0151172	-0.0133865	-0.0114581	-0.0159076	-0.0118419	0.00322237	0.00926951	-0.01336	-0.0030959	-0.00741319
1	1	1	1	0.406109	0.948445	0.000196658	-0.019981	-0.0207151	0.0112767	-0.0207441	0.00271109	0.0221101	-0.017536	0.00819984	-0.0240329	0.00348796	0.0243521	0.0147347	-0.0012779	0.00117428	-0.0106472	0.00384153	0.0515769	-0.0114581	-0.0162634	-0.0122507	0.0384815	0.0226507	-0.00722873	-0.0327206	-0.0528664
1	1	1	1	0.406109	0.948445	0.0388811	-0.019981	0.0374859	0.0133308	-0.0207441	0.012033	0.0384891	-0.017536	0.016535	-0.0308305	-0.00490127	0.025551	0.0342945	-0.00872723	0.00898096	-0.0245252	0.0459271	-0.0129535	-0.0114581	-0.0162634	-0.0200441	0.0155786	0.0196467	-0.0204208	-0.00831801	-0.0200275
1	1	1	1	0.406109	0.948445	0.027208	-0.019981	0.0314862	0.00606862	-0.0207441	0.000821316	0.0247698	-0.017536	0.0160306	-0.024177	-0.00927006	0.0143391	0.0282536	-0.00653853	0.00838736	-0.0199728	0.0188773	-0.00509106	-0.0114581	-0.0162634	-0.0129826	0.00973727	0.012657	-0.0139139	-0.00566525	-0.0141762
1	1	1	1	0.406109	0.948445	0.0118299	-0.019981	0.00338831	0.00436703	-0.0207441	-0.00747169	0.0145176	-0.017536	0.0110312	-0.0192945	-0.00380966	0.0166148	0.019394	-0.00339232	0.00357151	-0.0121401	0.01085	0.00874313	-0.0114581	-0.0162634	-0.00921151	0.0142041	0.0124769	-0.00997777	-0.0106798	-0.0195104
1	1	1	1	0.406109	0.948445	0.0167289	-0.019981	0.00888507	0.00845199	-0.0207441	-0.00573229	0.0197921	-0.017536	0.0120817	-0.0223409	0.000962108	0.0222366	0.0205636	-0.00391908	0.00578935	-0.0162324	0.0237433	-0.00222405	-0.0114581	-0.0162634	-0.0127868	0.0134561	0.0142627	-0.0134732	-0.00835853	-0.0170385
1	1	1	1	0.406109	0.948445	0.040492	-0.019981	0.050512	0.00292731	-0.0207441	-0.00189702	0.0291987	-0.017536	0.0205071	-0.0258824	-0.0108605	0.0170049	0.0331451	-0.00683616	0.00720736	-0.0218312	0.0207878	-0.0170015	-0.0114581	-0.0143524	-0.0128089	0.00338941	0.00998904	-0.0144271	-0.00253669	-0.00659975
1	1	1	1	0.406109	0.948445	0.018008	-0.019981	0.013426	0.00716011	-0.0207441	-0.0044334	0.0204957	-0.017536	0.0136435	-0.0215611	-0.00494746	0.0162932	0.0225771	-0.00500988	0.0067427	-0.0177639	0.0198171	-0.00755305	-0.0114581	-0.0162634	-0.0138057	0.008988	0.0125624	-0.0141865	-0.00616825	-0.0138322
1	1	1	1	0.406109	0.948445	0.000753786	-0.019981	-0.0171801	0.00553953	-0.0207441	-0.00747169	0.00963441	-0.017536	0.00943906	-0.0163455	0.00106696	0.0179035	0.0135278	-0.00180872	0.00248396	-0.010228	0.0095273	0.0106925	-0.0114581	-0.0162634	-0.00978021	0.0154635	0.0129856	-0.00995417	-0.0110404	-0.0209446
1	1	1	1	0.406109	0.948445	0.0192436	-0.019981	0.0146305	0.0050546	-0.0207441	-0.00649092	0.0188659	-0.017536	0.0136856	-0.0205009	-0.00720333	0.0155794	0.0232324	-0.00511321	0.00513026	-0.0160474	0.0116517	-0.00346512	-0.0114581	-0.0162634	-0.0108507	0.00752501	0.010362	-0.0116509	-0.00684563	-0.0129228
1	1	0	1	0.406109	0.948445	-0.0227141	-0.0133139	-0.0207151	-0.00425822	-0.0139762	-0.00747169	-0.0167441	-0.017536	-0.00321722	-0.000973463	-0.0110147	-0.0107633	-0.00190829	-0.0017409	0.000892313	0.00214063	0.0104566	-0.0236151	-0.0114581	-0.0108964	-0.0116289	-0.00418604	0.00574974	-0.0133651	-1.75467e-07	-6.93747e-07
1	1	0	1	0.406109	0.948445	-0.0227141	-0.0135559	-0.0207151	-0.00404299	-0.0147814	-0.00747169	-0.0161352	-0.017536	-0.00286292	-0.00134565	-0.0110815	-0.010386	-0.00148735	-0.00180675	0.00100747	0.00184382	0.0111465	-0.0241068	-0.0114581	-0.0109233	-0.011831	-0.00418509	0.00588881	-0.0136216	-1.2999e-05	-4.15838e-05
1	1	1	1	0.406109	0.948445	-0.0109387	-0.0177931	-0.0174464	-0.000136527	-0.0207441	-0.00747169	-0.00255016	-0.017536	0.00489952	-0.00774342	-0.010358	-0.00231792	0.00884183	-0.00338746	0.00337707	-0.00662723	0.00970821	-0.0193789	-0.0114581	-0.0133374	-0.011519	-0.00229251	0.00647598	-0.013004	-0.00164391	-0.00284648
1	1	1	1	0.406109	0.948445	0.0279865	-0.019981	0.0365315	5.23858e-05	-0.0207441	-0.00603772	0.0191645	-0.017536	0.0164509	-0.0209353	-0.011281	0.0119092	0.0266685	-0.00586331	0.0052889	-0.0163406	0.0157221	-0.0204227	-0.0114581	-0.0118277	-0.0118381	-0.0004832	0.00765462	-0.0135719	-0.00093692	-0.00270441
1	1	1	1	0.406109	0.948445	0.0254856	-0.019981	0.0310109	0.00100659	-0.0207441	-0.00389412	0.0189873	-0.017536	0.0157783	-0.0203643	-0.0119593	0.0100008	0.0267344	-0.00552017	0.0059446	-0.0158472	0.0113604	-0.00814455	-0.0114581	-0.0158806	-0.0102446	0.00445857	0.0088666	-0.0116025	-0.00403584	-0.00860118
1	1	1	1	0.406109	0.948445	0.0441216	-0.019981	0.0535356	0.0029634	-0.0207441	0.00020232	0.032061	-0.017536	0.0206478	-0.028571	-0.0133421	0.0185461	0.0363861	-0.00752854	0.00656789	-0.021889	0.0175433	-0.00506032	-0.0114581	-0.0162634	-0.0117084	0.00889754	0.0116071	-0.0126723	-0.00521897	-0.0125468
1	1	1	1	0.406109	0.948445	0.0268901	-0.019981	0.0357063	-0.00101829	-0.0207441	-0.00734281	0.0169499	-0.017536	0.0159076	-0.0204309	-0.0117525	0.0115921	0.0264598	-0.00556913	0.00491423	-0.0146289	0.0131342	-0.019795	-0.0114581	-0.011437	-0.0113513	-0.00103543	0.00703737	-0.0129904	-0.000698823	-0.00217972
1	1	1	1	0.406109	0.948445	0.0177949	-0.019981	0.0171071	0.0059834	-0.0207441	-0.00172734	0.0192173	-0.017536	0.0133279	-0.0210436	-0.0083834	0.0120607	0.0236996	-0.00573955	0.00731451	-0.0169804	0.0133004	-0.00101461	-0.0114581	-0.0162634	-0.0125345	0.00994587	0.0122609	-0.0130702	-0.00717923	-0.0160785
1	1	1	1	0.406109	0.948445	-0.0227141	-0.0156352	-0.0207151	-0.00283807	-0.0207441	-0.00747169	-0.010722	-0.017536	0.000208211	-0.00337843	-0.0114365	-0.00868879	0.00221279	-0.00241477	0.00200983	-0.00140214	0.011722	-0.0234271	-0.0114581	-0.0115428	-0.0119463	-0.00362739	0.00621925	-0.0136765	-0.000237607	-0.00062345
1	1	1	1	0.406109	0.948445	0.0265025	-0.019981	0.0319099	0.00510866	-0.0207441	4.42366e-05	0.0241488	-0.017536	0.0165005	-0.0232487	-0.0110193	0.0117044	0.0280921	-0.00665077	0.0085934	-0.0202118	0.017551	-0.00885185	-0.0114581	-0.0162634	-0.0133877	0.00756388	0.0117061	-0.0140976	-0.00413226	-0.0115925
1	1	1	1	0.406109	0.948445	0.0323018	-0.019981	0.033064	0.0109627	-0.0207441	0.012015	0.0347818	-0.017536	0.0150925	-0.0309268	-0.00783173	0.0218312	0.032473	-0.00748535	0.00872053	-0.0214692	0.0250405	0.0271111	-0.0114581	-0.0162634	-0.0148502	0.0312902	0.0225766	-0.0131033	-0.0153252	-0.0371409
1	1	1	1	0.406109	0.948445	0.0120801	-0.019981	-0.0207151	0.010397	-0.0207441	0.0410698	0.0398774	-0.017536	0.00597939	-0.0272866	-0.00428154	0.0255009	0.026482	-0.00689523	-0.00248792	-0.0151962	0.0470472	0.052438	-0.0114581	-0.0162634	-0.0262171	0.0564916	0.0384432	-0.0183656	-0.0407588	-0.0742124
1	1	1	1	0.406109	0.948445	0.0309201	-0.019981	0.033439	0.00296024	-0.0207441	-0.00569847	0.0234472	-0.017536	0.0168515	-0.0241172	-0.00569068	0.0194211	0.0279848	-0.00493021	0.00528179	-0.0177285	0.0190847	-0.00819723	-0.0114581	-0.0157433	-0.0110619	0.0075728	0.0108229	-0.0124303	-0.00505992	-0.0105289
1	1	1	1	0.406109	0.948445	-0.0102927	-0.0178653	-0.0135515	-0.000422908	-0.0207441	-0.00747169	-0.000990212	-0.017536	0.00532895	-0.00763428	-0.0114482	-0.00331607	0.00814449	-0.00353917	0.00322513	-0.00732544	0.0129733	-0.0222371	-0.0114581	-0.012343	-0.0122077	-0.00244237	0.0068693	-0.0138218	-0.000619118	-0.00174334
1	1	1	1	0.406109	0.948445	0.0450705	-0.019981	0.0549452	0.00474038	-0.0207441	0.00454237	0.0348178	-0.017536	0.0200069	-0.0305309	-0.012517	0.0199101	0.0374135	-0.00773762	0.00731066	-0.0223126	0.0205677	0.00357019	-0.0114581	-0.0162634	-0.0120241	0.0153615	0.0146347	-0.0128171	-0.00717088	-0.0185595
1	1	1	1	0.406109	0.948445	0.0221644	-0.019981	0.0179121	0.00995324	-0.0207441	0.000109596	0.0249478	-0.017536	0.0138057	-0.0242693	-0.00306488	0.0199828	0.0247843	-0.00581542	0.00778982	-0.0193329	0.024391	-0.00435831	-0.0114581	-0.0162634	-0.0151507	0.0124626	0.0149874	-0.0155399	-0.00828907	-0.018238
1	1	1	1	0.406109	0.948445	-0.0185463	-0.0127458	-0.0207151	-0.000120056	-0.0207441	-0.00747169	-0.00494131	-0.017536	0.00535469	-0.00747225	0.00154657	0.0104725	0.00446208	0.001102	-0.00200539	-0.00101748	0.00198869	0.0073302	-0.0114581	-0.0162634	-0.00788522	0.0104075	0.00962607	-0.00838958	-0.0114505	-0.017151
1	1	1	1	0.406109	0.948445	0.0278709	-0.019981	0.00984553	0.0148581	-0.0207441	0.0307305	0.0423192	-0.017536	0.00963947	-0.0331327	-0.00575786	0.0265992	0.0325422	-0.00853486	0.00528731	-0.0207111	0.0276758	0.0646991	-0.0114581	-0.0162634	-0.0194805	0.0563678	0.0341753	-0.0116238	-0.0341645	-0.0682906
1	1	1	1	0.406109	0.948445	0.0260184	-0.019981	0.0291476	0.00551089	-0.0207441	-0.00221736	0.0226906	-0.017536	0.0151533	-0.0239048	-0.00511169	0.0171868	0.0262868	-0.00525348	0.00770292	-0.0187112	0.0187176	-0.00279978	-0.0114581	-0.0162634	-0.0117555	0.0103016	0.012342	-0.0128039	-0.00643326	-0.0145978
1	1	1	1	0.406109	0.948445	-0.00039454	-0.019981	0.00366185	-0.000693535	-0.0207441	-0.00667098	0.00250175	-0.017536	0.00663477	-0.0113377	-0.00947213	0.000463607	0.0122629	-0.00406413	0.00441307	-0.00884179	0.0124511	-0.0212727	-0.0114581	-0.0116802	-0.0114756	-0.00230146	0.00661421	-0.0132672	-0.000742524	-0.00160867
1	1	1	1	0.406109	0.948445	0.0224408	-0.019981	0.0208458	0.00607902	-0.0207441	0.000213714	0.0232688	-0.017536	0.0141716	-0.0239964	-0.00788268	0.0161759	0.0263482	-0.00549835	0.00639663	-0.016901	0.0163834	0.0102146	-0.0114581	-0.0162634	-0.0119027	0.0170969	0.0151342	-0.0121247	-0.0101426	-0.0229218
1	1	1	1	0.406109	0.948445	0.0268901	-0.019981	0.0357063	-0.00101829	-0.0207441	-0.00734281	0.0169499	-0.017536	0.0159076	-0.0204309	-0.0117525	0.0115921	0.0264598	-0.00556913	0.00491423	-0.0146289	0.0131342	-0.019795	-0.0114581	-0.011437	-0.0113513	-0.00103543	0.00703737	-0.0129904	-0.000698823	-0.00217972
1	1	1	1	0.406109	0.948445	0.0372354	-0.019981	0.043431	0.00386511	-0.0207441	0.00287195	0.0298212	-0.017536	0.0173755	-0.0287504	-0.00969103	0.0202282	0.0331704	-0.00612358	0.00597696	-0.0188756	0.0213337	0.00966905	-0.0114581	-0.0162634	-0.0114104	0.0182256	0.0156292	-0.011927	-0.0100763	-0.0224384
1	1	1	1	0.406109	0.948445	-0.0146214	-0.0102771	-0.0207151	-0.00233666	-0.0207441	-0.00747169	-0.00447981	-0.017536	0.007444	-0.00764444	0.00798758	0.015499	0.00481961	0.00278428	-0.00410039	-0.00073144	-0.00436339	0.00819002	-0.0114581	-0.0148568	-0.00497504	0.0105857	0.00760768	-0.00523744	-0.0140938	-0.0154414
1	1	1	1	0.406109	0.948445	0.0492422	-0.019981	0.0623915	0.00820974	-0.0207441	0.00954546	0.0394178	-0.017536	0.0196717	-0.0341316	-0.00819055	0.024072	0.0388792	-0.00819055	0.0100558	-0.0255892	0.0328442	0.00236233	-0.0114581	-0.0162634	-0.01399	0.0190155	0.0176502	-0.0146736	-0.00790997	-0.0210671
1	1	1	1	0.406109	0.948445	0.0454191	-0.019981	0.0593686	0.0035587	-0.0207441	0.0013872	0.0319956	-0.017536	0.0205143	-0.0288302	-0.0109365	0.0187915	0.0359313	-0.00760482	0.00822314	-0.0232256	0.0217478	-0.0140468	-0.0114581	-0.0154318	-0.0123613	0.00525991	0.0107257	-0.014153	-0.00312983	-0.00817943
1	1	0	1	0.406109	0.948445	-0.0227141	-0.0148842	-0.0207151	-0.00251593	-0.0207441	-0.00747169	-0.012027	-0.017536	-0.000215307	-0.00327236	-0.0103875	-0.00751977	0.0024498	-0.00226791	0.00191284	-0.000994355	0.00923991	-0.0216968	-0.0114581	-0.0118091	-0.0113375	-0.00375622	0.00574974	-0.0129302	-0.000691354	-0.000951588
1	1	1	1	0.406109	0.948445	0.0380709	-0.019981	0.0472256	0.00736364	-0.0207441	0.00308327	0.0312766	-0.017536	0.0183	-0.0285074	-0.00759167	0.0196304	0.0326812	-0.00724998	0.00979809	-0.0236985	0.024551	-0.00609432	-0.0114581	-0.0162634	-0.0131198	0.0109858	0.0135466	-0.0142907	-0.00544755	-0.014201
1	1	1	1	0.406109	0.948445	-0.0211441	-0.015682	-0.0207151	-0.00332901	-0.0207441	-0.00747169	-0.0108424	-0.017536	0.000281139	-0.00415887	-0.0110802	-0.00722004	0.00305498	-0.0023773	0.00197926	-0.00101857	0.0109121	-0.0228038	-0.0114581	-0.0113461	-0.0116232	-0.00357173	0.00603986	-0.0133488	-0.000174568	-0.000547591
1	1	1	1	0.406109	0.948445	0.0291107	-0.019981	0.0303604	0.0130194	-0.0207441	0.0101291	0.0328739	-0.017536	0.0149772	-0.0284271	-0.00650166	0.0185981	0.0298354	-0.00810986	0.0110535	-0.0237152	0.0347954	-0.00304227	-0.0114581	-0.0162634	-0.0198248	0.0179481	0.019642	-0.0187722	-0.00942445	-0.0241203
1	1	1	1	0.406109	0.948445	-0.0110693	-0.0151555	-0.0207151	0.00401503	-0.0207441	-0.00747169	0.000896631	-0.017536	0.00677894	-0.0112405	0.00635942	0.0173018	0.00658919	0.000244961	0.000266096	-0.00553075	0.0146752	-0.00526894	-0.0114581	-0.0162634	-0.0115038	0.00926766	0.0113352	-0.0122341	-0.00791826	-0.0132225
1	1	1	1	0.406109	0.948445	0.0112362	-0.019981	-0.00479589	0.005723	-0.0207441	-0.00704512	0.0185786	-0.017536	0.0112589	-0.0227306	0.00373932	0.0248709	0.0187169	-0.00138011	0.00144917	-0.0113549	0.0139313	0.0234956	-0.0114581	-0.0162634	-0.00900467	0.025306	0.0166306	-0.00809276	-0.0190588	-0.0307874
1	1	1	1	0.406109	0.948445	0.0268901	-0.019981	0.0357063	-0.00101829	-0.0207441	-0.00734281	0.0169499	-0.017536	0.0159076	-0.0204309	-0.0117525	0.0115921	0.0264598	-0.00556913	0.00491423	-0.0146289	0.0131342	-0.019795	-0.0114581	-0.011437	-0.0113513	-0.00103543	0.00703737	-0.0129904	-0.000698823	-0.00217972
1	1	1	1	0.406109	0.948445	0.0463754	-0.019981	0.0566609	0.00688021	-0.0207441	0.00449255	0.0364523	-0.017536	0.0208141	-0.0310461	-0.0100257	0.0213182	0.0375023	-0.00826441	0.00916891	-0.0252863	0.024088	-0.00617949	-0.0114581	-0.0162634	-0.0141791	0.0114113	0.0140439	-0.0149015	-0.00554868	-0.0149148
1	1	1	1	0.406109	0.948445	0.0377927	-0.019981	0.0458799	0.00104792	-0.0207441	-0.00282748	0.0262826	-0.017536	0.0193458	-0.0244264	-0.0129887	0.0146641	0.0326608	-0.00655975	0.00557076	-0.0186542	0.0162086	-0.0129026	-0.0114581	-0.0152947	-0.0115576	0.00371424	0.00938742	-0.013071	-0.00324588	-0.00745739
1	1	1	1	0.406109	0.948445	0.0433306	-0.019981	0.0514704	0.00618053	-0.0207441	0.00611052	0.0349289	-0.017536	0.0188181	-0.030718	-0.0101068	0.0214544	0.0363833	-0.00765111	0.007618	-0.0223207	0.0303063	-0.0027924	-0.0114581	-0.0162634	-0.0145209	0.0148282	0.0160543	-0.01517	-0.00756744	-0.0184537
1	1	1	0	0.406109	0.948445	-0.0105119	-0.0167516	-0.0142608	-0.00111941	-0.0207441	-0.00747169	-0.00416038	-0.017536	0.00360362	-0.00808818	-0.00616729	0.000608616	0.0069909	-0.00262643	0.00261932	-0.00557317	0.0105262	-0.0206078	-0.0114581	-0.0113164	-0.010869	-0.00296219	0.00594526	-0.0125888	-0.0012316	-0.00148914
1	1	1	1	0.406109	0.948445	0.0092536	-0.019981	0.0106231	0.00122806	-0.0207441	-0.00659705	0.0101337	-0.017536	0.0114835	-0.0147422	-0.0107859	0.00416456	0.0184186	-0.00485038	0.00578945	-0.0134908	0.0131721	-0.0187889	-0.0114581	-0.0134204	-0.0117308	-0.00059389	0.0074992	-0.0133928	-0.00154638	-0.00364737
1	1	1	1	0.406109	0.948445	0.0268901	-0.019981	0.0357063	-0.00101829	-0.0207441	-0.00734281	0.0169499	-0.017536	0.0159076	-0.0204309	-0.0117525	0.0115921	0.0264598	-0.00556913	0.00491423	-0.0146289	0.0131342	-0.019795	-0.0114581	-0.011437	-0.0113513	-0.00103543	0.00703737	-0.0129904	-0.000698823	-0.00217972
1	1	1	1	0.406109	0.948445	-0.00213194	-0.019981	-0.00144026	0.000284452	-0.0207441	-0.00735994	0.00409938	-0.017536	0.00756876	-0.0109726	-0.0108533	-3.5676e-05	0.011791	-0.00406991	0.00431531	-0.0101958	0.0157155	-0.0230941	-0.0114581	-0.0122793	-0.0125824	-0.00198907	0.00738208	-0.014263	-0.000619923	-0.00188515
1	1	1	1	0.406109	0.948445	0.0368582	-0.019981	-0.00193628	0.0249733	-0.0207441	0.0841153	0.0632545	-0.017536	-0.00429345	-0.0358757	-0.0166469	0.0226936	0.0422616	-0.0208108	0.0079707	-0.0307415	0.0634322	0.0916343	-0.0114581	-0.0162634	-0.0333595	0.0883679	0.0549738	-0.0205086	-0.0457459	-0.102695
1	1	1	1	0.406109	0.948445	0.0123329	-0.019981	0.0154348	0.0016072	-0.0207441	-0.00627287	0.0121825	-0.017536	0.0120549	-0.016007	-0.00945078	0.00655538	0.0189595	-0.00482396	0.00579069	-0.0141881	0.0154033	-0.0195715	-0.0114581	-0.0131167	-0.0119331	-0.000307345	0.00780453	-0.0136234	-0.00143495	-0.00348786
1	1	1	1	0.406109	0.948445	0.047706	-0.019981	0.0627035	0.00420821	-0.0207441	0.00321676	0.0345997	-0.017536	0.021581	-0.0296906	-0.0105852	0.0190972	0.0371792	-0.00767698	0.00896456	-0.0241545	0.0267177	-0.0149158	-0.0114581	-0.0158841	-0.0136222	0.00671918	0.0120779	-0.015164	-0.00337419	-0.00925746
1	1	1	1	0.406109	0.948445	0.022692	-0.019981	0.0228437	0.00479156	-0.0207441	-0.000442699	0.0217435	-0.017536	0.01427	-0.0236223	-0.00617836	0.0163571	0.0257953	-0.00489516	0.00649449	-0.0164377	0.0224102	0.00142176	-0.0114581	-0.0162634	-0.0128954	0.01383	0.0146184	-0.0136218	-0.00908009	-0.0194277
1	1	1	1	0.406109	0.948445	0.0176285	-0.019981	0.0207015	0.00374032	-0.0207441	-0.00351786	0.0175137	-0.017536	0.0139965	-0.0188355	-0.00936421	0.00928118	0.0222866	-0.00546478	0.00692292	-0.0165912	0.0214758	-0.0207889	-0.0114581	-0.0146724	-0.0135458	0.00133805	0.00957398	-0.0152809	-0.00200601	-0.00519302
1	1	1	1	0.406109	0.948445	0.0320184	-0.019981	0.0302264	0.00822125	-0.0207441	0.00643297	0.0318882	-0.017536	0.0153971	-0.0290817	-0.00646552	0.023104	0.0314893	-0.0064986	0.00598318	-0.01895	0.0219424	0.0181143	-0.0114581	-0.0162634	-0.0138388	0.0233587	0.019003	-0.0133344	-0.0147	-0.0313679
1	1	1	1	0.406109	0.948445	0.000509512	-0.019981	0.00196133	-0.000321319	-0.0207441	-0.00747169	0.00281877	-0.017536	0.00736584	-0.0112252	-0.00904424	0.00120128	0.0131702	-0.00391095	0.00450768	-0.00887582	0.0106721	-0.0196135	-0.0114581	-0.0123959	-0.0111773	-0.00213598	0.00644295	-0.0128589	-0.00137791	-0.00233288
1	1	1	1	0.406109	0.948445	-0.0227141	-0.0064196	-0.0207151	-0.00262772	-0.0154628	-0.00747169	-0.0159413	-0.017536	0.0022659	-0.00012829	0.00392457	0.00535365	-0.00182863	0.00236088	-0.00376683	0.0034986	0.00574412	-0.00935241	-0.0114581	-0.0131121	-0.0089672	0.00301977	0.00713828	-0.0100694	-0.00567605	-0.0070652
1	1	1	1	0.406109	0.948445	0.00743272	-0.019981	0.0128703	5.68617e-05	-0.0207441	-0.00608655	0.00767821	-0.017536	0.00961938	-0.0139171	-0.00975286	0.00316623	0.0162516	-0.0045552	0.00529894	-0.0117444	0.0129191	-0.0201175	-0.0114581	-0.0121252	-0.0114997	-0.00146303	0.00698114	-0.0131874	-0.000978779	-0.00233097
1	1	1	1	0.406109	0.948445	0.000555441	-0.019981	-0.0207151	0.0130472	-0.0207441	0.0250728	0.0351482	-0.017536	0.00584811	-0.0312306	0.00467252	0.0310648	0.0185251	-0.00171955	-0.00161543	-0.0112626	0.0218076	0.0981283	-0.0114581	-0.0162634	-0.0182395	0.0748175	0.0408168	-0.00830287	-0.0469256	-0.0901729
1	1	1	1	0.406109	0.948445	0.0268388	-0.019981	0.0297388	0.0061717	-0.0207441	-0.00183774	0.0238138	-0.017536	0.0159517	-0.0233763	-0.00748626	0.0160582	0.026927	-0.00620634	0.00793767	-0.0199715	0.0205487	-0.0123114	-0.0114581	-0.0162634	-0.0130398	0.00567281	0.0111759	-0.0144967	-0.00450327	-0.010307
1	1	1	1	0.406109	0.948445	0.0118084	-0.019981	0.0147237	5.06604e-05	-0.0207441	-0.00667612	0.00982864	-0.017536	0.0120166	-0.0148995	-0.00942786	0.00495659	0.0194128	-0.00429088	0.00549732	-0.0121752	0.0110266	-0.0154448	-0.0114581	-0.0138144	-0.0107571	0.000167195	0.00726993	-0.0123879	-0.00253144	-0.00471566
1	1	1	1	0.406109	0.948445	0.0285858	-0.019981	0.0236888	0.0143595	-0.0207441	0.018489	0.0369251	-0.017536	0.0124486	-0.0322834	-0.00576412	0.0239662	0.0312778	-0.00772253	0.00886899	-0.0211513	0.0297785	0.037968	-0.0114581	-0.0162634	-0.0166005	0.0394289	0.0271612	-0.0142318	-0.0201105	-0.0473192
1	1	1	1	0.406109	0.948445	0.044558	-0.019981	0.0537857	0.0089362	-0.0207441	0.0165028	0.0396396	-0.017536	0.0173523	-0.0328866	-0.00865033	0.0219929	0.0382225	-0.0086228	0.00943724	-0.0230473	0.0442914	-0.000635746	-0.0114581	-0.0162634	-0.0178787	0.0217041	0.0211798	-0.0182352	-0.00987828	-0.0251055
1	1	1	1	0.406109	0.948445	0.0407738	-0.019981	0.0507305	0.00236379	-0.0207441	-0.00246327	0.0286602	-0.017536	0.0203918	-0.0263345	-0.0119795	0.0168588	0.0336982	-0.00705295	0.00690991	-0.0216597	0.0156146	-0.0126435	-0.0114581	-0.0144346	-0.0113632	0.00387263	0.00926341	-0.0127939	-0.0027799	-0.00707162
1	1	1	1	0.406109	0.948445	0.0433899	-0.019981	0.0540932	0.00300701	-0.0207441	-0.0018834	0.0312121	-0.017536	0.0213143	-0.0274915	-0.0113171	0.0185526	0.0345554	-0.00699458	0.00729047	-0.0227365	0.0188147	-0.0122543	-0.0114581	-0.0148998	-0.0118999	0.00535174	0.0102186	-0.0132028	-0.00298363	-0.00805014
1	1	1	1	0.406109	0.948445	-0.0153674	-0.019981	-0.0207151	0.0042582	-0.0207441	-0.00747169	0.0127327	-0.017536	0.00870382	-0.0195984	0.00846301	0.0240051	0.00706279	0.00387145	-0.00512499	-0.00287022	-0.0127268	0.0629106	-0.0114581	-0.0162634	-0.00469071	0.0389785	0.0188803	-0.000996808	-0.040194	-0.054887
1	1	1	1	0.406109	0.948445	-0.0227141	-0.00951959	-0.0207151	-0.00188997	-0.0158562	-0.00747169	-0.0135434	-0.017536	0.00297301	-0.00229732	0.0048137	0.00776753	-0.0013258	0.00269453	-0.00381643	0.00328424	-0.00141701	0.00651488	-0.0114581	-0.0162634	-0.0078664	0.00884319	0.00884396	-0.00837	-0.0126386	-0.0170918
1	1	1	1	0.406109	0.948445	0.0175411	-0.019981	-0.00584922	0.012418	-0.0207441	0.0166844	0.0342383	-0.017536	0.00949394	-0.0295601	-0.000357195	0.028755	0.0257199	-0.00485648	0.00166073	-0.0145998	0.0390991	0.0340276	-0.0114581	-0.0162634	-0.0177505	0.0430084	0.0290275	-0.0146569	-0.0238589	-0.048279
1	1	1	1	0.406109	0.948445	0.00402759	-0.019981	-0.0207151	0.00208577	-0.0207441	0.00119432	0.0210261	-0.017536	0.0100424	-0.0248865	0.00358595	0.025989	0.0178122	0.00130661	-0.00372474	-0.00678845	-0.00864453	0.0775302	-0.0114581	-0.0162634	-0.00284426	0.0486642	0.02198	0.00146363	-0.0420727	-0.0615397
1	1	1	1	0.406109	0.948445	0.0196954	-0.019981	-0.0160418	0.0296418	-0.0207441	0.0550662	0.049364	-0.017536	-0.00204724	-0.033314	-0.00584993	0.0227402	0.026841	-0.0133819	0.0102523	-0.0256451	0.0519825	0.0564807	-0.0114581	-0.0162634	-0.0282638	0.0617241	0.0415075	-0.019147	-0.0396441	-0.0769911
1	1	0	1	0.406109	0.948445	-0.0227141	-0.0150908	-0.0207151	-0.00331955	-0.0195105	-0.00747169	-0.0126944	-0.017536	-0.000743108	-0.00243441	-0.0115561	-0.00983242	0.00128919	-0.00226846	0.00178149	-0.000328483	0.0102252	-0.022633	-0.0114581	-0.0114808	-0.0115994	-0.0037416	0.00592612	-0.013288	-0.000279156	-0.000578359
1	1	1	1	0.406109	0.948445	0.0379543	-0.019981	0.0484403	0.00167789	-0.0207441	-0.00283805	0.0266375	-0.017536	0.0199303	-0.0246307	-0.0112336	0.0147747	0.0320358	-0.00649114	0.00711539	-0.0205282	0.0169171	-0.0146684	-0.0114581	-0.0144771	-0.0120815	0.00335172	0.00942198	-0.0135069	-0.00256859	-0.00670715
1	1	1	1	0.406109	0.948445	0.0260404	-0.019981	0.024743	0.00773686	-0.0207441	0.00359544	0.0273617	-0.017536	0.0146086	-0.0271431	-0.00621291	0.0203574	0.0281394	-0.00557884	0.00684006	-0.0182019	0.0154819	0.0249801	-0.0114581	-0.0162634	-0.0116598	0.0251634	0.0183607	-0.0109905	-0.0148881	-0.0323711
1	1	1	1	0.406109	0.948445	0.0422093	-0.019981	0.0479044	0.00828694	-0.0207441	0.01222	0.0383157	-0.017536	0.0174013	-0.0338053	-0.00977	0.0240926	0.0374467	-0.0077126	0.00772854	-0.0220323	0.0236755	0.0322492	-0.0114581	-0.0162634	-0.0130884	0.033235	0.0224976	-0.0112977	-0.0163798	-0.0383733
1	1	1	1	0.406109	0.948445	0.0159187	-0.019981	0.0153114	0.00416552	-0.0207441	-0.00557566	0.0153093	-0.017536	0.012678	-0.0186491	-0.006799	0.011532	0.021525	-0.00490893	0.00649694	-0.0154275	0.0128608	-0.0102116	-0.0114581	-0.0162634	-0.011806	0.00383495	0.00940825	-0.0129474	-0.00476954	-0.00949094
1	1	1	1	0.406109	0.948445	0.0268901	-0.019981	0.0357063	-0.00101829	-0.0207441	-0.00734281	0.0169499	-0.017536	0.0159076	-0.0204309	-0.0117525	0.0115921	0.0264598	-0.00556913	0.00491423	-0.0146289	0.0131342	-0.019795	-0.0114581	-0.011437	-0.0113513	-0.00103543	0.00703737	-0.0129904	-0.000698823	-0.00217972
1	1	1	1	0.406109	0.948445	0.0150913	-0.019981	0.00178396	0.0120491	-0.0207441	0.00344509	0.0255318	-0.017536	0.0107223	-0.0250587	-0.00202476	0.0216224	0.0222932	-0.00503301	0.00573751	-0.0163763	0.015314	0.0263818	-0.0114581	-0.0162634	-0.0137791	0.027299	0.0196769	-0.0111549	-0.0191933	-0.036538
1	1	1	1	0.406109	0.948445	0.0332966	-0.019981	0.0427673	0.00159975	-0.0207441	-0.00365136	0.0238855	-0.017536	0.0182264	-0.0232247	-0.011523	0.0139072	0.0296751	-0.00651724	0.00624173	-0.0187415	0.0196424	-0.0217351	-0.0114581	-0.0125624	-0.0128359	0.000254088	0.00863711	-0.014594	-0.00104368	-0.00334521
1	1	1	1	0.406109	0.948445	0.0451227	-0.019981	0.0538993	0.00731441	-0.0207441	0.0103543	0.0380171	-0.017536	0.0186501	-0.0332348	-0.010405	0.022842	0.0383287	-0.00805435	0.00821235	-0.0230303	0.0250333	0.01946	-0.0114581	-0.0162634	-0.0131523	0.0260782	0.0198423	-0.0126993	-0.0128575	-0.0307571
1	1	1	1	0.406109	0.948445	0.0162163	-0.019981	0.0219796	0.00116818	-0.0207441	-0.00556288	0.0133277	-0.017536	0.0128856	-0.0170065	-0.00965416	0.00681912	0.0210309	-0.00503797	0.00642955	-0.0148423	0.0126991	-0.0174037	-0.0114581	-0.0132213	-0.0115804	9.32736e-05	0.00762728	-0.0130382	-0.00174761	-0.00404797
1	1	1	1	0.406109	0.948445	0.00353983	-0.019981	0.00886029	-0.000326236	-0.0207441	-0.00659433	0.00469009	-0.017536	0.00766051	-0.0128543	-0.0083943	0.00276137	0.0138126	-0.00417293	0.00480215	-0.0100542	0.0135066	-0.0209675	-0.0114581	-0.0119151	-0.0114959	-0.00184087	0.0068816	-0.0133002	-0.000922169	-0.00196489
1	1	1	1	0.406109	0.948445	0.0110692	-0.019981	0.0108513	0.00184374	-0.0207441	-0.00747169	0.0111466	-0.017536	0.0120592	-0.0154322	-0.00937676	0.00641237	0.0191613	-0.00471691	0.00585433	-0.0141268	0.0120891	-0.0174209	-0.0114581	-0.0137948	-0.0116839	-0.000198628	0.00752469	-0.0130846	-0.00201822	-0.00431118
1	1	1	1	0.406109	0.948445	0.0268901	-0.019981	0.0357063	-0.00101829	-0.0207441	-0.00734281	0.0169499	-0.017536	0.0159076	-0.0204309	-0.0117525	0.0115921	0.0264598	-0.00556913	0.00491423	-0.0146289	0.0131342	-0.019795	-0.0114581	-0.011437	-0.0113513	-0.00103543	0.00703737	-0.0129904	-0.000698823	-0.00217972
1	1	1	1	0.406109	0.948445	0.0425633	-0.019981	0.0534776	0.00317737	-0.0207441	-0.0011704	0.0307988	-0.017536	0.0211514	-0.0269356	-0.01173	0.0171707	0.0345258	-0.00726958	0.00759534	-0.0226487	0.01949	-0.0153179	-0.0114581	-0.0145867	-0.0125548	0.00394918	0.00999076	-0.0139358	-0.00247699	-0.00692555
1	1	1	1	0.406109	0.948445	-0.0134086	-0.0182974	-0.0207151	0.00129683	-0.0207441	-0.00747169	0.000328742	-0.017536	0.00731025	-0.0116487	0.00600005	0.0168238	0.00692206	0.00153384	-0.00170443	-0.00297169	0.0130762	0.00944781	-0.0114581	-0.0162634	-0.00977037	0.016009	0.0135039	-0.010243	-0.0122636	-0.0213447
1	1	1	1	0.406109	0.948445	0.0475591	-0.019981	0.0574449	0.0106058	-0.0207441	0.0131886	0.0407471	-0.017536	0.0187458	-0.0340907	-0.00746986	0.0247347	0.038788	-0.00897822	0.0105403	-0.0261143	0.039425	0.000107291	-0.0114581	-0.0162634	-0.0171361	0.0204376	0.0199396	-0.017189	-0.00919068	-0.0238729
1	1	1	1	0.406109	0.948445	0.0478095	-0.019981	0.0557096	0.0133285	-0.0207441	0.0197583	0.0446498	-0.017536	0.0171586	-0.0369034	-0.00625538	0.0270969	0.0397471	-0.00939878	0.0112081	-0.0269024	0.0353256	0.0246462	-0.0114581	-0.0162634	-0.0178148	0.0343397	0.0252467	-0.0148201	-0.0158288	-0.039064
1	1	1	1	0.406109	0.948445	0.0363245	-0.019981	0.0432645	0.00280352	-0.0207441	-0.00457043	0.0265002	-0.017536	0.0192166	-0.0247236	-0.0109375	0.0164696	0.0311463	-0.00673555	0.00650292	-0.0210456	0.0151911	-0.0150373	-0.0114581	-0.0136418	-0.0118439	0.00255994	0.00880188	-0.0130604	-0.00230334	-0.00592172
1	1	1	1	0.406109	0.948445	0.0405624	-0.019981	0.050811	0.00217036	-0.0207441	-0.00374881	0.0287021	-0.017536	0.0207615	-0.0257432	-0.0116248	0.0169385	0.0328209	-0.0068646	0.00671999	-0.0219149	0.0161955	-0.0147805	-0.0114581	-0.013521	-0.0115765	0.00294102	0.00893197	-0.0129726	-0.00217809	-0.00588075
1	1	1	1	0.406109	0.948445	0.0135593	-0.019981	-0.00841019	0.00921628	-0.0207441	0.00542863	0.0289199	-0.017536	0.0103125	-0.0295256	0.00235	0.0306734	0.0231182	-0.0021933	0.000398257	-0.0116186	0.0273422	0.0555499	-0.0114581	-0.0162634	-0.0121708	0.0509262	0.029209	-0.00875666	-0.0252187	-0.0536208
1	1	1	1	0.406109	0.948445	0.0271375	-0.019981	0.02061	0.00849939	-0.0207441	0.00964303	0.0323572	-0.017536	0.0132911	-0.0312213	-0.00366992	0.026637	0.0298361	-0.00488452	0.0044895	-0.0163982	0.0240055	0.0455811	-0.0114581	-0.0162634	-0.0129018	0.0417498	0.0256939	-0.00986508	-0.0211547	-0.0470421
1	1	1	1	0.406109	0.948445	0.0268901	-0.019981	0.0357063	-0.00101829	-0.0207441	-0.00734281	0.0169499	-0.017536	0.0159076	-0.0204309	-0.0117525	0.0115921	0.0264598	-0.00556913	0.00491423	-0.0146289	0.0131342	-0.019795	-0.0114581	-0.011437	-0.0113513	-0.00103543	0.00703737	-0.0129904	-0.000698823	-0.00217972
1	1	1	1	0.406109	0.948445	-0.019422	-0.0160104	-0.0207151	-0.00204188	-0.0207441	-0.00747169	-0.00828012	-0.017536	0.000727405	-0.00507457	-0.0102019	-0.00599618	0.00298835	-0.00274754	0.00216536	-0.00304564	0.0132193	-0.0244121	-0.0114581	-0.0113184	-0.0121501	-0.0036722	0.00637924	-0.0139976	-0.000181832	-0.000460777
1	1	1	1	0.406109	0.948445	0.00611874	-0.019981	0.00418917	0.000837442	-0.0207441	-0.00747169	0.00804396	-0.017536	0.0111219	-0.012942	-0.0109614	0.00294341	0.0172088	-0.00432427	0.00511145	-0.0119038	0.00927531	-0.0156371	-0.0114581	-0.0142093	-0.0112907	-0.000192338	0.00721817	-0.0125988	-0.00226742	-0.00464812
1	1	1	1	0.406109	0.948445	0.0512232	-0.019981	0.0647991	0.00583702	-0.0207441	0.00448958	0.0386764	-0.017536	0.0227364	-0.0323019	-0.0113771	0.0219068	0.039506	-0.00829025	0.00928755	-0.0263961	0.0232323	-0.00385182	-0.0114581	-0.0162634	-0.0132428	0.012469	0.0139447	-0.0139429	-0.00535475	-0.0150023
1	1	1	1	0.406109	0.948445	-0.00629253	-0.0191572	-0.0207151	0.00414102	-0.0207441	-0.00747169	0.00754561	-0.017536	0.00875495	-0.015411	0.00757223	0.0229464	0.00958261	0.00113109	-0.00207784	-0.00514348	0.0198699	0.00464908	-0.0114581	-0.0162634	-0.0118302	0.0181003	0.0150823	-0.0115548	-0.0129271	-0.0212956
1	1	1	1	0.406109	0.948445	0.0414438	-0.019981	0.0480193	0.0056436	-0.0207441	0.00400241	0.0335592	-0.017536	0.018483	-0.0299769	-0.0107216	0.0210612	0.0354849	-0.0073214	0.00679396	-0.0211848	0.0245774	0.00305613	-0.0114581	-0.0162634	-0.0124166	0.0160534	0.0153635	-0.0132773	-0.00775006	-0.019226
1	1	1	1	0.406109	0.948445	0.0167598	-0.019981	-0.000589567	0.00744464	-0.0207441	0.00765614	0.028219	-0.017536	0.011609	-0.0276145	-0.000493399	0.026289	0.0244785	-0.0029702	0.00125355	-0.0132464	0.0134513	0.05166	-0.0114581	-0.0162634	-0.0116124	0.0416987	0.0242156	-0.00730638	-0.0295174	-0.0517183
1	1	1	1	0.406109	0.948445	0.00580119	-0.019981	0.0110411	0.000131996	-0.0207441	-0.00652562	0.00622287	-0.017536	0.00852441	-0.0136428	-0.00794064	0.0040882	0.0149026	-0.00420737	0.00507499	-0.0108478	0.0144853	-0.0208022	-0.0114581	-0.0123275	-0.0115535	-0.0015365	0.0071238	-0.0134305	-0.00123639	-0.0024069
1	1	1	1	0.406109	0.948445	0.0371489	-0.019981	0.039613	0.00806318	-0.0207441	0.0121579	0.0358072	-0.017536	0.0156388	-0.0326505	-0.00829414	0.0241589	0.0350045	-0.00682224	0.00671129	-0.0198663	0.0232589	0.0379741	-0.0114581	-0.0162634	-0.0126432	0.036236	0.0236555	-0.0109002	-0.018192	-0.041991
1	1	1	1	0.406109	0.948445	0.04028	-0.019981	0.0478681	0.0131383	-0.0207441	0.0163581	0.0391634	-0.017536	0.0158257	-0.0338967	-0.00545147	0.024405	0.0354173	-0.00839984	0.0116009	-0.0249814	0.0385314	0.0103147	-0.0114581	-0.0162634	-0.0157363	0.0260912	0.0217686	-0.0158901	-0.0111718	-0.0289017
1	1	1	1	0.406109	0.948445	0.0135376	-0.019981	0.0147693	-0.000496858	-0.0207441	-0.00695862	0.0106262	-0.017536	0.0126856	-0.015008	-0.0129545	0.00405157	0.0215561	-0.0048745	0.00485018	-0.0115677	0.0109333	-0.0183167	-0.0114581	-0.012964	-0.0111554	-0.00136376	0.00678923	-0.0127281	-0.00159647	-0.00304257
1	1	1	1	0.406109	0.948445	0.0194831	-0.019981	0.0254967	0.00282573	-0.0207441	-0.00273168	0.0168912	-0.017536	0.0139677	-0.0188803	-0.00924977	0.00830531	0.0232736	-0.00549572	0.00733023	-0.0161774	0.0185043	-0.0188529	-0.0114581	-0.014749	-0.0128706	0.00134342	0.00915269	-0.0145707	-0.00215624	-0.00537287
1	1	1	1	0.406109	0.948445	0.0329568	-0.019981	0.0418121	0.000965157	-0.0207441	-0.00504589	0.0233763	-0.017536	0.0186466	-0.0223583	-0.0119456	0.0127704	0.0291684	-0.00634963	0.00603042	-0.0190248	0.0157187	-0.018718	-0.0114581	-0.0123814	-0.0118035	0.000557296	0.0080453	-0.0134083	-0.00123766	-0.00364144
1	1	1	1	0.406109	0.948445	0.0169944	-0.019981	0.0197992	0.00164322	-0.0207441	-0.00594435	0.0152448	-0.017536	0.0147096	-0.0172348	-0.0120809	0.00624025	0.0226304	-0.00542879	0.00662489	-0.0161836	0.0114358	-0.0158632	-0.0114581	-0.0138414	-0.011734	0.000789223	0.00787948	-0.0129949	-0.00198202	-0.00496291
1	1	1	1	0.406109	0.948445	0.0476171	-0.019981	0.0586945	0.00807876	-0.0207441	0.00855296	0.0390631	-0.017536	0.0200263	-0.0333712	-0.00875915	0.0233935	0.0384244	-0.00817459	0.00961651	-0.0253299	0.0281534	0.00464729	-0.0114581	-0.0162634	-0.0142018	0.0192359	0.0174726	-0.0144217	-0.00808189	-0.0219001
1	1	1	1	0.406109	0.948445	0.040017	-0.019981	0.0465128	0.00378448	-0.0207441	0.000821633	0.0310869	-0.017536	0.0185683	-0.0291689	-0.00923391	0.0211388	0.0340602	-0.00618492	0.00612343	-0.020177	0.0212158	0.00547712	-0.0114581	-0.0162634	-0.0113055	0.0160713	0.0145343	-0.0118126	-0.00815206	-0.0192105
1	1	1	1	0.406109	0.948445	0.0348093	-0.019981	0.043891	0.00687668	-0.0207441	0.00248958	0.0289373	-0.017536	0.0172288	-0.0267085	-0.00645735	0.0179626	0.0305297	-0.00661275	0.00954117	-0.0219413	0.0262775	-0.0106401	-0.0114581	-0.0162634	-0.0137697	0.00885507	0.0130326	-0.0149894	-0.00479722	-0.0122025
1	1	1	1	0.406109	0.948445	0.0290702	-0.019981	0.0341682	0.00579054	-0.0207441	-0.000335231	0.0256022	-0.017536	0.0170171	-0.0244729	-0.00990774	0.014508	0.0289066	-0.00674733	0.00865847	-0.0213274	0.0161979	-0.00574423	-0.0114581	-0.0162634	-0.0132224	0.00875206	0.0120872	-0.0137436	-0.00529415	-0.0133728
1	1	1	1	0.406109	0.948445	0.0483306	-0.019981	0.0562189	0.0117174	-0.0207441	0.0225919	0.0456089	-0.017536	0.017041	-0.0375953	-0.0096617	0.0260694	0.0416078	-0.00955244	0.00993782	-0.0252713	0.0344118	0.0365073	-0.0114581	-0.0162634	-0.0161713	0.04086	0.0274373	-0.0135097	-0.0179421	-0.0448774
1	1	1	1	0.406109	0.948445	0.0442849	-0.019981	0.0558384	0.00590909	-0.0207441	0.00499535	0.0338474	-0.017536	0.0191926	-0.0304531	-0.00896466	0.0213445	0.0359683	-0.00755347	0.00867496	-0.0232031	0.0271894	-0.00589719	-0.0114581	-0.0162634	-0.0132588	0.0120131	0.0142353	-0.0147147	-0.00595812	-0.0149803
1	1	1	1	0.406109	0.948445	0.0268901	-0.019981	0.0357063	-0.00101829	-0.0207441	-0.00734281	0.0169499	-0.017536	0.0159076	-0.0204309	-0.0117525	0.0115921	0.0264598	-0.00556913	0.00491423	-0.0146289	0.0131342	-0.019795	-0.0114581	-0.011437	-0.0113513	-0.00103543	0.00703737	-0.0129904	-0.000698823	-0.00217972
1	1	1	1	0.406109	0.948445	-0.011194	-0.0191104	-0.0122768	-0.00164885	-0.0207441	-0.00747169	-0.00347729	-0.017536	0.00456624	-0.00748644	-0.0116407	-0.00452273	0.00849352	-0.00316557	0.00354689	-0.00524634	0.0128432	-0.0223311	-0.0114581	-0.0122472	-0.0122047	-0.00250689	0.00687375	-0.0139372	-0.000679478	-0.00179435
1	1	1	1	0.406109	0.948445	-0.00118475	-0.019981	-0.00183082	0.000334503	-0.0207441	-0.00747169	0.00403617	-0.017536	0.00822631	-0.0106796	-0.0108928	-0.000324449	0.0129264	-0.00405909	0.00456038	-0.00991197	0.0134601	-0.0209438	-0.0114581	-0.012949	-0.012106	-0.00161864	0.00724115	-0.0137905	-0.00109303	-0.00267137
1	0	0	0	0.406109	0.948445	-0.0227141	0.011166	-0.0207151	-0.00673782	0.0346318	-0.00747169	-0.0265393	0.0168225	-0.016127	0.0177204	0.0034644	-0.0128435	-0.0271948	0.00515932	-0.00762529	0.0182174	-0.0101258	-0.0203135	-0.0114581	-0.00335744	-0.00476103	-0.00931167	-0.000863571	-0.00628213	-0.00526557	0.00378093
1	1	1	1	0.406109	0.948445	-0.0115174	-0.0176016	-0.0207151	-0.000435916	-0.0207441	-0.00747169	0.00385439	-0.017536	0.00918334	-0.0143715	0.00537622	0.0181652	0.00700669	0.00346438	-0.00364776	-0.00264582	-0.0266579	0.0481407	-0.0114581	-0.0162634	0.000792894	0.0240195	0.00951191	0.00248869	-0.033074	-0.0378994
1	1	1	1	0.406109	0.948445	-0.0227141	-0.00563638	-0.0207151	-0.00342419	-0.017058	-0.00747169	-0.0148751	-0.017536	0.00336479	-0.00103806	0.00555574	0.00770104	-0.00177524	0.00326663	-0.004448	0.00329363	-0.00316963	-0.000814454	-0.0114581	-0.0136867	-0.00595388	0.00470604	0.00594217	-0.00674686	-0.010682	-0.010461
1	1	1	1	0.406109	0.948445	0.0441313	-0.019981	0.0541162	0.00647108	-0.0207441	0.00451084	0.0346249	-0.017536	0.0191205	-0.0310144	-0.0086714	0.0222348	0.0360716	-0.0074335	0.00841774	-0.0231778	0.0221731	0.00359461	-0.0114581	-0.0162634	-0.0123662	0.0157384	0.0150107	-0.0130212	-0.00766774	-0.0190665
1	1	1	1	0.406109	0.948445	0.0536474	-0.019981	0.0342758	0.0272441	-0.0207441	0.0884677	0.0692064	-0.017536	-0.000871251	-0.0404395	-0.0195571	0.0216477	0.0514234	-0.0236037	0.0144844	-0.0363795	0.0776513	0.0713637	-0.0114581	-0.0162634	-0.0323439	0.080793	0.0530546	-0.0239068	-0.0350665	-0.0889566
1	1	1	1	0.406109	0.948445	0.036625	-0.019981	0.0460584	0.000951227	-0.0207441	-0.00494484	0.0255784	-0.017536	0.0202511	-0.0233262	-0.0130473	0.0133462	0.0312632	-0.00670353	0.00634432	-0.0204019	0.0137343	-0.017809	-0.0114581	-0.0122285	-0.0115738	0.000463386	0.00775052	-0.0130081	-0.00118957	-0.00361928
1	1	1	1	0.406109	0.948445	0.0280455	-0.019981	0.0307363	0.0071761	-0.0207441	-0.00039335	0.0259411	-0.017536	0.0163508	-0.0246763	-0.0078551	0.0168095	0.0280255	-0.00656392	0.00839822	-0.0209641	0.0207663	-0.00679337	-0.0114581	-0.0162634	-0.0132949	0.00922702	0.0127247	-0.0143842	-0.00573383	-0.0138898
1	1	1	1	0.406109	0.948445	0.0359384	-0.019981	0.048539	0.00108278	-0.0207441	-0.00291445	0.0243268	-0.017536	0.0180484	-0.0240791	-0.0104926	0.0145986	0.0301352	-0.00640531	0.00646605	-0.0190602	0.0179583	-0.0179421	-0.0114581	-0.0127375	-0.0115665	0.0014237	0.00850619	-0.0133954	-0.00179557	-0.00438279
1	1	1	1	0.406109	0.948445	0.0435969	-0.019981	0.0505551	0.00793619	-0.0207441	0.00460846	0.0354726	-0.017536	0.0188752	-0.0308594	-0.00742907	0.0236945	0.0356186	-0.00760669	0.00833086	-0.0239184	0.0280033	-0.00319191	-0.0114581	-0.0162634	-0.0132773	0.0140698	0.0150501	-0.0143826	-0.00680736	-0.0168475
1	1	1	1	0.406109	0.948445	0.0365265	-0.019981	0.0387557	0.0132269	-0.0207441	0.0173203	0.0390043	-0.017536	0.0156328	-0.0321255	-0.00900921	0.0209832	0.0350731	-0.00926252	0.0106293	-0.0244347	0.0332887	0.0172084	-0.0114581	-0.0162634	-0.0191285	0.0292987	0.0238035	-0.0164666	-0.0145424	-0.0359473
1	1	1	1	0.406109	0.948445	-0.00315416	-0.0193434	-0.00744971	0.000645323	-0.0207441	-0.00747169	0.00302615	-0.017536	0.00764929	-0.0103101	-0.0112873	0.000294342	0.0123656	-0.00412844	0.00419149	-0.0099414	0.00991883	-0.0189326	-0.0114581	-0.0128774	-0.0116161	-0.00165637	0.00672772	-0.0129546	-0.00123054	-0.0028103
1	1	1	1	0.406109	0.948445	-0.00908001	-0.019981	-0.0207151	0.00404433	-0.0207441	-0.00747169	0.0104288	-0.017536	0.00857055	-0.0187993	0.00937077	0.0242283	0.00923767	0.0026093	-0.00233494	-0.00469158	1.24219e-05	0.0483734	-0.0114581	-0.0162634	-0.00727699	0.035765	0.0189213	-0.00370184	-0.0272191	-0.0436869
1	1	1	1	0.406109	0.948445	0.0331021	-0.019981	0.0413926	0.000726955	-0.0207441	-0.00588627	0.0228808	-0.017536	0.0184608	-0.0223973	-0.0113749	0.0137644	0.028985	-0.00614633	0.00564582	-0.0185902	0.0136217	-0.0171937	-0.0114581	-0.0125541	-0.0112246	0.000461722	0.00764575	-0.0127729	-0.00156406	-0.00382954
1	1	1	1	0.406109	0.948445	-0.00905957	-0.018452	-0.0207151	-0.0020053	-0.0207441	-0.00747169	0.00302156	-0.017536	0.00898448	-0.0133831	0.00701066	0.019756	0.00895801	0.00285649	-0.0049918	-0.00129117	-0.000259836	0.025983	-0.0114581	-0.0162634	-0.00419107	0.0232003	0.0127329	-0.00379358	-0.0210102	-0.0274048
1	1	1	1	0.406109	0.948445	0.0151626	-0.019981	0.00984136	0.00348108	-0.0207441	-0.00747169	0.0145121	-0.017536	0.0123262	-0.0180937	-0.00622643	0.013798	0.0207839	-0.00435449	0.00435912	-0.0136443	0.0115255	-0.00848442	-0.0114581	-0.0158613	-0.010446	0.00469623	0.00896721	-0.011546	-0.0053111	-0.00916183
1	1	1	1	0.406109	0.948445	0.0331578	-0.019981	0.0404731	0.00484342	-0.0207441	0.00138144	0.027033	-0.017536	0.0166362	-0.0262262	-0.00980963	0.0165016	0.030797	-0.00656043	0.00779608	-0.0199439	0.0182597	0.000373495	-0.0114581	-0.0162634	-0.0115032	0.0121928	0.0130141	-0.0124819	-0.00672273	-0.0160674
1	1	1	1	0.406109	0.948445	-0.000999173	-0.019981	0.003057	-0.000929481	-0.0207441	-0.00701418	0.00192666	-0.017536	0.00635211	-0.01102	-0.00943794	0.000187627	0.0118537	-0.00400687	0.00425891	-0.00858003	0.0118085	-0.0208369	-0.0114581	-0.0116017	-0.0112536	-0.00233324	0.00645762	-0.0130006	-0.00071577	-0.00152587
1	1	1	1	0.406109	0.948445	-0.0130194	-0.017897	-0.0150794	-0.00207983	-0.0207441	-0.00747169	-0.00458216	-0.017536	0.00413821	-0.00653958	-0.0119916	-0.00527571	0.00744786	-0.00300322	0.0030735	-0.00486739	0.0115842	-0.0219639	-0.0114581	-0.0119717	-0.0119031	-0.00279698	0.0065059	-0.0134975	-0.000525462	-0.00141853
1	1	1	1	0.406109	0.948445	0.0492971	-0.019981	0.0570491	0.013239	-0.0207441	0.0187697	0.0455789	-0.017536	0.0184597	-0.0365828	-0.00781094	0.0265878	0.040757	-0.00994042	0.0112127	-0.0278147	0.0376158	0.0170569	-0.0114581	-0.0162634	-0.0182438	0.0308649	0.0242653	-0.0161335	-0.0134979	-0.034973
1	1	1	1	0.406109	0.948445	-0.0091874	-0.0185262	-0.0207151	0.00288412	-0.0207441	-0.00747169	0.00545381	-0.017536	0.00828416	-0.0143402	0.00259999	0.0175189	0.00887535	0.000939109	-0.00146446	-0.00489558	-0.00173568	0.0248908	-0.0114581	-0.0162634	-0.00734312	0.0195087	0.012805	-0.00632421	-0.0194064	-0.0290009
1	1	1	1	0.406109	0.948445	0.0392523	-0.019981	0.0474947	0.00888624	-0.0207441	0.00948468	0.034523	-0.017536	0.0170796	-0.0306101	-0.00860755	0.0204801	0.034781	-0.00799918	0.00975979	-0.0231014	0.031922	0.000157333	-0.0114581	-0.0162634	-0.0143529	0.0170959	0.0171975	-0.0154777	-0.008321	-0.0207666
1	1	1	1	0.406109	0.948445	0.0199183	-0.019981	0.0247494	0.00296221	-0.0207441	-0.00470439	0.0167307	-0.017536	0.0138827	-0.0193306	-0.00728873	0.0111285	0.022672	-0.00512368	0.00693171	-0.0164271	0.0178592	-0.0187422	-0.0114581	-0.0138603	-0.0123803	0.00104565	0.00874605	-0.0141869	-0.00234827	-0.00513527
1	1	1	1	0.406109	0.948445	0.0454808	-0.019981	0.0606144	0.00297835	-0.0207441	0.00116703	0.0319785	-0.017536	0.0208021	-0.0285572	-0.0107327	0.0181903	0.0354958	-0.00719629	0.00822082	-0.0229243	0.0235935	-0.0146938	-0.0114581	-0.0147064	-0.0125427	0.00554784	0.0109309	-0.0141692	-0.0029096	-0.00787688
1	1	1	1	0.406109	0.948445	-0.000999173	-0.019981	0.003057	-0.000929481	-0.0207441	-0.00701418	0.00192666	-0.017536	0.00635211	-0.01102	-0.00943794	0.000187627	0.0118537	-0.00400687	0.00425891	-0.00858003	0.0118085	-0.0208369	-0.0114581	-0.0116017	-0.0112536	-0.00233324	0.00645762	-0.0130006	-0.00071577	-0.00152587
1	1	1	1	0.406109	0.948445	0.0414077	-0.019981	0.0500954	0.00595896	-0.0207441	0.00292675	0.0325577	-0.017536	0.0186307	-0.0298353	-0.00802036	0.0217423	0.0342766	-0.00691057	0.0080878	-0.0224991	0.025704	-0.00133223	-0.0114581	-0.0162634	-0.0128192	0.0139389	0.0146688	-0.0137382	-0.00683153	-0.0170566
1	1	1	1	0.406109	0.948445	0.0237969	-0.019981	0.0241418	0.00566423	-0.0207441	0.0017027	0.0236727	-0.017536	0.0142368	-0.0246691	-0.00823515	0.0164008	0.0270714	-0.00553198	0.00652706	-0.0167907	0.0152342	0.0148779	-0.0114581	-0.0162634	-0.0109565	0.0189555	0.0156162	-0.0115432	-0.0118259	-0.0254598
1	1	1	1	0.406109	0.948445	0.0518734	-0.019981	0.0525347	0.019136	-0.0207441	0.0519355	0.0567547	-0.017536	0.0103604	-0.0406396	-0.0115783	0.0253492	0.0466683	-0.0147797	0.0130993	-0.0296646	0.0661325	0.0373403	-0.0114581	-0.0162634	-0.0255817	0.0546722	0.0388888	-0.0213591	-0.0226291	-0.0589187
1	1	1	1	0.406109	0.948445	-0.0227141	-0.011328	-0.0207151	-0.000939057	-0.0207441	-0.00747169	-0.00788238	-0.017536	0.00492436	-0.00557467	0.00663731	0.0122258	0.00174091	0.00254627	-0.00354569	0.000712647	0.00412856	0.0034894	-0.0114581	-0.0162634	-0.0079649	0.0106824	0.00963104	-0.00831647	-0.0111547	-0.0150399
1	1	1	1	0.406109	0.948445	0.0188347	-0.019981	0.00426141	0.0147255	-0.0207441	0.0165535	0.0334274	-0.017536	0.0103798	-0.0303759	-0.00323671	0.0248077	0.0263221	-0.00610186	0.00657097	-0.0182846	0.0205128	0.051919	-0.0114581	-0.0162634	-0.0159983	0.0441593	0.0281622	-0.0120875	-0.0260957	-0.0556525
1	1	1	1	0.406109	0.948445	0.0526828	-0.019981	0.0610531	0.0137077	-0.0207441	0.0251027	0.048851	-0.017536	0.0178763	-0.0373555	-0.0102917	0.025341	0.0437571	-0.0114004	0.0113304	-0.0281339	0.044694	0.0101781	-0.0114581	-0.0162634	-0.0199445	0.0294917	0.0250555	-0.018566	-0.0126083	-0.0333324
1	1	1	1	0.406109	0.948445	0.0371292	-0.019981	0.0410982	0.0054491	-0.0207441	0.00561593	0.0320598	-0.017536	0.0169907	-0.0301245	-0.00892768	0.021933	0.0339703	-0.00634853	0.00612382	-0.0192553	0.0227017	0.0186173	-0.0114581	-0.0162634	-0.0116495	0.0244176	0.0184116	-0.0117202	-0.0122004	-0.0285285
1	1	1	1	0.406109	0.948445	-0.00788493	-0.0193355	-0.0207151	0.00418298	-0.0207441	-0.00747169	0.00537163	-0.017536	0.00765136	-0.0135502	3.41877e-05	0.0145248	0.0101268	-0.000854909	0.000317352	-0.00599006	0.00821379	0.00620925	-0.0114581	-0.0162634	-0.0107181	0.0124259	0.0121757	-0.0110767	-0.0130586	-0.020605
1	1	1	1	0.406109	0.948445	0.046262	-0.019981	0.054361	0.00999496	-0.0207441	0.0168989	0.0421669	-0.017536	0.0173662	-0.035815	-0.00925367	0.0250421	0.0397255	-0.00865379	0.00913071	-0.0239024	0.0306283	0.0296003	-0.0114581	-0.0162634	-0.0150685	0.0352298	0.02443	-0.0131038	-0.0153515	-0.0387902
1	1	1	1	0.406109	0.948445	0.0274672	-0.019981	0.0354215	5.25208e-05	-0.0207441	-0.00635891	0.0189657	-0.017536	0.016418	-0.0206294	-0.0118051	0.0115575	0.0264788	-0.00597726	0.005051	-0.016252	0.0142208	-0.0200346	-0.0114581	-0.0117459	-0.011619	-0.000765242	0.00734869	-0.0132946	-0.000784191	-0.00245876
1	1	1	1	0.406109	0.948445	0.0271627	-0.019981	0.0356212	-0.000182508	-0.0207441	-0.00643649	0.0184461	-0.017536	0.0161241	-0.0205759	-0.0112839	0.0115593	0.0261587	-0.00578166	0.00510434	-0.0159736	0.0148322	-0.0199257	-0.0114581	-0.0117504	-0.0115936	-0.00054306	0.00746134	-0.01329	-0.000905222	-0.00261874
1	1	1	1	0.406109	0.948445	-0.0173003	-0.0119278	-0.0207151	0.00100367	-0.0207441	-0.00747169	-0.0054733	-0.017536	0.00377462	-0.00517032	-0.00568847	0.00111551	0.00453607	-0.00169258	0.00139102	-0.00458572	0.00763807	-0.0181075	-0.0114581	-0.0121097	-0.0108035	-0.00211759	0.00601616	-0.0121028	-0.00266839	-0.00304881
1	1	1	1	0.406109	0.948445	0.0370121	-0.019981	0.0372519	0.0147042	-0.0207441	0.0190223	0.0409197	-0.017536	0.0149525	-0.0335853	-0.0080162	0.0233555	0.035361	-0.00926313	0.0105861	-0.0249108	0.0286355	0.0318264	-0.0114581	-0.0162634	-0.0177323	0.0358717	0.0255879	-0.0141333	-0.0184933	-0.0435997
1	1	1	1	0.406109	0.948445	0.0261723	-0.019981	0.0295878	0.00556021	-0.0207441	-0.000872832	0.0229887	-0.017536	0.0153239	-0.0240428	-0.0070298	0.0162314	0.0269461	-0.00566744	0.0077416	-0.0188254	0.0166505	0.00147939	-0.0114581	-0.0162634	-0.0117005	0.0121017	0.0130256	-0.0124984	-0.00766576	-0.0171545
1	1	1	1	0.406109	0.948445	0.0365205	-0.019981	0.0413296	0.00407639	-0.0207441	0.00112575	0.0291776	-0.017536	0.0175191	-0.0277943	-0.00839806	0.0201988	0.0326173	-0.00615659	0.00601129	-0.0191766	0.0245506	5.99675e-05	-0.0114581	-0.0162634	-0.0124288	0.0138768	0.0145042	-0.0134525	-0.00806689	-0.0180118
1	1	1	1	0.406109	0.948445	0.0336882	-0.019981	0.0376362	0.00553721	-0.0207441	-0.000778262	0.0278775	-0.017536	0.0174995	-0.0260001	-0.00659947	0.01988	0.0300439	-0.00638945	0.00674322	-0.0205431	0.0303833	-0.0201153	-0.0114581	-0.0156484	-0.0146326	0.00480354	0.0120102	-0.0165168	-0.00325264	-0.00801418
1	1	1	1	0.406109	0.948445	0.0487329	-0.019981	0.0617402	0.00668187	-0.0207441	0.00657133	0.0373674	-0.017536	0.0206565	-0.0324605	-0.00970775	0.0223043	0.0385488	-0.00816976	0.00951851	-0.0253599	0.0264091	-0.000684263	-0.0114581	-0.0162634	-0.0131398	0.0148719	0.0152589	-0.014073	-0.00687996	-0.0178094
1	1	1	1	0.406109	0.948445	0.0421934	-0.019981	0.0482481	0.00726949	-0.0207441	0.00826472	0.0361106	-0.017536	0.0180748	-0.0316345	-0.0096592	0.0225519	0.0364417	-0.0075978	0.00748217	-0.0220479	0.0259721	0.0115125	-0.0114581	-0.0162634	-0.0135314	0.0216786	0.018221	-0.0135117	-0.0109854	-0.0262048
1	1	1	1	0.406109	0.948445	-0.0030385	-0.018674	-0.0207151	-0.000371995	-0.0207441	-0.00747169	0.00637001	-0.017536	0.01	-0.0154072	0.0034033	0.0204292	0.0119616	0.00126696	-0.00327029	-0.00394853	0.0102672	0.016441	-0.0114581	-0.0162634	-0.0080256	0.0201659	0.0139441	-0.00802775	-0.0153956	-0.0242828
1	1	1	1	0.406109	0.948445	0.0382168	-0.019981	0.046219	0.00263939	-0.0207441	0.00110702	0.0286235	-0.017536	0.0185319	-0.0266493	-0.0106262	0.0174768	0.0332718	-0.00635689	0.00609142	-0.0188345	0.0220657	-0.00513312	-0.0114581	-0.0162634	-0.0120273	0.0096565	0.0125072	-0.0134778	-0.00680206	-0.0142368
1	1	1	1	0.406109	0.948445	0.00718849	-0.019981	-0.0207151	0.00422439	-0.0207441	0.00986878	0.027914	-0.017536	0.00831517	-0.0270882	0.0038689	0.0278376	0.0199313	0.000344257	-0.00490602	-0.00819279	-0.0142542	0.0920657	-0.0114581	-0.0162634	0.00101515	0.0585449	0.0236295	0.00619477	-0.0512091	-0.0685507
1	1	1	1	0.406109	0.948445	0.0268901	-0.019981	0.0357063	-0.00101829	-0.0207441	-0.00734281	0.0169499	-0.017536	0.0159076	-0.0204309	-0.0117525	0.0115921	0.0264598	-0.00556913	0.00491423	-0.0146289	0.0131342	-0.019795	-0.0114581	-0.011437	-0.0113513	-0.00103543	0.00703737	-0.0129904	-0.000698823	-0.00217972
1	1	1	1	0.406109	0.948445	0.0163926	-0.019981	-0.00335131	0.017289	-0.0207441	0.0232881	0.0357561	-0.017536	0.00817655	-0.0306482	-0.00359698	0.0238156	0.0256694	-0.00694822	0.00683599	-0.0186948	0.0259825	0.0563362	-0.0114581	-0.0162634	-0.0193542	0.0498231	0.0319673	-0.0136812	-0.0299046	-0.0629788
1	1	1	1	0.406109	0.948445	-0.00368463	-0.019981	-0.0207151	0.00880584	-0.0207441	0.000304394	0.0190775	-0.017536	0.00792948	-0.0230198	0.00348454	0.023636	0.0129367	0.000130693	-0.000354531	-0.00830865	0.00208388	0.0588346	-0.0114581	-0.0162634	-0.00978072	0.0411557	0.0228147	-0.00524868	-0.0342673	-0.0557201
1	1	1	1	0.406109	0.948445	0.0322397	-0.019981	0.0368039	0.00675735	-0.0207441	0.00414993	0.0290116	-0.017536	0.0155937	-0.0283939	-0.00789083	0.0201336	0.0306102	-0.00612068	0.00756231	-0.0196187	0.019121	0.0169947	-0.0114581	-0.0162634	-0.0109725	0.0218832	0.0168777	-0.0111226	-0.011323	-0.0262822
1	1	1	1	0.406109	0.948445	0.0393419	-0.019981	0.0472322	0.00598721	-0.0207441	0.0028307	0.0309872	-0.017536	0.0184029	-0.0283708	-0.00791798	0.0201931	0.033572	-0.00711279	0.00825355	-0.0220779	0.0252003	-0.00785312	-0.0114581	-0.0162634	-0.0140425	0.0102217	0.0137731	-0.0153498	-0.0061231	-0.0145991
1	1	1	1	0.406109	0.948445	0.0343175	-0.019981	0.0426942	0.00117912	-0.0207441	-0.00494511	0.0244803	-0.017536	0.0195448	-0.0224915	-0.0127182	0.0127368	0.0301308	-0.00657281	0.00613434	-0.0197094	0.0147903	-0.0184909	-0.0114581	-0.0125393	-0.0119961	0.000497724	0.00800972	-0.0134012	-0.00123448	-0.00374576
1	1	1	1	0.406109	0.948445	0.0370415	-0.019981	0.0470028	0.00103733	-0.0207441	-0.00418852	0.0254474	-0.017536	0.0195803	-0.0239436	-0.0119309	0.014558	0.0313249	-0.00652787	0.00621374	-0.0197503	0.0148418	-0.0159045	-0.0114581	-0.0130957	-0.0112707	0.00168182	0.00826426	-0.0128718	-0.00190771	-0.00487023
1	1	1	1	0.406109	0.948445	0.0160703	-0.019981	0.00397043	0.00903806	-0.0207441	0.000309449	0.0243238	-0.017536	0.0119926	-0.0251936	-0.00198463	0.0229695	0.0227382	-0.00382036	0.00427035	-0.0150907	0.0106431	0.0346351	-0.0114581	-0.0162634	-0.0110843	0.0299446	0.0193941	-0.00889151	-0.0192937	-0.0379693
1	1	1	1	0.406109	0.948445	0.0246732	-0.019981	0.0266857	0.00669954	-0.0207441	-0.00116024	0.0238869	-0.017536	0.0156443	-0.0232819	-0.00860933	0.0144038	0.0266195	-0.00647975	0.00832751	-0.0203941	0.0214989	-0.0128873	-0.0114581	-0.0162634	-0.0142888	0.00636587	0.0118847	-0.0151932	-0.00415533	-0.0107534
1	1	1	1	0.406109	0.948445	0.0240067	-0.019981	-0.0207151	0.014832	-0.00456343	0.103265	0.055923	-0.017536	-0.0211698	-0.0268015	-0.0329174	0.00503573	0.0307437	-0.0244695	-0.00267485	-0.0287562	0.0586907	0.0755266	-0.0114581	-0.0162634	-0.0275869	0.0753148	0.046784	-0.016117	-0.0640984	-0.0988917
1	1	1	1	0.406109	0.948445	0.0398367	-0.019981	0.046064	0.0066172	-0.0207441	0.003518	0.0327954	-0.017536	0.0189358	-0.0292919	-0.0074113	0.0217093	0.0340753	-0.00699764	0.00794275	-0.0224853	0.0255318	-0.00125212	-0.0114581	-0.0162634	-0.0138935	0.0141032	0.0152761	-0.014793	-0.00786273	-0.0186738
1	0	0	1	0.406109	0.948445	-0.0227141	0.00481759	-0.0207151	-0.0114112	-0.0170731	-0.00747169	-0.0209031	-0.017536	0.0041455	0.00228762	0.0118743	0.0067504	-0.00623432	0.00793876	-0.00877307	0.00703812	-0.0415133	0.0445019	-0.0114581	0.000297231	0.021375	0.00745524	-0.0107466	0.0228133	-0.042597	-0.0164234
1	1	1	1	0.406109	0.948445	0.00158685	-0.019981	0.00545102	-0.000652831	-0.0207441	-0.00695502	0.00358303	-0.017536	0.00755807	-0.0119383	-0.00939795	0.00127079	0.0134172	-0.00408789	0.00461984	-0.00943165	0.0126254	-0.0206589	-0.0114581	-0.0121073	-0.0114592	-0.00195938	0.00677539	-0.0132269	-0.000959639	-0.00203764
1	1	1	1	0.406109	0.948445	-0.00342531	-0.019981	-0.0207151	0.000844314	-0.0207441	-0.00747169	0.00513052	-0.017536	0.00934844	-0.0147716	0.00700715	0.0205289	0.0110657	0.0011975	-0.00158153	-0.0049957	0.0200002	0.000935887	-0.0114581	-0.0162634	-0.00984071	0.0137647	0.0127817	-0.010909	-0.0106463	-0.0169362
1	1	1	1	0.406109	0.948445	0.00301731	-0.019981	0.0036532	0.000320085	-0.0207441	-0.00747169	0.00634113	-0.017536	0.00954105	-0.0122928	-0.0107375	0.00162994	0.0148372	-0.00428157	0.00496182	-0.0114682	0.013365	-0.020982	-0.0114581	-0.0124797	-0.0120722	-0.0016197	0.00716114	-0.0136336	-0.000939142	-0.00242153
1	1	1	1	0.406109	0.948445	-0.00824528	-0.0141664	-0.0207151	-0.000216745	-0.0207441	-0.00747169	-0.000190643	-0.017536	0.00857742	-0.0106046	0.00687687	0.0173013	0.00830588	0.00126007	-0.00203664	-0.00360428	0.0184447	-0.0119634	-0.0114581	-0.0143754	-0.0109198	0.00578135	0.00991118	-0.0123252	-0.00694209	-0.00943907
1	1	1	1	0.406109	0.948445	0.0282152	-0.019981	0.0296631	0.00957345	-0.0207441	0.0042124	0.0287961	-0.017536	0.0153377	-0.0270182	-0.00673106	0.0189583	0.028904	-0.00681925	0.00902251	-0.021261	0.0216162	0.00651394	-0.0114581	-0.0162634	-0.0139552	0.0176778	0.0164867	-0.0140318	-0.0093983	-0.0228861
1	1	1	1	0.406109	0.948445	0.000856652	-0.019981	-0.0120154	0.00161571	-0.0207441	-0.00747169	0.00605262	-0.017536	0.00922678	-0.0139396	-0.00255086	0.0117806	0.0138777	-0.00182597	0.00208181	-0.00810312	0.0100009	-0.00265726	-0.0114581	-0.0162634	-0.0101328	0.00691329	0.00974571	-0.0111038	-0.00850244	-0.0135155
1	1	1	1	0.406109	0.948445	-0.00960031	-0.0180888	-0.015161	-6.39369e-05	-0.0207441	-0.00747169	-0.000624949	-0.017536	0.00593086	-0.00759545	-0.0115781	-0.003168	0.00915343	-0.00344033	0.00348132	-0.00759762	0.0114761	-0.0202774	-0.0114581	-0.0130757	-0.0120655	-0.00194754	0.0069024	-0.0134122	-0.00125043	-0.0027065
1	1	1	1	0.406109	0.948445	-0.0161301	-0.0165916	-0.020148	-0.00169641	-0.0207441	-0.00747169	-0.00549947	-0.017536	0.00341136	-0.00492007	-0.0121564	-0.0071492	0.00559615	-0.00314979	0.00275492	-0.00490818	0.0101669	-0.0216423	-0.0114581	-0.0116394	-0.0116334	-0.00307718	0.00617324	-0.0131942	-0.000375377	-0.00107537
1	1	1	1	0.406109	0.948445	0.0338431	-0.019981	0.0380601	0.00747181	-0.0207441	0.0044406	0.0309965	-0.017536	0.0161486	-0.0296053	-0.0077986	0.0214502	0.0314676	-0.00624232	0.00775957	-0.0205724	0.0165157	0.023972	-0.0114581	-0.0162634	-0.0106194	0.025496	0.0179166	-0.0100971	-0.012358	-0.0295509
1	1	1	1	0.406109	0.948445	0.0129673	-0.019981	0.0140782	0.00187555	-0.0207441	-0.0074606	0.0126667	-0.017536	0.0125124	-0.0162978	-0.0105828	0.00731788	0.0197782	-0.00533544	0.0056394	-0.0150637	0.0125197	-0.0189309	-0.0114581	-0.0129908	-0.0116236	-0.000800725	0.00729146	-0.013237	-0.00126547	-0.00320037
1	1	1	1	0.406109	0.948445	0.0273898	-0.019981	0.0320529	0.00355879	-0.0207441	-0.00145816	0.0226044	-0.017536	0.0158895	-0.022873	-0.00982519	0.0136373	0.0277737	-0.00581905	0.00677122	-0.0175685	0.0138342	-0.00282781	-0.0114581	-0.0162634	-0.0114665	0.0084791	0.011281	-0.0124408	-0.00652346	-0.0138633
1	1	1	1	0.406109	0.948445	0.0128485	-0.019981	0.0158831	0.0015247	-0.0207441	-0.00701247	0.0134084	-0.017536	0.0130065	-0.0158972	-0.0110347	0.00604716	0.0191416	-0.00510374	0.00566794	-0.0153984	0.014215	-0.0198252	-0.0114581	-0.0124886	-0.0120884	-0.000497785	0.00762287	-0.0135518	-0.000928899	-0.00299886
1	1	1	1	0.406109	0.948445	0.0321538	-0.019981	0.032063	0.0166817	-0.0207441	0.0201919	0.0384538	-0.017536	0.0135401	-0.0315885	-0.00638971	0.0204129	0.0325331	-0.00956053	0.0125072	-0.0251245	0.0424736	0.00494864	-0.0114581	-0.0162634	-0.0220995	0.0258234	0.0243201	-0.0202583	-0.0129324	-0.0328231
1	1	1	1	0.406109	0.948445	0.0191973	-0.019981	0.0172478	0.00481346	-0.0207441	-0.00173739	0.0197601	-0.017536	0.0138263	-0.0210873	-0.00991156	0.0123667	0.0248464	-0.00565582	0.00597418	-0.01575	0.015965	-0.00225509	-0.0114581	-0.0162634	-0.0126367	0.00993171	0.0124843	-0.0133575	-0.00694276	-0.0155812
1	1	1	1	0.406109	0.948445	0.0264875	-0.019981	0.0304559	0.00487388	-0.0207441	-0.00254521	0.0226261	-0.017536	0.0160847	-0.0227077	-0.00946524	0.013772	0.0271715	-0.0063274	0.00782586	-0.0196973	0.0156955	-0.0100389	-0.0114581	-0.0162634	-0.0122301	0.00542832	0.010328	-0.0133285	-0.00426657	-0.0100256
1	1	1	1	0.406109	0.948445	0.04757	-0.019981	0.0594475	0.00430521	-0.0207441	0.00104153	0.0347185	-0.017536	0.022028	-0.0303191	-0.0118734	0.0204738	0.0374869	-0.00780518	0.00824224	-0.0248663	0.0174606	-0.00431905	-0.0114581	-0.0162634	-0.0119394	0.00979046	0.0119837	-0.0127588	-0.004872	-0.0128954
1	1	1	1	0.406109	0.948445	0.0144366	-0.019981	-0.0113095	0.0115349	-0.0207441	0.0170524	0.0345826	-0.017536	0.0100496	-0.0312556	3.40341e-05	0.030112	0.0253466	-0.00387016	0.00101135	-0.0140598	0.0220039	0.072721	-0.0114581	-0.0162634	-0.0166607	0.0582994	0.0337513	-0.00991134	-0.0339863	-0.0697794
1	1	1	1	0.406109	0.948445	0.0319359	-0.019981	0.0377832	0.00445115	-0.0207441	0.000242719	0.0259395	-0.017536	0.0162808	-0.025813	-0.00924555	0.0172319	0.0299142	-0.00610078	0.00700163	-0.0189619	0.0176394	0.00150194	-0.0114581	-0.0162634	-0.0108521	0.012262	0.012767	-0.0119173	-0.00706127	-0.0160898
1	1	1	1	0.406109	0.948445	0.00867415	-0.019981	-0.0207151	0.0182778	-0.0207441	0.057392	0.0470088	-0.017536	-0.00320965	-0.0322525	-0.00754906	0.0237787	0.0240412	-0.00999827	-0.000147011	-0.0186279	0.01186	0.127686	-0.0114581	-0.0162634	-0.0180675	0.0900867	0.0459209	-0.00454728	-0.0654175	-0.11249
1	1	1	1	0.406109	0.948445	-0.00315287	-0.019981	-0.0207151	0.00764148	-0.0207441	0.0102392	0.024324	-0.017536	0.00695829	-0.0244383	0.00208148	0.0225507	0.013251	0.00116527	-0.00373892	-0.00854763	-0.0306175	0.0941465	-0.0114581	-0.0162634	-0.00321504	0.0500928	0.0207148	0.00569427	-0.0580717	-0.0753974
1	1	1	1	0.406109	0.948445	0.0268901	-0.019981	0.0357063	-0.00101829	-0.0207441	-0.00734281	0.0169499	-0.017536	0.0159076	-0.0204309	-0.0117525	0.0115921	0.0264598	-0.00556913	0.00491423	-0.0146289	0.0131342	-0.019795	-0.0114581	-0.011437	-0.0113513	-0.00103543	0.00703737	-0.0129904	-0.000698823	-0.00217972
1	1	1	1	0.406109	0.948445	-0.0051314	-0.0192111	-0.00620837	-0.000100148	-0.0207441	-0.00747169	0.00165574	-0.017536	0.00663657	-0.00935628	-0.0105832	-0.0011716	0.0103263	-0.00376277	0.00378011	-0.00877384	0.0133576	-0.0219182	-0.0114581	-0.0122899	-0.0119816	-0.00232988	0.00685852	-0.0136484	-0.000814183	-0.00183959
1	1	1	1	0.406109	0.948445	0.0369769	-0.019981	0.0461886	0.00178424	-0.0207441	-0.00478031	0.0263377	-0.017536	0.0197526	-0.0245434	-0.0119602	0.0154462	0.0312729	-0.00689804	0.00634837	-0.0210545	0.015198	-0.0169981	-0.0114581	-0.0127795	-0.0116484	0.00139989	0.00827291	-0.013127	-0.00148862	-0.00442221
1	1	1	1	0.406109	0.948445	0.0346029	-0.019981	0.0432114	0.000995771	-0.0207441	-0.00560761	0.0242172	-0.017536	0.0193394	-0.0228037	-0.0123594	0.0135891	0.0300093	-0.00654803	0.00595043	-0.0196237	0.0138892	-0.0183751	-0.0114581	-0.0121852	-0.0114792	5.28632e-05	0.00758498	-0.0130306	-0.00116953	-0.00330274
1	1	1	1	0.406109	0.948445	0.0434443	-0.019981	0.0526703	0.00454536	-0.0207441	0.00439767	0.0338013	-0.017536	0.0189854	-0.0309539	-0.0114371	0.0211646	0.0364312	-0.00710614	0.0069008	-0.0213305	0.0188763	0.0147128	-0.0114581	-0.0162634	-0.0106321	0.0205495	0.0161067	-0.0109242	-0.0101899	-0.0242041
1	1	1	1	0.406109	0.948445	0.0468626	-0.019981	0.0585207	0.00556949	-0.0207441	0.00277088	0.0356353	-0.017536	0.0211519	-0.0308649	-0.00986252	0.0214833	0.037003	-0.00763592	0.00866368	-0.0246734	0.0256474	-0.0068404	-0.0114581	-0.0162634	-0.0129811	0.0109341	0.0133838	-0.013989	-0.00496865	-0.0133399
1	1	1	1	0.406109	0.948445	0.00154797	-0.0173255	-0.0143244	0.00384905	-0.0207441	-0.00747169	0.00692529	-0.017536	0.00899573	-0.0146942	0.0028577	0.0174824	0.0121981	-0.000889038	0.00196252	-0.00929687	0.0092402	-0.00142763	-0.0114581	-0.0159341	-0.00838449	0.00832636	0.00931277	-0.00929611	-0.00938962	-0.0127942
1	1	1	1	0.406109	0.948445	0.0268901	-0.019981	0.0357063	-0.00101829	-0.0207441	-0.00734281	0.0169499	-0.017536	0.0159076	-0.0204309	-0.0117525	0.0115921	0.0264598	-0.00556913	0.00491423	-0.0146289	0.0131342	-0.019795	-0.0114581	-0.011437	-0.0113513	-0.00103543	0.00703737	-0.0129904	-0.000698823	-0.00217972
1	1	1	1	0.406109	0.948445	0.0455132	-0.019981	0.0535466	0.0091573	-0.0207441	0.00831993	0.038803	-0.017536	0.0191182	-0.0334776	-0.00776047	0.0251478	0.0372907	-0.00793443	0.00917543	-0.0249869	0.0280925	0.0112178	-0.0114581	-0.0162634	-0.0142108	0.0228462	0.0188752	-0.0136859	-0.0103293	-0.0262375
1	1	1	1	0.406109	0.948445	0.0139235	-0.019981	0.00579351	0.00463259	-0.0207441	-0.00747169	0.0161074	-0.017536	0.0119575	-0.0195454	-0.00522422	0.016024	0.0206155	-0.00390054	0.00390589	-0.0133484	0.0110931	0.00306428	-0.0114581	-0.0162634	-0.0102762	0.0114434	0.0117113	-0.0109703	-0.00807587	-0.0161945
1	0	0	0	0.406109	0.948445	-0.0227141	0.0134506	-0.0207151	-0.00887806	0.0348218	-0.00747169	-0.0265393	0.0163196	-0.0152433	0.0200771	0.00552932	-0.0135738	-0.0280346	0.00640782	-0.00846752	0.0201901	-0.0196148	-0.0176525	-0.00927954	-0.0001553	-0.00143188	-0.0108183	-0.00375164	-0.00267773	-0.00853231	0.00492029
1	1	1	1	0.406109	0.948445	0.00536537	-0.019981	-0.0207151	0.0148029	-0.0207441	0.0222631	0.0326629	-0.017536	0.00488103	-0.0288807	-5.41988e-06	0.0248212	0.01894	-0.00353194	0.00164426	-0.0140818	0.00102722	0.0919971	-0.0114581	-0.0162634	-0.0123731	0.0619052	0.0316856	-0.0032298	-0.0476491	-0.0804613
1	1	1	1	0.406109	0.948445	0.0279846	-0.019981	-0.0207151	0.0344096	-0.00388016	0.123468	0.0686228	-0.017536	-0.0294946	-0.0355245	-0.036781	0.00535794	0.0323264	-0.0314482	0.00854153	-0.0366776	0.0804526	0.0993049	-0.0114581	-0.0162634	-0.0405387	0.100412	0.0637464	-0.0251636	-0.0583668	-0.120866
1	1	1	1	0.406109	0.948445	-0.0150528	-0.0175106	-0.0173748	-0.00190192	-0.0207441	-0.00747169	-0.00554478	-0.017536	0.00305591	-0.00575692	-0.0112415	-0.00644212	0.00600609	-0.0031608	0.00285637	-0.00471868	0.0103419	-0.021291	-0.0114581	-0.0117534	-0.0114168	-0.00299207	0.00616075	-0.0130625	-0.000550185	-0.00123809
1	1	1	1	0.406109	0.948445	0.0403939	-0.019981	0.0404866	0.0120894	-0.0207441	0.0221951	0.0423621	-0.017536	0.0154065	-0.0354172	-0.00938756	0.0254041	0.0383313	-0.00903665	0.00846296	-0.023477	0.0268856	0.0502343	-0.0114581	-0.0162634	-0.0156148	0.0453617	0.0287839	-0.0120132	-0.02348	-0.0537958
1	1	1	1	0.406109	0.948445	0.00499588	-0.019981	0.00781628	-0.00013265	-0.0207441	-0.00709119	0.00565219	-0.017536	0.0090795	-0.012678	-0.00941148	0.00239915	0.0155063	-0.00419198	0.00507077	-0.0104205	0.010898	-0.0188192	-0.0114581	-0.0127327	-0.0111858	-0.00159102	0.00671897	-0.0128555	-0.00149965	-0.00278374
1	1	1	1	0.406109	0.948445	0.0287406	-0.019981	0.0368853	0.000190973	-0.0207441	-0.00626359	0.0198807	-0.017536	0.0169077	-0.0210639	-0.0118586	0.0120724	0.0270985	-0.00604399	0.00515703	-0.016752	0.0146052	-0.0198685	-0.0114581	-0.0117995	-0.0115972	-0.000564538	0.00743794	-0.0132745	-0.000826749	-0.00258813
1	1	1	1	0.406109	0.948445	0.0277825	-0.019981	0.036726	-0.000665263	-0.0207441	-0.0067632	0.0178582	-0.017536	0.0162287	-0.0208243	-0.011737	0.0119202	0.0269813	-0.00567425	0.00512505	-0.0150838	0.0143338	-0.0201886	-0.0114581	-0.0116413	-0.0116056	-0.00082556	0.00732577	-0.0133017	-0.000755909	-0.00237299
1	1	1	1	0.406109	0.948445	0.0341344	-0.019981	0.0427634	0.00697995	-0.0207441	0.00316669	0.0287801	-0.017536	0.0172708	-0.0265858	-0.00666721	0.0173657	0.0306854	-0.0067239	0.00973359	-0.0218529	0.0264755	-0.0115017	-0.0114581	-0.0162634	-0.0140682	0.00853078	0.013103	-0.0154789	-0.00482683	-0.0121905
1	1	0	1	0.406109	0.948445	-0.0227141	-0.0140899	-0.0207151	-0.00293626	-0.0163658	-0.00747169	-0.0124689	-0.017536	-0.00121003	-0.00212365	-0.011226	-0.00960478	-0.000188396	-0.00231764	0.00130305	-0.000825754	0.0111288	-0.0235093	-0.0114581	-0.0111241	-0.011732	-0.00393065	0.00594498	-0.0134283	-5.89902e-05	-0.000196366
1	1	1	1	0.406109	0.948445	0.0460313	-0.019981	0.0600476	0.00589691	-0.0207441	0.00687764	0.0351092	-0.017536	0.0200695	-0.0301977	-0.00963051	0.0195982	0.0368759	-0.00787959	0.00942574	-0.0236637	0.0339429	-0.0144287	-0.0114581	-0.0162634	-0.0146991	0.00945134	0.0141962	-0.0165041	-0.00437011	-0.0117703
1	1	1	1	0.406109	0.948445	-0.0227141	-0.0151206	-0.0207151	-0.00357958	-0.0207441	-0.00747169	-0.0127764	-0.017536	-0.000891397	-0.00308201	-0.0109953	-0.00857974	0.00148514	-0.00216719	0.00166552	6.12073e-05	0.0110432	-0.0232341	-0.0114581	-0.0112575	-0.0116755	-0.00379682	0.00597934	-0.0134107	-0.000113638	-0.000341122
